# Supplementary material for: Temporal Evolution of Island Arc Magmatism and Its Influence on Long-Term Climate: Insights From the Izu Intra-Oceanic Arc
Source: Frontiers journal article supplement (doi:10.3389/feart.2022.810597), 2022-07-26
Supplement: Table_1.xlsx [file Table_1.xlsx]

## Sheet: glass
Table S1-1: Major, trace and volatile composition of the basaltic glass shards and mineral-hosted melt inclusions from volcanic tephras of the Izu arc front. Samples with La/Yb > 1.2 are in blue.
										wt%												wt%	ppm			ppm
References	Cruise expedition	Samples	Grain/glass shard number	Location	Latitutde	Longitude	Material	depth (mbsf)	age (Ma)	SiO2	Na2O	K2O	FeO	TiO2	MgO	CaO	MnO	Al2O3	P2O5	LOI	Total	H2O	F	Cl	B	Li	Sc	Rb	Sr	Y	Zr	Nb	Cs	Ba	La	Ce	Pr	Nd	Sm	Eu	Gd	Tb	Dy	Ho	Er	Tm	Yb	Lu	Hf
Barnes et al. (2010)	ODP Leg 126, site 782A	782A-21X-5-43-45	782A-21X-5-43-45	Izu volcanic arc	30.861	141.314	glass shards from tephra		7.474	49.83	2.52	0.37	12.04	1.04	3.06	8.62	0.28	14.3	0.05		92.11			1450
Barnes et al. (2010)	ODP Leg 126, site 782A	782A-21X-2-84-86	782A-21X-2-84-86	Izu volcanic arc	30.861	141.314	plagioclase-hosted melt inclusion		7.227	49.6	2.09	0.2	10.77	0.82	5.04	9.5	0.17	14.6	0.08		92.87			700
Barnes et al. (2010)	ODP Leg 126, site 782A	782A-21X-5-43-45	782A-21X-5-43-45	Izu volcanic arc	30.861	141.314	plagioclase-hosted melt inclusion		7.474	50.62	2.4	0.22	11.48	0.8	4.49	8.74	0.16	14.1	0.08		93.09			980
Barnes et al. (2010)	ODP Leg 126, site 782A	782A-21X-5-43-45	782A-21X-5-43-45	Izu volcanic arc	30.861	141.314	plagioclase-hosted melt inclusion		7.474	48.03	1.89	0.13	11.58	0.79	5.05	10.48	0.35	14.7	0.11		93.11			630
Barnes et al. (2010)	ODP Leg 126, site 782A	782A-39X-1-21-23	782A-39X-1-21-23	Izu volcanic arc	30.861	141.314	plagioclase-hosted melt inclusion		33.257	55.42	2.27	0.55	9.73	0.76	3.64	7.2	0.27	13.2	0.16		93.2			1710
Barnes et al. (2010)	ODP Leg 126, site 782A	782A-39X-1-21-23	782A-39X-1-21-23	Izu volcanic arc	30.861	141.314	plagioclase-hosted melt inclusion		33.257	55.24	2.29	0.58	10.22	0.88	3.82	7.36	0.25	12.7	0.1		93.44			1630
Barnes et al. (2010)	ODP Leg 126, site 782A	782A-21X-5-43-45	782A-21X-5-43-45	Izu volcanic arc	30.861	141.314	plagioclase-hosted melt inclusion		7.474	50.77	2.45	0.23	11.29	0.93	4.42	8.88	0.15	15	0.09		94.21			870
Barnes et al. (2010)	ODP Leg 126, site 782A	782A-21X-2-84-86	782A-21X-2-84-86	Izu volcanic arc	30.861	141.314	plagioclase-hosted melt inclusion		7.227	50.89	2.32	0.29	9.83	0.48	4.77	10.14	0.07	15.6	0.05		94.44			1080
Bryant et al. (2003)	ODP Leg 126, site 782A	782A-39X-1-27-28	782A-39X-1-27-28-27A	Izu volcanic arc	30.861	141.314	glass shard		30.2	55.29	2.58	0.37	12.98	1.12	3.96	8.84	0.17	14.69			94.56
Barnes et al. (2010)	ODP Leg 126, site 782A	782A-21X-5-43-45	782A-21X-5-43-45	Izu volcanic arc	30.861	141.314	plagioclase-hosted melt inclusion		7.474	51.52	2.57	0.31	12.05	1.07	3.81	8.53	0.17	14.4	0.14		94.57			1220
Straub and Layne (2003)	ODP Leg 126, site 782A	782A-29X-5-13-15	782A-29X-5-13-15	Izu volcanic arc	30.861	141.314	plagioclase-hosted melt inclusion		12.1	56.39	3.16	0.48	8.88	0.87	2.81	7.03	0.25	14.55	0.16		94.58	5.01	163	1303	20	8.8
Barnes et al. (2010)	ODP Leg 126, site 782A	782A-39X-1-21-23	782A-41X-4-71-73	Izu volcanic arc	30.861	141.314	plagioclase-hosted melt inclusion		39.981	55.13	2.3	0.29	9.45	0.8	3.94	8	0.17	14.4	0.11		94.59			700
Straub and Layne (2003)	ODP Leg 126, site 782A	782A-29X-5-13-15	782A-29X-5-13-15	Izu volcanic arc	30.861	141.314	plagioclase-hosted melt inclusion		12.1	47.89	1.61	0.2	11.35	0.71	5.84	11.62	0.24	15.06	0.11		94.63	4.97	72	635	10	4.1
Straub (2003)	ODP Leg 126, site 782A	782A-29X-5-13-15	782A-29X-5-13-15-14B	Izu volcanic arc	30.861	141.314	plagioclase-hosted melt inclusion		12.1	47.89	1.61	0.2	11.35	0.71	5.84	11.62	0.24	15.06	0.11		94.63	4.97	72	635	10	4.1
Straub and Layne (2003)	ODP Leg 126, site 782A	782A-29X-5-13-15	782A-29X-5-13-15	Izu volcanic arc	30.861	141.314	plagioclase-hosted melt inclusion		13.35	47.89	1.61	0.2	11.35	0.71	5.84	11.62	0.24	15.06	0.11		94.63	5.37	72	635	10	4.1
Barnes et al. (2010)	ODP Leg 126, site 782A	782A-21X-5-43-45	782A-21X-5-43-45	Izu volcanic arc	30.861	141.314	glass shards from tephra		7.474	51.02	2.59	0.3	11.25	1.08	4.01	8.89	0.19	15.2	0.11		94.64			610
Barnes et al. (2010)	ODP Leg 126, site 782A	782A-21X-5-43-45	782A-21X-5-43-45	Izu volcanic arc	30.861	141.314	plagioclase-hosted melt inclusion		7.474	52.8	2.81	0.38	11.49	0.98	3.92	8.18	0.14	13.9	0.17		94.77			1830
Barnes et al. (2010)	ODP Leg 126, site 782A	782A-21X-2-84-86	782A-21X-2-84-86	Izu volcanic arc	30.861	141.314	plagioclase-hosted melt inclusion		7.227	49.24	1.87	0.22	10.84	0.78	6.34	11.2	0.26	14	0.04		94.79			280
Barnes et al. (2010)	ODP Leg 126, site 782A	782A-23X-6-135-137	782A-23X-6-135-137	Izu volcanic arc	30.861	141.314	plagioclase-hosted melt inclusion		8.793	53.22	2.83	0.34	11.04	1.01	3.68	8.14	0.15	14.3	0.08		94.79			1240
Barnes et al. (2010)	ODP Leg 126, site 782A	782A-23X-6-135-137	782A-23X-6-135-137	Izu volcanic arc	30.861	141.314	plagioclase-hosted melt inclusion		8.793	53.17	2.48	0.27	11.84	1.02	4.24	8.42	0.17	13.1	0.09		94.8			1850
Barnes et al. (2010)	ODP Leg 126, site 782A	782A-14X-2-9-11	782A-14X-2-9-11	Izu volcanic arc	30.861	141.314	glass shards from tephra		3.426	54.92	2.97	0.34	10.34	0.86	3.25	7.34	0.27	14.5	0.08		94.87			2710
Barnes et al. (2010)	ODP Leg 126, site 782A	782A-21X-2-84-86	782A-21X-2-84-86	Izu volcanic arc	30.861	141.314	glass shards from tephra		7.227	50.66	2.49	0.32	11.42	0.98	4.79	9.27	0.22	14.6	0.14		94.89			1870
Barnes et al. (2010)	ODP Leg 126, site 782A	782A-21X-5-43-45	782A-21X-5-43-45	Izu volcanic arc	30.861	141.314	plagioclase-hosted melt inclusion		7.474	53.16	2.89	0.34	11.92	1.15	3.68	7.94	0.21	13.5	0.1		94.89			1170
Barnes et al. (2010)	ODP Leg 126, site 782A	782A-26X-5-147-149	782A-26X-5-147-149	Izu volcanic arc	30.861	141.314	glass shards from tephra		10.45	53.3	2.83	0.27	9.79	1.12	3.84	8.07	0.31	15.2	0.16		94.89			890
Barnes et al. (2010)	ODP Leg 126, site 782A	782A-21X-5-43-45	782A-21X-5-43-45	Izu volcanic arc	30.861	141.314	plagioclase-hosted melt inclusion		7.474	51.18	2.52	0.27	12.73	0.95	4.17	8.65	0.19	14.1	0.14		94.9			1050
Barnes et al. (2010)	ODP Leg 126, site 782A	782A-21X-2-84-86	782A-21X-2-84-86	Izu volcanic arc	30.861	141.314	plagioclase-hosted melt inclusion		7.227	49.32	1.87	0.19	11.05	0.69	6.53	10.65	0.22	14.3	0.11		94.93			1140
Barnes et al. (2010)	ODP Leg 126, site 782A	782A-29X-5-13-15	782A-29X-5-13-15	Izu volcanic arc	30.861	141.314	plagioclase-hosted melt inclusion		11.951	54.4	2.88	0.37	9.91	1.05	3.49	7.83	0.16	14.7	0.14		94.93			1430
Straub and Layne (2003)	ODP Leg 126, site 782A	782A-29X-5-13-15	782A-29X-5-13-15	Izu volcanic arc	30.861	141.314	plagioclase-hosted melt inclusion		12.1	48.61	1.59	0.16	11.37	0.74	5.96	11.53	0.22	14.65	0.11		94.94	4.72	83	540	10	4
Straub (2003)	ODP Leg 126, site 782A	782A-29X-5-13-15	782A-29X-5-13-15-14A	Izu volcanic arc	30.861	141.314	plagioclase-hosted melt inclusion		12.1	48.61	1.59	0.16	11.37	0.74	5.96	11.53	0.22	14.65	0.11		94.94	4.72	83	540	10	4
Straub and Layne (2003)	ODP Leg 126, site 782A	782A-29X-5-13-15	782A-29X-5-13-15	Izu volcanic arc	30.861	141.314	plagioclase-hosted melt inclusion		13.35	48.61	1.59	0.16	11.37	0.74	5.96	11.53	0.22	14.65	0.11		94.94	5.06	83	540	10	4
Barnes et al. (2010)	ODP Leg 126, site 782A	782A-21X-2-50-52	782A-21X-2-50-52	Izu volcanic arc	30.861	141.314	plagioclase-hosted melt inclusion		7.207	52.67	2.54	0.34	11.79	0.89	4.44	8.07	0.2	13.9	0.1		94.94			1230
Schindlbeck et al. (2018)	IODP 350, site 1436A	350-U1436A-4H-5-105-107	350-U1436A-4H-5-105-107-8	Izu volcanic arc	32.398	140.365	glass shard		0.0523716	53.79	2.55	0.2212	11.04	1.0683	3.4	8.25	0.2375	14.32	0.0815		94.9585
Barnes et al. (2010)	ODP Leg 126, site 782A	782A-23X-6-135-137	782A-23X-6-135-137	Izu volcanic arc	30.861	141.314	plagioclase-hosted melt inclusion		8.793	53.65	2.59	0.27	11.53	0.8	4.56	8.04	0.23	13.2	0.1		94.97			1710
Barnes et al. (2010)	ODP Leg 126, site 782A	782A-39X-1-21-23	782A-39X-1-21-23	Izu volcanic arc	30.861	141.314	plagioclase-hosted melt inclusion		33.257	51.46	2.19	0.3	10.3	0.78	5.13	9.67	0.26	14.8	0.11		95			1070
Barnes et al. (2010)	ODP Leg 126, site 782A	782A-14X-2-9-11	782A-14X-2-9-11	Izu volcanic arc	30.861	141.314	glass shards from tephra		3.426	55.73	2.98	0.4	10.65	0.9	2.89	7.13	0.2	14	0.15		95.03			1790
Barnes et al. (2010)	ODP Leg 126, site 782A	782A-21X-2-84-86	782A-21X-2-84-86	Izu volcanic arc	30.861	141.314	plagioclase-hosted melt inclusion		7.227	49.05	1.85	0.16	10.83	0.8	6.68	10.8	0.27	14.5	0.1		95.04			420
Barnes et al. (2010)	ODP Leg 126, site 782A	782A-23X-6-135-137	782A-23X-6-135-137	Izu volcanic arc	30.861	141.314	glass shards from tephra		8.793	53.31	2.62	0.32	11.77	1.11	3.65	8.17	0.27	13.7	0.12		95.04			1570
Barnes et al. (2010)	ODP Leg 126, site 782A	782A-2H-4-113-114	782A-2H-4-113-114	Izu volcanic arc	30.861	141.314	plagioclase-hosted melt inclusion		0.546	56.43	2.46	0.81	3.84	0.54	0.64	9.07	0.23	20.9	0.12		95.04			2850
Barnes et al. (2010)	ODP Leg 126, site 782A	782A-21X-2-50-52	782A-21X-2-50-52	Izu volcanic arc	30.861	141.314	plagioclase-hosted melt inclusion		7.207	51.06	2.23	0.28	11.96	0.94	5.16	9.01	0.22	14.1	0.1		95.06			460
Barnes et al. (2010)	ODP Leg 126, site 782A	782A-14X-2-9-11	782A-14X-2-9-11	Izu volcanic arc	30.861	141.314	plagioclase-hosted melt inclusion		3.426	51.2	2.34	0.24	11.32	0.67	5.04	9.18	0.19	14.8	0.08		95.06			1150
Barnes et al. (2010)	ODP Leg 126, site 782A	782A-14X-2-9-11	782A-14X-2-9-11	Izu volcanic arc	30.861	141.314	glass shards from tephra		3.426	55.11	2.86	0.33	10.95	0.89	3.13	7.51	0.17	14	0.11		95.06			1720
Barnes et al. (2010)	ODP Leg 126, site 782A	782A-23X-6-135-137	782A-23X-6-135-137	Izu volcanic arc	30.861	141.314	plagioclase-hosted melt inclusion		8.793	52.68	2.5	0.27	12.02	0.67	4.97	8.26	0.34	13.3	0.05		95.06			2160
Barnes et al. (2010)	ODP Leg 126, site 782A	782A-29X-5-13-15	782A-29X-5-13-15	Izu volcanic arc	30.861	141.314	glass shards from tephra		11.951	54.06	2.73	0.42	10.52	1.02	3.67	7.71	0.24	14.57	0.13		95.07			1453
Barnes et al. (2010)	ODP Leg 126, site 782A	782A-21X-2-84-86	782A-21X-2-84-86	Izu volcanic arc	30.861	141.314	plagioclase-hosted melt inclusion		7.227	49.35	1.76	0.15	10.43	0.62	6.21	11.03	0.22	15.2	0.11		95.08			820
Schindlbeck et al. (2018)	IODP 350, site 1436A	350-U1436A-7H-4-38-40	350-U1436A-7H-4-38-40-5	Izu volcanic arc	32.398	140.365	glass shard	47.99	0.674055	52.31	2.84	0.3053	12.03	1.0719	3.88	8.29	0.1536	14.12	0.0857		95.0865
Barnes et al. (2010)	ODP Leg 126, site 782A	782A-14X-2-9-11	782A-14X-2-9-11	Izu volcanic arc	30.861	141.314	glass shards from tephra		3.426	54.84	2.91	0.4	10.91	0.81	3.25	7.42	0.26	14.2	0.09		95.09			2165
Barnes et al. (2010)	ODP Leg 126, site 782A	782A-19X-2-24-26	782A-19X-2-24-26	Izu volcanic arc	30.861	141.314	plagioclase-hosted melt inclusion		6.031	50.44	2.18	0.26	11.38	0.77	5.28	9.62	0.23	14.9	0.06		95.12			950
Bryant et al. (2003)	ODP Leg 126, site 782A	782A-39X-1-27-28	782A-39X-1-27-28-27A	Izu volcanic arc	30.861	141.314	glass shard		30.2	55.69	2.75	0.54	12.54	1	3.81	8.67	0.08	14.92			95.13
Barnes et al. (2010)	ODP Leg 126, site 782A	782A-21X-5-43-45	782A-21X-5-43-45	Izu volcanic arc	30.861	141.314	plagioclase-hosted melt inclusion		7.474	54.04	2.73	0.36	12.2	1.04	3.07	7.82	0.29	13.5	0.11		95.16			1780
Barnes et al. (2010)	ODP Leg 126, site 782A	782A-6H-6-55-57	782A-6H-6-55-57	Izu volcanic arc	30.861	141.314	glass shards from tephra		1.925	52.21	2.68	0.39	12.17	1.2	3.84	8.68	0.33	13.5	0.17		95.17			1040
Barnes et al. (2010)	ODP Leg 126, site 782A	782A-39X-1-21-23	782A-41X-4-71-73	Izu volcanic arc	30.861	141.314	plagioclase-hosted melt inclusion		39.981	54.26	2.5	0.29	10.16	0.9	4.21	8.73	0.14	13.9	0.1		95.19			1030
Schindlbeck et al. (2018)	IODP 350, site 1436A	350-U1436A-7H-4-125-127	350-U1436A-7H-4-125-127-7	Izu volcanic arc	32.398	140.365	glass shard	48.86	0.688311	54.36	3.12	0.3518	10.92	1.0942	3.21	7.81	0.2015	14.01	0.127		95.2045					7.98	45.43	4.24	140.36	30.76	53.15	0.394	0.508	95.04	2.3	6.72	1.267	7.06	2.92	1.13	4.09	0.68	4.82	1.074	3.15	0.463	3.86	0.615	1.44
Barnes et al. (2010)	ODP Leg 126, site 782A	782A-13X-3-51-53	782A-13X-3-51-53	Izu volcanic arc	30.861	141.314	glass shards from tephra		3.262	54.04	2.95	0.33	10.48	0.95	3.57	7.61	0.23	14.9	0.16		95.22			1590
Barnes et al. (2010)	ODP Leg 126, site 782A	782A-21X-2-50-52	782A-21X-2-50-52	Izu volcanic arc	30.861	141.314	plagioclase-hosted melt inclusion		7.207	51.75	2.44	0.28	11.46	0.89	5.1	8.92	0.23	14.1	0.08		95.25			630
Barnes et al. (2010)	ODP Leg 126, site 782A	782A-39X-1-21-23	782A-41X-4-71-73	Izu volcanic arc	30.861	141.314	plagioclase-hosted melt inclusion		39.981	54.22	2.47	0.22	9.86	1.02	4.19	8.9	0.09	14.1	0.18		95.25			1380
Barnes et al. (2010)	ODP Leg 126, site 782A	782A-26X-5-147-149	782A-26X-5-147-149	Izu volcanic arc	30.861	141.314	glass shards from tephra		10.45	54.06	2.92	0.27	9.5	1.15	3.79	8.07	0.19	15.1	0.21		95.26			640
Barnes et al. (2010)	ODP Leg 126, site 782A	782A-26X-5-147-149	782A-26X-5-147-149	Izu volcanic arc	30.861	141.314	glass shards from tephra		10.45	56.02	2.97	0.36	8.72	1.07	3.29	7.48	0.22	15	0.13		95.26			1160
Barnes et al. (2010)	ODP Leg 126, site 782A	782A-6H-6-55-57	782A-6H-6-55-57	Izu volcanic arc	30.861	141.314	plagioclase-hosted melt inclusion		1.925	52.66	2.43	0.35	11.38	0.92	3.95	9.01	0.23	14.2	0.13		95.26			1000
Schindlbeck et al. (2018)	IODP 350, site 1436A	350-U1436A-12F-2-10-12	350-U1436A-12F-2-10-12-14	Izu volcanic arc	32.398	140.365	glass shard	64.4	0.942966	52.94	2.75	0.2907	10.77	1.1119	3.96	8.53	0.1381	14.69	0.1016		95.2823
Barnes et al. (2010)	ODP Leg 126, site 782A	782A-6H-6-55-57	782A-6H-6-55-57	Izu volcanic arc	30.861	141.314	glass shards from tephra		1.925	53.21	2.74	0.4	11.79	1.07	3.38	8.23	0.22	14.1	0.15		95.29			1335
Barnes et al. (2010)	ODP Leg 126, site 782A	782A-21X-2-84-86	782A-21X-2-84-86	Izu volcanic arc	30.861	141.314	plagioclase-hosted melt inclusion		7.227	49.39	1.89	0.19	10.57	0.8	6.5	11.26	0.17	14.4	0.13		95.3			1450
Schindlbeck et al. (2018)	IODP 350, site 1436A	350-U1436A-9H-4-10-12	350-U1436A-9H-4-10-12-10	Izu volcanic arc	32.398	140.365	glass shard	56.64	0.815803	52.55	2.5	0.3593	12.16	1.1074	4.35	8.82	0.276	13.1	0.0816		95.3043					8.49	46.75	4.29	136.13	22.66	43.53	0.388	0.539	85.05	1.738	5.9	1.109	6.28	2.19	0.954	3.15	0.57	3.76	0.862	2.76	0.449	2.76	0.393	1.12
Barnes et al. (2010)	ODP Leg 126, site 782A	782A-21X-2-50-52	782A-21X-2-50-52	Izu volcanic arc	30.861	141.314	plagioclase-hosted melt inclusion		7.207	51.39	2.42	0.33	11.54	1	5.4	9.01	0.27	13.9	0.05		95.31			1230
Barnes et al. (2010)	ODP Leg 126, site 782A	782A-13X-3-51-53	782A-13X-3-51-53	Izu volcanic arc	30.861	141.314	glass shards from tephra		3.262	53.45	2.95	0.41	10.7	0.96	3.69	7.69	0.29	15	0.19		95.33			1430
Barnes et al. (2010)	ODP Leg 126, site 782A	782A-13X-3-51-53	782A-13X-3-51-53	Izu volcanic arc	30.861	141.314	glass shards from tephra		3.262	53.65	2.87	0.32	10.75	0.88	3.81	7.81	0.23	14.9	0.11		95.33			2080
Barnes et al. (2010)	ODP Leg 126, site 782A	782A-11X-3-0-1	782A-11X-3-0-1	Izu volcanic arc	30.861	141.314	glass shards from tephra		2.842	52.32	2.76	0.18	11.42	1.08	4.21	8.33	0.23	14.7	0.11		95.34			1380
Straub and Layne (2003)	ODP Leg 126, site 782A	782A-29X-5-13-15	782A-29X-5-13-15	Izu volcanic arc	30.861	141.314	plagioclase-hosted melt inclusion		12.1	53.43	2.69	0.37	10.8	0.99	3.82	8.04	0.24	14.83	0.14		95.35	4.44	202	1363	16	6.6
Straub (2003)	ODP Leg 126, site 782A	782A-29X-5-13-15	782A-29X-5-13-15-9B	Izu volcanic arc	30.861	141.314	plagioclase-hosted melt inclusion		12.1	53.43	2.69	0.37	10.8	0.99	3.82	8.04	0.24	14.83	0.14		95.35	4.44	202	1363	16	6.6
Straub and Layne (2003)	ODP Leg 126, site 782A	782A-29X-5-13-15	782A-29X-5-13-15	Izu volcanic arc	30.861	141.314	plagioclase-hosted melt inclusion		13.35	53.43	2.69	0.37	10.8	0.99	3.82	8.04	0.24	14.83	0.14		95.35	4.65	202	1363	16	6.6
Barnes et al. (2010)	ODP Leg 126, site 782A	782A-23X-6-135-137	782A-23X-6-135-137	Izu volcanic arc	30.861	141.314	plagioclase-hosted melt inclusion		8.793	53.28	2.73	0.37	11.76	1.11	4	8.42	0.18	13.4	0.1		95.35			1970
Barnes et al. (2010)	ODP Leg 126, site 782A	782A-26X-5-147-149	782A-26X-5-147-149	Izu volcanic arc	30.861	141.314	glass shards from tephra		10.45	55.45	2.95	0.28	9.09	1.12	3.47	7.64	0.14	15.1	0.12		95.36			1090
Barnes et al. (2010)	ODP Leg 126, site 782A	782A-29X-5-13-15	782A-29X-5-13-15	Izu volcanic arc	30.861	141.314	glass shards from tephra		11.951	53.43	2.69	0.39	10.8	0.99	3.82	8.04	0.24	14.83	0.14		95.37			1363
Barnes et al. (2010)	ODP Leg 126, site 782A	782A-28X-1-97-99	782A-28X-1-97-99	Izu volcanic arc	30.861	141.314	plagioclase-hosted melt inclusion		11.223	52.57	2.57	0.4	12.6	0.97	3.81	8.58	0.36	13.4	0.11		95.37			1380
Barnes et al. (2010)	ODP Leg 126, site 782A	782A-25X-4-111-113	782A-25X-4-111-113	Izu volcanic arc	30.861	141.314	glass shards from tephra		9.757	52.29	2.96	0.37	14.03	1.59	3.18	7.74	0.27	12.8	0.15		95.38			1190
Barnes et al. (2010)	ODP Leg 126, site 782A	782A-39X-1-21-23	782A-39X-1-21-23	Izu volcanic arc	30.861	141.314	plagioclase-hosted melt inclusion		33.257	51.79	2.17	0.26	10.76	0.73	5.38	9.38	0.13	14.7	0.09		95.39			770
Barnes et al. (2010)	ODP Leg 126, site 782A	782A-14X-2-9-11	782A-14X-2-9-11	Izu volcanic arc	30.861	141.314	glass shards from tephra		3.426	54.76	2.85	0.46	11.48	0.75	3.24	7.5	0.26	14	0.1		95.4			1620
Barnes et al. (2010)	ODP Leg 126, site 782A	782A-6H-6-55-57	782A-6H-6-55-57	Izu volcanic arc	30.861	141.314	plagioclase-hosted melt inclusion		1.925	52.86	2.28	0.39	11.63	0.71	3.99	9.26	0.17	14	0.11		95.4			910
Barnes et al. (2010)	ODP Leg 126, site 782A	782A-21X-5-43-45	782A-21X-5-43-45	Izu volcanic arc	30.861	141.314	plagioclase-hosted melt inclusion		7.474	53.29	3.07	0.4	11.82	1.04	2.57	8.43	0.19	14.5	0.09		95.4			1520
Barnes et al. (2010)	ODP Leg 126, site 782A	782A-13X-3-51-53	782A-13X-3-51-53	Izu volcanic arc	30.861	141.314	glass shards from tephra		3.262	54	2.92	0.34	10.32	0.92	3.64	7.83	0.14	15.2	0.09		95.4			1730
Barnes et al. (2010)	ODP Leg 126, site 782A	782A-19X-2-24-26	782A-19X-2-24-26	Izu volcanic arc	30.861	141.314	plagioclase-hosted melt inclusion		6.031	51.16	1.82	0.17	9.53	0.51	6.71	10.83	0.14	14.5	0.04		95.41			790
Barnes et al. (2010)	ODP Leg 126, site 782A	782A-23X-6-135-137	782A-23X-6-135-137	Izu volcanic arc	30.861	141.314	plagioclase-hosted melt inclusion		8.793	52.81	2.51	0.27	11.74	0.97	4.51	8.51	0.22	13.8	0.08		95.42			1590
Barnes et al. (2010)	ODP Leg 126, site 782A	782A-23X-6-135-137	782A-23X-6-135-137	Izu volcanic arc	30.861	141.314	plagioclase-hosted melt inclusion		8.793	54.21	2.87	0.28	10.1	1.07	3.39	8.57	0.19	14.6	0.15		95.43			1270
Barnes et al. (2010)	ODP Leg 126, site 782A	782A-14X-2-142-144	782A-14X-2-142-144	Izu volcanic arc	30.861	141.314	glass shards from tephra		3.454	55.39	2.8	0.48	11.29	0.94	3.26	7.27	0.18	13.7	0.12		95.43			1720
Barnes et al. (2010)	ODP Leg 126, site 782A	782A-11X-3-0-1	782A-11X-3-0-1	Izu volcanic arc	30.861	141.314	glass shards from tephra		2.842	51.91	2.59	0.21	11.78	1.14	4.25	8.66	0.22	14.6	0.09		95.45			960
Barnes et al. (2010)	ODP Leg 126, site 782A	782A-14X-2-9-11	782A-14X-2-9-11	Izu volcanic arc	30.861	141.314	glass shards from tephra		3.426	55.46	3.1	0.46	10.35	0.76	3.19	7.4	0.23	14.4	0.1		95.45			1960
Barnes et al. (2010)	ODP Leg 126, site 782A	782A-29X-5-13-15	782A-29X-5-13-15	Izu volcanic arc	30.861	141.314	plagioclase-hosted melt inclusion		11.951	54.42	2.89	0.38	10.47	0.94	3.44	8.03	0.18	14.6	0.11		95.46			1900
Barnes et al. (2010)	ODP Leg 126, site 782A	782A-17X4-0-2	782A-17X-4-0-2	Izu volcanic arc	30.861	141.314	glass shards from tephra		5.031	55.69	3.22	0.32	9.18	1.17	3.35	7.18	0.27	15	0.14		95.52			840
Barnes et al. (2010)	ODP Leg 126, site 782A	782A-13X-3-51-53	782A-13X-3-51-53	Izu volcanic arc	30.861	141.314	glass shards from tephra		3.262	53.99	2.96	0.38	10.55	0.93	3.47	7.74	0.16	15.2	0.14		95.52			1470
Barnes et al. (2010)	ODP Leg 126, site 782A	782A-19X-2-24-26	782A-19X-2-24-26	Izu volcanic arc	30.861	141.314	plagioclase-hosted melt inclusion		6.031	50.72	1.94	0.19	9.9	0.69	5.91	10.53	0.16	15.4	0.09		95.53			545
Barnes et al. (2010)	ODP Leg 126, site 782A	782A-29X-5-13-15	782A-29X-5-13-15	Izu volcanic arc	30.861	141.314	plagioclase-hosted melt inclusion		11.951	56.67	3.11	0.42	9.73	0.97	2.91	7.16	0.15	14.3	0.11		95.53			1600
Barnes et al. (2010)	ODP Leg 126, site 782A	782A-19X-2-24-26	782A-19X-2-24-26	Izu volcanic arc	30.861	141.314	plagioclase-hosted melt inclusion		6.031	52.21	2.06	0.2	10.45	0.67	5.7	9.55	0.29	14.3	0.11		95.54			840
Bryant et al. (2003)	ODP Leg 126, site 782A	782A-39X-1-27-28	782A-39X-1-27-28-27A	Izu volcanic arc	30.861	141.314	glass shard		30.2	54.68	2.34	0.32	13.72	1.17	3.83	9.01	0.25	14.68			95.54
Schindlbeck et al. (2018)	IODP 350, site 1436A	350-U1436A-5H-5-132-134	350-U1436A-5H-5-132-134-16	Izu volcanic arc	32.398	140.365	glass shard	33.08	0.455442	49.75	1.76	0.2538	13.21	1.0216	5.65	11.01	0.2484	12.56	0.0842		95.548					19.89	65.76	9.18	301.15	67.65	119.47	1.01	1.279	273.28	4.88	15.36	2.73	16.64	6.22	2.43	9.78	1.71	11.3	2.57	7.92	1.15	8	1.213	4.28
Barnes et al. (2010)	ODP Leg 126, site 782A	782A-14X-2-9-11	782A-14X-2-9-11	Izu volcanic arc	30.861	141.314	glass shards from tephra		3.426	55.22	2.96	0.4	10.6	0.77	3.24	7.41	0.22	14.7	0.03		95.55			2210
Barnes et al. (2010)	ODP Leg 126, site 782A	782A-17X4-0-2	782A-17X-4-0-2	Izu volcanic arc	30.861	141.314	glass shards from tephra		5.031	55.01	3.18	0.34	9.6	1.06	3.55	7.09	0.27	15.3	0.15		95.55			1230
Barnes et al. (2010)	ODP Leg 126, site 782A	782A-14X-2-9-11	782A-14X-2-9-11	Izu volcanic arc	30.861	141.314	glass shards from tephra		3.426	54.53	3.02	0.43	10.82	0.81	3.47	7.56	0.19	14.6	0.12		95.55			1510
Barnes et al. (2010)	ODP Leg 126, site 782A	782A-21X-2-84-86	782A-21X-2-84-86	Izu volcanic arc	30.861	141.314	plagioclase-hosted melt inclusion		7.227	50.34	1.82	0.28	10.56	0.75	6.72	10.84	0.19	14	0.05		95.55			1030
Barnes et al. (2010)	ODP Leg 126, site 782A	782A-21X-2-50-52	782A-21X-2-50-52	Izu volcanic arc	30.861	141.314	plagioclase-hosted melt inclusion		7.207	52.16	2.02	0.31	12.42	1.09	4.53	8.6	0.26	14.1	0.07		95.56			790
Straub (2003)	ODP Leg 126, site 782A	782A-21X-2-84-86	782A-21X-2-84-86	Izu volcanic arc	30.861	141.314	plagioclase-hosted melt inclusion		7.227	50.34	1.82	0.28	10.56	0.75	6.72	10.84	0.19	14.01	0.05		95.56
Barnes et al. (2010)	ODP Leg 126, site 782A	782A-14X-2-9-11	782A-14X-2-9-11	Izu volcanic arc	30.861	141.314	plagioclase-hosted melt inclusion		3.426	51.69	2.38	0.28	11.18	0.69	4.92	9.29	0.27	14.8	0.07		95.57			660
Barnes et al. (2010)	ODP Leg 126, site 782A	782A-13X-3-51-53	782A-13X-3-51-53	Izu volcanic arc	30.861	141.314	glass shards from tephra		3.262	53.54	2.91	0.43	10.57	0.82	3.93	8.08	0.17	15	0.12		95.57			770
Barnes et al. (2010)	ODP Leg 126, site 782A	782A-2H-6-85-87	782A-2H6-85-87	Izu volcanic arc	30.861	141.314	glass shards from tephra		0.685	54.38	2.04	0.44	9.78	1.01	3.28	9.42	0.1	15	0.12		95.57			720
Barnes et al. (2010)	ODP Leg 126, site 782A	782A-29X-5-13-15	782A-29X-5-13-15	Izu volcanic arc	30.861	141.314	glass shards from tephra		11.951	54.59	2.93	0.37	10.43	1.24	3.14	7.71	0.31	14.73	0.13		95.58			1505
Barnes et al. (2010)	ODP Leg 126, site 782A	782A-14X-2-9-11	782A-14X-2-9-11	Izu volcanic arc	30.861	141.314	glass shards from tephra		3.426	56.25	2.96	0.46	10.59	0.91	2.92	7.12	0.19	14.1	0.08		95.58			2120
Barnes et al. (2010)	ODP Leg 126, site 782A	782A-28X-1-97-99	782A-28X-1-97-99	Izu volcanic arc	30.861	141.314	plagioclase-hosted melt inclusion		11.223	52.43	2.47	0.34	12.76	0.85	4.1	8.92	0.23	13.4	0.09		95.59			700
Schindlbeck et al. (2018)	IODP 350, site 1436A	350-U1436A-4H-5-105-107	350-U1436A-4H-5-105-107-5	Izu volcanic arc	32.398	140.365	glass shard		0.0523716	53.81	2.76	0.2391	11.55	1.0522	3.44	8.2	0.1787	14.3	0.0705		95.6005					7.49	45.42	2.79	160.78	24.03	37.43	0.223	0.407	106.93	1.466	4.88	0.913	5.78	2.51	0.939	3.31	0.556	4.29	0.986	2.55	0.384	2.83	0.462	1.1
Barnes et al. (2010)	ODP Leg 126, site 782A	782A-14X-2-9-11	782A-14X-2-9-11	Izu volcanic arc	30.861	141.314	glass shards from tephra		3.426	56.29	2.87	0.42	10.42	0.85	2.94	7.23	0.26	14.2	0.13		95.61			2100
Barnes et al. (2010)	ODP Leg 126, site 782A	782A-6H-6-55-57	782A-6H-6-55-57	Izu volcanic arc	30.861	141.314	glass shards from tephra		1.925	53.58	2.65	0.4	11.77	1.19	3.42	8.28	0.15	14	0.17		95.61			1730
Barnes et al. (2010)	ODP Leg 126, site 782A	782A-26X-5-147-149	782A-26X-5-147-149	Izu volcanic arc	30.861	141.314	glass shards from tephra		10.45	56.54	3.35	0.55	9.93	0.99	2.68	7.08	0.17	14.2	0.12		95.61			2310
Bryant et al. (2003)	ODP Leg 126, site 782A	782A-39X-1-27-28	782A-39X-1-27-28-27A	Izu volcanic arc	30.861	141.314	glass shard		30.2	55.93	2.85	0.41	11.81	0.99	4.06	8.81	0.15	14.98			95.62
Barnes et al. (2010)	ODP Leg 126, site 782A	782A-13X-3-51-53	782A-13X-3-51-53	Izu volcanic arc	30.861	141.314	glass shards from tephra		3.262	53.85	3.02	0.4	10.59	0.93	3.66	7.82	0.3	14.9	0.15		95.62			1820
Barnes et al. (2010)	ODP Leg 126, site 782A	782A-39X-1-21-23	782A-39X-1-21-23	Izu volcanic arc	30.861	141.314	glass shards from tephra		33.257	54.47	2.53	0.53	10.11	0.71	3.92	8.34	0.2	14.7	0.12		95.63			1260
Barnes et al. (2010)	ODP Leg 126, site 782A	782A-14X-2-142-144	782A-14X-2-142-144	Izu volcanic arc	30.861	141.314	glass shards from tephra		3.454	55.42	2.91	0.47	11.18	0.94	3.33	7.29	0.2	13.8	0.1		95.64			2260
Barnes et al. (2010)	ODP Leg 126, site 782A	782A-39X-1-21-23	782A-39X-1-21-23	Izu volcanic arc	30.861	141.314	plagioclase-hosted melt inclusion		33.257	52.36	2.3	0.34	10.72	0.79	4.69	9.46	0.16	14.7	0.13		95.65			1560
Barnes et al. (2010)	ODP Leg 126, site 782A	782A-29X-5-13-15	782A-29X-5-13-15	Izu volcanic arc	30.861	141.314	plagioclase-hosted melt inclusion		11.951	49.59	1.68	0.19	15.72	1.25	6.7	9.49	0.39	10.6	0.04		95.65			930
Barnes et al. (2010)	ODP Leg 126, site 782A	782A-2H-4-113-114	782A-2H-4-113-114	Izu volcanic arc	30.861	141.314	plagioclase-hosted melt inclusion		0.546	51.95	1.96	0.57	8.61	0.46	6.19	10.7	0.21	14.8	0.2		95.65			910
Barnes et al. (2010)	ODP Leg 126, site 782A	782A-13X-3-51-53	782A-13X-3-51-53	Izu volcanic arc	30.861	141.314	glass shards from tephra		3.262	53.91	2.88	0.36	10.66	0.93	3.67	7.91	0.22	15	0.12		95.66			1850
Barnes et al. (2010)	ODP Leg 126, site 782A	782A-13X-3-51-53	782A-13X-3-51-53	Izu volcanic arc	30.861	141.314	glass shards from tephra		3.262	54.47	2.95	0.41	10.05	0.99	3.58	7.77	0.12	15.2	0.13		95.67			1710
Barnes et al. (2010)	ODP Leg 126, site 782A	782A-25X-4-111-113	782A-25X-4-111-113	Izu volcanic arc	30.861	141.314	glass shards from tephra		9.757	53.77	2.99	0.3	11.6	1.16	3.53	8.28	0.14	13.8	0.11		95.68			1310
Straub (2003)	ODP Leg 126, site 782A	782A-2H-4-113-114	782A-2H-4-113-114	Izu volcanic arc	30.861	141.314	plagioclase-hosted melt inclusion		0.546	51.95	1.96	0.57	8.61	0.46	6.19	10.7	0.21	14.83	0.2		95.68
Barnes et al. (2010)	ODP Leg 126, site 782A	782A-6H-6-55-57	782A-6H-6-55-57	Izu volcanic arc	30.861	141.314	glass shards from tephra		1.925	53.59	2.68	0.39	11.5	1.12	3.62	8.37	0.21	14.1	0.13		95.71			2020
Barnes et al. (2010)	ODP Leg 126, site 782A	782A-17X4-0-2	782A-17X-4-0-2	Izu volcanic arc	30.861	141.314	glass shards from tephra		5.031	55.53	3.2	0.37	9.16	1.04	3.34	7.22	0.25	15.4	0.2		95.71			1300
Barnes et al. (2010)	ODP Leg 126, site 782A	782A-11X-3-0-1	782A-11X-3-0-1	Izu volcanic arc	30.861	141.314	glass shards from tephra		2.842	53.24	2.8	0.18	12.12	1.17	3.92	7.86	0.35	14	0.1		95.74			1100
Barnes et al. (2010)	ODP Leg 126, site 782A	782A-21X-2-50-52	782A-21X-2-50-52	Izu volcanic arc	30.861	141.314	plagioclase-hosted melt inclusion		7.207	51.92	2.46	0.36	13.49	1.17	4.56	8.35	0.27	13	0.16		95.74			1530
Barnes et al. (2010)	ODP Leg 126, site 782A	782A-13X-3-51-53	782A-13X-3-51-53	Izu volcanic arc	30.861	141.314	glass shards from tephra		3.262	54.28	2.83	0.41	10.33	0.95	3.61	7.92	0.26	15	0.15		95.74			1730
Barnes et al. (2010)	ODP Leg 126, site 782A	782A-19X-2-24-26	782A-19X-2-24-26	Izu volcanic arc	30.861	141.314	plagioclase-hosted melt inclusion		6.031	52.03	1.88	0.22	10.25	0.77	5.74	9.97	0.19	14.6	0.1		95.75			700
Barnes et al. (2010)	ODP Leg 126, site 782A	782A-29X-5-13-15	782A-29X-5-13-15	Izu volcanic arc	30.861	141.314	glass shards from tephra		11.951	54.38	2.81	0.38	10.63	0.95	3.63	7.89	0.2	14.76	0.13		95.76			1377
Barnes et al. (2010)	ODP Leg 126, site 782A	782A-6H-6-55-57	782A-6H-6-55-57	Izu volcanic arc	30.861	141.314	glass shards from tephra		1.925	53.6	2.74	0.38	11.5	1.11	3.4	8.4	0.3	14.2	0.13		95.76			1670
Barnes et al. (2010)	ODP Leg 126, site 782A	782A-19X-2-24-26	782A-19X-2-24-26	Izu volcanic arc	30.861	141.314	plagioclase-hosted melt inclusion		6.031	51.52	1.88	0.23	10.62	0.7	5.49	10.09	0.25	14.9	0.11		95.79			770
Barnes et al. (2010)	ODP Leg 126, site 782A	782A-14X-5-14-17	782A-14X-5-14-17	Izu volcanic arc	30.861	141.314	glass shards from tephra		3.52	53.15	2.27	0.32	10.4	0.76	4.95	9.34	0.28	14.2	0.12		95.79			910
Schindlbeck et al. (2018)	IODP 350, site 1436A	350-U1436A-3H-2-25-27	350-U1436A-3H-2-25-27-3	Izu volcanic arc	32.398	140.365	glass shard	12.95	0.207005	52.29	2.39	0.3016	12.13	1.1538	4.32	8.73	0.2043	14.19	0.0887		95.7984					9.02	56.99	5.1	157.12	37.18	59.88	0.624	0.664	131.5	2.76	8.29	1.5	9.86	4.02	1.28	5.25	0.97	6.49	1.421	4.4	0.536	4.01	0.628	1.53
Bryant et al. (2003)	ODP Leg 126, site 782A	782A-39X-1-27-28	782A-39X-1-27-28-27A	Izu rear- arc?	30.861	141.314	glass shard		30.2	55.27	2.7	0.54	12.41	0.94	4.31	9.1	0.18	14.55			95.8						48	9.7	195	22.6	42.7	0.416	0.77	89	3.11	8.29	1.39	7.21	2.28	0.87	3.07		3.92		2.45		2.53		1.44
Barnes et al. (2010)	ODP Leg 126, site 782A	782A-21X-2-84-86	782A-21X-2-84-86	Izu volcanic arc	30.861	141.314	plagioclase-hosted melt inclusion		7.227	50.97	2.06	0.22	11.39	1.02	5.7	10.23	0.15	14	0.06		95.8			300
Barnes et al. (2010)	ODP Leg 126, site 782A	782A-29X-5-13-15	782A-29X-5-13-15	Izu volcanic arc	30.861	141.314	plagioclase-hosted melt inclusion		11.951	55.56	2.74	0.37	11.35	1.15	3.83	7.32	0.25	13.1	0.14		95.81			1430
Barnes et al. (2010)	ODP Leg 126, site 782A	782A-19X-2-24-26	782A-19X-2-24-26	Izu volcanic arc	30.861	141.314	plagioclase-hosted melt inclusion		6.031	52.49	2.06	0.31	10.54	0.63	5.84	9.54	0.13	14.2	0.09		95.83			790
Schindlbeck et al. (2018)	IODP 350, site 1436A	350-U1436A-7H-3-93-95	350-U1436A-7H-3-93-95-2	Izu volcanic arc	32.398	140.365	glass shard	47.04	0.658487	54.48	3.28	0.3178	11.43	1.1908	3.26	7.73	0.1577	13.84	0.1514		95.8377
Barnes et al. (2010)	ODP Leg 126, site 782A	782A-28X-1-97-99	782A-28X-1-97-99	Izu volcanic arc	30.861	141.314	plagioclase-hosted melt inclusion		11.223	52.6	2.65	0.38	12.6	0.94	4.36	7.95	0.24	14	0.12		95.84			655
Barnes et al. (2010)	ODP Leg 126, site 782A	782A-14X-2-9-11	782A-14X-2-9-11	Izu volcanic arc	30.861	141.314	plagioclase-hosted melt inclusion		3.426	51.86	2.41	0.29	10.93	0.74	5.03	9.57	0.21	14.7	0.11		95.85			940
Barnes et al. (2010)	ODP Leg 126, site 782A	782A-29X-5-13-15	782A-29X-5-13-15	Izu volcanic arc	30.861	141.314	glass shards from tephra		11.951	50.71	2.28	0.21	15.04	0.98	4.99	7.86	0.3	13.41	0.08		95.86			1848
Barnes et al. (2010)	ODP Leg 126, site 782A	782A-39X-1-21-23	782A-39X-1-21-23	Izu volcanic arc	30.861	141.314	plagioclase-hosted melt inclusion		33.257	51.58	2.26	0.25	10.53	0.83	5.32	10.15	0.15	14.7	0.1		95.87			840
Barnes et al. (2010)	ODP Leg 126, site 782A	782A-29X-5-13-15	782A-29X-5-13-15	Izu volcanic arc	30.861	141.314	glass shards from tephra		11.951	55.48	2.87	0.43	10.03	0.99	3.41	7.59	0.23	14.73	0.13		95.89			1327
Barnes et al. (2010)	ODP Leg 126, site 782A	782A-37X-4-43-45	782A-37X-4-43-45	Izu volcanic arc	30.861	141.314	glass shards from tephra		29.223	53.36	2.61	0.38	11.89	1.09	3.82	8.28	0.26	14.1	0.1		95.89			740
Barnes et al. (2010)	ODP Leg 126, site 782A	782A-19X-2-24-26	782A-19X-2-24-26	Izu volcanic arc	30.861	141.314	plagioclase-hosted melt inclusion		6.031	51.34	1.87	0.14	9.48	0.48	6.77	11.1	0.16	14.5	0.06		95.9			440
Barnes et al. (2010)	ODP Leg 126, site 782A	782A-21X-2-84-86	782A-21X-2-84-86	Izu volcanic arc	30.861	141.314	glass shards from tephra		7.227	52.68	2.58	0.34	12.53	1.1	4.16	8.81	0.19	13.4	0.13		95.92			1660
Barnes et al. (2010)	ODP Leg 126, site 782A	782A-17X4-0-2	782A-17X-4-0-2	Izu volcanic arc	30.861	141.314	glass shards from tephra		5.031	53.75	2.45	0.34	11.6	0.98	3.81	8.38	0.25	14.26	0.1		95.92			1362
Barnes et al. (2010)	ODP Leg 126, site 782A	782A-29X-5-13-15	782A-29X-5-13-15	Izu volcanic arc	30.861	141.314	plagioclase-hosted melt inclusion		11.951	54.69	2.93	0.35	10.6	1.01	3.56	7.78	0.29	14.6	0.11		95.92			1430
Bryant et al. (2003)	ODP Leg 126, site 782A	782A-39X-1-27-28	782A-39X-1-27-28-27A	Izu volcanic arc	30.861	141.314	glass shard		30.2	55.03	2.58	0.4	12.23	1.01	4.39	9.25	0.23	14.87			95.92
Schindlbeck et al. (2018)	IODP 350, site 1436A	350-U1436A-8H-1-5-7	350-U1436A-8H-1-5-7-5	Izu volcanic arc	32.398	140.365	glass shard	50.45	0.714367	52.98	2.86	0.2931	11.89	1.095	3.94	8.45	0.1415	14.19	0.0805		95.9201
Schindlbeck et al. (2018)	IODP 350, site 1436A	350-U1436A-7H-4-16-18	350-U1436A-7H-4-16-18-8	Izu volcanic arc	32.398	140.365	glass shard	47.77	0.67045	55.37	3.33	0.3676	10.57	1.1383	2.84	7.54	0.2767	14.35	0.1398		95.9224
Schindlbeck et al. (2018)	IODP 350, site 1436A	350-U1436A-7H-4-38-40	350-U1436A-7H-4-38-40-1	Izu volcanic arc	32.398	140.365	glass shard	47.99	0.674055	53.92	3	0.2746	11.61	1.1141	3.48	8.26	0.1747	14.01	0.0836		95.927					9.34	43.64	4.33	144.21	27.1	50.67	0.355	0.627	101.2	2.148	6.83	1.279	7.17	2.71	1.121	3.8	0.653	4.64	1.035	3.17	0.428	3.24	0.45	1.67
Straub and Layne (2003)	ODP Leg 126, site 782A	782A-17X-4-0-2	782A-17X-4-0-2	Izu volcanic arc	30.861	141.314	glass shard		5.03	53.75	2.45	0.35	11.6	0.98	3.81	8.38	0.25	14.26	0.1		95.93	3	156	1362	19.2	6.51
Straub (2003)	ODP Leg 126, site 782A	782A-17X-4-0-2	782A-17X-4-0-2-C2	Izu volcanic arc	30.861	141.314	glass shards from tephra		5.03	53.75	2.45	0.35	11.6	0.98	3.81	8.38	0.25	14.26	0.1		95.93	3	156	1362	19.2	6.51
Straub and Layne (2003)	ODP Leg 126, site 782A	782A-17X-4-0-2	782A-17X-4-0-2	Izu volcanic arc	30.861	141.314	plagioclase-hosted melt inclusion		5.03	53.75	2.45	0.35	11.6	0.98	3.81	8.38	0.25	14.26	0.1		95.93	4.2	156	1362	19.2	6.51
Barnes et al. (2010)	ODP Leg 126, site 782A	782A-29X-5-13-15	782A-29X-5-13-15	Izu volcanic arc	30.861	141.314	glass shards from tephra		11.951	56.64	3.52	0.47	9.38	0.95	3.08	6.97	0.23	14.53	0.16		95.93			1598
Barnes et al. (2010)	ODP Leg 126, site 782A	782A-14X-2-9-11	782A-14X-2-9-11	Izu volcanic arc	30.861	141.314	glass shards from tephra		3.426	56.67	3.01	0.42	10.19	0.8	3.09	7.07	0.21	14.4	0.08		95.94			1490
Bryant et al. (2003)	ODP Leg 126, site 782A	782A-39X-1-27-28	782A-39X-1-27-28-27A	Izu volcanic arc	30.861	141.314	glass shard		30.2	55.63	2.86	0.51	12.5	1.12	3.54	8.43	0.21	15.2			95.94
Barnes et al. (2010)	ODP Leg 126, site 782A	782A-19X-2-24-26	782A-19X-2-24-26	Izu volcanic arc	30.861	141.314	plagioclase-hosted melt inclusion		6.031	50.87	1.87	0.14	10.05	0.56	6.84	11.03	0.29	14.2	0.09		95.94			470
Barnes et al. (2010)	ODP Leg 126, site 782A	782A-39X-1-21-23	782A-39X-1-21-23	Izu volcanic arc	30.861	141.314	glass shards from tephra		33.257	51.37	2.51	0.3	12.55	0.84	4.76	9.28	0.19	14	0.15		95.95			2090
Schindlbeck et al. (2018)	IODP 350, site 1436A	350-U1436A-7H-4-38-40	350-U1436A-7H-4-38-40-6	Izu volcanic arc	32.398	140.365	glass shard	47.99	0.674055	52.33	2.68	0.3167	11.88	0.9209	4.81	8.79	0.2624	13.88	0.0889		95.9589
Barnes et al. (2010)	ODP Leg 126, site 782A	782A-21X-2-50-52	782A-21X-2-50-52	Izu volcanic arc	30.861	141.314	plagioclase-hosted melt inclusion		7.207	52.78	2.58	0.41	13.52	1.14	4.7	7.71	0.22	12.8	0.1		95.96			1000
Barnes et al. (2010)	ODP Leg 126, site 782A	782A-6H-6-55-57	782A-6H-6-55-57	Izu volcanic arc	30.861	141.314	glass shards from tephra		1.925	53.88	2.73	0.39	11.59	1.07	3.47	8.4	0.32	14	0.11		95.96			1280
Barnes et al. (2010)	ODP Leg 126, site 782A	782A-29X-5-13-15	782A-29X-5-13-15	Izu volcanic arc	30.861	141.314	plagioclase-hosted melt inclusion		11.951	49.86	2.19	0.22	14.47	1.09	7.12	8.27	0.3	12.4	0.05		95.97			1980
Barnes et al. (2010)	ODP Leg 126, site 782A	782A-26X-5-147-149	782A-26X-5-147-149	Izu volcanic arc	30.861	141.314	glass shards from tephra		10.45	52.72	2.71	0.25	10.49	1.23	4.04	8.83	0.18	15.3	0.22		95.97			730
Barnes et al. (2010)	ODP Leg 126, site 782A	782A-29X-5-13-15	782A-29X-5-13-15	Izu volcanic arc	30.861	141.314	plagioclase-hosted melt inclusion		11.951	55.36	2.95	0.37	10.8	0.93	3.58	7.62	0.21	14	0.15		95.97			1730
Barnes et al. (2010)	ODP Leg 126, site 782A	782A-14X-2-142-144	782A-14X-2-142-144	Izu volcanic arc	30.861	141.314	glass shards from tephra		3.454	55.33	3	0.44	11.52	1	3.14	7.41	0.16	13.8	0.18		95.98			2380
Straub (2003)	ODP Leg 126, site 782A	782A-29X-5-13-15	782A-29X-5-13-15	Izu volcanic arc	30.861	141.314	plagioclase-hosted melt inclusion		12.01	49.86	2.19	0.22	14.47	1.09	7.12	8.27	0.3	12.42	0.05		95.99
Straub and Layne (2003)	ODP Leg 126, site 782A	782A-29X-5-13-15	782A-29X-5-13-15	Izu volcanic arc	30.861	141.314	plagioclase-hosted melt inclusion		12.1	56.09	3.11	0.41	9.95	1.07	2.95	7.23	0.25	14.81	0.13		96	3.95	187	1353	20	7.5
Straub (2003)	ODP Leg 126, site 782A	782A-29X-5-13-15	782A-29X-5-13-15-13A	Izu volcanic arc	30.861	141.314	plagioclase-hosted melt inclusion		12.1	56.09	3.11	0.41	9.95	1.07	2.95	7.23	0.25	14.81	0.13		96	3.95	187	1353	20	7.5
Straub and Layne (2003)	ODP Leg 126, site 782A	782A-29X-5-13-15	782A-29X-5-13-15	Izu volcanic arc	30.861	141.314	plagioclase-hosted melt inclusion		13.35	56.09	3.11	0.41	9.95	1.07	2.95	7.23	0.25	14.81	0.13		96	4	187	1353	20	7.5
Barnes et al. (2010)	ODP Leg 126, site 782A	782A-39X-1-21-23	782A-39X-1-21-23	Izu volcanic arc	30.861	141.314	glass shards from tephra		33.257	49.39	2.2	0.27	12.85	1.17	5.11	9.87	0.29	14.7	0.15		96			1110
Barnes et al. (2010)	ODP Leg 126, site 782A	782A-13X-3-51-53	782A-13X-3-51-53	Izu volcanic arc	30.861	141.314	glass shards from tephra		3.262	54.56	2.98	0.39	9.96	1.05	3.59	7.99	0.25	15.1	0.14		96.01			1750
Barnes et al. (2010)	ODP Leg 126, site 782A	782A-29X-3-42-46	782A-29X-3-42-46	Izu volcanic arc	30.861	141.314	glass shards from tephra		11.931	55.47	3.21	0.47	10.35	1.02	3.39	7.65	0.23	14.1	0.12		96.01			1550
Barnes et al. (2010)	ODP Leg 126, site 782A	782A-14X-2-142-144	782A-14X-2-142-144	Izu volcanic arc	30.861	141.314	glass shards from tephra		3.454	55.33	2.96	0.44	11.48	0.95	3.27	7.37	0.15	14	0.07		96.02			1880
Straub and Layne (2003)	ODP Leg 126, site 782A	782A-29X-5-13-15	782A-29X-5-13-15	Izu volcanic arc	30.861	141.314	plagioclase-hosted melt inclusion		12.11	56.06	2.95	0.42	9.7	1	3.31	7.43	0.23	14.78	0.14		96.02	3.97	152	1208	18	6.7
Barnes et al. (2010)	ODP Leg 126, site 782A	782A-29X-5-13-15	782A-29X-5-13-15	Izu volcanic arc	30.861	141.314	glass shards from tephra		11.951	56.06	2.95	0.42	9.7	1	3.31	7.43	0.23	14.78	0.14		96.02			1208
Straub (2003)	ODP Leg 126, site 782A	782A-29X-5-13-15	782A-29X-5-13-15-7B	Izu volcanic arc	30.861	141.314	plagioclase-hosted melt inclusion		12.11	56.06	2.95	0.42	9.7	1	3.31	7.43	0.23	14.78	0.14		96.02	3.97	152	1208	18	6.7
Straub and Layne (2003)	ODP Leg 126, site 782A	782A-29X-5-13-15	782A-29X-5-13-15	Izu volcanic arc	30.861	141.314	plagioclase-hosted melt inclusion		13.35	56.06	2.95	0.42	9.7	1	3.31	7.43	0.23	14.78	0.14		96.02	3.98	152	1208	18	6.7
Barnes et al. (2010)	ODP Leg 126, site 782A	782A-19X-2-24-26	782A-19X-2-24-26	Izu volcanic arc	30.861	141.314	plagioclase-hosted melt inclusion		6.031	51.97	1.77	0.22	10.19	0.72	5.85	10.29	0.19	14.7	0.13		96.03			610
Barnes et al. (2010)	ODP Leg 126, site 782A	782A-17X4-0-2	782A-17X-4-0-2	Izu volcanic arc	30.861	141.314	glass shards from tephra		5.031	55.39	3.21	0.27	9.5	1.13	3.48	7.45	0.24	15.2	0.16		96.03			1070
Schindlbeck et al. (2018)	IODP 350, site 1436A	350-U1436A-7H-4-38-40	350-U1436A-7H-4-38-40-13	Izu volcanic arc	32.398	140.365	glass shard	47.99	0.674055	54.23	2.89	0.3322	12.08	1.1224	3.09	8	0.2639	13.96	0.0672		96.0357
Barnes et al. (2010)	ODP Leg 126, site 782A	782A-29X-5-13-15	782A-29X-5-13-15	Izu volcanic arc	30.861	141.314	glass shards from tephra		11.951	56.09	3.11	0.46	9.95	1.07	2.95	7.23	0.25	14.81	0.13		96.05			1353
Barnes et al. (2010)	ODP Leg 126, site 782A	782A-6H-6-55-57	782A-6H-6-55-57	Izu volcanic arc	30.861	141.314	glass shards from tephra		1.925	53.51	2.69	0.39	11.8	1.13	3.45	8.55	0.2	14.2	0.13		96.05			1465
Barnes et al. (2010)	ODP Leg 126, site 782A	782A-23X-6-135-137	782A-23X-6-135-137	Izu volcanic arc	30.861	141.314	glass shards from tephra		8.793	54.1	2.84	0.37	11.25	1.12	3.48	8.33	0.19	14.3	0.09		96.07			1570
Barnes et al. (2010)	ODP Leg 126, site 782A	782A-39X-1-21-23	782A-41X-4-71-73	Izu volcanic arc	30.861	141.314	plagioclase-hosted melt inclusion		39.981	55.47	2.6	0.31	10.08	0.54	4.21	8.2	0.14	14.5	0.02		96.07			1500
Schindlbeck et al. (2018)	IODP 350, site 1436A	350-U1436A-3H-2-98-100	350-U1436A-3H-2-98-100-16	Izu volcanic arc	32.398	140.365	glass shard	12.95	0.207005	56.57	3.39	0.3031	9.55	0.9708	2.83	7.52	0.2384	14.63	0.0767		96.079
Bryant et al. (2003)	ODP Leg 125, Site 786A	786A-5X-1-74-76	786A-5X-1-74-76-2C	Izu volcanic arc	31.88	141.23	glass shard	38.9	5.6	54.37	1.81	0.18	13.5	1.21	4.42	9.56	0.18	14.78			96.08
Barnes et al. (2010)	ODP Leg 126, site 782A	782A-21X-2-84-86	782A-21X-2-84-86	Izu volcanic arc	30.861	141.314	glass shards from tephra		7.227	52.84	2.73	0.29	11.59	0.95	4.04	8.75	0.23	14.6	0.07		96.09			1340
Straub and Layne (2003)	ODP Leg 126, site 782A	782A-17X-4-0-2	782A-17X-4-0-2	Izu volcanic arc	30.861	141.314	glass shard		5.03	53.77	2.47	0.35	11.59	0.94	3.94	8.38	0.28	14.28	0.1		96.1	3.5	161	1458	19.8	6.69
Straub (2003)	ODP Leg 126, site 782A	782A-17X-4-0-2	782A-17X-4-0-2-C2	Izu volcanic arc	30.861	141.314	glass shards from tephra		5.03	53.77	2.47	0.35	11.59	0.94	3.94	8.38	0.28	14.28	0.1		96.1	3.5	161	1458	19.8	6.69
Straub and Layne (2003)	ODP Leg 126, site 782A	782A-17X-4-0-2	782A-17X-4-0-2	Izu volcanic arc	30.861	141.314	plagioclase-hosted melt inclusion		5.03	53.77	2.47	0.35	11.59	0.94	3.94	8.38	0.28	14.28	0.1		96.1	4	161	1458	19.8	6.69
Barnes et al. (2010)	ODP Leg 126, site 782A	782A-19X-2-24-26	782A-19X-2-24-26	Izu volcanic arc	30.861	141.314	plagioclase-hosted melt inclusion		6.031	51.55	1.76	0.17	9.75	0.57	7	10.91	0.26	14	0.13		96.1			330
Barnes et al. (2010)	ODP Leg 126, site 782A	782A-17X4-0-2	782A-17X-4-0-2	Izu volcanic arc	30.861	141.314	glass shards from tephra		5.031	53.77	2.47	0.36	11.59	0.94	3.94	8.38	0.28	14.28	0.1		96.11			1458
Straub (2003)	ODP Leg 126, site 782A	782A-19X-2-24-26	782A-19X-2-24-26	Izu volcanic arc	30.861	141.314	plagioclase-hosted melt inclusion		6.031	51.55	1.76	0.17	9.75	0.57	7	10.91	0.26	14.01	0.13		96.11
Barnes et al. (2010)	ODP Leg 126, site 782A	782A-21X-3-26-27	782A-21X-3-26-27	Izu volcanic arc	30.861	141.314	glass shards from tephra		7.267	49.83	2.35	0.38	14.13	1.31	5.31	9.81	0.24	12.6	0.15		96.11			180
Barnes et al. (2010)	ODP Leg 126, site 782A	782A-6H-6-55-57	782A-6H-6-55-57	Izu volcanic arc	30.861	141.314	glass shards from tephra		1.925	52.56	2.2	0.29	12.21	1.05	4.84	9.34	0.22	13.3	0.1		96.11			1090
Schindlbeck et al. (2018)	IODP 350, site 1436A	350-U1436A-7H-4-16-18	350-U1436A-7H-4-16-18-11	Izu volcanic arc	32.398	140.365	glass shard	47.77	0.67045	53.86	2.62	0.3459	11.67	0.9375	3.75	8.38	0.1845	14.3	0.0775		96.1254
Barnes et al. (2010)	ODP Leg 126, site 782A	782A-37X-4-43-45	782A-37X-4-43-45	Izu volcanic arc	30.861	141.314	glass shards from tephra		29.223	49.97	2.08	0.25	12.86	1.19	4.93	9.67	0.23	14.8	0.16		96.14			900
Barnes et al. (2010)	ODP Leg 126, site 782A	782A-19X-2-24-26	782A-19X-2-24-26	Izu volcanic arc	30.861	141.314	plagioclase-hosted melt inclusion		6.031	51.66	1.84	0.22	10.06	0.67	6.7	9.81	0.22	14.9	0.06		96.14			720
Barnes et al. (2010)	ODP Leg 126, site 782A	782A-19X-2-24-26	782A-19X-2-24-26	Izu volcanic arc	30.861	141.314	plagioclase-hosted melt inclusion		6.031	52.06	1.95	0.12	10.95	0.56	5.76	10.37	0.18	14.1	0.09		96.14			910
Schindlbeck et al. (2018)	IODP 350, site 1436A	350-U1436A-9H-2-78-80	350-U1436A-9H-2-78-80-4	Izu volcanic arc	32.398	140.365	glass shard	56.32	0.810559	51.66	2.47	0.2893	12.69	1.1878	4.8	9.23	0.2419	13.46	0.1136		96.1426
Schindlbeck et al. (2018)	IODP 350, site 1436A	350-U1436A-9H-4-93-94	350-U1436A-9H-4-93-94-11	Izu volcanic arc	32.398	140.365	glass shard	56.64	0.815803	52.64	2.64	0.3521	12.64	1.0937	4.26	8.94	0.2231	13.28	0.0777		96.1466
Barnes et al. (2010)	ODP Leg 126, site 782A	782A-13X-3-51-53	782A-13X-3-51-53	Izu volcanic arc	30.861	141.314	glass shards from tephra		3.262	53.89	2.91	0.39	10.38	0.96	3.72	8.17	0.24	15.3	0.19		96.15			2060
Barnes et al. (2010)	ODP Leg 126, site 782A	782A-17X4-0-2	782A-17X-4-0-2	Izu volcanic arc	30.861	141.314	glass shards from tephra		5.031	55.69	3.23	0.33	9.64	1.13	3.32	7.35	0.21	15.2	0.06		96.16			810
Barnes et al. (2010)	ODP Leg 126, site 782A	782A-17X4-0-2	782A-17X-4-0-2	Izu volcanic arc	30.861	141.314	glass shards from tephra		5.031	56.48	3.37	0.36	9.38	1.11	3.02	7.05	0.14	15.1	0.16		96.17			790
Straub and Layne (2003)	ODP Leg 126, site 782A	782A-29X-5-13-15	782A-29X-5-13-15	Izu volcanic arc	30.861	141.314	plagioclase-hosted melt inclusion		12.1	54.51	2.93	0.38	10.74	0.96	3.71	7.91	0.24	14.65	0.14		96.17	3.86	163	1412	16	6.5
Straub (2003)	ODP Leg 126, site 782A	782A-29X-5-13-15	782A-29X-5-13-15-8B	Izu volcanic arc	30.861	141.314	plagioclase-hosted melt inclusion		12.1	54.51	2.93	0.38	10.74	0.96	3.71	7.91	0.24	14.65	0.14		96.17	3.86	163	1412	16	6.5
Straub and Layne (2003)	ODP Leg 126, site 782A	782A-29X-5-13-15	782A-29X-5-13-15	Izu volcanic arc	30.861	141.314	plagioclase-hosted melt inclusion		13.35	54.51	2.93	0.38	10.74	0.96	3.71	7.91	0.24	14.65	0.14		96.17	3.83	163	1412	16	6.5
Barnes et al. (2010)	ODP Leg 126, site 782A	782A-23X-6-135-137	782A-23X-6-135-137	Izu volcanic arc	30.861	141.314	glass shards from tephra		8.793	54.16	2.86	0.39	11.5	1.08	3.54	8.12	0.22	14.2	0.1		96.17			1740
Bryant et al. (2003)	ODP Leg 126, site 782A	782A-35X-3-53-59	782A-35X-3-53-59-23A	Izu volcanic arc	30.861	141.314	glass shard		16.5	55.5	1.84	0.29	12.77	0.89	4.66	9.91	0.25	13.88			96.17
Barnes et al. (2010)	ODP Leg 126, site 782A	782A-29X-5-13-15	782A-29X-5-13-15	Izu volcanic arc	30.861	141.314	glass shards from tephra		11.951	54.51	2.93	0.39	10.74	0.96	3.71	7.91	0.24	14.65	0.14		96.18			1412
Barnes et al. (2010)	ODP Leg 126, site 782A	782A-17X4-0-2	782A-17X-4-0-2	Izu volcanic arc	30.861	141.314	glass shards from tephra		5.031	54.47	3.06	0.33	10.03	1.14	3.69	7.95	0.23	15.28			96.18
Schindlbeck et al. (2018)	IODP 350, site 1436A	350-U1436A-4H-5-105-107	350-U1436A-4H-5-105-107-3	Izu volcanic arc	32.398	140.365	glass shard		0.0523716	54.47	2.82	0.2141	11.6	1.014	3.44	8.16	0.2051	14.21	0.053		96.1862					6.96	47.83	2.89	161.24	25.5	40.48	0.286	0.37	106.76	1.742	5.09	1.035	6.15	2.69	0.942	3.31	0.643	4.42	1.052	3	0.344	2.87	0.463	1.46
Schindlbeck et al. (2018)	IODP 350, site 1436A	350-U1436A-7H-4-38-40	350-U1436A-7H-4-38-40-2	Izu volcanic arc	32.398	140.365	glass shard	47.99	0.674055	53.05	2.88	0.3309	12.56	1.1093	3.68	8.45	0.2111	13.82	0.1058		96.1971					8.97	44.75	3.81	146.36	29.71	52.42	0.425	0.559	96.1	1.98	6.39	1.234	6.59	3.36	1.053	3.91	0.742	5.19	1.03	3.13	0.531	3.35	0.59	1.6
Barnes et al. (2010)	ODP Leg 126, site 782A	782A-29X-5-13-15	782A-29X-5-13-15	Izu volcanic arc	30.861	141.314	glass shards from tephra		11.951	54.77	2.65	0.43	11.63	1.07	4.21	7.44	0.28	13.58	0.14		96.2			1453
Barnes et al. (2010)	ODP Leg 126, site 782A	782A-17X4-0-2	782A-17X-4-0-2	Izu volcanic arc	30.861	141.314	glass shards from tephra		5.031	56.41	3.35	0.34	9.25	1.1	3.12	7.06	0.14	15.3	0.14		96.21			740
Schindlbeck et al. (2018)	IODP 350, site 1436A	350-U1436A-7H-4-125-127	350-U1436A-7H-4-125-127-11	Izu volcanic arc	32.398	140.365	glass shard	48.86	0.688311	52.07	2.71	0.288	12.91	1.1064	4	8.7	0.2917	14.01	0.1295		96.2156
Barnes et al. (2010)	ODP Leg 126, site 782A	782A-29X-5-13-15	782A-29X-5-13-15	Izu volcanic arc	30.861	141.314	glass shards from tephra		11.951	49.4	1.53	0.19	12.04	0.75	6.35	11.28	0.3	14.26	0.12		96.22			435
Barnes et al. (2010)	ODP Leg 126, site 782A	782A-6H-6-55-57	782A-6H-6-55-57	Izu volcanic arc	30.861	141.314	glass shards from tephra		1.925	53.35	2.8	0.46	11.83	1.15	3.49	8.42	0.29	14.2	0.23		96.22			1320
Barnes et al. (2010)	ODP Leg 126, site 782A	782A-13X-3-51-53	782A-13X-3-51-53	Izu volcanic arc	30.861	141.314	glass shards from tephra		3.262	51.4	1.92	0.19	11.51	0.68	6	10.28	0.21	14	0.05		96.24			720
Barnes et al. (2010)	ODP Leg 126, site 782A	782A-39X-1-21-23	782A-41X-4-71-73	Izu volcanic arc	30.861	141.314	plagioclase-hosted melt inclusion		39.981	54.94	2.55	0.25	10.24	1.08	4.2	8.67	0.18	14	0.13		96.24			370
Barnes et al. (2010)	ODP Leg 126, site 782A	782A-39X-1-21-23	782A-39X-1-21-23	Izu volcanic arc	30.861	141.314	glass shards from tephra		33.257	50.31	2.86	0.65	12.71	1.44	4.47	9.21	0.21	14.2	0.2		96.26			1090
Barnes et al. (2010)	ODP Leg 126, site 782A	782A-13X-3-51-53	782A-13X-3-51-53	Izu volcanic arc	30.861	141.314	glass shards from tephra		3.262	53.63	2.97	0.38	10.95	0.86	3.89	8.08	0.18	15.2	0.12		96.26			1310
Schindlbeck et al. (2018)	IODP 350, site 1436A	350-U1436A-9H-2-78-80	350-U1436A-9H-2-78-80-11	Izu volcanic arc	32.398	140.365	glass shard	56.32	0.810559	52.25	2.52	0.3037	12.09	1.1395	4.85	9.21	0.2005	13.62	0.0936		96.2773
Barnes et al. (2010)	ODP Leg 126, site 782A	782A-14X-2-9-11	782A-14X-2-9-11	Izu volcanic arc	30.861	141.314	glass shards from tephra		3.426	55.97	3.08	0.41	10.43	0.77	3.12	7.52	0.3	14.6	0.08		96.28			2170
Barnes et al. (2010)	ODP Leg 126, site 782A	782A-6H-6-55-57	782A-6H-6-55-57	Izu volcanic arc	30.861	141.314	glass shards from tephra		1.925	54.03	2.49	0.34	11.61	1.15	3.54	8.5	0.24	14.3	0.08		96.28			1210
Barnes et al. (2010)	ODP Leg 126, site 782A	782A-17X4-0-2	782A-17X-4-0-2	Izu volcanic arc	30.861	141.314	glass shards from tephra		5.031	56.42	3.23	0.34	9.75	1.01	3.03	7.21	0.18	14.9	0.21		96.28			1370
Barnes et al. (2010)	ODP Leg 126, site 782A	782A-13X-3-51-53	782A-13X-3-51-53	Izu volcanic arc	30.861	141.314	glass shards from tephra		3.262	53.85	2.81	0.37	10.81	0.95	3.88	7.94	0.17	15.4	0.11		96.29			1260
Barnes et al. (2010)	ODP Leg 126, site 782A	782A-14X-2-142-144	782A-14X-2-142-144	Izu volcanic arc	30.861	141.314	glass shards from tephra		3.454	55.93	2.93	0.41	11.08	0.95	3.24	7.44	0.13	14.1	0.1		96.31			1600
Barnes et al. (2010)	ODP Leg 126, site 782A	782A-29X-5-13-15	782A-29X-5-13-15	Izu volcanic arc	30.861	141.314	glass shards from tephra		11.951	54.2	2.78	0.35	11.13	1.01	3.8	8.05	0.26	14.6	0.13		96.31			1462
Bryant et al. (2003)	ODP Leg 126, site 782A	782A-39X-1-27-28	782A-39X-1-27-28-27A	Izu volcanic arc	30.861	141.314	glass shard		30.2	51.94	2.12	0.33	13.87	1.26	5.07	10.17	0.21	15.04			96.32						55	4.8	177	21.7	29.5	0.232	0.48	48	1.43	4.52	0.84	4.79	1.88	0.79	2.8		3.6		2.39		2.38		1.13
Barnes et al. (2010)	ODP Leg 126, site 782A	782A-19X-2-24-26	782A-19X-2-24-26	Izu volcanic arc	30.861	141.314	plagioclase-hosted melt inclusion		6.031	51.49	1.97	0.15	10.36	0.66	6.62	9.92	0.26	14.8	0.09		96.32			820
Schindlbeck et al. (2018)	IODP 350, site 1436A	350-U1436A-9H-3-9	350-U1436A-9H-3-9-11-8	Izu volcanic arc	32.398	140.365	glass shard	56.64	0.815803	51.76	2.69	0.314	12.83	1.1964	4.49	9.23	0.1393	13.6	0.0732		96.3229
Straub and Layne (2003)	ODP Leg 126, site 782A	782A-29X-5-13-15	782A-29X-5-13-15	Izu volcanic arc	30.861	141.314	plagioclase-hosted melt inclusion		12.1	54.2	2.78	0.37	11.13	1.01	3.8	8.05	0.26	14.6	0.13		96.33	3.76	191	1462	16	6.9
Straub (2003)	ODP Leg 126, site 782A	782A-29X-5-13-15	782A-29X-5-13-15-9A	Izu volcanic arc	30.861	141.314	plagioclase-hosted melt inclusion		12.1	54.2	2.78	0.37	11.13	1.01	3.8	8.05	0.26	14.6	0.13		96.33	3.76	191	1462	16	6.9
Straub and Layne (2003)	ODP Leg 126, site 782A	782A-29X-5-13-15	782A-29X-5-13-15	Izu volcanic arc	30.861	141.314	plagioclase-hosted melt inclusion		13.35	54.2	2.78	0.37	11.13	1.01	3.8	8.05	0.26	14.6	0.13		96.33	3.67	191	1462	16	6.9
Schindlbeck et al. (2018)	IODP 350, site 1436A	350-U1436A-7H-4-38-40	350-U1436A-7H-4-38-40-3	Izu volcanic arc	32.398	140.365	glass shard	47.99	0.674055	53.82	2.68	0.2903	11.59	0.9415	3.96	8.47	0.1775	14.28	0.1251		96.3344					8.72	44.48	4.12	144.93	29.71	53.19	0.516	0.586	101.67	2.22	6.66	1.281	7.44	2.9	1.122	3.9	0.685	5.07	1.098	3.39	0.405	3.57	0.554	1.74
Barnes et al. (2010)	ODP Leg 126, site 782A	782A-14X-2-9-11	782A-14X-2-9-11	Izu volcanic arc	30.861	141.314	glass shards from tephra		3.426	55.31	2.94	0.43	10.6	0.86	3.28	7.85	0.13	14.8	0.14		96.34			1600
Barnes et al. (2010)	ODP Leg 126, site 782A	782A-6H-6-55-57	782A-6H-6-55-57	Izu volcanic arc	30.861	141.314	glass shards from tephra		1.925	54	2.57	0.32	12.03	1.24	3.63	8.79	0.16	13.4	0.2		96.34			1320
Bryant et al. (2003)	ODP Leg 126, site 782A	782A-39X-1-27-28	782A-39X-1-27-28-27A	Izu volcanic arc	30.861	141.314	glass shard		30.2	53.2	2.3	0.34	12.69	0.95	5.29	10.41	0.1	14.73			96.34						54	5.2	159	20.2	32.8	0.377	0.32	54	1.8	5.03	0.97	5.12	1.87	0.73	2.51		3.34		2.21		2.26		1.14
Barnes et al. (2010)	ODP Leg 126, site 782A	782A-21X-5-43-45	782A-21X-5-43-45	Izu volcanic arc	30.861	141.314	glass shards from tephra		7.474	55	2.86	0.34	11.27	1.05	3.45	8.04	0.16	14.1	0.08		96.35			1880
Barnes et al. (2010)	ODP Leg 126, site 782A	782A-39X-1-21-23	782A-39X-1-21-23	Izu volcanic arc	30.861	141.314	plagioclase-hosted melt inclusion		33.257	51.66	2.32	0.41	11.52	0.88	4.88	9.6	0.2	14.8	0.08		96.35			1760
Barnes et al. (2010)	ODP Leg 126, site 782A	782A-11X-3-0-1	782A-11X-3-0-1	Izu volcanic arc	30.861	141.314	glass shards from tephra		2.842	51.74	2.62	0.23	12.86	1.21	4.27	8.58	0.22	14.5	0.13		96.36			880
Barnes et al. (2010)	ODP Leg 126, site 782A	782A-19X-2-24-26	782A-19X-2-24-26	Izu volcanic arc	30.861	141.314	plagioclase-hosted melt inclusion		6.031	51.8	1.91	0.19	10.2	0.67	6.02	10.66	0.2	14.6	0.11		96.36			700
Barnes et al. (2010)	ODP Leg 126, site 782A	782A-17X4-0-2	782A-17X-4-0-2	Izu volcanic arc	30.861	141.314	glass shards from tephra		5.031	55.03	3.07	0.34	9.96	1.13	3.57	7.83	0.17	15.17	0.09		96.36			1337
Schindlbeck et al. (2018)	IODP 350, site 1436A	350-U1436A-7H-4-125-127	350-U1436A-7H-4-125-127-12	Izu volcanic arc	32.398	140.365	glass shard	48.86	0.688311	54.18	2.86	0.3248	12.12	1.0896	3.46	8.04	0.1567	14.02	0.1125		96.3636
Barnes et al. (2010)	ODP Leg 126, site 782A	782A-14X-2-9-11	782A-14X-2-9-11	Izu volcanic arc	30.861	141.314	glass shards from tephra		3.426	56.63	3.08	0.4	10.1	0.82	3.25	7.36	0.16	14.5	0.07		96.37			1840
Barnes et al. (2010)	ODP Leg 126, site 782A	782A-14X-5-14-17	782A-14X-5-14-17	Izu volcanic arc	30.861	141.314	glass shards from tephra		3.52	53.26	2.42	0.26	10.61	0.72	4.98	9.53	0.21	14.3	0.08		96.37			1220
Straub and Layne (2003)	ODP Leg 126, site 782A	782A-17X-4-0-2	782A-17X-4-0-2	Izu volcanic arc	30.861	141.314	glass shard		5.03	55.03	3.07	0.35	9.96	1.13	3.57	7.83	0.17	15.17	0.09		96.37		221	1337	16.5	6.45
Straub (2003)	ODP Leg 126, site 782A	782A-17X-4-0-2	782A-17X-4-0-2-A5	Izu volcanic arc	30.861	141.314	glass shards from tephra		5.03	55.03	3.07	0.35	9.96	1.13	3.57	7.83	0.17	15.17	0.09		96.37		221	1337	16.5	6.45
Straub and Layne (2003)	ODP Leg 126, site 782A	782A-17X-4-0-2	782A-17X-4-0-2	Izu volcanic arc	30.861	141.314	plagioclase-hosted melt inclusion		5.03	55.03	3.07	0.35	9.96	1.13	3.57	7.83	0.17	15.17	0.09		96.37	3.7	221	1337	16.5	6.45
Schindlbeck et al. (2018)	IODP 350, site 1436A	350-U1436A-7H-4-38-40	350-U1436A-7H-4-38-40-7	Izu volcanic arc	32.398	140.365	glass shard	47.99	0.674055	53.65	3	0.3029	12.03	1.1514	3.59	8.33	0.184	14.06	0.0763		96.3746
Barnes et al. (2010)	ODP Leg 126, site 782A	782A-17X4-0-2	782A-17X-4-0-2	Izu volcanic arc	30.861	141.314	glass shards from tephra		5.031	54.99	3.09	0.34	9.91	1.16	3.51	7.83	0.22	15.33			96.38
Barnes et al. (2010)	ODP Leg 126, site 782A	782A-21X-3-26-27	782A-21X-3-26-27	Izu volcanic arc	30.861	141.314	plagioclase-hosted melt inclusion		7.267	50.41	2.33	0.34	14.63	1.23	5.69	8.91	0.22	12.5	0.12		96.38			990
Barnes et al. (2010)	ODP Leg 126, site 782A	782A-29X-5-13-15	782A-29X-5-13-15	Izu volcanic arc	30.861	141.314	glass shards from tephra		11.951	54.73	2.88	0.35	10.88	0.89	3.89	7.73	0.24	14.67	0.12		96.38			1403
Barnes et al. (2010)	ODP Leg 126, site 782A	782A-39X-1-21-23	782A-41X-4-71-73	Izu volcanic arc	30.861	141.314	plagioclase-hosted melt inclusion		39.981	54.48	2.42	0.27	9.73	0.83	4.12	9.57	0	14.8	0.16		96.38			440
Schindlbeck et al. (2018)	IODP 350, site 1436A	350-U1436A-3H-2-25-27	350-U1436A-3H-2-25-27-1	Izu volcanic arc	32.398	140.365	glass shard	12.95	0.207005	53.84	2.8	0.3816	14.08	1.6618	2.93	8	0.2846	12.3	0.1073		96.3853					7.47	43.62	3.7	183.27	30.22	55.35	0.346	0.4	107.98	2.37	7.26	1.263	7.26	3.17	1.206	3.99	0.808	5.19	1.117	3.59	0.503	3.59	0.464	1.9
Barnes et al. (2010)	ODP Leg 126, site 782A	782A-19X-2-24-26	782A-19X-2-24-26	Izu volcanic arc	30.861	141.314	plagioclase-hosted melt inclusion		6.031	51.4	2.03	0.22	10.58	0.77	6.17	10.43	0.23	14.5	0.06		96.39			560
Barnes et al. (2010)	ODP Leg 126, site 782A	782A-6H-6-55-57	782A-6H-6-55-57	Izu volcanic arc	30.861	141.314	plagioclase-hosted melt inclusion		1.925	53.72	2.49	0.37	11.48	1.2	3.46	9.04	0.28	14.2	0.15		96.39			1070
Barnes et al. (2010)	ODP Leg 126, site 782A	782A-14X-5-14-17	782A-14X-5-14-17	Izu volcanic arc	30.861	141.314	plagioclase-hosted melt inclusion		3.52	53.35	2.19	0.3	10.94	0.62	5.08	9.59	0.23	14	0.09		96.39			1070
Schindlbeck et al. (2018)	IODP 350, site 1436A	350-U1436A-9H-4-10-12	350-U1436A-9H-4-10-12-9	Izu volcanic arc	32.398	140.365	glass shard	56.64	0.815803	51.53	3.14	0.3241	12.66	1.3548	4.71	9.14	0.227	13.22	0.0927		96.3986					8.65	49.49	4.49	159.15	28.71	49.08	0.481	0.524	97.92	2.3	7.35	1.307	8.22	2.79	1.143	3.8	0.701	4.87	1.186	3.17	0.524	3.43	0.453	1.65
Schindlbeck et al. (2018)	IODP 350, site 1436A	350-U1436A-7H-4-38-40	350-U1436A-7H-4-38-40-12	Izu volcanic arc	32.398	140.365	glass shard	47.99	0.674055	53.45	2.7	0.2854	12.57	1.179	4.32	8.28	0.1787	13.36	0.0764		96.3995
Straub and Layne (2003)	ODP Leg 126, site 782A	782A-17X-4-0-2	782A-17X-4-0-2	Izu volcanic arc	30.861	141.314	glass shard		5.03	55.04	3.07	0.33	9.98	1.15	3.52	7.77	0.18	15.22	0.14		96.4		254	1027	16.5	6.47
Straub (2003)	ODP Leg 126, site 782A	782A-17X-4-0-2	782A-17X-4-0-2-B4	Izu volcanic arc	30.861	141.314	glass shards from tephra		5.03	55.04	3.07	0.33	9.98	1.15	3.52	7.77	0.18	15.22	0.14		96.4		254	1027	16.5	6.47
Straub and Layne (2003)	ODP Leg 126, site 782A	782A-17X-4-0-2	782A-17X-4-0-2	Izu volcanic arc	30.861	141.314	plagioclase-hosted melt inclusion		5.03	55.04	3.07	0.33	9.98	1.15	3.52	7.77	0.18	15.22	0.14		96.4	3.7	254	1027	16.5	6.47
Barnes et al. (2010)	ODP Leg 126, site 782A	782A-27X-2-30-32	782A-27X-2-30-32	Izu volcanic arc	30.861	141.314	glass shards from tephra		10.693	52.91	2.5	0.34	11.89	0.93	4.86	8.58	0.24	14	0.16		96.41			480
Barnes et al. (2010)	ODP Leg 126, site 782A	782A-19X-2-24-26	782A-19X-2-24-26	Izu volcanic arc	30.861	141.314	glass shards from tephra		6.031	52.84	2.42	0.26	10.6	0.82	4.74	9.3	0.26	15.1	0.08		96.42			790
Barnes et al. (2010)	ODP Leg 126, site 782A	782A-17X4-0-2	782A-17X-4-0-2	Izu volcanic arc	30.861	141.314	glass shards from tephra		5.031	55.04	3.07	0.35	9.98	1.15	3.52	7.77	0.18	15.22	0.14		96.42			1027
Barnes et al. (2010)	ODP Leg 126, site 782A	782A-14X-2-9-11	782A-14X-2-9-11	Izu volcanic arc	30.861	141.314	glass shards from tephra		3.426	53.4	2.45	0.33	10.77	0.83	4.92	9.03	0.17	14.4	0.12		96.42			1060
Kutterholf et al. (2018)	IODP 352, site U1440A	352-U1440A-4H-6-96-98	352-U1440A-4H-6_96-98 average	Izu volcanic arc	28.45	142.65	glass shard	31.18	2.39647	54.2437	3.30089	0.595068	12.3573	1.2127	3.987	8.91236	0.244447	15.01	0.136419		96.4232
Barnes et al. (2010)	ODP Leg 126, site 782A	782A-19X-2-24-26	782A-19X-2-24-26	Izu volcanic arc	30.861	141.314	plagioclase-hosted melt inclusion		6.031	53.24	2.4	0.3	11.18	0.67	4.91	9.19	0.25	14.2	0.1		96.44			630
Barnes et al. (2010)	ODP Leg 126, site 782A	782A-19X-2-24-26	782A-19X-2-24-26	Izu volcanic arc	30.861	141.314	plagioclase-hosted melt inclusion		6.031	53.91	2.35	0.28	10.25	0.72	4.55	9.54	0.16	14.6	0.09		96.45			610
Schindlbeck et al. (2018)	IODP 350, site 1436A	350-U1436A-4H-5-105-107	350-U1436A-4H-5-105-107-15	Izu volcanic arc	32.398	140.365	glass shard		0.0523716	54.91	3.03	0.2393	11.3	1.0084	3.03	8.13	0.1828	14.58	0.041		96.4515
Barnes et al. (2010)	ODP Leg 126, site 782A	782A-23X-6-135-137	782A-23X-6-135-137	Izu volcanic arc	30.861	141.314	glass shards from tephra		8.793	52.69	2.71	0.39	13.05	1.14	3.88	8.6	0.26	13.6	0.14		96.46			1610
Barnes et al. (2010)	ODP Leg 126, site 782A	782A-21X-2-84-86	782A-21X-2-84-86	Izu volcanic arc	30.861	141.314	glass shards from tephra		7.227	50.81	1.67	0.11	10.42	0.54	6.63	10.88	0.22	15.13	0.07		96.48			963
Barnes et al. (2010)	ODP Leg 126, site 782A	782A-21X-3-26-27	782A-21X-3-26-27	Izu volcanic arc	30.861	141.314	plagioclase-hosted melt inclusion		7.267	49.72	2.41	0.3	13.84	1.32	5.27	9.31	0.3	13.9	0.11		96.48			860
Barnes et al. (2010)	ODP Leg 126, site 782A	782A-14X-2-9-11	782A-14X-2-9-11	Izu volcanic arc	30.861	141.314	glass shards from tephra		3.426	55.47	2.93	0.46	10.79	0.87	3.41	7.65	0.07	14.7	0.13		96.48			1980
Barnes et al. (2010)	ODP Leg 126, site 782A	782A-17X4-0-2	782A-17X-4-0-2	Izu volcanic arc	30.861	141.314	plagioclase-hosted melt inclusion		5.031	56.14	3.4	0.37	9.52	1.22	3.18	7.03	0.22	15.2	0.2		96.48			560
Barnes et al. (2010)	ODP Leg 126, site 782A	782A-6H-6-55-57	782A-6H-6-55-57	Izu volcanic arc	30.861	141.314	glass shards from tephra		1.925	53.11	2.57	0.35	10.12	0.9	4.02	9.81	0.3	15.2	0.1		96.48			1050
Schindlbeck et al. (2018)	IODP 350, site 1436A	350-U1436A-9H-2-78-80	350-U1436A-9H-2-78-80-3	Izu volcanic arc	32.398	140.365	glass shard	56.32	0.810559	52.15	2.52	0.2927	12.05	1.1609	4.78	9.11	0.1944	14.1	0.1223		96.4803
Barnes et al. (2010)	ODP Leg 126, site 782A	782A-21X-5-43-45	782A-21X-5-43-45	Izu volcanic arc	30.861	141.314	glass shards from tephra		7.474	53.83	2.86	0.43	12.41	1.13	3.61	8.09	0.19	13.8	0.14		96.49			1590
Barnes et al. (2010)	ODP Leg 126, site 782A	782A-13X-3-51-53	782A-13X-3-51-53	Izu volcanic arc	30.861	141.314	glass shards from tephra		3.262	56.43	3.09	0.34	10.78	0.9	3.05	7.08	0.17	14.5	0.15		96.49			2040
Barnes et al. (2010)	ODP Leg 126, site 782A	782A-23X-6-135-137	782A-23X-6-135-137	Izu volcanic arc	30.861	141.314	glass shards from tephra		8.793	55.35	3.19	0.44	11.23	1.09	3.08	7.65	0.28	14	0.18		96.49			1950
Barnes et al. (2010)	ODP Leg 126, site 782A	782A-19X-2-24-26	782A-19X-2-24-26	Izu volcanic arc	30.861	141.314	plagioclase-hosted melt inclusion		6.031	52.19	2.12	0.22	10.93	0.74	6.12	9.62	0.21	14.3	0.05		96.5			1400
Schindlbeck et al. (2018)	IODP 350, site 1436A	350-U1436A-7H-4-16-18	350-U1436A-7H-4-16-18-13	Izu volcanic arc	32.398	140.365	glass shard	47.77	0.67045	54.42	2.85	0.3077	11.65	1.1416	3.55	8.16	0.2167	14.15	0.0585		96.5045
Barnes et al. (2010)	ODP Leg 126, site 782A	782A-14X-2-142-144	782A-14X-2-142-144	Izu volcanic arc	30.861	141.314	glass shards from tephra		3.454	55.31	2.93	0.45	11.43	1.02	3.25	7.49	0.18	14.3	0.17		96.53			970
Barnes et al. (2010)	ODP Leg 126, site 782A	782A-21X-2-84-86	782A-21X-2-84-86	Izu volcanic arc	30.861	141.314	glass shards from tephra		7.227	53.42	2.39	0.31	9.6	0.54	3.9	10.15	0.22	15.91	0.09		96.53			783
Schindlbeck et al. (2018)	IODP 350, site 1436A	350-U1436A-12F-2-10-12	350-U1436A-12F-2-10-12-11	Izu volcanic arc	32.398	140.365	glass shard	64.4	0.942966	53.1	2.67	0.2218	12.58	1.0875	4.14	8.71	0.1811	13.76	0.0866		96.537
Bryant et al. (2003)	ODP Leg 126, site 782A	782A-35X-6-130-136	782A-35X-6-130-136-24A	Izu volcanic arc	30.861	141.314	glass shard		24	55.46	2.56	0.47	12.79	1.01	3.86	8.7	0.28	14.87			96.54
Schindlbeck et al. (2018)	IODP 350, site 1436A	350-U1436A-9H-4-93-94	350-U1436A-9H-4-93-94-7	Izu volcanic arc	32.398	140.365	glass shard	56.64	0.815803	51.62	2.37	0.373	13.69	1.2496	4.57	9.25	0.2515	13.08	0.0912		96.5453
Barnes et al. (2010)	ODP Leg 126, site 782A	782A-19X-2-24-26	782A-19X-2-24-26	Izu volcanic arc	30.861	141.314	plagioclase-hosted melt inclusion		6.031	51.77	1.91	0.17	10.32	0.61	6.66	9.82	0.34	14.9	0.05		96.55			930
Barnes et al. (2010)	ODP Leg 126, site 782A	782A-39X-1-21-23	782A-41X-4-71-73	Izu volcanic arc	30.861	141.314	glass shards from tephra		39.981	54.03	2.52	0.25	10.74	1.01	4.37	8.84	0.26	14.4	0.13		96.55			750
Schindlbeck et al. (2018)	IODP 350, site 1436A	350-U1436A-7H-4-16-18	350-U1436A-7H-4-16-18-3	Izu volcanic arc	32.398	140.365	glass shard	47.77	0.67045	56.01	3.08	0.3519	10.82	1.1912	3.04	7.55	0.2423	14.21	0.063		96.5584					9.11	39.76	4.47	157.01	29.91	52.69	0.394	0.548	99.83	2.34	7.18	1.334	8.28	3.31	1.173	4.05	0.822	5.77	1.207	3.5	0.445	3.59	0.467	1.69
Barnes et al. (2010)	ODP Leg 126, site 782A	782A-23X-6-135-137	782A-23X-6-135-137	Izu volcanic arc	30.861	141.314	glass shards from tephra		8.793	54.22	2.93	0.35	11.52	1.1	3.61	8.43	0.28	14	0.12		96.56			1220
Barnes et al. (2010)	ODP Leg 126, site 782A	782A-17X4-0-2	782A-17X-4-0-2	Izu volcanic arc	30.861	141.314	glass shards from tephra		5.031	55.68	3.25	0.28	9.31	1.17	3.45	7.52	0.15	15.6	0.16		96.57			1070
Schindlbeck et al. (2018)	IODP 350, site 1436A	350-U1436A-9H-2-78-80	350-U1436A-9H-2-78-80-8	Izu volcanic arc	32.398	140.365	glass shard	56.32	0.810559	52.14	2.67	0.3092	13.27	1.2513	4.49	8.72	0.1756	13.47	0.0782		96.5743
Barnes et al. (2010)	ODP Leg 126, site 782A	782A-14X-5-14-17	782A-14X-5-14-17	Izu volcanic arc	30.861	141.314	glass shards from tephra		3.52	53.4	2.38	0.34	10.7	0.69	4.76	9.46	0.21	14.6	0.04		96.58			960
Barnes et al. (2010)	ODP Leg 126, site 782A	782A-21X-2-50-52	782A-21X-2-50-52	Izu volcanic arc	30.861	141.314	plagioclase-hosted melt inclusion		7.207	52.96	2.65	0.34	9.61	0.68	3.58	9.65	0.26	16.8	0.05		96.58			740
Schindlbeck et al. (2018)	IODP 350, site 1436A	350-U1436A-2H-1-25-27	350-U1436A-2H-1-25-27-4	Izu volcanic arc	32.398	140.365	glass shard	4.55	0.088	49.25	1.72	0.1878	13.93	1.0624	6.1	11.09	0.2848	12.89	0.067		96.582
Barnes et al. (2010)	ODP Leg 126, site 782A	782A-29X-5-13-15	782A-29X-5-13-15	Izu volcanic arc	30.861	141.314	glass shards from tephra		11.951	56.11	2.98	0.42	9.82	0.99	3.34	7.61	0.22	14.96	0.14		96.59			1322
Barnes et al. (2010)	ODP Leg 126, site 782A	782A-6H-6-55-57	782A-6H-6-55-57	Izu volcanic arc	30.861	141.314	glass shards from tephra		1.925	52.44	2.3	0.29	11.42	0.99	4.34	9.87	0.27	14.6	0.08		96.6			1040
Barnes et al. (2010)	ODP Leg 126, site 782A	782A-14X-2-142-144	782A-14X-2-142-144	Izu volcanic arc	30.861	141.314	glass shards from tephra		3.454	55.99	3.02	0.43	11.21	0.99	3.27	7.22	0.19	14.2	0.08		96.6			1960
Barnes et al. (2010)	ODP Leg 126, site 782A	782A-39X-1-21-23	782A-39X-1-21-23	Izu volcanic arc	30.861	141.314	glass shards from tephra		33.257	54.49	3.01	0.43	11.43	1.05	3.39	8.14	0.13	14.4	0.13		96.6			1700
Bryant et al. (2003)	ODP Leg 125, Site 786A	786A-5X-1-74-76	786A-5X-1-74-76-2C	Izu volcanic arc	31.88	141.23	glass shard	38.9	5.6	55	2.85	0.25	13.16	1.25	3.91	8.83	0.17	14.6			96.6
Schindlbeck et al. (2018)	IODP 350, site 1436A	350-U1436A-7H-4-38-40	350-U1436A-7H-4-38-40-10	Izu volcanic arc	32.398	140.365	glass shard	47.99	0.674055	53.76	3.04	0.3174	12.23	1.1708	3.54	8.18	0.2447	14.03	0.0922		96.6051
Schindlbeck et al. (2018)	IODP 350, site 1436A	350-U1436A-7H-4-125-127	350-U1436A-7H-4-125-127-13	Izu volcanic arc	32.398	140.365	glass shard	48.86	0.688311	56.08	3.14	0.3228	11.25	1.0707	2.6	7.41	0.233	14.39	0.1112		96.6077
Schindlbeck et al. (2018)	IODP 350, site 1436A	350-U1436A-9H-2-78-80	350-U1436A-9H-2-78-80-13	Izu volcanic arc	32.398	140.365	glass shard	56.32	0.810559	51.99	2.68	0.2901	12.77	1.1753	4.71	9.16	0.2168	13.52	0.0968		96.609
Barnes et al. (2010)	ODP Leg 126, site 782A	782A-17X4-0-2	782A-17X-4-0-2	Izu volcanic arc	30.861	141.314	glass shards from tephra		5.031	54.82	3.12	0.36	10.05	1.16	3.6	7.87	0.18	15.3	0.15		96.61			1030
Barnes et al. (2010)	ODP Leg 126, site 782A	782A-11X-3-0-1	782A-11X-3-0-1	Izu volcanic arc	30.861	141.314	glass shards from tephra		2.842	56.42	3.21	0.23	10.11	1.05	3.3	7.31	0.3	14.6	0.09		96.62			1420
Barnes et al. (2010)	ODP Leg 126, site 782A	782A-19X-2-24-26	782A-19X-2-24-26	Izu volcanic arc	30.861	141.314	plagioclase-hosted melt inclusion		6.031	51.88	2.15	0.27	11.1	0.73	5.71	9.98	0.22	14.48	0.1		96.62			932
Schindlbeck et al. (2018)	IODP 350, site 1436A	350-U1436A-5H-3-19-21	350-U1436A-5H-3-19-21-9	Izu volcanic arc	32.398	140.365	glass shard	28.7	0.402073	55.43	2.76	0.3365	12.01	1.1018	3.52	7.8	0.2559	13.35	0.0594		96.6236
Bryant et al. (2003)	ODP Leg 126, site 782A	782A-35X-6-130-136	782A-35X-6-130-136-24A	Izu volcanic arc	30.861	141.314	glass shard		24	55.58	2.73	0.52	12.62	0.96	3.76	8.6	0.25	14.98			96.63
Barnes et al. (2010)	ODP Leg 126, site 782A	782A-6H-6-55-57	782A-6H-6-55-57	Izu volcanic arc	30.861	141.314	glass shards from tephra		1.925	55.24	2.65	0.36	10.93	1.05	3.3	8.46	0.23	14.3	0.12		96.64			2420
Schindlbeck et al. (2018)	IODP 350, site 1436A	350-U1436A-7H-4-16-18	350-U1436A-7H-4-16-18-5	Izu volcanic arc	32.398	140.365	glass shard	47.77	0.67045	54.56	3.29	0.3539	11.64	1.2175	3.36	7.85	0.2347	14.03	0.1075		96.6436					9.78	37.15	9.51	152.82	23.04	46.94	1.329	1.032	100.41	2.195	6.05	1.169	6.06	2.51	0.798	2.76	0.569	3.81	0.847	2.5	0.372	2.65	0.379	1.58
Barnes et al. (2010)	ODP Leg 126, site 782A	782A-14X-2-142-144	782A-14X-2-142-144	Izu volcanic arc	30.861	141.314	glass shards from tephra		3.454	55.15	2.86	0.39	11.93	0.94	3.55	7.62	0.14	14	0.09		96.67			1930
Barnes et al. (2010)	ODP Leg 126, site 782A	782A-19X-2-24-26	782A-19X-2-24-26	Izu volcanic arc	30.861	141.314	plagioclase-hosted melt inclusion		6.031	51.82	1.96	0.24	10.87	0.75	6.22	10.45	0.26	14	0.1		96.67			720
Barnes et al. (2010)	ODP Leg 126, site 782A	782A-6H-6-55-57	782A-6H-6-55-57	Izu volcanic arc	30.861	141.314	glass shards from tephra		1.925	54.03	2.76	0.41	11.61	1.14	3.46	8.47	0.17	14.5	0.13		96.68			1290
Barnes et al. (2010)	ODP Leg 126, site 782A	782A-17X-1-56-58	782A-17X-1-56-58	Izu volcanic arc	30.861	141.314	glass shards from tephra		4.793	56.19	3	0.39	10.44	1	3.29	7.63	0.25	14.4	0.1		96.69			1470
Barnes et al. (2010)	ODP Leg 126, site 782A	782A-1H-3-129-130	782A-1H-3-129-130	Izu volcanic arc	30.861	141.314	glass shards from tephra		0.114	55.99	2.93	0.25	11.02	1.14	2.99	7.4	0.22	14.6	0.16		96.7			1300
Barnes et al. (2010)	ODP Leg 126, site 782A	782A-6H-6-55-57	782A-6H-6-55-57	Izu volcanic arc	30.861	141.314	glass shards from tephra		1.925	54.96	2.9	0.42	11.26	1.11	3.12	8.21	0.2	14.4	0.12		96.7			1770
Bryant et al. (2003)	ODP Leg 126, site 782A	782A-37X-2-100-106	782A-37X-2-100-106-26A	Izu volcanic arc	30.861	141.314	glass shard		28.5	55.31	2.7	0.36	12.23	0.97	3.98	9.14	0.09	15.22			96.71
Barnes et al. (2010)	ODP Leg 126, site 782A	782A-39X-1-21-23	782A-39X-1-21-23	Izu volcanic arc	30.861	141.314	plagioclase-hosted melt inclusion		33.257	50.2	1.71	0.28	11.62	0.93	6.04	10.93	0.21	14.69	0.1		96.71			697
Barnes et al. (2010)	ODP Leg 126, site 782A	782A-21X-2-50-52	782A-21X-2-50-52	Izu volcanic arc	30.861	141.314	glass shards from tephra		7.207	52.71	2.65	0.36	12.86	1.14	4.21	8.58	0.23	13.9	0.08		96.72			1090
Barnes et al. (2010)	ODP Leg 126, site 782A	782A-29X-5-13-15	782A-29X-5-13-15	Izu volcanic arc	30.861	141.314	glass shards from tephra		11.951	54.95	2.75	0.39	11.74	1.04	4.19	7.55	0.22	13.76	0.13		96.72			1473
Schindlbeck et al. (2018)	IODP 350, site 1436A	350-U1436A-9H-4-67-69	350-U1436A-9H-4-67-69-15	Izu volcanic arc	32.398	140.365	glass shard	56.64	0.815803	53	2.52	0.3683	13.27	1.3258	4.02	8.86	0.2539	13.03	0.0751		96.7231
Schindlbeck et al. (2018)	IODP 350, site 1436A	350-U1436A-4H-4-63-65	350-U1436A-4H-4-63-65-4	Izu volcanic arc	32.398	140.365	glass shard	21.93	0.319582	53.69	2.77	0.2574	11.61	1.1819	3.89	8.7	0.2878	14.27	0.0668		96.7239
Barnes et al. (2010)	ODP Leg 126, site 782A	782A-25X-4-111-113	782A-25X-4-111-113	Izu volcanic arc	30.861	141.314	glass shards from tephra		9.757	50.56	1.92	0.23	11.26	0.78	6.67	11.09	0.16	14	0.06		96.73			630
Barnes et al. (2010)	ODP Leg 126, site 782A	782A-29X-3-9-11	782A-29X-3-9-11	Izu volcanic arc	30.861	141.314	glass shards from tephra		11.514	51.34	2.18	0.24	12.65	1.05	5.34	9.96	0.13	13.7	0.14		96.73			420
Barnes et al. (2010)	ODP Leg 126, site 782A	782A-17X4-0-2	782A-17X-4-0-2	Izu volcanic arc	30.861	141.314	glass shards from tephra		5.031	55.53	3.19	0.34	10.07	1.16	3.44	7.33	0.35	15.2	0.13		96.74			950
Schindlbeck et al. (2018)	IODP 350, site 1436A	350-U1436A-3H-2-25-27	350-U1436A-3H-2-25-27-9	Izu volcanic arc	32.398	140.365	glass shard	12.95	0.207005	55.85	3.12	0.3641	11.3	1.2278	2.86	7.72	0.2699	13.91	0.122		96.7438
Schindlbeck et al. (2018)	IODP 350, site 1436A	350-U1436A-9H-4-67-69	350-U1436A-9H-4-67-69-10	Izu volcanic arc	32.398	140.365	glass shard	56.64	0.815803	51.86	2.64	0.3111	13.38	1.1851	4.66	9.1	0.17	13.34	0.0994		96.7456					2.67253	17.6429	1.60561	52.344	8.56045	15.889	0.133627	0.235517	31.1308	0.666045	2.27374	0.421759	2.4366	0.968793	0.321539	1.16506	0.216726	1.52418	0.329891	1.00846	0.130495	0.977144	0.14678	0.645166
Barnes et al. (2010)	ODP Leg 126, site 782A	782A-13X-3-51-53	782A-13X-3-51-53	Izu volcanic arc	30.861	141.314	glass shards from tephra		3.262	54.97	3.02	0.37	10.53	0.97	3.5	7.78	0.2	15.3	0.11		96.75			1810
Schindlbeck et al. (2018)	IODP 350, site 1436A	350-U1436A-7H-4-125-127	350-U1436A-7H-4-125-127-2	Izu volcanic arc	32.398	140.365	glass shard	48.86	0.688311	53.9	2.68	0.3249	11.38	0.9811	4.13	8.78	0.1784	14.34	0.0645		96.7589					6.2	35.29	3.27	144.68	22.15	40.17	0.313	0.437	83.66	1.83	5.25	0.971	5.32	2.05	0.821	3.24	0.57	4.13	0.839	2.48	0.318	2.47	0.302	1.11
Barnes et al. (2010)	ODP Leg 126, site 782A	782A-11X-1-55-57	782A-11X-1-55-57	Izu volcanic arc	30.861	141.314	glass shards from tephra		2.789	55.17	3	0.39	11.41	1.09	3.18	7.96	0.15	14.3	0.11		96.76			2000
Barnes et al. (2010)	ODP Leg 126, site 782A	782A-19X-2-24-26	782A-19X-2-24-26	Izu volcanic arc	30.861	141.314	glass shards from tephra		6.031	52.78	2.18	0.25	10.62	0.77	5.4	9.74	0.2	14.7	0.13		96.77			1330
Bryant et al. (2003)	ODP Leg 126, site 782A	782A-35X-3-53-59	782A-35X-3-53-59-23A	Izu volcanic arc	30.861	141.314	glass shard		16.5	56.06	2.59	0.62	10.24	0.8	4.83	9.24	0.22	15.39			96.77
Schindlbeck et al. (2018)	IODP 350, site 1436A	350-U1436A-4H-5-105-107	350-U1436A-4H-5-105-107-6	Izu volcanic arc	32.398	140.365	glass shard		0.0523716	54.38	2.73	0.2268	11.73	1.0544	3.43	8.33	0.2724	14.55	0.0808		96.7844
Barnes et al. (2010)	ODP Leg 126, site 782A	782A-11X-3-0-1	782A-11X-3-0-1	Izu volcanic arc	30.861	141.314	glass shards from tephra		2.842	53.3	2.78	0.17	11.97	1.16	4.02	8.47	0.16	14.7	0.06		96.79			2080
Barnes et al. (2010)	ODP Leg 126, site 782A	782A-21X-2-84-86	782A-21X-2-84-86	Izu volcanic arc	30.861	141.314	glass shards from tephra		7.227	52.85	2.38	0.33	9.77	0.41	4.08	10.5	0.13	16.25	0.09		96.79			773
Schindlbeck et al. (2018)	IODP 350, site 1436A	350-U1436A-7H-4-16-18	350-U1436A-7H-4-16-18-1	Izu volcanic arc	32.398	140.365	glass shard	47.77	0.67045	54.76	2.86	0.3075	11.83	1.1438	3.46	8.25	0.1827	13.94	0.0573		96.7913					18.11	77.15	13.28	200.03	30.03	82.95	0.92	0.73	106.09	2.24	7.64	1.45	8.51	2.97	1.27	4.23	0.61	5.78	1.04	3.44	0.358	2.78	0.39	2.78
Schindlbeck et al. (2018)	IODP 350, site 1436A	350-U1436A-9H-4-75-77	350-U1436A-9H-4-75-77-10	Izu volcanic arc	32.398	140.365	glass shard	56.64	0.815803	52.19	3.08	0.3267	12.17	1.3215	4.11	8.7	0.2486	14.53	0.1203		96.7971
Schindlbeck et al. (2018)	IODP 350, site 1436A	350-U1436A-7H-3-93-95	350-U1436A-7H-3-93-95-13	Izu volcanic arc	32.398	140.365	glass shard	47.04	0.658487	51.27	2.69	0.2481	15.18	1.5096	4.04	8.48	0.2368	13.08	0.0652		96.7997
Schindlbeck et al. (2018)	IODP 350, site 1436A	350-U1436A-1H-2-91-93	350-U1436A-1H-2-91-93-7	Izu volcanic arc	32.398	140.365	glass shard	2.41	0.0438292	51.69	2.38	0.2485	14.33	1.0512	4.24	9.42	0.32	13.04	0.0803		96.8
Barnes et al. (2010)	ODP Leg 126, site 782A	782A-25X-4-111-113	782A-25X-4-111-113	Izu volcanic arc	30.861	141.314	glass shards from tephra		9.757	55.57	3.03	0.17	11.02	1.09	3.32	7.99	0.21	14.3	0.1		96.8			2280
Straub and Layne (2003)	ODP Leg 126, site 782A	782A-39-X-1-21-23	782A-39-X-1-21-23	Izu volcanic arc	30.861	141.314	plagioclase-hosted melt inclusion		29.61	51.27	2.11	0.28	13.21	0.98	5.69	9.41	0.28	13.47	0.1		96.8	3.2	198	1313	14	6.7
Straub and Layne (2003)	ODP Leg 126, site 782A	782A-39X-1-21-23	782A-39X-1-21-23	Izu volcanic arc	30.861	141.314	plagioclase-hosted melt inclusion		29.6	51.27	2.11	0.28	13.21	0.98	5.69	9.41	0.28	13.47	0.1		96.8	3.39	198	1313	14	6.7
Straub (2003)	ODP Leg 126, site 782A	782A-39X-1-21-23	782A-39X-1-21-23-5B	Izu volcanic arc	30.861	141.314	plagioclase-hosted melt inclusion		29.6	51.27	2.11	0.28	13.21	0.98	5.69	9.41	0.28	13.47	0.1		96.8	3.39	198	1313	14	6.7
Barnes et al. (2010)	ODP Leg 126, site 782A	782A-39X-1-21-23	782A-39X-1-21-23	Izu volcanic arc	30.861	141.314	plagioclase-hosted melt inclusion		33.257	51.27	2.11	0.29	13.21	0.98	5.69	9.41	0.28	13.47	0.1		96.81			1313
Barnes et al. (2010)	ODP Leg 126, site 782A	782A-19X-2-24-26	782A-19X-2-24-26	Izu volcanic arc	30.861	141.314	plagioclase-hosted melt inclusion		6.031	53	2.01	0.25	8.82	0.55	5.65	10.64	0.2	15.57	0.12		96.81			753
Barnes et al. (2010)	ODP Leg 126, site 782A	782A-27X-2-30-32	782A-27X-2-30-32	Izu volcanic arc	30.861	141.314	glass shards from tephra		10.693	53.91	2.92	0.37	12.03	1.14	3.91	7.85	0.24	14.3	0.15		96.82			1500
Schindlbeck et al. (2018)	IODP 350, site 1436A	350-U1436A-9H-2-78-80	350-U1436A-9H-2-78-80-12	Izu volcanic arc	32.398	140.365	glass shard	56.32	0.810559	52.85	2.6	0.2802	11.85	1.1379	4.75	9.23	0.1937	13.85	0.0881		96.8299
Barnes et al. (2010)	ODP Leg 126, site 782A	782A-21X-2-84-86	782A-21X-2-84-86	Izu volcanic arc	30.861	141.314	glass shards from tephra		7.227	52.73	2.31	0.29	10.94	0.86	4.29	9.58	0.19	15.64			96.83
Schindlbeck et al. (2018)	IODP 350, site 1436A	350-U1436A-9H-2-78-80	350-U1436A-9H-2-78-80-6	Izu volcanic arc	32.398	140.365	glass shard	56.32	0.810559	51.98	2.42	0.2506	12.92	1.158	4.77	9.22	0.2171	13.82	0.0842		96.8399
Barnes et al. (2010)	ODP Leg 126, site 782A	782A-19X-2-24-26	782A-19X-2-24-26	Izu volcanic arc	30.861	141.314	plagioclase-hosted melt inclusion		6.031	51.76	1.88	0.14	10.35	0.59	6.91	9.9	0.32	14.9	0.09		96.84			420
Schindlbeck et al. (2018)	IODP 350, site 1436A	350-U1436A-9H-2-95-97	350-U1436A-9H-2-95-97-1	Izu volcanic arc	32.398	140.365	glass shard	56.49	0.813345	52.39	1.3081	0.3161	12.93	1.1484	4.93	9.69	0.2488	13.8	0.0907		96.8521
Schindlbeck et al. (2018)	IODP 350, site 1436A	350-U1436A-2H-3-90-92	350-U1436A-2H-3-90-92-11	Izu volcanic arc	32.398	140.365	glass shard	4.55	0.088	55.54	3.18	0.3714	11.02	1.1625	3.2	7.69	0.2774	14.3	0.1116		96.8529
Barnes et al. (2010)	ODP Leg 126, site 782A	782A-14X-2-142-144	782A-14X-2-142-144	Izu volcanic arc	30.861	141.314	glass shards from tephra		3.454	55.65	2.95	0.42	11.7	0.96	3.35	7.47	0.25	14	0.11		96.86			1965
Barnes et al. (2010)	ODP Leg 126, site 782A	782A-39X-1-21-23	782A-39X-1-21-23	Izu volcanic arc	30.861	141.314	plagioclase-hosted melt inclusion		33.257	51.73	1.95	0.27	11.3	0.78	6.57	10.43	0.23	13.51	0.1		96.87			943
Bryant et al. (2003)	ODP Leg 125, Site 786A	786A-5X-1-74-76	786A-5X-1-74-76-2C	Izu volcanic arc	31.88	141.23	glass shard	38.9	5.6	55.41	2.8	0.23	13.24	1.21	3.63	8.65	0.21	14.62			96.87
Schindlbeck et al. (2018)	IODP 350, site 1436A	350-U1436A-8H-3-58-60	350-U1436A-8H-3-58-60-14	Izu volcanic arc	32.398	140.365	glass shard	53.56	0.765331	53.86	2.66	0.3064	12.06	1.1304	3.68	8.36	0.2099	14.54	0.0634		96.8701
Schindlbeck et al. (2018)	IODP 350, site 1436A	350-U1436A-9H-2-78-80	350-U1436A-9H-2-78-80-5	Izu volcanic arc	32.398	140.365	glass shard	56.32	0.810559	52.27	2.42	0.3103	13.43	1.3081	4.69	9.07	0.2005	13.09	0.0885		96.8774
Straub and Layne (2003)	ODP Leg 126, site 782A	782A-39-X-1-21-23	782A-39-X-1-21-23	Izu volcanic arc	30.861	141.314	plagioclase-hosted melt inclusion		29.61	51.73	1.95	0.28	11.3	0.78	6.57	10.43	0.23	13.51	0.1		96.88	3.12	202	943	9	6.7
Straub and Layne (2003)	ODP Leg 126, site 782A	782A-39X-1-21-23	782A-39X-1-21-23	Izu volcanic arc	30.861	141.314	plagioclase-hosted melt inclusion		29.6	51.73	1.95	0.28	11.3	0.78	6.57	10.43	0.23	13.51	0.1		96.88	3.35	202	943	9	6.7
Straub (2003)	ODP Leg 126, site 782A	782A-39X-1-21-23	782A-39X-1-21-23-5A	Izu volcanic arc	30.861	141.314	plagioclase-hosted melt inclusion		29.6	51.73	1.95	0.28	11.3	0.78	6.57	10.43	0.23	13.51	0.1		96.88	3.35	202	943	9	6.7
Schindlbeck et al. (2018)	IODP 350, site 1436A	350-U1436A-8H-1-5-7	350-U1436A-8H-1-5-7-6	Izu volcanic arc	32.398	140.365	glass shard	50.45	0.714367	53.31	2.95	0.2874	12.33	1.1221	3.77	8.33	0.257	14.48	0.0525		96.889
Barnes et al. (2010)	ODP Leg 126, site 782A	782A-14X-2-142-144	782A-14X-2-142-144	Izu volcanic arc	30.861	141.314	glass shards from tephra		3.454	55.99	2.92	0.49	11.16	1.03	3.19	7.45	0.24	14.3	0.12		96.89			1390
Barnes et al. (2010)	ODP Leg 126, site 782A	782A-39X-1-21-23	782A-39X-1-21-23	Izu volcanic arc	30.861	141.314	plagioclase-hosted melt inclusion		33.257	53.58	2.04	0.24	10.96	0.6	4.73	9.54	0.22	14.92	0.07		96.9			837
Bryant et al. (2003)	ODP Leg 126, site 782A	782A-35X-6-130-136	782A-35X-6-130-136-24A	Izu volcanic arc	30.861	141.314	glass shard		24	55.08	2.39	0.22	13.01	1.07	3.84	9.03	0.35	15.01			96.9
Kutterholf et al. (2018)	IODP 352, site U1439A	352-U1440A-4H-5-100-109	352-U1440A-4H-5_100-109 average II	Izu rear- arc?	28.4	142.6	glass shard	29.78	2.32183	56.6291	3.16965	0.454667	11.5933	1.1787	3.67312	8.28791	0.233558	14.6408	0.139061		96.9096					7.76	37.985	7.95	205.175	26.425	62.76	0.938	0.291	138.125	4.225	10.785	1.8495	9.475	3.24	1.165	3.86	0.6155	4.585	0.9905	3.215	0.486	2.93	0.4555	1.59
Barnes et al. (2010)	ODP Leg 126, site 782A	782A-21X-3-26-27	782A-21X-3-26-27	Izu volcanic arc	30.861	141.314	plagioclase-hosted melt inclusion		7.267	50.23	2.22	0.31	15.54	1.43	6.09	9.2	0.21	11.5	0.19		96.92			850
Barnes et al. (2010)	ODP Leg 126, site 782A	782A-6H-6-55-57	782A-6H-6-55-57	Izu volcanic arc	30.861	141.314	glass shards from tephra		1.925	52.64	2.34	0.4	12.47	1.02	4.38	9.53	0.23	13.8	0.11		96.92			985
Schindlbeck et al. (2018)	IODP 350, site 1436A	350-U1436A-9H-3-38-40	350-U1436A-9H-3-38-40-6	Izu volcanic arc	32.398	140.365	glass shard	56.93	0.820555	51.83	2.6	0.342	13.27	1.2673	4.53	9.17	0.193	13.62	0.102		96.9243
Schindlbeck et al. (2018)	IODP 350, site 1436A	350-U1436A-3H-3-28-30	350-U1436A-3H-3-28-30-7	Izu volcanic arc	32.398	140.365	glass shard	12.95	0.207005	51.33	1.3215	0.2973	15.08	1.5572	3.75	9.31	0.3177	13.91	0.0515		96.9252
Barnes et al. (2010)	ODP Leg 126, site 782A	782A-11X-3-0-1	782A-11X-3-0-1	Izu volcanic arc	30.861	141.314	glass shards from tephra		2.842	53.13	2.82	0.21	12.23	1.08	4.2	8.13	0.22	14.8	0.12		96.94			1410
Barnes et al. (2010)	ODP Leg 126, site 782A	782A-27X-2-30-32	782A-27X-2-30-32	Izu volcanic arc	30.861	141.314	glass shards from tephra		10.693	51.46	2.17	0.19	13.48	1.18	5.47	9.4	0.34	13.2	0.05		96.94			570
Barnes et al. (2010)	ODP Leg 126, site 782A	782A-23X-6-66-68	782A-23X-6-66-68	Izu volcanic arc	30.861	141.314	glass shards from tephra		8.751	52.54	2.24	0.36	12.88	1.22	4.3	8.87	0.21	14.22	0.11		96.95			1008
Barnes et al. (2010)	ODP Leg 126, site 782A	782A-21X-2-50-52	782A-21X-2-50-52	Izu volcanic arc	30.861	141.314	glass shards from tephra		7.207	52.34	2.49	0.31	13.01	1.05	4.54	8.78	0.23	14.1	0.1		96.95			1110
Straub and Layne (2003)	ODP Leg 126, site 782A	782A-39-X-1-21-23	782A-39-X-1-21-23	Izu volcanic arc	30.861	141.314	plagioclase-hosted melt inclusion		29.61	50.18	1.79	0.25	11.43	0.93	6.08	11.09	0.22	14.86	0.12		96.95	3.05	123	747	14	5.1
Straub and Layne (2003)	ODP Leg 126, site 782A	782A-39X-1-21-23	782A-39X-1-21-23	Izu volcanic arc	30.861	141.314	plagioclase-hosted melt inclusion		29.61	50.18	1.79	0.25	11.43	0.93	6.08	11.09	0.22	14.86	0.12		96.95	3.3	123	747	14	5.1
Straub (2003)	ODP Leg 126, site 782A	782A-39X-1-21-23	782A-39X-1-21-23-3A	Izu volcanic arc	30.861	141.314	plagioclase-hosted melt inclusion		29.61	50.18	1.79	0.25	11.43	0.93	6.08	11.09	0.22	14.86	0.12		96.95	3.3	123	747	14	5.1
Barnes et al. (2010)	ODP Leg 126, site 782A	782A-39X-1-21-23	782A-39X-1-21-23	Izu volcanic arc	30.861	141.314	plagioclase-hosted melt inclusion		33.257	50.18	1.79	0.25	11.43	0.93	6.08	11.09	0.22	14.86	0.12		96.95			747
Schindlbeck et al. (2018)	IODP 350, site 1436A	350-U1436A-4H-4-63-65	350-U1436A-4H-4-63-65-3	Izu volcanic arc	32.398	140.365	glass shard	21.93	0.319582	53.04	2.58	0.2614	12.54	1.1802	4.06	8.98	0.2334	13.97	0.1125		96.9575
Schindlbeck et al. (2018)	IODP 350, site 1436A	350-U1436A-8H-3-58-60	350-U1436A-8H-3-58-60-13	Izu volcanic arc	32.398	140.365	glass shard	53.56	0.765331	52.3	2.83	0.2867	13.13	1.1511	4.07	8.75	0.2792	14.1	0.0765		96.9735
Barnes et al. (2010)	ODP Leg 126, site 782A	782A-11X-1-55-57	782A-11X-1-55-57	Izu volcanic arc	30.861	141.314	glass shards from tephra		2.789	54.9	2.96	0.39	11.59	1.18	3.37	7.85	0.34	14.2	0.2		96.98			2300
Barnes et al. (2010)	ODP Leg 126, site 782A	782A-19X-2-24-26	782A-19X-2-24-26	Izu volcanic arc	30.861	141.314	plagioclase-hosted melt inclusion		6.031	53.04	2.09	0.24	10.77	0.78	5.43	9.82	0.19	14.53	0.1		96.99			1015
Barnes et al. (2010)	ODP Leg 126, site 782A	782A-14X-2-142-144	782A-14X-2-142-144	Izu volcanic arc	30.861	141.314	glass shards from tephra		3.454	55.71	2.87	0.52	11.69	0.97	3.31	7.38	0.3	14.1	0.14		96.99			2000
Barnes et al. (2010)	ODP Leg 126, site 782A	782A-6H-6-55-57	782A-6H-6-55-57	Izu volcanic arc	30.861	141.314	glass shards from tephra		1.925	52.47	2.43	0.42	12.49	1.12	4.52	9.2	0.19	14	0.16		97			970
Bryant et al. (2003)	ODP Leg 125, Site 786A	786A-5X-1-74-76	786A-5X-1-74-76-2C	Izu volcanic arc	30.861	141.314	glass shard	38.9	5.6	56.09	2.72	0.27	13.07	1.12	3.63	8.53	0.11	14.44			97.01
Schindlbeck et al. (2018)	IODP 350, site 1436A	350-U1436A-4H-5-105-107	350-U1436A-4H-5-105-107-13	Izu volcanic arc	32.398	140.365	glass shard		0.0523716	55.33	2.85	0.2088	11.52	1.0474	3.41	8.25	0.1926	14.15	0.0525		97.0113
Barnes et al. (2010)	ODP Leg 126, site 782A	782A-14X-5-14-17	782A-14X-5-14-17	Izu volcanic arc	30.861	141.314	glass shards from tephra		3.52	53.48	2.39	0.35	10.97	0.77	4.9	9.52	0.22	14.3	0.12		97.02			770
Schindlbeck et al. (2018)	IODP 350, site 1436A	350-U1436A-7H-4-38-40	350-U1436A-7H-4-38-40-14	Izu volcanic arc	32.398	140.365	glass shard	47.99	0.674055	53.17	2.88	0.3271	12.63	1.1364	3.88	8.54	0.2231	14.12	0.1186		97.0252
Schindlbeck et al. (2018)	IODP 350, site 1436A	350-U1436A-3H-2-25-27	350-U1436A-3H-2-25-27-7	Izu volcanic arc	32.398	140.365	glass shard	12.95	0.207005	54.17	2.65	0.3995	14.35	1.6269	3.09	7.86	0.2473	12.51	0.123		97.0267
Schindlbeck et al. (2018)	IODP 350, site 1436A	350-U1436A-4H-5-105-107	350-U1436A-4H-5-105-107-9	Izu volcanic arc	32.398	140.365	glass shard		0.0523716	55.51	2.69	0.2099	11.33	0.9991	3.42	8.26	0.2946	14.25	0.065		97.0286
Barnes et al. (2010)	ODP Leg 126, site 782A	782A-17X4-0-2	782A-17X-4-0-2	Izu volcanic arc	30.861	141.314	glass shards from tephra		5.031	55.63	3.1	0.35	9.99	1.16	3.5	7.77	0.22	15.16	0.15		97.03			1067
Barnes et al. (2010)	ODP Leg 126, site 782A	782A-28X-4-128-130	782A-28X-4-128-130	Izu volcanic arc	30.861	141.314	plagioclase-hosted melt inclusion		11.223	55.56	2.82	0.5	10.18	0.66	4.65	8.1	0.24	14.2	0.12		97.03			680
Barnes et al. (2010)	ODP Leg 126, site 782A	782A-17X-2-7-8	782A-17X-2-7-8	Izu volcanic arc	30.861	141.314	glass shards from tephra		4.854	55.35	2.71	0.34	11.24	1.06	3.53	8.04	0.2	14.47	0.1		97.04			1560
Barnes et al. (2010)	ODP Leg 126, site 782A	782A-17X4-0-2	782A-17X-4-0-2	Izu volcanic arc	30.861	141.314	glass shards from tephra		5.031	55.67	3.14	0.34	9.95	1.14	3.51	7.77	0.21	15.16	0.15		97.04			1012
Barnes et al. (2010)	ODP Leg 126, site 782A	782A-6H-6-55-57	782A-6H-6-55-57	Izu volcanic arc	30.861	141.314	glass shards from tephra		1.925	55.5	2.63	0.38	10.83	1.01	3.39	8.6	0.19	14.4	0.11		97.04			1540
Schindlbeck et al. (2018)	IODP 350, site 1436A	350-U1436A-4H-4-63-65	350-U1436A-4H-4-63-65-2	Izu volcanic arc	32.398	140.365	glass shard	21.93	0.319582	52.79	2.56	0.2609	13.04	1.1775	3.87	8.77	0.2615	14.25	0.0694		97.0493
Barnes et al. (2010)	ODP Leg 126, site 782A	782A-23X-6-66-68	782A-23X-6-66-68	Izu volcanic arc	30.861	141.314	glass shards from tephra		8.751	52.38	2.27	0.35	12.93	1.25	4.28	8.92	0.22	14.34	0.11		97.05			1052
Schindlbeck et al. (2018)	IODP 350, site 1436A	350-U1436A-9H-4-10-12	350-U1436A-9H-4-10-12-12	Izu volcanic arc	32.398	140.365	glass shard	56.64	0.815803	52.94	2.49	0.2903	11.86	0.9009	4.77	9.27	0.2043	14.25	0.0893		97.0648
Barnes et al. (2010)	ODP Leg 126, site 782A	782A-21X-5-43-45	782A-21X-5-43-45	Izu volcanic arc	30.861	141.314	glass shards from tephra		7.474	54.51	2.6	0.34	13.98	1.46	3.53	8.69	0.27	11.6	0.09		97.07			770
Barnes et al. (2010)	ODP Leg 126, site 782A	782A-39X-1-21-23	782A-41X-4-71-73	Izu volcanic arc	30.861	141.314	glass shards from tephra		39.981	54.83	2.57	0.23	10.48	1.04	4.1	9.06	0.12	14.5	0.14		97.07			1070
Schindlbeck et al. (2018)	IODP 350, site 1436A	350-U1436A-9H-4-67-69	350-U1436A-9H-4-67-69-4	Izu volcanic arc	32.398	140.365	glass shard	56.64	0.815803	52.6	2.61	0.3369	13.38	1.2285	4.19	8.68	0.1918	13.74	0.1163		97.0735					2.6433	17.9143	1.44275	51.0704	8.45606	15.4923	0.122352	0.210462	30.1704	0.661869	2.1777	0.381462	2.30715	0.787144	0.331979	1.06275	0.21777	1.34462	0.346594	0.904067	0.138011	1.00011	0.148451	0.588792
Barnes et al. (2010)	ODP Leg 126, site 782A	782A-26X-5-147-149	782A-26X-5-147-149	Izu volcanic arc	30.861	141.314	glass shards from tephra		10.45	56.64	2.81	0.32	9.55	1.08	3.47	7.64	0.24	15.15	0.18		97.08			987
Schindlbeck et al. (2018)	IODP 350, site 1436A	350-U1436A-7H-4-16-18	350-U1436A-7H-4-16-18-7	Izu volcanic arc	32.398	140.365	glass shard	47.77	0.67045	56.15	3.11	0.324	10.76	1.2197	3.23	7.78	0.2368	14.12	0.1524		97.0829
Schindlbeck et al. (2018)	IODP 350, site 1436A	350-U1436A-8H-1-5-7	350-U1436A-8H-1-5-7-10	Izu volcanic arc	32.398	140.365	glass shard	50.45	0.714367	53.58	2.84	0.3107	12.14	1.1385	3.96	8.43	0.2293	14.36	0.1021		97.0906
Barnes et al. (2010)	ODP Leg 126, site 782A	782A-17X-1-56-58	782A-17X-1-56-58	Izu volcanic arc	30.861	141.314	glass shards from tephra		4.793	56.3	2.95	0.33	10.46	0.96	3.28	7.94	0.25	14.5	0.16		97.13			1180
Barnes et al. (2010)	ODP Leg 126, site 782A	782A-39X-1-21-23	782A-39X-1-21-23	Izu volcanic arc	30.861	141.314	glass shards from tephra		33.257	56.36	3.33	0.43	10.51	0.99	2.89	7.41	0.35	14.7	0.16		97.13			1870
Barnes et al. (2010)	ODP Leg 126, site 782A	782A-29X-5-13-15	782A-29X-5-13-15	Izu volcanic arc	30.861	141.314	glass shards from tephra		11.951	54.52	2.76	0.42	11.55	1.02	4.02	8	0.22	14.48	0.14		97.13			1472
Bryant et al. (2003)	ODP Leg 126, site 782A	782A-35X-6-130-136	782A-35X-6-130-136-24A	Izu volcanic arc	30.861	141.314	glass shard		24	56.57	2.85	0.4	12.2	1.03	3.58	8.34	0.28	14.76			97.13
Barnes et al. (2010)	ODP Leg 126, site 782A	782A-17X4-0-2	782A-17X-4-0-2	Izu volcanic arc	30.861	141.314	glass shards from tephra		5.031	55.76	3.17	0.34	9.91	1.15	3.4	7.69	0.23	15.32	0.16		97.13			1067
Schindlbeck et al. (2018)	IODP 350, site 1436A	350-U1436A-4H-4-39-41	350-U1436A-4H-4-39-41-9	Izu volcanic arc	32.398	140.365	glass shard	12.95	0.207005	54.26	2.68	0.2052	12.1	1.0778	3.57	8.6	0.2115	14.36	0.0669		97.1314
Schindlbeck et al. (2018)	IODP 350, site 1436A	350-U1436A-9H-3-38-40	350-U1436A-9H-3-38-40-3	Izu volcanic arc	32.398	140.365	glass shard	56.93	0.820555	52.41	2.62	0.307	12.36	1.1082	4.64	9.44	0.2015	13.96	0.0897		97.1364
Barnes et al. (2010)	ODP Leg 126, site 782A	782A-39X-1-21-23	782A-39X-1-21-23	Izu volcanic arc	30.861	141.314	plagioclase-hosted melt inclusion		33.257	52.17	2.14	0.25	12.34	0.94	5.79	9.49	0.3	13.61	0.11		97.14			1393
Barnes et al. (2010)	ODP Leg 126, site 782A	782A-28X-4-128-130	782A-28X-4-128-130	Izu volcanic arc	30.861	141.314	plagioclase-hosted melt inclusion		11.223	54.96	3.19	0.48	9.4	0.61	4.4	8.58	0.23	15.2	0.09		97.14			840
Schindlbeck et al. (2018)	IODP 350, site 1436A	350-U1436A-9H-2-78-80	350-U1436A-9H-2-78-80-15	Izu volcanic arc	32.398	140.365	glass shard	56.32	0.810559	52.66	2.45	0.2839	12.4	1.0524	4.9	9.23	0.2158	13.84	0.1147		97.1468
Schindlbeck et al. (2018)	IODP 350, site 1436A	350-U1436A-9H-4-93-94	350-U1436A-9H-4-93-94-9	Izu volcanic arc	32.398	140.365	glass shard	56.64	0.815803	52.86	2.41	0.2849	11.73	0.935	4.88	9.32	0.2296	14.39	0.1077		97.1472
Schindlbeck et al. (2018)	IODP 350, site 1436A	350-U1436A-9H-4-75-77	350-U1436A-9H-4-75-77-12	Izu volcanic arc	32.398	140.365	glass shard	56.64	0.815803	51.29	2.7	0.3074	13.76	1.2321	4.19	9.05	0.1729	14.4	0.0492		97.1516
Schindlbeck et al. (2018)	IODP 350, site 1436A	350-U1436A-7H-3-93-95	350-U1436A-7H-3-93-95-12	Izu volcanic arc	32.398	140.365	glass shard	47.04	0.658487	51.08	2.49	0.2593	13.82	1.2386	5.38	9.6	0.2887	12.87	0.1253		97.1519					7.99	61.61	5.58	181.87	23.14	54.31	0.499	0.579	113.89	3.47	9.39	1.472	7.73	3.05	0.858	3.5	0.492	4.24	0.917	3.1	0.422	2.9	0.445	1.7
Schindlbeck et al. (2018)	IODP 350, site 1436A	350-U1436A-7H-4-38-40	350-U1436A-7H-4-38-40-9	Izu volcanic arc	32.398	140.365	glass shard	47.99	0.674055	54.92	2.88	0.3019	11.92	1.0927	3.59	8.19	0.2188	13.92	0.1251		97.1585
Bryant et al. (2003)	ODP Leg 125, Site 786A	786A-5X-1-74-76	786A-5X-1-74-76-2C	Izu volcanic arc	31.88	141.23	glass shard	38.9	5.6	53.74	2.63	0.19	13.53	1.15	4.43	9.47	0.18	14.66			97.16				15	6.1	53	2.3	135	22.5	41.4	0.288	0.26	116	1.39	4.69	0.92	5.2	2.15	0.82	2.79		3.72		2.41		2.49		1.26
Barnes et al. (2010)	ODP Leg 126, site 782A	782A-39X-1-21-23	782A-39X-1-21-23	Izu volcanic arc	30.861	141.314	plagioclase-hosted melt inclusion		33.257	55.73	2.72	0.52	11.14	1.06	3.72	8.01	0.19	13.96	0.11		97.16			1677
Schindlbeck et al. (2018)	IODP 350, site 1436A	350-U1436A-8H-1-5-7	350-U1436A-8H-1-5-7-4	Izu volcanic arc	32.398	140.365	glass shard	50.45	0.714367	53.52	2.95	0.2979	12.13	1.1022	3.96	8.52	0.1561	14.48	0.0501		97.1663
Barnes et al. (2010)	ODP Leg 126, site 782A	782A-14X-2-142-144	782A-14X-2-142-144	Izu volcanic arc	30.861	141.314	glass shards from tephra		3.454	56.33	3	0.42	11.16	0.98	3.33	7.36	0.2	14.3	0.09		97.17			1740
Bryant et al. (2003)	ODP Leg 125, Site 786A	786A-5X-1-74-76	786A-5X-1-74-76-2C	Izu volcanic arc	31.88	141.23	glass shard	38.9	5.6	54.15	2.08	0.18	13.48	1.15	4.38	9.56	0.15	14.86			97.17
Barnes et al. (2010)	ODP Leg 126, site 782A	782A-32X-2-26-28	782A-32X-2-26-28	Izu volcanic arc	30.861	141.314	glass shards from tephra		13.349	56.06	2.74	0.63	10.57	0.84	3.05	7.93	0.23	15	0.13		97.18			840
Barnes et al. (2010)	ODP Leg 126, site 782A	782A-13X-3-51-53	782A-13X-3-51-53	Izu volcanic arc	30.861	141.314	glass shards from tephra		3.262	54.06	2.92	0.41	10.94	0.9	3.92	8.18	0.35	15.4	0.11		97.19			1410
Barnes et al. (2010)	ODP Leg 126, site 782A	782A-17X-2-7-8	782A-17X-2-7-8	Izu volcanic arc	30.861	141.314	glass shards from tephra		4.854	55.39	2.74	0.33	11.37	1.1	3.41	8.09	0.27	14.5			97.2
Schindlbeck et al. (2018)	IODP 350, site 1436A	350-U1436A-1H-2-91-93	350-U1436A-1H-2-91-93-9	Izu volcanic arc	32.398	140.365	glass shard	2.41	0.0438292	51.01	1.99	0.2406	14.2	1.0151	5.4	10.38	0.2479	12.62	0.103		97.2066
Barnes et al. (2010)	ODP Leg 126, site 782A	782A-14X-5-14-17	782A-14X-5-14-17	Izu volcanic arc	30.861	141.314	glass shards from tephra		3.52	53.59	2.32	0.28	11.04	0.72	4.96	9.62	0.1	14.5	0.08		97.21			1080
Straub (2003)	ODP Leg 126, site 782A	782A-25X-4-111-113	782A-25X-4-111-113	Izu volcanic arc	30.861	141.314	glass shards from tephra		9.757	50.97	2.01	0.3	11.17	0.74	6.48	10.9	0.17	14.36	0.11		97.21
Barnes et al. (2010)	ODP Leg 126, site 782A	782A-17X4-0-2	782A-17X-4-0-2	Izu volcanic arc	30.861	141.314	glass shards from tephra		5.031	55.66	3.19	0.28	10.28	1.18	3.51	7.33	0.25	15.3	0.23		97.21			910
Barnes et al. (2010)	ODP Leg 126, site 782A	782A-19X-2-24-26	782A-19X-2-24-26	Izu volcanic arc	30.861	141.314	plagioclase-hosted melt inclusion		6.031	54.9	2.57	0.3	10.91	0.68	3.79	8.49	0.18	15.31	0.08		97.21			910
Barnes et al. (2010)	ODP Leg 126, site 782A	782A-19X-2-24-26	782A-19X-2-24-26	Izu volcanic arc	30.861	141.314	plagioclase-hosted melt inclusion		6.031	52.14	2.04	0.25	11.25	0.76	5.65	10.14	0.22	14.76			97.21
Bryant et al. (2003)	ODP Leg 125, Site 786A	786A-5X-1-74-76	786A-5X-1-74-76-2C	Izu volcanic arc	31.88	141.23	glass shard	38.9	5.6	54.88	2.7	0.27	13.76	1.33	4.15	8.86	0.25	13.81			97.23
Barnes et al. (2010)	ODP Leg 126, site 782A	782A-19X-2-24-26	782A-19X-2-24-26	Izu volcanic arc	30.861	141.314	plagioclase-hosted melt inclusion		6.031	54.19	2.5	0.34	11.28	0.7	4.07	8.6	0.23	15.23	0.09		97.23			977
Bryant et al. (2003)	ODP Leg 126, site 782A	782A-35X-6-130-136	782A-35X-6-130-136-24A	Izu volcanic arc	30.861	141.314	glass shard		24	55.74	2.76	0.49	12.63	1.09	3.47	8.45	0.16	15.21			97.24						41	7.8	179	25.7	49.4	0.457	0.65	72	2.3	6.98	1.26	6.89	2.42	0.91	3.33		4.36		2.8		2.84		1.63
Bryant et al. (2003)	ODP Leg 125, Site 786A	786A-5X-1-74-76	786A-5X-1-74-76-2C	Izu volcanic arc	31.88	141.23	glass shard	38.9	5.6	54.11	1.97	0.19	13.61	1.17	4.44	9.59	0.16	14.76			97.24
Barnes et al. (2010)	ODP Leg 126, site 782A	782A-17X4-0-2	782A-17X-4-0-2	Izu volcanic arc	30.861	141.314	glass shards from tephra		5.031	56.61	3.33	0.31	9.79	1.24	3.13	7.06	0.25	15.3	0.23		97.25			1160
Barnes et al. (2010)	ODP Leg 126, site 782A	782A-25X-4-111-113	782A-25X-4-111-113	Izu volcanic arc	30.861	141.314	glass shards from tephra		9.757	50.97	2.01	0.3	11.17	0.74	6.48	10.9	0.17	14.4	0.11		97.25			140
Schindlbeck et al. (2018)	IODP 350, site 1436A	350-U1436A-2H-3-90-92	350-U1436A-2H-3-90-92-2	Izu volcanic arc	32.398	140.365	glass shard	4.55	0.088	55.96	3.04	0.4013	10.69	1.0764	3.24	7.8	0.2455	14.7	0.1042		97.2574
Schindlbeck et al. (2018)	IODP 350, site 1436A	350-U1436A-7H-4-38-40	350-U1436A-7H-4-38-40-4	Izu volcanic arc	32.398	140.365	glass shard	47.99	0.674055	54.78	2.98	0.3097	12	1.1169	3.63	8.23	0.1606	13.97	0.0825		97.2597
Barnes et al. (2010)	ODP Leg 126, site 782A	782A-11X-3-0-1	782A-11X-3-0-1	Izu volcanic arc	30.861	141.314	glass shards from tephra		2.842	52.12	2.51	0.23	12.32	1.13	4.44	9.17	0.25	14.97	0.12		97.26			1078
Schindlbeck et al. (2018)	IODP 350, site 1436A	350-U1436A-3H-2-25-27	350-U1436A-3H-2-25-27-2	Izu volcanic arc	32.398	140.365	glass shard	12.95	0.207005	56.34	3.1	0.2299	10.4	0.8842	4.74	7.79	0.2513	13.49	0.0433		97.2687					5.66	41.52	4.62	186.19	31.82	50.68	0.529	0.511	118.94	2.54	7.45	1.38	8.32	3.11	1.307	4.23	0.715	5.43	1.187	3.44	0.491	3.53	0.523	1.52
Schindlbeck et al. (2018)	IODP 350, site 1436A	350-U1436A-1H-2-91-93	350-U1436A-1H-2-91-93-11	Izu volcanic arc	32.398	140.365	glass shard	2.41	0.0438292	50.34	2.17	0.2058	13.22	0.9241	5.75	10.53	0.1776	13.94	0.0146		97.2721
Schindlbeck et al. (2018)	IODP 350, site 1436A	350-U1436A-9H-3-9	350-U1436A-9H-3-9-11-3	Izu volcanic arc	32.398	140.365	glass shard	56.64	0.815803	51.76	2.37	0.2736	12.12	1.0289	5.43	9.9	0.3204	14	0.0769		97.2798
Barnes et al. (2010)	ODP Leg 126, site 782A	782A-6H-6-55-57	782A-6H-6-55-57	Izu volcanic arc	30.861	141.314	glass shards from tephra		1.925	54.97	2.72	0.44	11.43	1.16	3.43	8.47	0.23	14.3	0.13		97.28			1260
Schindlbeck et al. (2018)	IODP 350, site 1436A	350-U1436A-1H-2-91-93	350-U1436A-1H-2-91-93-14	Izu volcanic arc	32.398	140.365	glass shard	2.41	0.0438292	51.69	2.29	0.2555	13.38	1.0393	4.97	9.81	0.1727	13.6	0.0783		97.2858
Bryant et al. (2003)	ODP Leg 125, Site 786A	786A-5X-1-74-76	786A-5X-1-74-76-2C	Izu volcanic arc	31.88	141.23	glass shard	38.9	5.6	54.58	2.64	0.2	14.37	1.29	4.12	8.97	0.15	13.68			97.29
Schindlbeck et al. (2018)	IODP 350, site 1436A	350-U1436A-9H-3-9	350-U1436A-9H-3-9-11-15	Izu volcanic arc	32.398	140.365	glass shard	56.64	0.815803	52.03	2.6	0.3115	13.25	1.2364	4.5	9.26	0.1664	13.89	0.0554		97.2997
Barnes et al. (2010)	ODP Leg 126, site 782A	782A-19X-2-24-26	782A-19X-2-24-26	Izu volcanic arc	30.861	141.314	plagioclase-hosted melt inclusion		6.031	52.82	1.91	0.25	9.35	0.59	5.93	10.62	0.22	15.5	0.11		97.3			678
Barnes et al. (2010)	ODP Leg 126, site 782A	782A-19X-2-24-26	782A-19X-2-24-26	Izu volcanic arc	30.861	141.314	plagioclase-hosted melt inclusion		6.031	52.37	1.67	0.2	10.83	0.65	5.69	10.63	0.23	14.93	0.1		97.3			503
Schindlbeck et al. (2018)	IODP 350, site 1436A	350-U1436A-3H-2-25-27	350-U1436A-3H-2-25-27-13	Izu volcanic arc	32.398	140.365	glass shard	12.95	0.207005	52.99	2.5	0.3027	12.64	1.1396	4.27	8.97	0.2321	14.19	0.067		97.3014
Schindlbeck et al. (2018)	IODP 350, site 1436A	350-U1436A-4H-5-39-41	350-U1436A-4H-5-39-41-5	Izu volcanic arc	32.398	140.365	glass shard	23.19	0.334935	54.25	2.86	0.2337	11.61	1.0467	3.55	8.56	0.3	14.82	0.0784		97.3088
Barnes et al. (2010)	ODP Leg 126, site 782A	782A-17X-1-56-58	782A-17X-1-56-58	Izu volcanic arc	30.861	141.314	glass shards from tephra		4.793	56.29	2.9	0.38	10.3	0.96	3.43	7.76	0.19	15	0.1		97.31			1210
Barnes et al. (2010)	ODP Leg 126, site 782A	782A-19X-2-24-26	782A-19X-2-24-26	Izu volcanic arc	30.861	141.314	glass shards from tephra		6.031	53.15	2.31	0.2	10.99	0.78	5.2	9.73	0.22	14.6	0.13		97.31			980
Bryant et al. (2003)	ODP Leg 125, Site 786A	786A-5X-1-74-76	786A-5X-1-74-76-2C	Izu volcanic arc	31.88	141.23	glass shard	38.9	5.6	54.04	2.23	0.18	13.7	1.21	4.35	9.43	0.16	14.7			97.31
Barnes et al. (2010)	ODP Leg 126, site 782A	782A-19X-2-24-26	782A-19X-2-24-26	Izu volcanic arc	30.861	141.314	plagioclase-hosted melt inclusion		6.031	53.81	1.98	0.19	9	0.56	5.76	10.55	0.22	15.15	0.1		97.32			783
Barnes et al. (2010)	ODP Leg 126, site 782A	782A-25X-4-111-113	782A-25X-4-111-113	Izu volcanic arc	30.861	141.314	glass shards from tephra		9.757	50.72	2.12	0.18	10.27	0.69	5.77	11.76	0.22	15.5	0.09		97.32			610
Barnes et al. (2010)	ODP Leg 126, site 782A	782A-14X-5-14-17	782A-14X-5-14-17	Izu volcanic arc	30.861	141.314	glass shards from tephra		3.52	53.72	2.41	0.3	11.03	0.8	4.76	9.57	0.23	14.5	0		97.32			770
Schindlbeck et al. (2018)	IODP 350, site 1436A	350-U1436A-2H-3-18-20	350-U1436A-2H-3-18-20-15	Izu volcanic arc	32.398	140.365	glass shard	4.55	0.088	50.74	1.89	0.2664	14.49	1.374	5.31	9.31	0.2249	13.58	0.1427		97.328
Straub and Layne (2003)	ODP Leg 126, site 782A	782A-19X-1-147-149	782A-19X-1-147-149	Izu volcanic arc	30.861	141.314	plagioclase-hosted melt inclusion		6.03	52.37	1.67	0.23	10.83	0.65	5.69	10.63	0.23	14.93	0.1		97.33	3.02	102	503	11	7.7
Straub (2003)	ODP Leg 126, site 782A	782A-19X-1-147-149	782A-19X-1-147-149-9A	Izu volcanic arc	30.861	141.314	plagioclase-hosted melt inclusion		6.03	52.37	1.67	0.23	10.83	0.65	5.69	10.63	0.23	14.93	0.1		97.33	3.02	102	503	11	7.7
Straub and Layne (2003)	ODP Leg 126, site 782A	782A-19X-1-147-149	782A-19X-1-147-149	Izu volcanic arc	30.861	141.314	plagioclase-hosted melt inclusion		6.03	52.37	1.67	0.23	10.83	0.65	5.69	10.63	0.23	14.93	0.1		97.33	2.67	102	503	11	7.7
Barnes et al. (2010)	ODP Leg 126, site 782A	782A-19X-2-24-26	782A-19X-2-24-26	Izu volcanic arc	30.861	141.314	plagioclase-hosted melt inclusion		6.031	53.22	2.05	0.31	11.64	0.77	5.18	9.45	0.21	14.41	0.09		97.33			993
Barnes et al. (2010)	ODP Leg 126, site 782A	782A-14X-2-142-144	782A-14X-2-142-144	Izu volcanic arc	30.861	141.314	glass shards from tephra		3.454	55.9	2.86	0.42	11.76	0.97	3.45	7.52	0.14	14.2	0.11		97.33			1670
Barnes et al. (2010)	ODP Leg 126, site 782A	782A-21X-3-26-27	782A-21X-3-26-27	Izu volcanic arc	30.861	141.314	plagioclase-hosted melt inclusion		7.267	49.86	2.21	0.34	15.57	1.48	5.93	9.26	0.22	12.3	0.16		97.33			1150
Schindlbeck et al. (2018)	IODP 350, site 1436A	350-U1436A-4H-4-63-65	350-U1436A-4H-4-63-65-10	Izu volcanic arc	32.398	140.365	glass shard	21.93	0.319582	56.37	2.97	0.2578	11.49	1.083	2.94	7.85	0.2394	14.08	0.059		97.3392
Barnes et al. (2010)	ODP Leg 126, site 782A	782A-19X-2-24-26	782A-19X-2-24-26	Izu volcanic arc	30.861	141.314	plagioclase-hosted melt inclusion		6.031	52.17	2.04	0.27	11.51	0.76	5.77	10.05	0.24	14.41	0.12		97.34			918
Schindlbeck et al. (2018)	IODP 350, site 1436A	350-U1436A-7H-4-38-40	350-U1436A-7H-4-38-40-15	Izu volcanic arc	32.398	140.365	glass shard	47.99	0.674055	54.77	3	0.2897	12	1.0907	3.66	8.22	0.2484	13.96	0.1043		97.3431
Barnes et al. (2010)	ODP Leg 126, site 782A	782A-6H-6-88-90	782A-6H-6-88-90	Izu volcanic arc	30.861	141.314	glass shards from tephra		1.938	54.96	2.96	0.34	11.39	0.96	3.6	8.23	0.23	14.58	0.1		97.35			1760
Barnes et al. (2010)	ODP Leg 126, site 782A	782A-39X-1-21-23	782A-41X-4-71-73	Izu volcanic arc	30.861	141.314	glass shards from tephra		39.981	56.58	2.4	0.34	10.71	1.05	3.72	8.45	0.29	13.7	0.11		97.35			580
Schindlbeck et al. (2018)	IODP 350, site 1436A	350-U1436A-7H-4-16-18	350-U1436A-7H-4-16-18-6	Izu volcanic arc	32.398	140.365	glass shard	47.77	0.67045	55.74	3.13	0.3371	11.38	1.2182	3.3	7.75	0.2276	14.18	0.0958		97.3587
Barnes et al. (2010)	ODP Leg 126, site 782A	782A-19X-2-24-26	782A-19X-2-24-26	Izu volcanic arc	30.861	141.314	plagioclase-hosted melt inclusion		6.031	54.56	2.38	0.29	9.19	0.54	5.69	10.1	0.15	14.4	0.06		97.36			1210
Schindlbeck et al. (2018)	IODP 350, site 1436A	350-U1436A-1H-2-91-93	350-U1436A-1H-2-91-93-10	Izu volcanic arc	32.398	140.365	glass shard	2.41	0.0438292	50.3	2.11	0.2042	13.3	0.9666	5.82	10.38	0.33	13.92	0.032		97.3628
Barnes et al. (2010)	ODP Leg 126, site 782A	782A-19X-2-24-26	782A-19X-2-24-26	Izu volcanic arc	30.861	141.314	plagioclase-hosted melt inclusion		6.031	52.87	1.86	0.22	9.24	0.62	5.78	10.75	0.19	15.74	0.1		97.37			798
Straub and Layne (2003)	ODP Leg 126, site 782A	782A-6H-6-88-90	782A-6H-6-88-90	Izu volcanic arc	30.861	141.314	glass shard		1.94	54.96	2.96	0.36	11.39	0.96	3.6	8.23	0.23	14.58	0.1		97.37	3.1	164	1760	18.7	6.9
Straub (2003)	ODP Leg 126, site 782A	782A-6H-6-88-90	782A-6H-6-88-90-F2	Izu volcanic arc	30.861	141.314	glass shards from tephra		1.94	54.96	2.96	0.36	11.39	0.96	3.6	8.23	0.23	14.58	0.1		97.37	3.1	164	1760	18.7	6.9
Straub and Layne (2003)	ODP Leg 126, site 782A	782A-6H-6-88-90	782A-6H-6-88-90	Izu volcanic arc	30.861	141.314	glass shards from tephra		1.94	54.96	2.96	0.36	11.39	0.96	3.6	8.23	0.23	14.58	0.1		97.37	2.8	164	1760	18.7	6.9
Barnes et al. (2010)	ODP Leg 126, site 782A	782A-17X-2-7-8	782A-17X-2-7-8	Izu volcanic arc	30.861	141.314	glass shards from tephra		4.854	55.66	2.8	0.34	11.31	1.06	3.39	8.09	0.25	14.47			97.37
Barnes et al. (2010)	ODP Leg 126, site 782A	782A-14X-2-142-144	782A-14X-2-142-144	Izu volcanic arc	30.861	141.314	glass shards from tephra		3.454	56.21	2.94	0.42	11.25	0.96	3.36	7.75	0.2	14.2	0.1		97.39			1770
Barnes et al. (2010)	ODP Leg 126, site 782A	782A-18X-1-15-17	782A-18X-1-15-17	Izu volcanic arc	30.861	141.314	glass shards from tephra		5.349	55.44	3	0.54	11.64	1.03	3.73	7.65	0.25	14	0.11		97.39			880
Schindlbeck et al. (2018)	IODP 350, site 1436A	350-U1436A-4H-4-63-65	350-U1436A-4H-4-63-65-5	Izu volcanic arc	32.398	140.365	glass shard	21.93	0.319582	53.4	2.47	0.2566	12.82	1.251	3.85	8.92	0.2729	14.04	0.1097		97.3902
Schindlbeck et al. (2018)	IODP 350, site 1436A	350-U1436A-8H-3-58-60	350-U1436A-8H-3-58-60-11	Izu volcanic arc	32.398	140.365	glass shard	53.56	0.765331	53.94	2.82	0.2976	11.99	1.1337	3.78	8.41	0.2182	14.76	0.0443		97.3938
Barnes et al. (2010)	ODP Leg 126, site 782A	782A-21X-3-26-27	782A-21X-3-26-27	Izu volcanic arc	30.861	141.314	glass shards from tephra		7.267	51.08	2.37	0.4	14.03	1.49	5.16	9.82	0.24	12.7	0.12		97.41			760
Barnes et al. (2010)	ODP Leg 126, site 782A	782A-11X-1-55-57	782A-11X-1-55-57	Izu volcanic arc	30.861	141.314	glass shards from tephra		2.789	54.24	2.8	0.43	11.57	0.99	3.77	8.53	0.14	14.8	0.15		97.42			1870
Barnes et al. (2010)	ODP Leg 126, site 782A	782A-14X-5-14-17	782A-14X-5-14-17	Izu volcanic arc	30.861	141.314	glass shards from tephra		3.52	53.29	2.36	0.35	10.97	0.68	4.88	9.83	0.22	14.7	0.14		97.42			840
Straub and Layne (2003)	ODP Leg 126, site 782A	782A-17X-4-0-2	782A-17X-4-0-2	Izu volcanic arc	30.861	141.314	glass shard		5.03	56.59	3.08	0.37	10.33	1.05	3.31	7.57	0.22	14.78	0.12		97.42		188	1350	16.8	6.86
Straub (2003)	ODP Leg 126, site 782A	782A-17X-4-0-2	782A-17X-4-0-2-C3	Izu volcanic arc	30.861	141.314	glass shards from tephra		5.03	56.59	3.08	0.37	10.33	1.05	3.31	7.57	0.22	14.78	0.12		97.42		188	1350	16.8	6.86
Straub and Layne (2003)	ODP Leg 126, site 782A	782A-17X-4-0-2	782A-17X-4-0-2	Izu volcanic arc	30.861	141.314	plagioclase-hosted melt inclusion		5.03	56.59	3.08	0.37	10.33	1.05	3.31	7.57	0.22	14.78	0.12		97.42	2.7	188	1350	16.8	6.86
Barnes et al. (2010)	ODP Leg 126, site 782A	782A-29X-3-9-11	782A-29X-3-9-11	Izu volcanic arc	30.861	141.314	glass shards from tephra		11.514	52.46	2.32	0.29	13.01	1.21	4.74	9.38	0.3	13.6	0.12		97.43			190
Barnes et al. (2010)	ODP Leg 126, site 782A	782A-19X-2-24-26	782A-19X-2-24-26	Izu volcanic arc	30.861	141.314	plagioclase-hosted melt inclusion		6.031	52.18	1.66	0.19	10.62	0.7	5.98	10.77	0.19	15.05	0.1		97.44			608
Barnes et al. (2010)	ODP Leg 126, site 782A	782A-17X4-0-2	782A-17X-4-0-2	Izu volcanic arc	30.861	141.314	glass shards from tephra		5.031	56.59	3.08	0.39	10.33	1.05	3.31	7.57	0.22	14.78	0.12		97.44			1350
Barnes et al. (2010)	ODP Leg 126, site 782A	782A-11X-3-0-1	782A-11X-3-0-1	Izu volcanic arc	30.861	141.314	glass shards from tephra		2.842	52.98	2.57	0.22	11.98	1.09	4.25	8.95	0.23	15.05	0.12		97.44			1213
Barnes et al. (2010)	ODP Leg 126, site 782A	782A-17X-1-56-58	782A-17X-1-56-58	Izu volcanic arc	30.861	141.314	glass shards from tephra		4.793	56.7	3.02	0.31	10.12	0.91	3.48	7.6	0.26	14.9	0.14		97.44			1020
Barnes et al. (2010)	ODP Leg 126, site 782A	782A-19X-2-24-26	782A-19X-2-24-26	Izu volcanic arc	30.861	141.314	plagioclase-hosted melt inclusion		6.031	52.02	2.16	0.27	11.43	0.79	5.3	10.18	0.31	14.9	0.08		97.44			1180
Kutterholf et al. (2018)	IODP 352, site U1440A	352-1440A-5H-3/4_148-6	352-1440A-5H-3/4_148-6 average	Izu volcanic arc	28.45	142.65	glass shard	36.76	3.52939	56.6197	3.19909	0.312574	10.9834	1.12785	3.67841	8.51703	0.263791	15.1108	0.187198		97.4417					7.5	51.3267	4.36667	216.15	25.0633	38.62	0.360333	0.250667	51.5467	2.05467	6.32	1.169	6.92333	2.55333	1.07767	3.69667	0.691667	4.59667	0.978333	2.82333	0.387	2.88	0.450667	1.27333
Barnes et al. (2010)	ODP Leg 126, site 782A	782A-39X-1-21-23	782A-39X-1-21-23	Izu volcanic arc	30.861	141.314	glass shards from tephra		33.257	53.53	2.97	0.48	11.93	0.79	3.81	8.64	0.16	15	0.14		97.45			1190
Schindlbeck et al. (2018)	IODP 350, site 1436A	350-U1436A-9H-3-9	350-U1436A-9H-3-9-11-11	Izu volcanic arc	32.398	140.365	glass shard	56.64	0.815803	51.41	2.72	0.3039	13.27	1.2875	5.02	9.55	0.2304	13.6	0.0655		97.4573
Straub and Layne (2003)	ODP Leg 126, site 782A	782A-19X-1-147-149	782A-19X-1-147-149	Izu volcanic arc	30.861	141.314	plagioclase-hosted melt inclusion		6.03	52.18	1.66	0.21	10.62	0.7	5.98	10.77	0.19	15.05	0.1		97.46	2.92	89	608	11	7.6
Straub (2003)	ODP Leg 126, site 782A	782A-19X-1-147-149	782A-19X-1-147-149-9B	Izu volcanic arc	30.861	141.314	plagioclase-hosted melt inclusion		6.03	52.18	1.66	0.21	10.62	0.7	5.98	10.77	0.19	15.05	0.1		97.46	2.92	89	608	11	7.6
Straub and Layne (2003)	ODP Leg 126, site 782A	782A-19X-1-147-149	782A-19X-1-147-149	Izu volcanic arc	30.861	141.314	plagioclase-hosted melt inclusion		6.03	52.18	1.66	0.21	10.62	0.7	5.98	10.77	0.19	15.05	0.1		97.46	2.54	89	608	11	7.6
Barnes et al. (2010)	ODP Leg 126, site 782A	782A-2H-4-113-114	782A-2H-4-113-114	Izu volcanic arc	30.861	141.314	plagioclase-hosted melt inclusion		0.546	51.66	2.14	0.5	8.96	0.61	6.46	11.37	0.2	15.44	0.12		97.46			982
Schindlbeck et al. (2018)	IODP 350, site 1436A	350-U1436A-4H-4-63-65	350-U1436A-4H-4-63-65-13	Izu volcanic arc	32.398	140.365	glass shard	21.93	0.319582	53.59	2.77	0.2644	12.65	1.1916	3.7	8.8	0.206	14.21	0.0855		97.4675
Barnes et al. (2010)	ODP Leg 126, site 782A	782A-14X-2-142-144	782A-14X-2-142-144	Izu volcanic arc	30.861	141.314	glass shards from tephra		3.454	56.22	3.01	0.42	11.73	0.95	3.29	7.32	0.1	14.3	0.13		97.47			2220
Barnes et al. (2010)	ODP Leg 126, site 782A	782A-13X-3-51-53	782A-13X-3-51-53	Izu volcanic arc	30.861	141.314	glass shards from tephra		3.262	54.8	2.84	0.4	10.87	0.99	3.77	8.21	0.21	15.23	0.15		97.47			1663
Barnes et al. (2010)	ODP Leg 126, site 782A	782A-19X-2-24-26	782A-19X-2-24-26	Izu volcanic arc	30.861	141.314	plagioclase-hosted melt inclusion		6.031	52.92	1.72	0.23	9.99	0.58	6.15	10.37	0.17	15.24	0.1		97.47			948
Barnes et al. (2010)	ODP Leg 126, site 782A	782A-19X-2-24-26	782A-19X-2-24-26	Izu volcanic arc	30.861	141.314	plagioclase-hosted melt inclusion		6.031	53.47	2.2	0.31	11.53	0.71	5.05	9.37	0.2	14.53	0.1		97.47			1033
Barnes et al. (2010)	ODP Leg 126, site 782A	782A-39X-1-21-23	782A-41X-4-71-73	Izu volcanic arc	30.861	141.314	glass shards from tephra		39.981	54.91	2.66	0.3	10.63	1.04	4.31	8.9	0.26	14.3	0.16		97.47			770
Barnes et al. (2010)	ODP Leg 126, site 782A	782A-6H-6-55-57	782A-6H-6-55-57	Izu volcanic arc	30.861	141.314	glass shards from tephra		1.925	53.02	2.36	0.33	12.15	1.02	4.51	9.48	0.14	14.3	0.16		97.47			1070
Schindlbeck et al. (2018)	IODP 350, site 1436A	350-U1436A-9H-2-95-97	350-U1436A-9H-2-95-97-5	Izu volcanic arc	32.398	140.365	glass shard	56.49	0.813345	52.78	2.63	0.3577	13.92	1.3503	4.53	8.98	0.154	12.72	0.0549		97.4769					7.96	44.6	4.61	140.05	22.59	43.45	0.348	0.5	84	1.821	5.92	1.107	6.04	2.46	0.807	3.26	0.664	4.04	0.854	2.47	0.354	2.43	0.433	1.74
Schindlbeck et al. (2018)	IODP 350, site 1436A	350-U1436A-7H-4-16-18	350-U1436A-7H-4-16-18-10	Izu volcanic arc	32.398	140.365	glass shard	47.77	0.67045	56.17	3.22	0.3258	10.99	1.2133	3.26	7.74	0.1832	14.26	0.1156		97.4779
Schindlbeck et al. (2018)	IODP 350, site 1436A	350-U1436A-4H-5-39-41	350-U1436A-4H-5-39-41-11	Izu volcanic arc	32.398	140.365	glass shard	23.19	0.334935	53.46	2.84	0.2162	12.6	1.0811	3.66	8.69	0.2412	14.62	0.0788		97.4873
Barnes et al. (2010)	ODP Leg 126, site 782A	782A-17X-2-7-8	782A-17X-2-7-8	Izu volcanic arc	30.861	141.314	glass shards from tephra		4.854	55.57	2.75	0.35	11.42	1.08	3.4	8.1	0.23	14.48	0.11		97.49			1555
Barnes et al. (2010)	ODP Leg 126, site 782A	782A-19X-2-24-26	782A-19X-2-24-26	Izu volcanic arc	30.861	141.314	plagioclase-hosted melt inclusion		6.031	54.05	1.93	0.17	9.15	0.57	5.2	10.58	0.21	15.55	0.09		97.5			528
Barnes et al. (2010)	ODP Leg 126, site 782A	782A-39X-1-21-23	782A-39X-1-21-23	Izu volcanic arc	30.861	141.314	plagioclase-hosted melt inclusion		33.257	54.91	2.69	0.47	12.46	1.18	3.65	8.2	0.23	13.58	0.13		97.5			1862
Straub and Layne (2003)	ODP Leg 126, site 782A	782A-19X-1-147-149	782A-19X-1-147-149	Izu volcanic arc	30.861	141.314	plagioclase-hosted melt inclusion		6.03	54.05	1.93	0.19	9.15	0.57	5.2	10.58	0.21	15.55	0.09		97.52	2.87	84	528	9	4.9
Straub (2003)	ODP Leg 126, site 782A	782A-19X-1-147-149	782A-19X-1-147-149-10A	Izu volcanic arc	30.861	141.314	plagioclase-hosted melt inclusion		6.03	54.05	1.93	0.19	9.15	0.57	5.2	10.58	0.21	15.55	0.09		97.52	2.87	84	528	9	4.9
Straub and Layne (2003)	ODP Leg 126, site 782A	782A-19X-1-147-149	782A-19X-1-147-149	Izu volcanic arc	30.861	141.314	plagioclase-hosted melt inclusion		6.03	54.05	1.93	0.19	9.15	0.57	5.2	10.58	0.21	15.55	0.09		97.52	2.48	84	528	9	4.9
Straub and Layne (2003)	ODP Leg 126, site 782A	782A-33X-5-36-39	782A-33X-5-36-39	Izu volcanic arc	30.861	141.314	glass shard		14.2	52.01	2.46	0.48	12.92	1.09	4.24	9.03	0.23	14.93	0.13		97.52	2	180	1643	14.9	6.2
Straub (2003)	ODP Leg 126, site 782A	782A-33X-5-36-39	782A-33X-5-36-39-D1	Izu volcanic arc	30.861	141.314	glass shards from tephra		14.2	52.01	2.46	0.48	12.92	1.09	4.24	9.03	0.23	14.93	0.13		97.52	2	180	1643	14.9	6.2
Straub and Layne (2003)	ODP Leg 126, site 782A	782A-33X-5-36-39	782A-33X-5-36-39	Izu volcanic arc	30.861	141.314	glass shards from tephra		14.2	52.01	2.46	0.48	12.92	1.09	4.24	9.03	0.23	14.93	0.13		97.52	2.6	180	1643	14.9	6.2
Schindlbeck et al. (2018)	IODP 350, site 1436A	350-U1436A-8H-3-58-60	350-U1436A-8H-3-58-60-6	Izu volcanic arc	32.398	140.365	glass shard	53.56	0.765331	53.93	2.8	0.3169	12.95	1.1411	3.63	8.27	0.1775	14.21	0.1006		97.5261
Barnes et al. (2010)	ODP Leg 126, site 782A	782A-17X-2-7-8	782A-17X-2-7-8	Izu volcanic arc	30.861	141.314	glass shards from tephra		4.854	55.96	2.76	0.33	11.68	1.06	3.39	7.89	0.19	14.17	0.1		97.53			1527
Barnes et al. (2010)	ODP Leg 126, site 782A	782A-33X-5-36-39	782A-33X-5-36-39	Izu volcanic arc	30.861	141.314	glass shards from tephra		14.201	52.01	2.46	0.49	12.92	1.09	4.24	9.03	0.23	14.93	0.13		97.53			1643
Straub and Layne (2003)	ODP Leg 126, site 782A	782A-13X-3-51-53	782A-13X-3-51-53	Izu volcanic arc	30.861	141.314	glass shard		3.26	54.76	2.81	0.38	10.91	1	3.82	8.28	0.21	15.24	0.13		97.54	2.7	203	1657	17.2	6.94
Straub (2003)	ODP Leg 126, site 782A	782A-13X-3-51-53	782A-13X-3-51-53-F5	Izu volcanic arc	30.861	141.314	glass shards from tephra		3.26	54.76	2.81	0.38	10.91	1	3.82	8.28	0.21	15.24	0.13		97.54	2.7	203	1657	17.2	6.94
Straub and Layne (2003)	ODP Leg 126, site 782A	782A-13X-3-51-53	782A-13X-3-51-53	Izu volcanic arc	30.861	141.314	glass shards from tephra		3.26	54.76	2.81	0.38	10.91	1	3.82	8.28	0.21	15.24	0.13		97.54	2.6	203	1657	17.2	6.94
Barnes et al. (2010)	ODP Leg 126, site 782A	782A-19X-2-24-26	782A-19X-2-24-26	Izu volcanic arc	30.861	141.314	glass shards from tephra		6.031	54.76	2.52	0.34	11.25	0.92	4.14	8.99	0.2	14.3	0.12		97.54			700
Straub et al. (2004)	ODP Leg 126, site 782A	782A‐11X‐3‐0‐1	782A‐11X‐3‐0‐1	Izu volcanic arc	30.861	141.314	glass shard		2.84	52.8	2.59	0.2	12.17	1.1	4.32	9.03	0.23	15.07	0.13		97.54					4		2.04	167.8	21.4	31.8	0.24	0.17	32.4	1.39	4.33	0.79	4.86	1.91	0.79	2.81	0.48	3.72	0.8	2.36	0.35	2.49	0.37	1.09
Barnes et al. (2010)	ODP Leg 126, site 782A	782A-11X-1-55-57	782A-11X-1-55-57	Izu volcanic arc	30.861	141.314	glass shards from tephra		2.789	53.95	2.85	0.48	11.61	1	3.71	8.41	0.3	15.1	0.14		97.55			1620
Barnes et al. (2010)	ODP Leg 126, site 782A	782A-13X-3-51-53	782A-13X-3-51-53	Izu volcanic arc	30.861	141.314	glass shards from tephra		3.262	54.76	2.81	0.39	10.91	1	3.82	8.28	0.21	15.24	0.13		97.55			1657
Barnes et al. (2010)	ODP Leg 126, site 782A	782A-14X-5-14-17	782A-14X-5-14-17	Izu volcanic arc	30.861	141.314	glass shards from tephra		3.52	53.96	2.41	0.34	11.47	0.75	4.76	9.3	0.17	14.2	0.19		97.55			980
Barnes et al. (2010)	ODP Leg 126, site 782A	782A-19X-2-24-26	782A-19X-2-24-26	Izu volcanic arc	30.861	141.314	plagioclase-hosted melt inclusion		6.031	52.86	2.13	0.23	10.98	0.64	5.54	9.98	0.23	14.86	0.1		97.55			903
Schindlbeck et al. (2018)	IODP 350, site 1436A	350-U1436A-7H-4-125-127	350-U1436A-7H-4-125-127-5	Izu volcanic arc	32.398	140.365	glass shard	48.86	0.688311	54.19	2.87	0.3371	12.97	1.066	3.77	8.4	0.1871	13.67	0.0948		97.555					7.83	42.19	4.01	135.82	26.77	49.12	0.478	0.552	93.43	2.095	6.24	1.225	6.93	2.61	0.854	3.7	0.694	4.46	1.065	3.12	0.349	2.5	0.42	1.86
Schindlbeck et al. (2018)	IODP 350, site 1436A	350-U1436A-9H-4-93-94	350-U1436A-9H-4-93-94-12	Izu volcanic arc	32.398	140.365	glass shard	56.64	0.815803	53.25	2.32	0.2972	11.99	0.922	4.93	9.48	0.2073	14.07	0.0892		97.5557
Barnes et al. (2010)	ODP Leg 126, site 782A	782A-19X-2-24-26	782A-19X-2-24-26	Izu volcanic arc	30.861	141.314	plagioclase-hosted melt inclusion		6.031	52.42	2.02	0.22	11.33	0.77	5.71	9.92	0.21	14.85	0.11		97.56			873
Barnes et al. (2010)	ODP Leg 126, site 782A	782A-11X-1-55-57	782A-11X-1-55-57	Izu volcanic arc	30.861	141.314	glass shards from tephra		2.789	54.32	2.74	0.42	11.67	0.92	3.8	8.55	0.14	14.9	0.1		97.56			2300
Schindlbeck et al. (2018)	IODP 350, site 1436A	350-U1436A-5H-5-114-116	350-U1436A-5H-5-114-116-11	Izu volcanic arc	32.398	140.365	glass shard		0.402073	55.67	2.49	0.3324	14.64	1.6385	2.79	8.12	0.2916	11.47	0.1251		97.5676
Barnes et al. (2010)	ODP Leg 126, site 782A	782A-19X-2-24-26	782A-19X-2-24-26	Izu volcanic arc	30.861	141.314	plagioclase-hosted melt inclusion		6.031	52.62	2.08	0.26	11.02	0.72	5.74	10.06	0.17	14.8	0.1		97.57			907
Barnes et al. (2010)	ODP Leg 126, site 782A	782A-37X-4-43-45	782A-37X-4-43-45	Izu volcanic arc	30.861	141.314	glass shards from tephra		29.223	52.2	2.51	0.4	13.68	1.11	4.56	9.01	0.24	13.7	0.16		97.57			1110
Schindlbeck et al. (2018)	IODP 350, site 1436A	350-U1436A-4H-5-105-107	350-U1436A-4H-5-105-107-14	Izu volcanic arc	32.398	140.365	glass shard		0.0523716	55.76	2.81	0.2203	11.57	1.076	3.35	8.34	0.2131	14.14	0.0918		97.5712
Schindlbeck et al. (2018)	IODP 350, site 1436A	350-U1436A-7H-4-16-18	350-U1436A-7H-4-16-18-12	Izu volcanic arc	32.398	140.365	glass shard	47.77	0.67045	55.21	2.95	0.2966	12.12	1.1607	3.53	8.22	0.2457	13.74	0.1021		97.5751
Barnes et al. (2010)	ODP Leg 126, site 782A	782A-18X-1-15-17	782A-18X-1-15-17	Izu volcanic arc	30.861	141.314	plagioclase-hosted melt inclusion		5.349	53.24	1.94	0.52	14.38	1.19	5.41	8.34	0.3	12.1	0.16		97.58			780
Barnes et al. (2010)	ODP Leg 126, site 782A	782A-14X-5-14-17	782A-14X-5-14-17	Izu volcanic arc	30.861	141.314	glass shards from tephra		3.52	53.9	2.37	0.24	10.99	0.69	5.02	9.54	0.18	14.6	0.05		97.58			1190
Barnes et al. (2010)	ODP Leg 126, site 782A	782A-13X-3-51-53	782A-13X-3-51-53	Izu volcanic arc	30.861	141.314	glass shards from tephra		3.262	54.55	2.95	0.41	11.54	0.89	3.76	8.09	0.12	15.1	0.18		97.59			1360
Straub et al. (2004)	ODP Leg 126, site 782A	782A‐33X‐5‐36‐39	782A‐33X‐5‐36‐39	Izu volcanic arc	30.861	141.314	glass shard		14.2	51.51	2.34	0.43	13.12	1.01	4.51	9.31	0.17	15.18	0.14		97.59					6.2		6.56	221.7	22.2	34.2	0.27	0.56	70.3	2.2	5.49	0.99	5.64	2.07	0.71	2.93	0.5	3.58	0.81	2.28	0.37	2.53	0.39	1.15
Bryant et al. (2003)	ODP Leg 125, Site 786A	786A-5X-1-74-76	786A-5X-1-74-76-2C	Izu volcanic arc	31.88	141.23	glass shard	38.9	5.6	54.06	2.56	0.18	13.54	1.16	4.32	9.43	0.17	14.57			97.59
Schindlbeck et al. (2018)	IODP 350, site 1436A	350-U1436A-9H-2-78-80	350-U1436A-9H-2-78-80-10	Izu volcanic arc	32.398	140.365	glass shard	56.32	0.810559	53.32	2.57	0.2866	12.26	1.1727	4.67	9.18	0.1959	13.85	0.0865		97.5917
Barnes et al. (2010)	ODP Leg 126, site 782A	782A-19X-2-24-26	782A-19X-2-24-26	Izu volcanic arc	30.861	141.314	plagioclase-hosted melt inclusion		6.031	52.51	1.89	0.22	10.4	0.86	5.85	10.42	0.17	15.17	0.11		97.6			933
Schindlbeck et al. (2018)	IODP 350, site 1436A	350-U1436A-3H-3-28-30	350-U1436A-3H-3-28-30-4	Izu volcanic arc	32.398	140.365	glass shard	12.95	0.207005	50.13	1.74	0.2933	15.24	1.3981	6.05	9.58	0.3161	12.76	0.0948		97.6023
Schindlbeck et al. (2018)	IODP 350, site 1436A	350-U1436A-9H-2-95-97	350-U1436A-9H-2-95-97-10	Izu volcanic arc	32.398	140.365	glass shard	56.49	0.813345	53.13	2.69	0.3524	13.89	1.424	4.18	8.77	0.1958	12.89	0.0816		97.6038
Straub (2003)	ODP Leg 126, site 782A	782A-18X-1-15-17	782A-18X-1-15-17	Izu volcanic arc	30.861	141.314	plagioclase-hosted melt inclusion		5.349	53.24	1.94	0.52	14.38	1.19	5.41	8.34	0.3	12.13	0.16		97.61
Barnes et al. (2010)	ODP Leg 126, site 782A	782A-17X-1-56-58	782A-17X-1-56-58	Izu volcanic arc	30.861	141.314	glass shards from tephra		4.793	56	2.81	0.34	11.13	1.06	3.56	8	0.24	14.4	0.07		97.61			1250
Straub and Layne (2003)	ODP Leg 126, site 782A	782A-19X-1-147-149	782A-19X-1-147-149	Izu volcanic arc	30.861	141.314	plagioclase-hosted melt inclusion		6.03	52.51	1.89	0.23	10.4	0.86	5.85	10.42	0.17	15.17	0.11		97.61	2.83	82	933	13	5.5
Straub (2003)	ODP Leg 126, site 782A	782A-19X-1-147-149	782A-19X-1-147-149-12B	Izu volcanic arc	30.861	141.314	plagioclase-hosted melt inclusion		6.03	52.51	1.89	0.23	10.4	0.86	5.85	10.42	0.17	15.17	0.11		97.61	2.83	82	933	13	5.5
Straub and Layne (2003)	ODP Leg 126, site 782A	782A-19X-1-147-149	782A-19X-1-147-149	Izu volcanic arc	30.861	141.314	plagioclase-hosted melt inclusion		6.03	52.51	1.89	0.23	10.4	0.86	5.85	10.42	0.17	15.17	0.11		97.61	2.39	82	933	13	5.5
Barnes et al. (2010)	ODP Leg 126, site 782A	782A-14X-5-14-17	782A-14X-5-14-17	Izu volcanic arc	30.861	141.314	glass shards from tephra		3.52	53.94	2.42	0.25	11.23	0.71	4.65	9.68	0.14	14.5	0.1		97.62			980
Bryant et al. (2003)	ODP Leg 126, site 782A	782A-20X-CC-9-11	782A-20X-CC-9-11-16A	Izu volcanic arc	30.861	141.314	glass shard	184.1	6.1	55.86	2.35	0.28	13.62	0.97	4.21	8.89	0.16	13.66			97.62
Schindlbeck et al. (2018)	IODP 350, site 1436A	350-U1436A-7H-4-16-18	350-U1436A-7H-4-16-18-15	Izu volcanic arc	32.398	140.365	glass shard	47.77	0.67045	54.26	2.89	0.3093	12.63	1.1769	3.74	8.36	0.2496	13.93	0.0808		97.6266
Schindlbeck et al. (2018)	IODP 350, site 1436A	350-U1436A-4H-4-63-65	350-U1436A-4H-4-63-65-15	Izu volcanic arc	32.398	140.365	glass shard	21.93	0.319582	53.38	2.49	0.2475	12.59	1.1761	4.09	9.06	0.2449	14.25	0.1049		97.6334
Straub and Layne (2002, 2003); Straub et al. (2004)	ODP Leg 126, site 782A	782A-11X-3-0-1	782A-11X-3-0-1-19-3	Izu volcanic arc	30.861	141.314	glass shard		2.84	52.8	2.59	0.2	12.17	1.1	4.32	9.03	0.23	15.07	0.13		97.64	2.7	211	1190	9.5	4.01		2.04	167.8	21.4	31.8	0.24	0.17	32.4	1.39	4.33	0.79	4.86	1.91	0.79	2.81	0.48	3.72	0.8	2.36	0.35	2.49	0.37	1.09
Straub et al. (2004)	ODP Leg 126, site 782A	782A-11X-3-0-1	782A-11X-3-0-1-19-3	Izu volcanic arc	30.861	141.314	glass shards from tephra		2.842	52.8	2.59	0.2	12.17	1.1	4.32	9.03	0.23	15.07	0.13		97.64				10	4		2.04	167.8	21.4	31.8	0.24	0.17	32.4	1.39	4.33	0.79	4.86	1.91	0.79	2.81	0.48	3.72	0.8	2.36	0.35	2.49	0.37	1.09
Straub (2003)	ODP Leg 126, site 782A	782A-11X-3-0-1	782A-11X-3-0-1-3	Izu volcanic arc	30.861	141.314	glass shards from tephra		2.84	52.8	2.59	0.2	12.17	1.1	4.32	9.03	0.23	15.07	0.13		97.64	2.7	211	1190	9.5	4.01
Straub and Layne (2003)	ODP Leg 126, site 782A	782A-11X-3-0-1	782A-11X-3-0-1	Izu volcanic arc	30.861	141.314	glass shards from tephra		2.84	52.8	2.59	0.2	12.17	1.1	4.32	9.03	0.23	15.07	0.13		97.64	2.5	211	1190	9.5	4.01
Schindlbeck et al. (2018)	IODP 350, site 1436A	350-U1436A-2H-3-18-20	350-U1436A-2H-3-18-20-1	Izu volcanic arc	32.398	140.365	glass shard	4.55	0.088	56.31	2.4	0.3792	11.96	1.0254	3.26	8.22	0.2231	13.81	0.0574		97.6451					3.07	11.14	2.183	45.11	7.62	13.13	0.242	0.12	26.92	0.809	2.4	0.41	2.19	0.871	0.366	1.007	0.213	1.251	0.308	0.953	0.13	0.764	0.155	0.345
Barnes et al. (2010)	ODP Leg 126, site 782A	782A-11X-3-0-1	782A-11X-3-0-1	Izu volcanic arc	30.861	141.314	glass shards from tephra		2.842	54.71	3.04	0.23	11.53	1.08	4.01	7.98	0.27	14.7	0.1		97.65			1200
Straub and Layne (2003)	ODP Leg 126, site 782A	782A-26X-5-147-149	782A-26X-5-147-149	Izu volcanic arc	30.861	141.314	glass shard		10.5	56.98	2.82	0.44	9.51	1.14	3.46	7.62	0.24	15.28	0.16		97.65		260	1132	14.8	6.6
Barnes et al. (2010)	ODP Leg 126, site 782A	782A-6H-6-55-57	782A-6H-6-55-57	Izu volcanic arc	30.861	141.314	glass shards from tephra		1.925	53.05	2.39	0.3	12.19	0.95	4.3	9.63	0.17	14.5	0.17		97.65			970
Barnes et al. (2010)	ODP Leg 126, site 782A	782A-11X-3-0-1	782A-11X-3-0-1	Izu volcanic arc	30.861	141.314	glass shards from tephra		2.842	52.8	2.59	0.21	12.17	1.1	4.32	9.03	0.23	15.07	0.13		97.65			1190
Barnes et al. (2010)	ODP Leg 126, site 782A	782A-1H-3-129-130	782A-1H-3-129-130	Izu volcanic arc	30.861	141.314	glass shards from tephra		0.114	56.61	3.07	0.31	9.72	0.9	3.21	7.49	0.25	15.9	0.19		97.65			1030
Barnes et al. (2010)	ODP Leg 126, site 782A	782A-39X-1-21-23	782A-39X-1-21-23	Izu volcanic arc	30.861	141.314	glass shards from tephra		33.257	56.43	2.77	0.42	11.12	0.89	3.14	7.71	0.23	14.82	0.12		97.65			2107
Schindlbeck et al. (2018)	IODP 350, site 1436A	350-U1436A-5H-5-132-134	350-U1436A-5H-5-132-134-15	Izu volcanic arc	32.398	140.365	glass shard	33.08	0.455442	51.22	1.72	0.2329	12.18	0.8007	6.39	11.24	0.1634	13.69	0.0173		97.6543
Barnes et al. (2010)	ODP Leg 126, site 782A	782A-33X-5-36-39	782A-33X-5-36-39	Izu volcanic arc	30.861	141.314	glass shards from tephra		14.201	51.76	2.46	0.47	12.75	1.09	4.27	9.25	0.25	15.22	0.14		97.66			1560
Schindlbeck et al. (2018)	IODP 350, site 1436A	350-U1436A-8H-1-5-7	350-U1436A-8H-1-5-7-12	Izu volcanic arc	32.398	140.365	glass shard	50.45	0.714367	53.9	2.78	0.3079	12.18	1.1456	3.73	8.54	0.2262	14.74	0.1154		97.6651
Barnes et al. (2010)	ODP Leg 126, site 782A	782A-25X-4-111-113	782A-25X-4-111-113	Izu volcanic arc	30.861	141.314	glass shards from tephra		9.757	51.73	2.07	0.3	12.01	0.85	5.89	10.47	0.1	14.1	0.15		97.67			820
Barnes et al. (2010)	ODP Leg 126, site 782A	782A-13X-3-51-53	782A-13X-3-51-53	Izu volcanic arc	30.861	141.314	glass shards from tephra		3.262	55.11	2.74	0.39	10.75	0.95	3.79	8.32	0.21	15.26	0.15		97.67			1668
Barnes et al. (2010)	ODP Leg 126, site 782A	782A-14X-2-142-144	782A-14X-2-142-144	Izu volcanic arc	30.861	141.314	glass shards from tephra		3.454	56.22	3.13	0.41	11.5	0.99	3.29	7.65	0.15	14.2	0.15		97.69			1670
Straub and Layne (2003)	ODP Leg 126, site 782A	782A-13X-3-51-53	782A-13X-3-51-53	Izu volcanic arc	30.861	141.314	glass shard		3.26	55.18	2.74	0.3	10.75	0.96	3.74	8.36	0.23	15.28	0.16		97.7		195	1178	17.6	7.1
Barnes et al. (2010)	ODP Leg 126, site 782A	782A-13X-3-51-53	782A-13X-3-51-53	Izu volcanic arc	30.861	141.314	glass shards from tephra		3.262	55.12	2.76	0.4	10.82	0.98	3.8	8.22	0.16	15.29	0.15		97.7			1692
Straub (2003)	ODP Leg 126, site 782A	782A-13X-3-51-53	782A-13X-3-51-53-D5	Izu volcanic arc	30.861	141.314	glass shards from tephra		3.26	55.18	2.74	0.3	10.75	0.96	3.74	8.36	0.23	15.28	0.16		97.7		195	1178	17.6	7.1
Straub and Layne (2003)	ODP Leg 126, site 782A	782A-13X-3-51-53	782A-13X-3-51-53	Izu volcanic arc	30.861	141.314	glass shards from tephra		3.26	55.18	2.74	0.3	10.75	0.96	3.74	8.36	0.23	15.28	0.16		97.7	2.4	195	1178	17.6	7.1
Barnes et al. (2010)	ODP Leg 126, site 782A	782A-17X-2-7-8	782A-17X-2-7-8	Izu volcanic arc	30.861	141.314	glass shards from tephra		4.854	55.86	2.76	0.33	11.54	1.11	3.39	8.05	0.22	14.33	0.11		97.7			1538
Barnes et al. (2010)	ODP Leg 126, site 782A	782A-19X-2-24-26	782A-19X-2-24-26	Izu volcanic arc	30.861	141.314	glass shards from tephra		6.031	52.31	1.98	0.21	11.65	0.9	6.09	10.23	0.22	14	0.11		97.7			350
Schindlbeck et al. (2018)	IODP 350, site 1436A	350-U1436A-8H-2-90-92	350-U1436A-8H-2-90-92-8	Izu volcanic arc	32.398	140.365	glass shard	52.48	0.747632	54.48	2.76	0.2945	12.28	1.1184	3.67	8.39	0.2139	14.41	0.0849		97.7017
Schindlbeck et al. (2018)	IODP 350, site 1436A	350-U1436A-9H-2-78-80	350-U1436A-9H-2-78-80-7	Izu volcanic arc	32.398	140.365	glass shard	56.32	0.810559	53.23	2.63	0.3079	13.1	1.1139	4.56	8.88	0.1712	13.66	0.0615		97.7145
Barnes et al. (2010)	ODP Leg 126, site 782A	782A-39X-1-21-23	782A-39X-1-21-23	Izu volcanic arc	30.861	141.314	glass shards from tephra		33.257	54.69	2.93	0.29	12.13	1.2	3.6	8.38	0.17	14.2	0.13		97.72			2470
Barnes et al. (2010)	ODP Leg 126, site 782A	782A-25X-4-111-113	782A-25X-4-111-113	Izu volcanic arc	30.861	141.314	glass shards from tephra		9.757	51.86	2.13	0.32	11.83	0.77	5.99	10.37	0.23	14.1	0.12		97.72			510
Barnes et al. (2010)	ODP Leg 126, site 782A	782A-13X-3-51-53	782A-13X-3-51-53	Izu volcanic arc	30.861	141.314	glass shards from tephra		3.262	54.71	2.82	0.36	10.83	0.95	3.87	8.44	0.2	15.4	0.14		97.72			1600
Straub et al. (2004)	ODP Leg 126, site 782A	782A-33X-5-36-39	782A-33X-5-36-39	Izu volcanic arc	30.861	141.314	glass shard		14.2012	51.51	2.34	0.43	13.12	1.01	4.51	9.31	0.17	15.18	0.14		97.72				14	6.2		6.56	221.7	22.2	34.2	0.27	0.56	70.3	2.2	5.49	0.99	5.64	2.07	0.71	2.93	0.5	3.58	0.81	2.28	0.37	2.53	0.39	1.15
Straub and Layne (2003)	ODP Leg 126, site 782A	782A-33X-5-36-39	782A-33X-5-36-39	Izu volcanic arc	30.861	141.314	glass shard		14.2	51.51	2.34	0.43	13.12	1.01	4.51	9.31	0.17	15.18	0.14		97.72	2.3	174	1513	14.2	6.2
Straub et al. (2004)	ODP Leg 126, site 782A	782A-33X-5-36-39	782A-33X-5-36-39-94B1	Izu volcanic arc	30.861	141.314	glass shards from tephra		14.201	51.51	2.34	0.43	13.12	1.01	4.51	9.31	0.17	15.18	0.14		97.72				14	6.2		6.56	221.7	22.2	34.2	0.27	0.56	70.3	2.2	5.49	0.99	5.64	2.07	0.71	2.93	0.5	3.58	0.81	2.28	0.37	2.53	0.39	1.15
Straub (2003)	ODP Leg 126, site 782A	782A-33X-5-36-39	782A-33X-5-36-39-B1	Izu volcanic arc	30.861	141.314	glass shards from tephra		14.2	51.51	2.34	0.43	13.12	1.01	4.51	9.31	0.17	15.18	0.14		97.72	2.3	174	1513	14.2	6.2
Straub and Layne (2003)	ODP Leg 126, site 782A	782A-33X-5-36-39	782A-33X-5-36-39	Izu volcanic arc	30.861	141.314	glass shards from tephra		14.2	51.51	2.34	0.43	13.12	1.01	4.51	9.31	0.17	15.18	0.14		97.72	2.4	174	1513	14.2	6.2
Barnes et al. (2010)	ODP Leg 126, site 782A	782A-39X-1-21-23	782A-41X-4-71-73	Izu volcanic arc	30.861	141.314	glass shards from tephra		39.981	55.3	2.57	0.35	10.67	1.14	4.34	8.79	0.21	14.3	0.06		97.73			1140
Barnes et al. (2010)	ODP Leg 126, site 782A	782A-29X-3-9-11	782A-29X-3-9-11	Izu volcanic arc	30.861	141.314	glass shards from tephra		11.514	52.61	2.35	0.28	12.25	1.09	4.75	9.71	0.18	14.4	0.11		97.73			370
Barnes et al. (2010)	ODP Leg 126, site 782A	782A-14X-5-14-17	782A-14X-5-14-17	Izu volcanic arc	30.861	141.314	glass shards from tephra		3.52	54.04	2.37	0.35	10.78	0.75	4.82	9.66	0.24	14.6	0.13		97.74			700
Straub et al. (2004)	ODP Leg 126, site 782A	782A‐15X‐3‐9‐10	782A‐15X‐3‐9‐10	Izu volcanic arc	30.861	141.314	glass shard		3.78	52.28	2.34	0.38	12.96	1.26	4.48	9.22	0.19	14.63	0.11		97.74					6.7		4.72	171.5	22.1	31.8	0.26	0.51	54.5	1.64	5.09	0.93	5.53	2.09	0.79	3.03	0.56	4.07	0.86	2.61	0.38	2.62	0.4	1.15
Barnes et al. (2010)	ODP Leg 126, site 782A	782A-23X-6-66-68	782A-23X-6-66-68	Izu volcanic arc	30.861	141.314	glass shards from tephra		8.751	56.52	2.82	0.41	11.46	1.23	3.25	7.74	0.18	14.13			97.74
Schindlbeck et al. (2018)	IODP 350, site 1436A	350-U1436A-9H-2-95-97	350-U1436A-9H-2-95-97-9	Izu volcanic arc	32.398	140.365	glass shard	56.49	0.813345	52.94	2.65	0.314	12.93	1.1747	4.71	9.2	0.2041	13.51	0.1094		97.7422
Barnes et al. (2010)	ODP Leg 126, site 782A	782A-19X-2-24-26	782A-19X-2-24-26	Izu volcanic arc	30.861	141.314	plagioclase-hosted melt inclusion		6.031	53.51	2.16	0.26	10.48	0.68	5.45	10.01	0.18	14.93	0.09		97.75			872
Barnes et al. (2010)	ODP Leg 126, site 782A	782A-13X-3-51-53	782A-13X-3-51-53	Izu volcanic arc	30.861	141.314	glass shards from tephra		3.262	55.18	2.74	0.36	10.75	0.96	3.74	8.36	0.23	15.28	0.16		97.76			1178
Barnes et al. (2010)	ODP Leg 126, site 782A	782A-19X-2-24-26	782A-19X-2-24-26	Izu volcanic arc	30.861	141.314	plagioclase-hosted melt inclusion		6.031	52.46	2.25	0.31	11.97	0.85	5.36	9.64	0.22	14.59	0.11		97.76			1123
Bryant et al. (2003)	ODP Leg 126, site 782A	782A-14X2-141-143	782A-14X2-141-143-8A	Izu volcanic arc	30.861	141.314	glass shard	127.5	3.9	55.61	2.68	0.38	11.86	0.9	3.95	9.03	0.05	15.56			97.77
Barnes et al. (2010)	ODP Leg 126, site 782A	782A-33X-5-36-39	782A-33X-5-36-39	Izu volcanic arc	30.861	141.314	glass shards from tephra		14.201	51.51	2.34	0.48	13.12	1.01	4.51	9.31	0.17	15.18	0.14		97.77			1513
Schindlbeck et al. (2018)	IODP 350, site 1436A	350-U1436A-3H-2-25-27	350-U1436A-3H-2-25-27-15	Izu volcanic arc	32.398	140.365	glass shard	12.95	0.207005	54.44	2.74	0.4028	14.29	1.548	3.04	8.04	0.2165	12.88	0.1773		97.7746
Schindlbeck et al. (2018)	IODP 350, site 1436A	350-U1436A-9H-4-10-12	350-U1436A-9H-4-10-12-1	Izu volcanic arc	32.398	140.365	glass shard	56.64	0.815803	52.99	2.65	0.2802	11.95	0.9457	4.84	9.53	0.2017	14.28	0.1116		97.7792					7.19	43.58	3.99	137.58	21.21	41.65	0.381	0.505	83.69	1.763	5.87	1.073	5.41	2.6	0.882	2.35	0.504	2.99	0.787	2.27	0.28	2.84	0.379	1.23
Straub and Layne (2003)	ODP Leg 126, site 782A	782A-11X-3-0-1	782A-11X-3-0-1-19-7	Izu volcanic arc	30.861	141.314	glass shard		2.84	52.74	2.48	0.21	12.3	1.11	4.46	9.18	0.28	14.9	0.12		97.78	2.1	192	1160	9.7	4.02
Barnes et al. (2010)	ODP Leg 126, site 782A	782A-11X-3-0-1	782A-11X-3-0-1	Izu volcanic arc	30.861	141.314	glass shards from tephra		2.842	52.74	2.48	0.21	12.3	1.11	4.46	9.18	0.28	14.9	0.12		97.78			1160
Straub (2003)	ODP Leg 126, site 782A	782A-11X-3-0-1	782A-11X-3-0-1-7	Izu volcanic arc	30.861	141.314	glass shards from tephra		2.84	52.74	2.48	0.21	12.3	1.11	4.46	9.18	0.28	14.9	0.12		97.78	2.1	192	1160	9.7	4.02
Straub and Layne (2003)	ODP Leg 126, site 782A	782A-11X-3-0-1	782A-11X-3-0-1	Izu volcanic arc	30.861	141.314	glass shards from tephra		2.84	52.74	2.48	0.21	12.3	1.11	4.46	9.18	0.28	14.9	0.12		97.78	2.3	192	1160	9.7	4.02
Schindlbeck et al. (2018)	IODP 350, site 1436A	350-U1436A-8H-2-90-92	350-U1436A-8H-2-90-92-13	Izu volcanic arc	32.398	140.365	glass shard	52.48	0.747632	54.2	2.82	0.3041	12.2	1.0949	3.8	8.56	0.1865	14.54	0.0762		97.7817
Schindlbeck et al. (2018)	IODP 350, site 1436A	350-U1436A-8H-3-58-60	350-U1436A-8H-3-58-60-10	Izu volcanic arc	32.398	140.365	glass shard	53.56	0.765331	53.98	2.74	0.3198	12.42	1.0864	3.94	8.52	0.1782	14.51	0.0932		97.7876
Barnes et al. (2010)	ODP Leg 126, site 782A	782A-21X-5-43-45	782A-21X-5-43-45	Izu volcanic arc	30.861	141.314	glass shards from tephra		7.474	52.95	2.36	0.3	11.46	1.04	4.38	8.89	0.22	16.1	0.09		97.79			1030
Barnes et al. (2010)	ODP Leg 126, site 782A	782A-6H-6-88-90	782A-6H-6-88-90	Izu volcanic arc	30.861	141.314	glass shards from tephra		1.938	55.42	2.82	0.38	11.3	1.02	3.54	8.17	0.21	14.93			97.79
Barnes et al. (2010)	ODP Leg 126, site 782A	782A-19X-2-24-26	782A-19X-2-24-26	Izu volcanic arc	30.861	141.314	glass shards from tephra		6.031	54.84	2.67	0.34	11.75	0.92	4.02	8.83	0.28	14	0.14		97.79			1680
Barnes et al. (2010)	ODP Leg 126, site 782A	782A-6H-6-88-90	782A-6H-6-88-90	Izu volcanic arc	30.861	141.314	glass shards from tephra		1.938	55.59	2.97	0.33	11.36	0.94	3.59	8.14	0.22	14.65			97.79
Schindlbeck et al. (2018)	IODP 350, site 1436A	350-U1436A-7H-3-93-95	350-U1436A-7H-3-93-95-8	Izu volcanic arc	32.398	140.365	glass shard	47.04	0.658487	52.09	2.54	0.2534	13.28	1.194	5.18	9.58	0.1354	13.44	0.1242		97.817
Schindlbeck et al. (2018)	IODP 350, site 1436A	350-U1436A-5H-2-137-139	350-U1436A-5H-2-137-139-10	Izu volcanic arc	32.398	140.365	glass shard	28.7	0.402073	52.78	2.71	0.2745	13.64	1.1735	3.99	8.82	0.2126	14.13	0.0878		97.8184
Barnes et al. (2010)	ODP Leg 126, site 782A	782A-21X-3-26-27	782A-21X-3-26-27	Izu volcanic arc	30.861	141.314	glass shards from tephra		7.267	51.07	2.37	0.31	13.91	1.39	5.4	9.94	0.21	13.1	0.12		97.82			250
Schindlbeck et al. (2018)	IODP 350, site 1436A	350-U1436A-8H-2-90-92	350-U1436A-8H-2-90-92-11	Izu volcanic arc	32.398	140.365	glass shard	52.48	0.747632	54.28	2.61	0.3134	13.24	1.2218	4.05	8.33	0.2703	13.42	0.0891		97.8246
Schindlbeck et al. (2018)	IODP 350, site 1436A	350-U1436A-9H-4-67-69	350-U1436A-9H-4-67-69-2	Izu volcanic arc	32.398	140.365	glass shard	56.64	0.815803	53.17	2.63	0.3421	13.12	1.2169	4.56	9.11	0.1187	13.46	0.1001		97.8278					3.03165	18.1231	1.72044	54.1814	9.72969	19.2506	0.175385	0.212967	34.3462	0.776705	2.58693	0.494836	2.85209	0.918683	0.417583	1.31539	0.243242	1.8311	0.369561	1.08154	0.180813	1.11912	0.174759	0.68066
Schindlbeck et al. (2018)	IODP 350, site 1436A	350-U1436A-1H-2-91-93	350-U1436A-1H-2-91-93-8	Izu volcanic arc	32.398	140.365	glass shard	2.41	0.0438292	51.45	2.17	0.1942	13.29	0.8969	5.38	10.24	0.2113	13.89	0.1089		97.8313
Schindlbeck et al. (2018)	IODP 350, site 1436A	350-U1436A-9H-4-75-77	350-U1436A-9H-4-75-77-9	Izu volcanic arc	32.398	140.365	glass shard	56.64	0.815803	53	2.46	0.3345	13.03	1.1581	4.39	9.22	0.1471	14	0.0937		97.8334
Barnes et al. (2010)	ODP Leg 126, site 782A	782A-23X-4-107-109	782A-23X-4-107-109	Izu volcanic arc	30.861	141.314	glass shards from tephra		8.595	52.13	2.19	0.32	13.47	1.25	4.95	9.32	0.22	13.99			97.84
Straub and Layne (2002); Straub et al. (2004)	ODP Leg 126, site 782A	782A-15X-3-9-10	782A-15X-3-9-10	Izu volcanic arc	30.861	141.314	glass shard		3.78006	52.28	2.34	0.38	12.96	1.26	4.48	9.22	0.19	14.63	0.11		97.85				22	6.7		4.72	171.5	22.1	31.8	0.26	0.51	54.5	1.64	5.09	0.93	5.53	2.09	0.79	3.03	0.56	4.07	0.86	2.61	0.38	2.62	0.4	1.15
Straub and Layne (2003)	ODP Leg 126, site 782A	782A-15X-3-9-10	782A-15X-3-9-10	Izu volcanic arc	30.861	141.314	glass shard		3.78	52.28	2.34	0.38	12.96	1.26	4.48	9.22	0.19	14.63	0.11		97.85	2.2	151	1077	22.3	6.65
Straub et al. (2004)	ODP Leg 126, site 782A	782A-15X-3-9-10	782A-15X-3-9-10-29-B1	Izu volcanic arc	30.861	141.314	glass shards from tephra		3.845	52.28	2.34	0.38	12.96	1.26	4.48	9.22	0.19	14.63	0.11		97.85				22	6.7		4.72	171.5	22.1	31.8	0.26	0.51	54.5	1.64	5.09	0.93	5.53	2.09	0.79	3.03	0.56	4.07	0.86	2.61	0.38	2.62	0.4	1.15
Barnes et al. (2010)	ODP Leg 126, site 782A	782A-15X-3-9-10	782A-15X-3-9-10	Izu volcanic arc	30.861	141.314	glass shards from tephra		3.78	52.28	2.34	0.38	12.96	1.26	4.48	9.22	0.19	14.63	0.11		97.85			1077
Straub (2003)	ODP Leg 126, site 782A	782A-15X-3-9-10	782A-15X-3-9-10-B1	Izu volcanic arc	30.861	141.314	glass shards from tephra		3.78	52.28	2.34	0.38	12.96	1.26	4.48	9.22	0.19	14.63	0.11		97.85	2.2	151	1077	22.3	6.65
Straub and Layne (2003)	ODP Leg 126, site 782A	782A-15X-3-9-10	782A-15X-3-9-10	Izu volcanic arc	30.861	141.314	glass shards from tephra		3.78	52.28	2.34	0.38	12.96	1.26	4.48	9.22	0.19	14.63	0.11		97.85	2.3	151	1077	22.3	6.65
Schindlbeck et al. (2018)	IODP 350, site 1436A	350-U1436A-4H-4-63-65	350-U1436A-4H-4-63-65-9	Izu volcanic arc	32.398	140.365	glass shard	21.93	0.319582	54.57	2.53	0.2704	11.98	1.1577	3.77	8.8	0.2562	14.48	0.0438		97.8581
Barnes et al. (2010)	ODP Leg 126, site 782A	782A-19X-2-24-26	782A-19X-2-24-26	Izu volcanic arc	30.861	141.314	plagioclase-hosted melt inclusion		6.031	52.49	2.18	0.29	13.28	0.86	4.97	9.48	0.25	13.96	0.1		97.86			1007
Straub and Layne (2003)	ODP Leg 126, site 782A	782A-39-X-1-21-23	782A-39-X-1-21-23	Izu volcanic arc	30.861	141.314	plagioclase-hosted melt inclusion		29.61	53.12	2.14	0.27	10.48	0.79	5.05	10.24	0.22	15.44	0.11		97.86	2.14	94	1003	11	6.1
Straub and Layne (2003)	ODP Leg 126, site 782A	782A-39X-1-21-23	782A-39X-1-21-23	Izu volcanic arc	30.861	141.314	plagioclase-hosted melt inclusion		29.6	53.12	2.14	0.27	10.48	0.79	5.05	10.24	0.22	15.44	0.11		97.86	2.64	94	1003	11	6.1
Straub (2003)	ODP Leg 126, site 782A	782A-39X-1-21-23	782A-39X-1-21-23-6A	Izu volcanic arc	30.861	141.314	plagioclase-hosted melt inclusion		29.6	53.12	2.14	0.27	10.48	0.79	5.05	10.24	0.22	15.44	0.11		97.86	2.64	94	1003	11	6.1
Barnes et al. (2010)	ODP Leg 126, site 782A	782A-39X-1-21-23	782A-39X-1-21-23	Izu volcanic arc	30.861	141.314	plagioclase-hosted melt inclusion		33.257	53.12	2.14	0.27	10.48	0.79	5.05	10.24	0.22	15.44	0.11		97.86			1003
Barnes et al. (2010)	ODP Leg 126, site 782A	782A-11X-3-0-1	782A-11X-3-0-1	Izu volcanic arc	30.861	141.314	glass shards from tephra		2.842	53.33	2.64	0.23	11.96	1.1	4.3	8.93	0.28	14.98	0.12		97.87			1187
Barnes et al. (2010)	ODP Leg 126, site 782A	782A-29X-3-9-11	782A-29X-3-9-11	Izu volcanic arc	30.861	141.314	glass shards from tephra		11.514	51.83	2.23	0.27	12.31	1.01	5.47	10.06	0.21	14.4	0.08		97.87			400
Schindlbeck et al. (2018)	IODP 350, site 1436A	350-U1436A-5H-6-6-8	350-U1436A-5H-6-6-8-9	Izu volcanic arc	32.398	140.365	glass shard	33.32	0.458366	51.3	2.66	0.4506	15.34	1.5626	4.61	9.18	0.1805	12.41	0.1852		97.8789
Barnes et al. (2010)	ODP Leg 126, site 782A	782A-19X-2-24-26	782A-19X-2-24-26	Izu volcanic arc	30.861	141.314	glass shards from tephra		6.031	53.47	2.21	0.25	10.97	0.82	5.18	9.91	0.26	14.7	0.11		97.88			910
Schindlbeck et al. (2018)	IODP 350, site 1436A	350-U1436A-8H-2-90-92	350-U1436A-8H-2-90-92-4	Izu volcanic arc	32.398	140.365	glass shard	52.48	0.747632	54.56	2.79	0.315	12.28	1.1924	3.65	8.39	0.1512	14.49	0.069		97.8876
Barnes et al. (2010)	ODP Leg 126, site 782A	782A-23X-6-66-68	782A-23X-6-66-68	Izu volcanic arc	30.861	141.314	glass shards from tephra		8.751	55.39	2.65	0.41	11.44	1.17	3.61	8.25	0.21	14.77			97.9
Barnes et al. (2010)	ODP Leg 126, site 782A	782A-6H-6-55-57	782A-6H-6-55-57	Izu volcanic arc	30.861	141.314	glass shards from tephra		1.925	53.55	2.17	0.3	12.49	0.91	4.53	9.42	0.23	14.2	0.1		97.9			1090
Straub et al. (2004)	ODP Leg 126, site 782A	782A‐23X‐4‐107‐109	782A‐23X‐4‐107‐109	Izu volcanic arc	30.861	141.314	glass shard		8.59	51.72	2.19	0.34	13.59	1.21	4.99	9.53	0.26	14.05	0.1		97.9					7		4.65	179.2	22.8	34.7	0.32	0.47	70.9	1.73	4.93	0.94	5.27	2.01	0.81	3.32	0.56	3.83	0.84	2.47	0.39	2.63	0.38	1.27
Barnes et al. (2010)	ODP Leg 126, site 782A	782A-14X-5-14-17	782A-14X-5-14-17	Izu volcanic arc	30.861	141.314	glass shards from tephra		3.52	54.21	2.39	0.32	11.3	0.77	4.62	9.54	0.26	14.4	0.09		97.9			680
Barnes et al. (2010)	ODP Leg 126, site 782A	782A-17X-2-7-8	782A-17X-2-7-8	Izu volcanic arc	30.861	141.314	glass shards from tephra		4.854	56.02	2.76	0.34	11.44	1.11	3.43	8.01	0.19	14.51	0.09		97.9			1473
Barnes et al. (2010)	ODP Leg 126, site 782A	782A-17X-2-7-8	782A-17X-2-7-8	Izu volcanic arc	30.861	141.314	glass shards from tephra		4.854	55.98	2.77	0.32	11.74	1.08	3.35	8.05	0.27	14.25	0.1		97.91			1875
Bryant et al. (2003)	ODP Leg 126, site 782A	782A-35X-6-130-136	782A-35X-6-130-136-24A	Izu volcanic arc	30.861	141.314	glass shard		24	55.92	2.9	0.51	12.69	1.16	3.67	8.44	0.2	14.51			97.91
Barnes et al. (2010)	ODP Leg 126, site 782A	782A-6H-6-55-57	782A-6H-6-55-57	Izu volcanic arc	30.861	141.314	glass shards from tephra		1.925	53.48	2.4	0.33	12.1	0.97	4.38	9.65	0.29	14.2	0.11		97.91			1000
Straub et al. (2004)	ODP Leg 126, site 782A	782A‐11X‐3‐0‐1	782A‐11X‐3‐0‐1	Izu volcanic arc	30.861	141.314	glass shard		2.84	53.16	2.76	0.22	12.31	1.1	4.2	8.9	0.22	15.05	0.12		97.91					3.9		2.22	171.2	21.9	33.3	0.27	0.19	34.5	1.44	4.61	0.85	5.12	2.06	0.83	2.98	0.52	3.99	0.83	2.52	0.37	2.58	0.41	1.14
Barnes et al. (2010)	ODP Leg 126, site 782A	782A-17X-1-56-58	782A-17X-1-56-58	Izu volcanic arc	30.861	141.314	glass shards from tephra		4.793	56.61	2.92	0.33	11.09	0.98	3.28	7.65	0.37	14.6	0.08		97.91			1300
Barnes et al. (2010)	ODP Leg 126, site 782A	782A-19X-2-24-26	782A-19X-2-24-26	Izu volcanic arc	30.861	141.314	plagioclase-hosted melt inclusion		6.031	55.3	2.52	0.38	11.37	0.75	3.68	8.44	0.22	15.14	0.11		97.91			980
Barnes et al. (2010)	ODP Leg 126, site 782A	782A-28X-1-97-99	782A-28X-1-97-99	Izu volcanic arc	30.861	141.314	glass shards from tephra		11.223	56.24	2.34	0.66	14.94	1.47	2.61	7.72	0.31	11.5	0.13		97.92			1450
Straub (2003)	ODP Leg 126, site 782A	782A-2H-4-113-114	782A-2H-4-113-114	Izu volcanic arc	30.861	141.314	plagioclase-hosted melt inclusion		0.546	52.72	1.9	0.53	8.91	0.53	6.03	11.19	0.17	15.75	0.19		97.92
Barnes et al. (2010)	ODP Leg 126, site 782A	782A-19X-2-24-26	782A-19X-2-24-26	Izu volcanic arc	30.861	141.314	plagioclase-hosted melt inclusion		6.031	54.27	1.9	0.24	8.8	0.45	5.65	10.51	0.16	15.85	0.09		97.92			668
Barnes et al. (2010)	ODP Leg 126, site 782A	782A-25X-4-111-113	782A-25X-4-111-113	Izu volcanic arc	30.861	141.314	glass shards from tephra		9.757	51.34	1.95	0.24	11.51	0.71	6.26	11.16	0.2	14.4	0.15		97.92			910
Schindlbeck et al. (2018)	IODP 350, site 1436A	350-U1436A-9H-4-75-77	350-U1436A-9H-4-75-77-6	Izu volcanic arc	32.398	140.365	glass shard	56.64	0.815803	53.14	2.67	0.3521	13.25	1.1914	4.46	9.01	0.207	13.55	0.0954		97.9259
Schindlbeck et al. (2018)	IODP 350, site 1436A	350-U1436A-2H-4-88-90	350-U1436A-2H-4-88-90-10	Izu volcanic arc	32.398	140.365	glass shard	4.55	0.088	55.68	3.12	0.3774	11.33	1.1036	3.4	7.8	0.2444	14.76	0.1122		97.9276
Schindlbeck et al. (2018)	IODP 350, site 1436A	350-U1436A-4H-5-39-41	350-U1436A-4H-5-39-41-15	Izu volcanic arc	32.398	140.365	glass shard	23.19	0.334935	55.66	2.81	0.2356	11.05	1.0838	3.58	8.49	0.2702	14.73	0.0273		97.9369
Straub and Layne (2003)	ODP Leg 126, site 782A	782A-13X-3-51-53	782A-13X-3-51-53	Izu volcanic arc	30.861	141.314	glass shard		3.26	55.29	2.83	0.37	10.86	0.94	3.79	8.26	0.19	15.26	0.15		97.94		215	1565	17.5	6.93
Straub (2003)	ODP Leg 126, site 782A	782A-13X-3-51-53	782A-13X-3-51-53-B2	Izu volcanic arc	30.861	141.314	glass shards from tephra		3.26	55.29	2.83	0.37	10.86	0.94	3.79	8.26	0.19	15.26	0.15		97.94		215	1565	17.5	6.93
Straub and Layne (2003)	ODP Leg 126, site 782A	782A-13X-3-51-53	782A-13X-3-51-53	Izu volcanic arc	30.861	141.314	glass shards from tephra		3.26	55.29	2.83	0.37	10.86	0.94	3.79	8.26	0.19	15.26	0.15		97.94	2.2	215	1565	17.5	6.93
Barnes et al. (2010)	ODP Leg 126, site 782A	782A-39X-1-21-23	782A-39X-1-21-23	Izu volcanic arc	30.861	141.314	glass shards from tephra		33.257	55.99	3	0.39	11.08	1.04	3.31	7.95	0.24	14.82	0.12		97.94			1810
Schindlbeck et al. (2018)	IODP 350, site 1436A	350-U1436A-8H-1-5-7	350-U1436A-8H-1-5-7-8	Izu volcanic arc	32.398	140.365	glass shard	50.45	0.714367	55.48	2.98	0.3645	12.24	1.1109	3.35	7.77	0.2684	14.31	0.0687		97.9425
Schindlbeck et al. (2018)	IODP 350, site 1436A	350-U1436A-7H-4-38-40	350-U1436A-7H-4-38-40-11	Izu volcanic arc	32.398	140.365	glass shard	47.99	0.674055	55.05	2.82	0.2999	12.44	1.1493	3.65	8.17	0.1748	14.08	0.1113		97.9453
Bryant et al. (2003)	ODP Leg 126, site 782A	782A-35X-6-130-136	782A-35X-6-130-136-24A	Izu volcanic arc	30.861	141.314	glass shard		24	56.38	2.76	0.47	12.43	1.16	3.6	8.16	0.26	14.77			97.95						38	7.9	169	28.1	56.9	0.596	0.64	76	2.61	7.96	1.49	7.87	2.64	0.96	3.89		4.69		3		2.95		1.88
Bryant et al. (2003)	ODP Leg 126, site 782A	782A-6H-1-138-140	782A-6H-1-138-140-3A	Izu volcanic arc	30.861	141.314	glass shard	49.2	1.8	54.09	2.41	0.4	13.39	0.97	4.47	9.64	0.12	14.5			97.95						49	6.2	152	22.9	41.7	0.495	0.46	72	2.29	6.24	1.19	6.65	2.24	0.72	3.02		3.8		2.43		2.64		1.42
Bryant et al. (2003)	ODP Leg 125, Site 786A	786A-6X-5-7-9	786A-6X-5-7-9-4C	Izu volcanic arc	30.861	141.314	glass shard	53.7	10.8	54.24	2.35	0.32	13.16	1.07	4.68	9.63	0.1	14.46			97.95				35	8.5	53	4.9	162	25.4	46.7	0.185	0.76	83	1.5	5.03	1	5.9	2.4	0.88	3.23		4.01		2.64		2.64		1.45
Straub and Layne (2003)	ODP Leg 126, site 782A	782A-39-X-1-21-23	782A-39-X-1-21-23	Izu volcanic arc	30.861	141.314	glass shards from tephra		29.61	55.99	3	0.4	11.08	1.04	3.31	7.95	0.24	14.82	0.12		97.95	2.2	226	1810	21.2	6.7
Straub and Layne (2003)	ODP Leg 126, site 782A	782A-39X-1-21-23	782A-39X-1-21-23	Izu volcanic arc	30.861	141.314	glass shard		29.6	55.99	3	0.4	11.08	1.04	3.31	7.95	0.24	14.82	0.12		97.95		226	1810	21.2	6.7
Straub (2003)	ODP Leg 126, site 782A	782A-39X-1-21-23	782A-39X-1-21-23-4	Izu volcanic arc	30.861	141.314	glass shards from tephra		29.6	55.99	3	0.4	11.08	1.04	3.31	7.95	0.24	14.82	0.12		97.95		226	1810	21.2	6.7
Schindlbeck et al. (2018)	IODP 350, site 1436A	350-U1436A-1H-2-91-93	350-U1436A-1H-2-91-93-3	Izu volcanic arc	32.398	140.365	glass shard	2.41	0.0438292	53.31	2.39	0.2697	14	1.1304	4.53	9.34	0.2148	12.65	0.1207		97.9556					5.85	59.17	3.36	137.19	19.84	30	0.254	0.362	75.23	1.539	5.01	0.914	5.15	1.85	0.836	2.71	0.519	3.54	0.786	2.24	0.401	2.25	0.377	1.24
Barnes et al. (2010)	ODP Leg 126, site 782A	782A-2H-4-113-114	782A-2H-4-113-114	Izu volcanic arc	30.861	141.314	plagioclase-hosted melt inclusion		0.546	52.72	1.9	0.53	8.91	0.53	6.03	11.19	0.17	15.8	0.19		97.97			910
Barnes et al. (2010)	ODP Leg 126, site 782A	782A-39X-1-21-23	782A-39X-1-21-23	Izu volcanic arc	30.861	141.314	glass shards from tephra		33.257	50.29	1.9	0.37	15.31	1.18	5.7	10.37	0.24	12.5	0.11		97.97			50
Barnes et al. (2010)	ODP Leg 126, site 782A	782A-39X-1-21-23	782A-39X-1-21-23	Izu volcanic arc	30.861	141.314	glass shards from tephra		33.257	51.05	2.29	0.27	13.97	1.15	5.01	9.82	0.23	14.1	0.08		97.97			460
Barnes et al. (2010)	ODP Leg 126, site 782A	782A-13X-3-51-53	782A-13X-3-51-53	Izu volcanic arc	30.861	141.314	glass shards from tephra		3.262	55.29	2.83	0.4	10.86	0.94	3.79	8.26	0.19	15.26	0.15		97.97			1565
Barnes et al. (2010)	ODP Leg 126, site 782A	782A-17X-2-7-8	782A-17X-2-7-8	Izu volcanic arc	30.861	141.314	glass shards from tephra		4.854	56.04	2.74	0.35	11.39	1.08	3.42	7.97	0.22	14.65	0.11		97.97			1573
Schindlbeck et al. (2018)	IODP 350, site 1436A	350-U1436A-5H-5-114-116	350-U1436A-5H-5-114-116-10	Izu volcanic arc	32.398	140.365	glass shard		0.402073	54.04	2.72	0.249	13.08	1.2053	3.79	8.9	0.2665	13.66	0.0637		97.9745
Schindlbeck et al. (2018)	IODP 350, site 1436A	350-U1436A-6H-2-5	350-U1436A-6H-2-5-7-1	Izu volcanic arc	32.398	140.365	glass shard	36.85	0.501378	51.45	1.83	0.1917	13.88	1.1369	5	10.72	0.2663	13.49	0.0141		97.979
Barnes et al. (2010)	ODP Leg 126, site 782A	782A-17X4-0-2	782A-17X-4-0-2	Izu volcanic arc	30.861	141.314	glass shards from tephra		5.031	55.47	2.66	0.38	11.36	0.99	4.38	8.35	0.28	14	0.11		97.98			1090
Straub and Layne (2003); Straub et al. (2004)	ODP Leg 126, site 782A	782A-23X-4-107-109	782A-23X-4-107-109	Izu volcanic arc	30.861	141.314	glass shard		8.59	51.72	2.19	0.34	13.59	1.21	4.99	9.53	0.26	14.05	0.1		97.98	1.6	145	1180	17.9	7		4.65	179.2	22.8	34.7	0.32	0.47	70.9	1.73	4.93	0.94	5.27	2.01	0.81	3.32	0.56	3.83	0.84	2.47	0.39	2.63	0.38	1.27
Straub et al. (2004)	ODP Leg 126, site 782A	782A-23X-4-107-109	782A-23X-4-107-109-59D1	Izu volcanic arc	30.861	141.314	glass shards from tephra		8.595	51.72	2.19	0.34	13.59	1.21	4.99	9.53	0.26	14.05	0.1		97.98				18	7		4.65	179.2	22.8	34.7	0.32	0.47	70.9	1.73	4.93	0.94	5.27	2.01	0.81	3.32	0.56	3.83	0.84	2.47	0.39	2.63	0.38	1.27
Straub (2003)	ODP Leg 126, site 782A	782A-23X-4-107-109	782A-23X-4-107-109-D1	Izu volcanic arc	30.861	141.314	glass shards from tephra		8.59	51.72	2.19	0.34	13.59	1.21	4.99	9.53	0.26	14.05	0.1		97.98	1.6	145	1180	17.9	7
Straub and Layne (2003)	ODP Leg 126, site 782A	782A-23X-4-107-109	782A-23X-4-107-109	Izu volcanic arc	30.861	141.314	glass shards from tephra		8.59	51.72	2.19	0.34	13.59	1.21	4.99	9.53	0.26	14.05	0.1		97.98	2.1	145	1180	17.9	7
Barnes et al. (2010)	ODP Leg 126, site 782A	782A-23X-6-66-68	782A-23X-6-66-68	Izu volcanic arc	30.861	141.314	glass shards from tephra		8.751	55.73	2.73	0.44	11.63	1.17	3.49	8.06	0.2	14.53			97.98
Barnes et al. (2010)	ODP Leg 126, site 782A	782A-11X-3-0-1	782A-11X-3-0-1	Izu volcanic arc	30.861	141.314	glass shards from tephra		2.842	53.51	2.61	0.22	11.98	1.08	4.23	9.01	0.23	14.99	0.12		97.98			1135
Bryant et al. (2003)	ODP Leg 126, site 782A	782A-26X-1-141-144	782A-26X-1-141-144-12A	Izu volcanic arc	30.861	141.314	glass shard	241.7	8.1	56.25	1.73	0.14	15.25	1.37	3.49	8.61	0.21	12.93			97.98
Bryant et al. (2003)	ODP Leg 125, Site 784A	784A-8R-5-35-37	784A-8R-5-35-37-1B	Izu volcanic arc	30.9	141.74	glass shard	65.2	2.75	55.88	2.8	0.44	11.59	0.98	3.86	8.9	0.09	15.47			97.98				39	6.9	41	6.1	193	25.9	60.3	0.632	0.33	77	3.16	8.69	1.55	8.41	2.94	1.03	3.66		4.19		2.69		2.76		1.71
Schindlbeck et al. (2018)	IODP 350, site 1436A	350-U1436A-1H-2-91-93	350-U1436A-1H-2-91-93-12	Izu volcanic arc	32.398	140.365	glass shard	2.41	0.0438292	52.33	2.15	0.2607	14.04	1.1044	4.82	9.88	0.2746	13.07	0.0504		97.9801
Schindlbeck et al. (2018)	IODP 350, site 1436A	350-U1436A-8H-1-5-7	350-U1436A-8H-1-5-7-11	Izu volcanic arc	32.398	140.365	glass shard	50.45	0.714367	54.71	2.9	0.2976	11.26	0.9731	3.99	8.59	0.1101	15.05	0.1079		97.9887
Barnes et al. (2010)	ODP Leg 126, site 782A	782A-23X-4-107-109	782A-23X-4-107-109	Izu volcanic arc	30.861	141.314	glass shards from tephra		8.595	51.72	2.19	0.35	13.59	1.21	4.99	9.53	0.26	14.05	0.1		97.99			1180
Barnes et al. (2010)	ODP Leg 126, site 782A	782A-6H-6-55-57	782A-6H-6-55-57	Izu volcanic arc	30.861	141.314	glass shards from tephra		1.925	55.49	2.79	0.37	11.36	1.04	3.59	8.09	0.24	14.92	0.1		97.99			1828
Barnes et al. (2010)	ODP Leg 126, site 782A	782A-14X-5-14-17	782A-14X-5-14-17	Izu volcanic arc	30.861	141.314	glass shards from tephra		3.52	53.72	2.4	0.31	11.49	0.74	4.97	9.46	0.29	14.5	0.11		97.99			770
Schindlbeck et al. (2018)	IODP 350, site 1436A	350-U1436A-7H-4-125-127	350-U1436A-7H-4-125-127-10	Izu volcanic arc	32.398	140.365	glass shard	48.86	0.688311	54.87	2.81	0.3241	12.36	1.1319	3.65	8.49	0.222	14.05	0.0917		97.9997
Barnes et al. (2010)	ODP Leg 126, site 782A	782A-17X-2-7-8	782A-17X-2-7-8	Izu volcanic arc	30.861	141.314	glass shards from tephra		4.854	55.91	2.77	0.34	11.93	1.1	3.4	8.08	0.23	14.14	0.1		98			1367
Barnes et al. (2010)	ODP Leg 126, site 782A	782A-19X-2-24-26	782A-19X-2-24-26	Izu volcanic arc	30.861	141.314	plagioclase-hosted melt inclusion		6.031	53.32	2.29	0.23	10.88	0.66	5.73	9.84	0.22	14.72	0.11		98			1118
Barnes et al. (2010)	ODP Leg 126, site 782A	782A-19X-2-24-26	782A-19X-2-24-26	Izu volcanic arc	30.861	141.314	plagioclase-hosted melt inclusion		6.031	54.6	1.97	0.21	8.5	0.61	6.12	10.3	0.17	15.42	0.1		98			738
Bryant et al. (2003)	ODP Leg 126, site 782A	782A-20X-CC-9-11	782A-20X-CC-9-11-16A	Izu volcanic arc	30.861	141.314	glass shard	184.1	6.1	55.95	2.44	0.26	13.01	1.05	3.73	9.03	0	14.53			98
Schindlbeck et al. (2018)	IODP 350, site 1436A	350-U1436A-9H-2-95-97	350-U1436A-9H-2-95-97-3	Izu volcanic arc	32.398	140.365	glass shard	56.49	0.813345	53.27	2.87	0.3151	13.17	1.2645	4.39	8.79	0.22	13.6	0.1142		98.0038
Schindlbeck et al. (2018)	IODP 350, site 1436A	350-U1436A-9H-2-95-97	350-U1436A-9H-2-95-97-8	Izu volcanic arc	32.398	140.365	glass shard	56.49	0.813345	52.78	2.45	0.2911	12.04	0.9727	5.45	9.92	0.1573	13.87	0.0734		98.0045					8.03	48.15	3.84	140.35	24.62	45.23	0.397	0.527	85.49	1.98	6.26	1.192	6.45	2.63	0.986	3.54	0.613	4.43	0.945	2.89	0.457	2.9	0.444	1.75
Barnes et al. (2010)	ODP Leg 126, site 782A	782A-19X-2-24-26	782A-19X-2-24-26	Izu volcanic arc	30.861	141.314	glass shards from tephra		6.031	55.41	2.71	0.32	11.43	0.93	4.05	8.55	0.19	14.3	0.12		98.01			1290
Barnes et al. (2010)	ODP Leg 126, site 782A	782A-11X-3-0-1	782A-11X-3-0-1	Izu volcanic arc	30.861	141.314	glass shards from tephra		2.842	53.16	2.76	0.2	12.31	1.1	4.2	8.9	0.22	15.05	0.12		98.02			1108
Barnes et al. (2010)	ODP Leg 126, site 782A	782A-21X-2-50-52	782A-21X-2-50-52	Izu volcanic arc	30.861	141.314	plagioclase-hosted melt inclusion		7.207	53.64	2.52	0.37	12.82	1.17	4.18	8.61	0.23	14.4	0.09		98.03			1160
Barnes et al. (2010)	ODP Leg 126, site 782A	782A-21X-2-50-52	782A-21X-2-50-52	Izu volcanic arc	30.861	141.314	glass shards from tephra		7.207	53.68	2.67	0.33	12.6	1.14	4.31	8.57	0.14	14.5	0.09		98.03			1350
Straub and Layne (2002, 2003); Straub et al. (2004)	ODP Leg 126, site 782A	782A-11X-3-0-1	782A-11X-3-0-1-19-2	Izu volcanic arc	30.861	141.314	glass shard		2.84	53.16	2.76	0.22	12.31	1.1	4.2	8.9	0.22	15.05	0.12		98.04	2.3	233	1108	9.6	3.91		2.22	171.2	21.9	33.3	0.27	0.19	34.5	1.44	4.61	0.85	5.12	2.06	0.83	2.98	0.52	3.99	0.83	2.52	0.37	2.58	0.41	1.14
Straub et al. (2004)	ODP Leg 126, site 782A	782A-11X-3-0-1	782A-11X-3-0-1-19-2	Izu volcanic arc	30.861	141.314	glass shards from tephra		2.842	53.16	2.76	0.22	12.31	1.1	4.2	8.9	0.22	15.05	0.12		98.04				10	3.9		2.22	171.2	21.9	33.3	0.27	0.19	34.5	1.44	4.61	0.85	5.12	2.06	0.83	2.98	0.52	3.99	0.83	2.52	0.37	2.58	0.41	1.14
Straub (2003)	ODP Leg 126, site 782A	782A-11X-3-0-1	782A-11X-3-0-1-2	Izu volcanic arc	30.861	141.314	glass shards from tephra		2.84	53.16	2.76	0.22	12.31	1.1	4.2	8.9	0.22	15.05	0.12		98.04	2.3	233	1108	9.6	3.91
Straub and Layne (2003)	ODP Leg 126, site 782A	782A-11X-3-0-1	782A-11X-3-0-1	Izu volcanic arc	30.861	141.314	glass shards from tephra		2.84	53.16	2.76	0.22	12.31	1.1	4.2	8.9	0.22	15.05	0.12		98.04	1.9	233	1108	9.6	3.91
Barnes et al. (2010)	ODP Leg 126, site 782A	782A-15X-3-9-10	782A-15X-3-9-10	Izu volcanic arc	30.861	141.314	glass shards from tephra		3.78	51.72	2.24	0.36	13.55	1.28	4.59	9.37	0.22	14.61	0.1		98.04			1062
Schindlbeck et al. (2018)	IODP 350, site 1436A	350-U1436A-9H-2-95-97	350-U1436A-9H-2-95-97-12	Izu volcanic arc	32.398	140.365	glass shard	56.49	0.813345	53.33	2.79	0.341	12.96	1.2411	4.38	8.99	0.2107	13.71	0.0902		98.043
Barnes et al. (2010)	ODP Leg 126, site 782A	782A-29X-3-9-11	782A-29X-3-9-11	Izu volcanic arc	30.861	141.314	glass shards from tephra		11.514	52.45	2.18	0.24	12.73	1	5.07	9.91	0.16	14.2	0.11		98.05			490
Schindlbeck et al. (2018)	IODP 350, site 1436A	350-U1436A-8H-3-58-60	350-U1436A-8H-3-58-60-7	Izu volcanic arc	32.398	140.365	glass shard	53.56	0.765331	54.39	2.85	0.314	12.93	1.2533	3.45	8.25	0.2542	14.25	0.1264		98.0679
Straub and Layne (2003)	ODP Leg 126, site 782A	782A-11X-3-0-1	782A-11X-3-0-1-19-8	Izu volcanic arc	30.861	141.314	glass shard		2.84	53.06	2.48	0.19	12.2	1.09	4.42	9.16	0.24	15.11	0.12		98.07	2.5	196	1227	9.7	3.85
Straub (2003)	ODP Leg 126, site 782A	782A-11X-3-0-1	782A-11X-3-0-1-8	Izu volcanic arc	30.861	141.314	glass shards from tephra		2.84	53.06	2.48	0.19	12.2	1.09	4.42	9.16	0.24	15.11	0.12		98.07	2.5	196	1227	9.7	3.85
Straub and Layne (2003)	ODP Leg 126, site 782A	782A-11X-3-0-1	782A-11X-3-0-1	Izu volcanic arc	30.861	141.314	glass shards from tephra		2.84	53.06	2.48	0.19	12.2	1.09	4.42	9.16	0.24	15.11	0.12		98.07	2	196	1227	9.7	3.85
Barnes et al. (2010)	ODP Leg 126, site 782A	782A-18X-1-15-17	782A-18X-1-15-17	Izu volcanic arc	30.861	141.314	glass shards from tephra		5.349	53.2	2.04	0.32	10.45	0.83	6.05	9.9	0.37	14.8	0.11		98.07			210
Schindlbeck et al. (2018)	IODP 350, site 1436A	350-U1436A-9H-2-95-97	350-U1436A-9H-2-95-97-4	Izu volcanic arc	32.398	140.365	glass shard	56.49	0.813345	53.13	2.65	0.2831	13.1	1.2255	4.53	8.93	0.1873	13.98	0.0621		98.078					8.23	46.81	4.19	137.86	24.07	43.35	0.358	0.571	87.96	1.972	6.41	1.09	6.67	2.65	1.004	3.36	0.62	4.39	0.932	2.73	0.339	2.72	0.331	1.53
Barnes et al. (2010)	ODP Leg 126, site 782A	782A-14X-2-142-144	782A-14X-2-142-144	Izu volcanic arc	30.861	141.314	glass shards from tephra		3.454	56.57	2.97	0.49	11.57	0.96	3.27	7.72	0.19	14.3	0.05		98.09			2070
Straub (2003)	ODP Leg 126, site 782A	782A-2H-4-113-114	782A-2H-4-113-114	Izu volcanic arc	30.861	141.314	plagioclase-hosted melt inclusion		0.546	53.1	2.04	0.59	8.71	0.59	5.84	10.49	0.14	16.38	0.21		98.09
Barnes et al. (2010)	ODP Leg 126, site 782A	782A-6H-6-88-90	782A-6H-6-88-90	Izu volcanic arc	30.861	141.314	glass shards from tephra		1.938	55.33	2.85	0.37	11.39	0.99	3.81	8.3	0.2	14.74	0.11		98.09			1793
Barnes et al. (2010)	ODP Leg 126, site 782A	782A-18X-1-15-17	782A-18X-1-15-17	Izu volcanic arc	30.861	141.314	glass shards from tephra		5.349	55.11	2	0.45	12.33	1.07	4.42	8.83	0.23	13.5	0.15		98.09			370
Schindlbeck et al. (2018)	IODP 350, site 1436A	350-U1436A-4H-5-39-41	350-U1436A-4H-5-39-41-4	Izu volcanic arc	32.398	140.365	glass shard	23.19	0.334935	54.82	2.78	0.2455	12.38	1.038	3.5	8.39	0.2526	14.62	0.0729		98.099					7.55	45.28	3.44	163.41	24.56	39.58	0.498	0.508	112.79	1.741	5.27	1.078	5.99	2.51	0.99	3.13	0.581	4.39	1.102	2.81	0.435	3.13	0.527	1.55
Barnes et al. (2010)	ODP Leg 126, site 782A	782A-33X-5-36-39	782A-33X-5-36-39	Izu volcanic arc	30.861	141.314	glass shards from tephra		14.201	51.93	2.47	0.44	12.99	1.12	4.32	9.28	0.25	15.16	0.14		98.1			1567
Barnes et al. (2010)	ODP Leg 126, site 782A	782A-11X-3-0-1	782A-11X-3-0-1	Izu volcanic arc	30.861	141.314	glass shards from tephra		2.842	53.06	2.48	0.23	12.2	1.09	4.42	9.16	0.24	15.11	0.12		98.11			1227
Barnes et al. (2010)	ODP Leg 126, site 782A	782A-15X-3-9-10	782A-15X-3-9-10	Izu volcanic arc	30.861	141.314	glass shards from tephra		3.78	52.01	2.29	0.39	13.22	1.25	4.62	9.34	0.23	14.66	0.1		98.11			1122
Barnes et al. (2010)	ODP Leg 126, site 782A	782A-2H-4-113-114	782A-2H-4-113-114	Izu volcanic arc	30.861	141.314	plagioclase-hosted melt inclusion		0.546	53.1	2.04	0.59	8.71	0.59	5.84	10.49	0.14	16.4	0.21		98.11			1280
Barnes et al. (2010)	ODP Leg 126, site 782A	782A-21X-2-50-52	782A-21X-2-50-52	Izu volcanic arc	30.861	141.314	plagioclase-hosted melt inclusion		7.207	54.1	2.4	0.36	12.92	1.18	4.2	8.28	0.19	14.4	0.08		98.11			1020
Barnes et al. (2010)	ODP Leg 126, site 782A	782A-14X-5-14-17	782A-14X-5-14-17	Izu volcanic arc	30.861	141.314	glass shards from tephra		3.52	54.01	2.5	0.3	11.74	0.87	4.55	9.33	0.28	14.4	0.14		98.12			420
Bryant et al. (2003)	ODP Leg 125, Site 786A	786A-5X-1-74-76	786A-5X-1-74-76-2C	Izu volcanic arc	31.88	141.23	glass shard	38.9	5.6	54.9	2.91	0.21	13.21	1.12	3.61	9.2	0.1	14.73			98.12				41	7.1	52	2.4	136	23.7	45.1	0.331	0.29	121	1.56	4.9	0.94	5.67	2.21	0.88	2.95		3.95		2.49		2.58		1.41
Schindlbeck et al. (2018)	IODP 350, site 1436A	350-U1436A-9H-4-120-122	350-U1436A-9H-4-120-122-2	Izu volcanic arc	32.398	140.365	glass shard	56.64	0.815803	53	2.5	0.3246	12.24	1.0265	4.7	9.54	0.2818	14.45	0.0605		98.1234
Barnes et al. (2010)	ODP Leg 126, site 782A	782A-21X-3-26-27	782A-21X-3-26-27	Izu volcanic arc	30.861	141.314	glass shards from tephra		7.267	51.17	2.38	0.32	14.32	1.35	5.32	9.98	0.27	12.9	0.12		98.13			760
Bryant et al. (2003)	ODP Leg 126, site 782A	782A-35X-3-53-59	782A-35X-3-53-59-23A	Izu volcanic arc	30.861	141.314	glass shard		16.5	56.58	2.45	0.7	10.97	0.96	4.5	9.1	0.24	14.49			98.13
Barnes et al. (2010)	ODP Leg 126, site 782A	782A-33X-5-36-39	782A-33X-5-36-39	Izu volcanic arc	30.861	141.314	glass shards from tephra		14.201	51.89	2.42	0.45	12.87	1.08	4.42	9.36	0.22	15.28	0.14		98.13			1510
Schindlbeck et al. (2018)	IODP 350, site 1436A	350-U1436A-12F-2-10-12	350-U1436A-12F-2-10-12-6	Izu volcanic arc	32.398	140.365	glass shard	64.4	0.942966	52.17	2.29	0.2379	12.54	1.1542	5.4	10.07	0.2081	14	0.0619		98.1321					6.14	44.39	3.2	183.5	21.15	38.04	0.264	0.48	70.7	1.664	5	0.872	5.42	1.73	0.739	2.54	0.446	3.67	0.787	2.41	0.316	2.74	0.401	1.18
Kutterholf et al. (2018)	IODP 352, site U1441A	352-U1441A-5R-1-128-130	352-U1441A-5R-1_128-130 average	Izu volcanic arc	28.43	142.73	glass shard	35.5	7.33	56.472	2.28274	0.355732	12.2399	1.0647	3.86383	8.85681	0.223962	14.5771	0.0630957		98.1327					8.16	49.28	5.27667	194.17	20.4433	27.4967	0.237667	0.652	87.8133	1.208	3.87	0.754333	4.63667	1.89	0.772667	2.97667	0.490667	3.27667	0.811667	2.33	0.328333	2.52667	0.382333	0.98
Straub and Layne (2003)	ODP Leg 126, site 782A	782A-33X-5-36-39	782A-33X-5-36-39	Izu volcanic arc	30.861	141.314	glass shard		14.2	51.89	2.42	0.46	12.87	1.08	4.42	9.36	0.22	15.28	0.14		98.14	1.9	181	1510	14	6.2
Straub (2003)	ODP Leg 126, site 782A	782A-33X-5-36-39	782A-33X-5-36-39-D3	Izu volcanic arc	30.861	141.314	glass shards from tephra		14.2	51.89	2.42	0.46	12.87	1.08	4.42	9.36	0.22	15.28	0.14		98.14	1.9	181	1510	14	6.2
Straub and Layne (2003)	ODP Leg 126, site 782A	782A-33X-5-36-39	782A-33X-5-36-39	Izu volcanic arc	30.861	141.314	glass shards from tephra		14.2	51.89	2.42	0.46	12.87	1.08	4.42	9.36	0.22	15.28	0.14		98.14	2	181	1510	14	6.2
Barnes et al. (2010)	ODP Leg 126, site 782A	782A-21X-2-50-52	782A-21X-2-50-52	Izu volcanic arc	30.861	141.314	glass shards from tephra		7.207	53.48	2.58	0.35	13.16	1.09	4.22	8.58	0.28	14.3	0.11		98.15			1020
Barnes et al. (2010)	ODP Leg 126, site 782A	782A-29X-3-9-11	782A-29X-3-9-11	Izu volcanic arc	30.861	141.314	glass shards from tephra		11.514	52.7	2.36	0.29	13.15	1.16	4.6	9.63	0.28	13.9	0.08		98.15			810
Barnes et al. (2010)	ODP Leg 126, site 782A	782A-6H-6-88-90	782A-6H-6-88-90	Izu volcanic arc	30.861	141.314	glass shards from tephra		1.938	55.98	2.83	0.35	11.3	0.98	3.49	8.09	0.22	14.92			98.16
Schindlbeck et al. (2018)	IODP 350, site 1436A	350-U1436A-3H-2-25-27	350-U1436A-3H-2-25-27-4	Izu volcanic arc	32.398	140.365	glass shard	12.95	0.207005	55.32	2.67	0.3869	14.5	1.68	3.03	7.83	0.3047	12.31	0.1292		98.1608
Schindlbeck et al. (2018)	IODP 350, site 1436A	350-U1436A-8H-1-5-7	350-U1436A-8H-1-5-7-9	Izu volcanic arc	32.398	140.365	glass shard	50.45	0.714367	53.77	2.72	0.2832	12.72	1.1687	4.02	8.65	0.2584	14.44	0.1323		98.1626
Barnes et al. (2010)	ODP Leg 126, site 782A	782A-29X-3-9-11	782A-29X-3-9-11	Izu volcanic arc	30.861	141.314	glass shards from tephra		11.514	52.82	2.34	0.33	12.86	1.23	4.73	9.82	0.18	13.8	0.06		98.17			300
Barnes et al. (2010)	ODP Leg 126, site 782A	782A-29X-3-9-11	782A-29X-3-9-11	Izu volcanic arc	30.861	141.314	glass shards from tephra		11.514	52.29	2.2	0.25	12.97	1.1	5.09	10	0.22	13.9	0.15		98.17			910
Schindlbeck et al. (2018)	IODP 350, site 1436A	350-U1436A-8H-3-58-60	350-U1436A-8H-3-58-60-5	Izu volcanic arc	32.398	140.365	glass shard	53.56	0.765331	52.75	2.65	0.3117	14.12	1.2205	4.16	8.96	0.2538	13.65	0.0961		98.1721
Barnes et al. (2010)	ODP Leg 126, site 782A	782A-14X-5-14-17	782A-14X-5-14-17	Izu volcanic arc	30.861	141.314	glass shards from tephra		3.52	54.01	2.57	0.32	11.75	0.81	4.74	9.33	0.27	14.3	0.08		98.18			1500
Barnes et al. (2010)	ODP Leg 126, site 782A	782A-19X-2-24-26	782A-19X-2-24-26	Izu volcanic arc	30.861	141.314	glass shards from tephra		6.031	54.27	2.48	0.36	11	0.82	4.83	9.56	0.27	14.5	0.09		98.18			1240
Straub and Layne (2003)	ODP Leg 126, site 782A	782A-19X-1-147-149	782A-19X-1-147-149	Izu volcanic arc	30.861	141.314	plagioclase-hosted melt inclusion		6.03	54.9	2.02	0.17	8.38	0.51	6.1	10.4	0.21	15.4	0.09		98.18	2.36	81	708	7	4.4
Straub (2003)	ODP Leg 126, site 782A	782A-19X-1-147-149	782A-19X-1-147-149-11B	Izu volcanic arc	30.861	141.314	plagioclase-hosted melt inclusion		6.03	54.9	2.02	0.17	8.38	0.51	6.1	10.4	0.21	15.4	0.09		98.18	2.36	81	708	7	4.4
Straub and Layne (2003)	ODP Leg 126, site 782A	782A-19X-1-147-149	782A-19X-1-147-149	Izu volcanic arc	30.861	141.314	plagioclase-hosted melt inclusion		6.03	54.9	2.02	0.17	8.38	0.51	6.1	10.4	0.21	15.4	0.09		98.18	1.82	81	708	7	4.4
Barnes et al. (2010)	ODP Leg 126, site 782A	782A-11X-3-0-1	782A-11X-3-0-1	Izu volcanic arc	30.861	141.314	glass shards from tephra		2.842	53.82	2.58	0.23	12.14	1.09	4.17	8.79	0.2	15.05	0.12		98.19			1145
Barnes et al. (2010)	ODP Leg 126, site 782A	782A-19X-2-24-26	782A-19X-2-24-26	Izu volcanic arc	30.861	141.314	plagioclase-hosted melt inclusion		6.031	54.6	2.06	0.22	8.53	0.49	6.14	10.44	0.18	15.44	0.09		98.19			738
Schindlbeck et al. (2018)	IODP 350, site 1436A	350-U1436A-8H-1-5-7	350-U1436A-8H-1-5-7-2	Izu volcanic arc	32.398	140.365	glass shard	50.45	0.714367	52.77	2.53	0.2365	13.09	1.1562	4.89	9.39	0.1668	13.9	0.0637		98.1932
Bryant et al. (2003)	ODP Leg 126, site 782A	782A-14X2-141-143	782A-14X2-141-143-8A	Izu volcanic arc	30.861	141.314	glass shard	127.5	3.9	55.32	2.66	0.34	12.13	0.83	4.18	9.09	0.13	15.32			98.2
Straub et al. (2004)	ODP Leg 126, site 782A	782A‐11X‐3‐0‐1	782A‐11X‐3‐0‐1	Izu volcanic arc	30.861	141.314	glass shard		2.84	53.93	2.66	0.22	12.02	1.07	4.13	8.84	0.26	15.07	0.11		98.2					4		2.17	170.3	22.7	34.5	0.25	0.19	34.5	1.51	4.62	0.84	5.21	2.09	0.85	3.07	0.53	3.81	0.87	2.54	0.38	2.63	0.41	1.17
Barnes et al. (2010)	ODP Leg 126, site 782A	782A-19X-2-24-26	782A-19X-2-24-26	Izu volcanic arc	30.861	141.314	plagioclase-hosted melt inclusion		6.031	54.9	2.02	0.2	8.38	0.51	6.1	10.4	0.21	15.4	0.09		98.21			708
Schindlbeck et al. (2018)	IODP 350, site 1436A	350-U1436A-9H-3-9	350-U1436A-9H-3-9-11-9	Izu volcanic arc	32.398	140.365	glass shard	56.64	0.815803	51.98	2.35	0.3091	12.56	1.0623	5.48	10.13	0.1903	14.13	0.0204		98.2121
Bryant et al. (2003)	ODP Leg 125, Site 784A	784A-24R-3-118-120	784A-24R-3-118-120-13B	Izu volcanic arc	30.861	141.314	glass shard	217.4	11	55.29	2.7	0.32	13.6	1.4	3.71	8.83	0.11	14.04			98.22
Bryant et al. (2003)	ODP Leg 125, Site 786A	786A-5X-1-74-76	786A-5X-1-74-76-2C	Izu volcanic arc	31.88	141.23	glass shard	38.9	5.6	54.96	2.49	0.25	14.3	1.3	4.36	8.66	0.25	13.44			98.22
Kutterholf et al. (2018)	IODP 352, site U1441A	352-U1441A-3R-5-1-3	352-U1441A-3R-5_1-3 average	Izu volcanic arc	28.43	142.73	glass shard	20.73	3.38647	55.4115	2.53677	0.363077	12.408	0.937357	4.52486	9.43612	0.226117	14.0968	0.0593992		98.2226					8.73667	56.8833	6.51667	169.963	21.56	37.32	0.377667	0.626333	75.8733	1.79067	5.43667	0.965667	5.48333	1.92	0.774	2.92	0.469667	3.87	0.839333	2.61333	0.366	2.58333	0.383	1.28
Barnes et al. (2010)	ODP Leg 126, site 782A	782A-2H-6-85-87	782A-2H6-85-87	Izu volcanic arc	30.861	141.314	glass shards from tephra		0.685	55.52	2.37	0.44	11.69	1.04	3.19	9.36	0.11	14.3	0.21		98.23			510
Straub (2003)	ODP Leg 126, site 782A	782A-18X-1-15-17	782A-18X-1-15-17	Izu volcanic arc	30.861	141.314	glass shards from tephra		5.349	51.88	2.25	0.48	12.22	0.97	6.28	10	0.29	13.77	0.09		98.23
Barnes et al. (2010)	ODP Leg 126, site 782A	782A-14X-5-14-17	782A-14X-5-14-17	Izu volcanic arc	30.861	141.314	glass shards from tephra		3.52	53.67	2.32	0.29	11.54	0.81	5	9.73	0.25	14.5	0.13		98.24			750
Schindlbeck et al. (2018)	IODP 350, site 1436A	350-U1436A-9H-4-120-122	350-U1436A-9H-4-120-122-8	Izu volcanic arc	32.398	140.365	glass shard	56.64	0.815803	53.62	2.48	0.2894	11.67	0.928	4.86	9.41	0.2567	14.7	0.0289		98.243
Barnes et al. (2010)	ODP Leg 126, site 782A	782A-21X-2-50-52	782A-21X-2-50-52	Izu volcanic arc	30.861	141.314	glass shards from tephra		7.207	53.38	2.37	0.32	13.03	1.19	4.35	9.01	0.28	14.2	0.12		98.25			790
Barnes et al. (2010)	ODP Leg 126, site 782A	782A-39X-1-21-23	782A-39X-1-21-23	Izu volcanic arc	30.861	141.314	glass shards from tephra		33.257	54.39	2.61	0.52	12.32	1.02	3.84	8.38	0.25	14.78	0.14		98.25			2107
Barnes et al. (2010)	ODP Leg 126, site 782A	782A-18X-1-15-17	782A-18X-1-15-17	Izu volcanic arc	30.861	141.314	glass shards from tephra		5.349	51.88	2.25	0.48	12.22	0.97	6.28	10	0.29	13.8	0.09		98.26			210
Schindlbeck et al. (2018)	IODP 350, site 1436A	350-U1436A-9H-2-78-80	350-U1436A-9H-2-78-80-14	Izu volcanic arc	32.398	140.365	glass shard	56.32	0.810559	53.56	2.65	0.2951	12.83	1.2048	4.59	9.15	0.2446	13.69	0.0576		98.2721
Barnes et al. (2010)	ODP Leg 126, site 782A	782A-14X-5-14-17	782A-14X-5-14-17	Izu volcanic arc	30.861	141.314	glass shards from tephra		3.52	53.89	2.42	0.32	11.34	0.76	5.08	9.63	0.17	14.6	0.07		98.28			700
Barnes et al. (2010)	ODP Leg 126, site 782A	782A-17X-2-7-8	782A-17X-2-7-8	Izu volcanic arc	30.861	141.314	glass shards from tephra		4.854	56.21	2.77	0.37	11.51	1.1	3.41	8.04	0.22	14.55	0.1		98.28			1555
Barnes et al. (2010)	ODP Leg 126, site 782A	782A-29X-3-42-46	782A-29X-3-42-46	Izu volcanic arc	30.861	141.314	glass shards from tephra		11.931	56.52	3.64	0.33	8.56	0.91	2.55	8.73	0.23	16.7	0.11		98.28			1130
Barnes et al. (2010)	ODP Leg 126, site 782A	782A-13X-3-51-53	782A-13X-3-51-53	Izu volcanic arc	30.861	141.314	glass shards from tephra		3.262	55.08	2.82	0.38	10.91	0.98	3.9	8.43	0.18	15.46	0.14		98.28			1525
Schindlbeck et al. (2018)	IODP 350, site 1436A	350-U1436A-8H-1-5-7	350-U1436A-8H-1-5-7-15	Izu volcanic arc	32.398	140.365	glass shard	50.45	0.714367	53.55	2.7	0.2769	13.18	1.2417	4.48	8.86	0.2681	13.69	0.0499		98.2966
Schindlbeck et al. (2018)	IODP 350, site 1436A	350-U1436A-8H-1-5-7	350-U1436A-8H-1-5-7-1	Izu volcanic arc	32.398	140.365	glass shard	50.45	0.714367	54.54	2.79	0.3041	12.59	1.1642	3.6	8.34	0.1953	14.65	0.1233		98.2969
Barnes et al. (2010)	ODP Leg 126, site 782A	782A-11X-3-0-1	782A-11X-3-0-1	Izu volcanic arc	30.861	141.314	glass shards from tephra		2.842	53.93	2.66	0.21	12.02	1.07	4.13	8.84	0.26	15.07	0.11		98.3			1222
Schindlbeck et al. (2018)	IODP 350, site 1436A	350-U1436A-9H-4-75-77	350-U1436A-9H-4-75-77-11	Izu volcanic arc	32.398	140.365	glass shard	56.64	0.815803	53.54	2.42	0.3332	13.42	1.1027	4.95	9.22	0.2734	12.95	0.0954		98.3047
Barnes et al. (2010)	ODP Leg 126, site 782A	782A-17X-2-7-8	782A-17X-2-7-8	Izu volcanic arc	30.861	141.314	glass shards from tephra		4.854	56.29	2.75	0.33	11.39	1.1	3.41	7.98	0.22	14.74	0.1		98.31			1475
Straub and Layne (2003); Straub et al. (2004)	ODP Leg 126, site 782A	782A-11X-3-0-1	782A-11X-3-0-1-19-9	Izu volcanic arc	30.861	141.314	glass shard		2.84	53.93	2.66	0.22	12.02	1.07	4.13	8.84	0.26	15.07	0.11		98.31	2.5	191	1222	10.2	4.04		2.17	170.3	22.7	34.5	0.25	0.19	34.5	1.51	4.62	0.84	5.21	2.09	0.85	3.07	0.53	3.81	0.87	2.54	0.38	2.63	0.41	1.17
Straub et al. (2004)	ODP Leg 126, site 782A	782A-11X-3-0-1	782A-11X-3-0-1-19-9	Izu volcanic arc	30.861	141.314	glass shards from tephra		2.842	53.93	2.66	0.22	12.02	1.07	4.13	8.84	0.26	15.07	0.11		98.31				10	4		2.17	170.3	22.7	34.5	0.25	0.19	34.5	1.51	4.62	0.84	5.21	2.09	0.85	3.07	0.53	3.81	0.87	2.54	0.38	2.63	0.41	1.17
Straub (2003)	ODP Leg 126, site 782A	782A-11X-3-0-1	782A-11X-3-0-1-9	Izu volcanic arc	30.861	141.314	glass shards from tephra		2.84	53.93	2.66	0.22	12.02	1.07	4.13	8.84	0.26	15.07	0.11		98.31	2.5	191	1222	10.2	4.04
Straub and Layne (2003)	ODP Leg 126, site 782A	782A-11X-3-0-1	782A-11X-3-0-1	Izu volcanic arc	30.861	141.314	glass shards from tephra		2.84	53.93	2.66	0.22	12.02	1.07	4.13	8.84	0.26	15.07	0.11		98.31	1.8	191	1222	10.2	4.04
Straub et al. (2004)	ODP Leg 126, site 782A	782A‐23X‐4‐107‐109	782A‐23X‐4‐107‐109	Izu volcanic arc	30.861	141.314	glass shard		8.59	52.06	2.2	0.33	13.79	1.23	4.91	9.53	0.23	13.98	0.11		98.31					7		4.75	177.2	22.9	34.5	0.3	0.49	71.9	1.78	4.94	0.91	5.52	2.17	0.79	3.16	0.54	3.98	0.88	2.64	0.39	2.63	0.4	1.23
Bryant et al. (2003)	ODP Leg 125, Site 784A	784A-24R-3-118-120	784A-24R-3-118-120-13B	Izu volcanic arc	30.861	141.314	glass shard	217.4	11	54.62	2.6	0.24	13.44	1.3	4.05	9.3	0	14.46			98.31
Schindlbeck et al. (2018)	IODP 350, site 1436A	350-U1436A-8H-3-58-60	350-U1436A-8H-3-58-60-2	Izu volcanic arc	32.398	140.365	glass shard	53.56	0.765331	54.31	2.75	0.3019	12.44	1.1634	3.81	8.48	0.1857	14.8	0.0717		98.3127
Schindlbeck et al. (2018)	IODP 350, site 1436A	350-U1436A-9H-4-120-122	350-U1436A-9H-4-120-122-6	Izu volcanic arc	32.398	140.365	glass shard	56.64	0.815803	52.82	2.65	0.271	11.31	0.9738	4.93	9.63	0.2099	15.47	0.055		98.3197
Barnes et al. (2010)	ODP Leg 126, site 782A	782A-11X-3-0-1	782A-11X-3-0-1	Izu volcanic arc	30.861	141.314	glass shards from tephra		2.842	55.95	3	0.25	11.18	1.07	3.58	8.03	0.27	14.88	0.12		98.33			1413
Barnes et al. (2010)	ODP Leg 126, site 782A	782A-15X-3-9-10	782A-15X-3-9-10	Izu volcanic arc	30.861	141.314	glass shards from tephra		3.78	52.27	2.2	0.36	13.42	1.25	4.61	9.24	0.19	14.69	0.1		98.33			1050
Barnes et al. (2010)	ODP Leg 126, site 782A	782A-39X-1-21-23	782A-39X-1-21-23	Izu volcanic arc	30.861	141.314	glass shards from tephra		33.257	55.52	2.8	0.45	11.83	1.04	3.57	8.14	0.17	14.68	0.14		98.34			1653
Schindlbeck et al. (2018)	IODP 350, site 1436A	350-U1436A-3H-2-25-27	350-U1436A-3H-2-25-27-8	Izu volcanic arc	32.398	140.365	glass shard	12.95	0.207005	54.35	3.12	0.2685	12.43	1.1054	3.49	8.65	0.1699	14.62	0.1521		98.3559
Straub and Layne (2003)	ODP Leg 126, site 782A	782A-15X-3-9-10	782A-15X-3-9-10	Izu volcanic arc	30.861	141.314	glass shard		3.78	52.27	2.2	0.39	13.42	1.25	4.61	9.24	0.19	14.69	0.1		98.36	1.8	158	1050	23.7	6.99
Straub (2003)	ODP Leg 126, site 782A	782A-15X-3-9-10	782A-15X-3-9-10-F1	Izu volcanic arc	30.861	141.314	glass shards from tephra		3.78	52.27	2.2	0.39	13.42	1.25	4.61	9.24	0.19	14.69	0.1		98.36	1.8	158	1050	23.7	6.99
Straub and Layne (2003)	ODP Leg 126, site 782A	782A-15X-3-9-10	782A-15X-3-9-10	Izu volcanic arc	30.861	141.314	glass shards from tephra		3.78	52.27	2.2	0.39	13.42	1.25	4.61	9.24	0.19	14.69	0.1		98.36	1.8	158	1050	23.7	6.99
Barnes et al. (2010)	ODP Leg 126, site 782A	782A-14X-2-142-144	782A-14X-2-142-144	Izu volcanic arc	30.861	141.314	glass shards from tephra		3.454	56.42	3.07	0.43	11.91	0.99	3.28	7.51	0.25	14.4	0.1		98.36			1650
Schindlbeck et al. (2018)	IODP 350, site 1436A	350-U1436A-9H-3-38-40	350-U1436A-9H-3-38-40-9	Izu volcanic arc	32.398	140.365	glass shard	56.93	0.820555	53.63	2.53	0.3156	11.95	1.0151	4.64	9.46	0.2332	14.51	0.0806		98.3645
Schindlbeck et al. (2018)	IODP 350, site 1436A	350-U1436A-9H-2-95-97	350-U1436A-9H-2-95-97-14	Izu volcanic arc	32.398	140.365	glass shard	56.49	0.813345	53.92	3.29	0.405	13.04	1.6616	3.91	8.18	0.1572	13.6	0.2022		98.366
Barnes et al. (2010)	ODP Leg 126, site 782A	782A-13X-3-51-53	782A-13X-3-51-53	Izu volcanic arc	30.861	141.314	glass shards from tephra		3.262	55.2	2.81	0.36	11.11	0.96	3.84	8.35	0.21	15.39	0.14		98.37			1563
Barnes et al. (2010)	ODP Leg 126, site 782A	782A-19X-2-24-26	782A-19X-2-24-26	Izu volcanic arc	30.861	141.314	plagioclase-hosted melt inclusion		6.031	54.33	1.88	0.23	10.26	0.83	5.04	10.43	0.22	15.03	0.12		98.37			558
Straub and Layne (2003); Straub et al. (2004)	ODP Leg 126, site 782A	782A-23X-4-107-109	782A-23X-4-107-109	Izu volcanic arc	30.861	141.314	glass shard		8.59	52.06	2.2	0.33	13.79	1.23	4.91	9.53	0.23	13.98	0.11		98.37	1.7	153	1143	18.1	7		4.75	177.2	22.9	34.5	0.3	0.49	71.9	1.78	4.94	0.91	5.52	2.17	0.79	3.16	0.54	3.98	0.88	2.64	0.39	2.63	0.4	1.23
Straub et al. (2004)	ODP Leg 126, site 782A	782A-23X-4-107-109	782A-23X-4-107-109-59G1	Izu volcanic arc	30.861	141.314	glass shards from tephra		8.595	52.06	2.2	0.33	13.79	1.23	4.91	9.53	0.23	13.98	0.11		98.37				18	7		4.75	177.2	22.9	34.5	0.3	0.49	71.9	1.78	4.94	0.91	5.52	2.17	0.79	3.16	0.54	3.98	0.88	2.64	0.39	2.63	0.4	1.23
Straub (2003)	ODP Leg 126, site 782A	782A-23X-4-107-109	782A-23X-4-107-109-G1	Izu volcanic arc	30.861	141.314	glass shards from tephra		8.59	52.06	2.2	0.33	13.79	1.23	4.91	9.53	0.23	13.98	0.11		98.37	1.7	153	1143	18.1	7
Straub and Layne (2003)	ODP Leg 126, site 782A	782A-23X-4-107-109	782A-23X-4-107-109	Izu volcanic arc	30.861	141.314	glass shards from tephra		8.59	52.06	2.2	0.33	13.79	1.23	4.91	9.53	0.23	13.98	0.11		98.37	1.7	153	1143	18.1	7
Straub and Layne (2003)	ODP Leg 126, site 782A	782A-13X-3-51-53	782A-13X-3-51-53	Izu volcanic arc	30.861	141.314	glass shard		3.26	55.2	2.81	0.37	11.11	0.96	3.84	8.35	0.21	15.39	0.14		98.38		200	1563	17	6.61
Straub (2003)	ODP Leg 126, site 782A	782A-13X-3-51-53	782A-13X-3-51-53-B1	Izu volcanic arc	30.861	141.314	glass shards from tephra		3.26	55.2	2.81	0.37	11.11	0.96	3.84	8.35	0.21	15.39	0.14		98.38		200	1563	17	6.61
Straub and Layne (2003)	ODP Leg 126, site 782A	782A-13X-3-51-53	782A-13X-3-51-53	Izu volcanic arc	30.861	141.314	glass shards from tephra		3.26	55.2	2.81	0.37	11.11	0.96	3.84	8.35	0.21	15.39	0.14		98.38	1.8	200	1563	17	6.61
Barnes et al. (2010)	ODP Leg 126, site 782A	782A-15X-3-9-10	782A-15X-3-9-10	Izu volcanic arc	30.861	141.314	glass shards from tephra		3.78	52.01	2.27	0.34	13.41	1.25	4.6	9.34	0.26	14.79	0.11		98.38			1120
Schindlbeck et al. (2018)	IODP 350, site 1436A	350-U1436A-8H-1-5-7	350-U1436A-8H-1-5-7-13	Izu volcanic arc	32.398	140.365	glass shard	50.45	0.714367	56.49	3.26	0.3221	10.09	0.8928	3.8	8.42	0.135	14.93	0.0409		98.3808
Schindlbeck et al. (2018)	IODP 350, site 1436A	350-U1436A-4H-5-39-41	350-U1436A-4H-5-39-41-14	Izu volcanic arc	32.398	140.365	glass shard	23.19	0.334935	55.91	2.94	0.2375	11.89	1.0348	3.28	8.22	0.1135	14.7	0.0557		98.3815
Barnes et al. (2010)	ODP Leg 126, site 782A	782A-15X-3-9-10	782A-15X-3-9-10	Izu volcanic arc	30.861	141.314	glass shards from tephra		3.78	51.82	2.27	0.37	13.7	1.28	4.65	9.3	0.25	14.66	0.1		98.4			1092
Barnes et al. (2010)	ODP Leg 126, site 782A	782A-23X-4-107-109	782A-23X-4-107-109	Izu volcanic arc	30.861	141.314	glass shards from tephra		8.595	52.06	2.2	0.36	13.79	1.23	4.91	9.53	0.23	13.98	0.11		98.4			1143
Barnes et al. (2010)	ODP Leg 126, site 782A	782A-32X-6-31-33	782A-32X-6-31-33	Izu volcanic arc	30.861	141.314	glass shards from tephra		13.715	54.95	2.74	0.65	10.56	0.92	4.22	8.64	0.19	15.37	0.16		98.4			1655
Barnes et al. (2010)	ODP Leg 126, site 782A	782A-39X-1-21-23	782A-39X-1-21-23	Izu volcanic arc	30.861	141.314	glass shards from tephra		33.257	55.37	2.82	0.44	11.69	1.01	3.69	8.12	0.2	14.92	0.14		98.4			1883
Straub et al. (2004)	ODP Leg 126, site 782A	782A‐26X‐5‐147‐149	782A‐26X‐5‐147‐149	Izu volcanic arc	30.861	141.314	glass shard		10.45	55.07	2.72	0.24	10.67	1.26	3.97	8.47	0.28	15.7	0.21		98.4					5.1		3.55	219	23.7	40.1	0.43	0.29	56	1.86	5.69	0.98	6.57	2.54	0.95	3.45	0.62	3.96	0.94	2.92	0.4	3.03	0.47	1.37
Barnes et al. (2010)	ODP Leg 126, site 782A	782A-29X-3-9-11	782A-29X-3-9-11	Izu volcanic arc	30.861	141.314	glass shards from tephra		11.514	52.6	2.36	0.3	13.13	1.13	4.87	9.79	0.17	13.9	0.15		98.4			770
Barnes et al. (2010)	ODP Leg 126, site 782A	782A-6H-6-55-57	782A-6H-6-55-57	Izu volcanic arc	30.861	141.314	glass shards from tephra		1.925	55.17	2.81	0.41	12.07	1.09	3.72	8.28	0.2	14.54	0.11		98.4			1560
Schindlbeck et al. (2018)	IODP 350, site 1436A	350-U1436A-3H-3-28-30	350-U1436A-3H-3-28-30-1	Izu volcanic arc	32.398	140.365	glass shard	12.95	0.207005	51.58	2.53	0.283	16.07	1.4688	4.32	8.81	0.2809	12.96	0.1003		98.403
Schindlbeck et al. (2018)	IODP 350, site 1436A	350-U1436A-5H-5-132-134	350-U1436A-5H-5-132-134-12	Izu volcanic arc	32.398	140.365	glass shard	33.08	0.455442	51.78	1.99	0.2656	13.67	1.0367	5.47	10.99	0.2263	12.92	0.0569		98.4055					11.14	63.51	4.54	215.76	36.19	58.62	0.379	0.76	146.03	2.41	7.6	1.412	9.15	3.53	1.46	4.51	0.964	6.09	1.392	4.03	0.632	4.24	0.587	2.06
Bryant et al. (2003)	ODP Leg 126, site 782A	782A-14X2-141-143	782A-14X2-113-115-7A	Izu volcanic arc	30.861	141.314	glass shard	127.2	3.9	56.5	2.84	0.32	11.57	0.93	3.74	8.77	0.05	15.27			98.41
Straub and Layne (2003)	ODP Leg 126, site 782A	782A-39-X-1-21-23	782A-39-X-1-21-23	Izu volcanic arc	30.861	141.314	glass shards from tephra		29.61	55.37	2.82	0.45	11.69	1.01	3.69	8.12	0.2	14.92	0.14		98.41	1.8	231	1883	23.3	7
Straub and Layne (2003)	ODP Leg 126, site 782A	782A-39X-1-21-23	782A-39X-1-21-23	Izu volcanic arc	30.861	141.314	glass shard		29.6	55.37	2.82	0.45	11.69	1.01	3.69	8.12	0.2	14.92	0.14		98.41		231	1883	23.3	7
Straub (2003)	ODP Leg 126, site 782A	782A-39X-1-21-23	782A-39X-1-21-23-1	Izu volcanic arc	30.861	141.314	glass shards from tephra		29.6	55.37	2.82	0.45	11.69	1.01	3.69	8.12	0.2	14.92	0.14		98.41		231	1883	23.3	7
Schindlbeck et al. (2018)	IODP 350, site 1436A	350-U1436A-5H-5-62-64	350-U1436A-5H-5-62-64-17	Izu volcanic arc	32.398	140.365	glass shard	33.08	0.455442	54.16	2.77	0.3157	14.31	1.4092	3.77	8.82	0.296	12.48	0.0807		98.4116
Barnes et al. (2010)	ODP Leg 126, site 782A	782A-13X-3-51-53	782A-13X-3-51-53	Izu volcanic arc	30.861	141.314	glass shards from tephra		3.262	55.3	2.82	0.39	11.03	0.96	3.82	8.38	0.25	15.32	0.15		98.42			1585
Barnes et al. (2010)	ODP Leg 126, site 782A	782A-21X-2-84-86	782A-21X-2-84-86	Izu volcanic arc	30.861	141.314	glass shards from tephra		7.227	51.11	1.95	0.23	11.37	0.81	6.15	11.1	0.25	15.34	0.11		98.42			783
Barnes et al. (2010)	ODP Leg 126, site 782A	782A-32X-6-31-33	782A-32X-6-31-33	Izu volcanic arc	30.861	141.314	glass shards from tephra		13.715	55.08	2.78	0.37	10.9	0.97	4	8.56	0.23	15.38	0.15		98.42			1453
Barnes et al. (2010)	ODP Leg 126, site 782A	782A-14X-2-142-144	782A-14X-2-142-144	Izu volcanic arc	30.861	141.314	glass shards from tephra		3.454	56.7	2.98	0.46	11.47	0.99	3.33	7.81	0.21	14.4	0.08		98.43			1180
Barnes et al. (2010)	ODP Leg 126, site 782A	782A-6H-6-88-90	782A-6H-6-88-90	Izu volcanic arc	30.861	141.314	glass shards from tephra		1.938	56.66	2.84	0.37	11.14	0.96	3.42	7.98	0.22	14.84			98.43
Schindlbeck et al. (2018)	IODP 350, site 1436A	350-U1436A-8H-1-5-7	350-U1436A-8H-1-5-7-3	Izu volcanic arc	32.398	140.365	glass shard	50.45	0.714367	53.97	2.81	0.2756	12.52	1.1588	5.1	8.81	0.1547	13.55	0.086		98.4351
Schindlbeck et al. (2018)	IODP 350, site 1436A	350-U1436A-9H-3-9	350-U1436A-9H-3-9-11-5	Izu volcanic arc	32.398	140.365	glass shard	56.64	0.815803	53.01	2.62	0.2741	12.98	1.1875	4.88	9.33	0.1899	13.89	0.0754		98.4369
Bryant et al. (2003)	ODP Leg 125, Site 784A	784A-24R-3-118-120	784A-24R-3-118-120-13B	Izu volcanic arc	30.861	141.314	glass shard	217.4	11	54.27	2.67	0.26	13.56	1.43	3.94	9.23	0.18	14.46			98.44
Kutterholf et al. (2018)	IODP 352, site U1439A	352-U1439A-9H-1-7-9	352-U1439A-9H-1_7-9 average	Izu volcanic arc	28.4	142.6	glass shard	73.41	10.9049	54.4358	2.34089	0.305419	13.3091	1.2009	4.39444	9.30719	0.26499	14.3572	0.0839578		98.447
Schindlbeck et al. (2018)	IODP 350, site 1436A	350-U1436A-9H-4-120-122	350-U1436A-9H-4-120-122-12	Izu volcanic arc	32.398	140.365	glass shard	56.64	0.815803	52.98	2.44	0.3445	12.95	1.0035	4.99	9.4	0.2637	13.98	0.098		98.4497
Barnes et al. (2010)	ODP Leg 126, site 782A	782A-14X-5-14-17	782A-14X-5-14-17	Izu volcanic arc	30.861	141.314	glass shards from tephra		3.52	54.77	2.51	0.35	11.56	0.77	4.47	9.13	0.29	14.5	0.11		98.46			1240
Schindlbeck et al. (2018)	IODP 350, site 1436A	350-U1436A-1H-2-91-93	350-U1436A-1H-2-91-93-1	Izu volcanic arc	32.398	140.365	glass shard	2.41	0.0438292	55.88	2.69	0.3992	11.5	0.9981	3.16	8.47	0.2375	15.07	0.0558		98.4606
Schindlbeck et al. (2018)	IODP 350, site 1436A	350-U1436A-5H-5-114-116	350-U1436A-5H-5-114-116-8	Izu volcanic arc	32.398	140.365	glass shard		0.402073	52.22	1.7	0.241	15.26	0.9169	8.68	8.51	0.2963	10.59	0.0592		98.4734
Barnes et al. (2010)	ODP Leg 126, site 782A	782A-23X-4-107-109	782A-23X-4-107-109	Izu volcanic arc	30.861	141.314	glass shards from tephra		8.595	52.14	2.26	0.32	13.51	1.23	4.96	9.49	0.23	14.24	0.1		98.48			1192
Barnes et al. (2010)	ODP Leg 126, site 782A	782A-6H-6-55-57	782A-6H-6-55-57	Izu volcanic arc	30.861	141.314	glass shards from tephra		1.925	54.32	2.7	0.41	12.66	1.15	3.88	8.49	0.22	14.54	0.11		98.48			1457
Schindlbeck et al. (2018)	IODP 350, site 1436A	350-U1436A-5H-5-62-64	350-U1436A-5H-5-62-64-18	Izu volcanic arc	32.398	140.365	glass shard	33.08	0.455442	51.31	1.57	0.1546	9.57	0.4956	8.01	13.55	0.1612	13.62	0.0428		98.4842
Barnes et al. (2010)	ODP Leg 126, site 782A	782A-6H-6-55-57	782A-6H-6-55-57	Izu volcanic arc	30.861	141.314	glass shards from tephra		1.925	54.08	2.71	0.43	12.8	1.18	3.95	8.48	0.23	14.51	0.12		98.49			1398
Schindlbeck et al. (2018)	IODP 350, site 1436A	350-U1436A-5H-5-132-134	350-U1436A-5H-5-132-134-18	Izu volcanic arc	32.398	140.365	glass shard	33.08	0.455442	51.69	1.92	0.2996	13.81	1.152	5.77	10.72	0.2769	12.8	0.0601		98.4986
Barnes et al. (2010)	ODP Leg 126, site 782A	782A-17X-2-7-8	782A-17X-2-7-8	Izu volcanic arc	30.861	141.314	glass shards from tephra		4.854	56	2.75	0.33	11.63	1.08	3.56	8.14	0.2	14.81			98.5
Barnes et al. (2010)	ODP Leg 126, site 782A	782A-39X-1-21-23	782A-39X-1-21-23	Izu volcanic arc	30.861	141.314	glass shards from tephra		33.257	52.16	2.26	0.34	13.56	1.26	4.53	9.3	0.23	14.72	0.14		98.5			1173
Barnes et al. (2010)	ODP Leg 126, site 782A	782A-19X-2-24-26	782A-19X-2-24-26	Izu volcanic arc	30.861	141.314	glass shards from tephra		6.031	55.56	2.69	0.39	12.36	0.94	3.75	8.5	0.29	13.9	0.12		98.5			1100
Schindlbeck et al. (2018)	IODP 350, site 1436A	350-U1436A-6H-3-77-79	350-U1436A-6H-3-77-79-10	Izu volcanic arc	32.398	140.365	glass shard	39.07	0.528428	53.94	2.12	0.2587	13.08	1.0937	4.11	9.5	0.1908	14.14	0.0696		98.5028
Kutterholf et al. (2018)	IODP 352, site U1439A	352-U1439A-4H-CC-21-23	352-U1439A-4H-CC_21-23 average	Izu volcanic arc	28.4	142.6	glass shard	35.27	3.47728	54.4559	2.34237	0.306847	11.7713	0.92696	4.68451	9.91606	0.220441	15.3244	0.0510685		98.5081
Schindlbeck et al. (2018)	IODP 350, site 1436A	350-U1436A-8H-2-90-92	350-U1436A-8H-2-90-92-7	Izu volcanic arc	32.398	140.365	glass shard	52.48	0.747632	54.86	2.79	0.2854	12.36	1.1032	3.76	8.49	0.1723	14.65	0.0428		98.5137
Schindlbeck et al. (2018)	IODP 350, site 1436A	350-U1436A-8H-2-90-92	350-U1436A-8H-2-90-92-3	Izu volcanic arc	32.398	140.365	glass shard	52.48	0.747632	55.01	2.72	0.3215	12.19	1.0753	3.71	8.45	0.2135	14.76	0.0655		98.5158
Barnes et al. (2010)	ODP Leg 126, site 782A	782A-37X-4-43-45	782A-37X-4-43-45	Izu volcanic arc	30.861	141.314	glass shards from tephra		29.223	52.15	2.1	0.37	12.69	0.93	5.52	10.31	0.25	14.1	0.1		98.52			320
Schindlbeck et al. (2018)	IODP 350, site 1436A	350-U1436A-9H-4-75-77	350-U1436A-9H-4-75-77-4	Izu volcanic arc	32.398	140.365	glass shard	56.64	0.815803	52.27	2.61	0.3741	14.17	1.33	4.59	9.16	0.274	13.67	0.0746		98.5227
Bryant et al. (2003)	ODP Leg 126, site 782A	782A-14X2-141-143	782A-14X2-141-143-8A	Izu volcanic arc	30.861	141.314	glass shard	127.5	3.9	55.34	2.61	0.36	12.1	0.86	4.22	9.02	0.1	15.39			98.53
Schindlbeck et al. (2018)	IODP 350, site 1436A	350-U1436A-3H-2-47-49	350-U1436A-3H-2-47-49-2	Izu rear- arc?	32.398	140.365	glass shard	12.95	0.207005	50.82	2.33	0.2082	12.49	0.9838	6.22	10.6	0.1995	14.58	0.1011		98.5326					27.32	11.5	98.05	107.69	41.74	213.36	6.53	3.91	494.73	19.11	48.36	5.59	24.08	5.66	1.15	6	0.97	7.3	1.37	4.9	0.7	4.71	0.69	6.59
Barnes et al. (2010)	ODP Leg 126, site 782A	782A-23X-6-66-68	782A-23X-6-66-68	Izu volcanic arc	30.861	141.314	glass shards from tephra		8.751	55.76	2.75	0.4	11.92	1.22	3.46	8.11	0.23	14.59	0.1		98.54			1622
Schindlbeck et al. (2018)	IODP 350, site 1436A	350-U1436A-5H-6-6-8	350-U1436A-5H-6-6-8-15	Izu volcanic arc	32.398	140.365	glass shard	33.32	0.458366	51.72	2.69	0.4019	15.61	1.6268	4.56	9.27	0.2374	12.29	0.1423		98.5484
Barnes et al. (2010)	ODP Leg 126, site 782A	782A-14X-5-14-17	782A-14X-5-14-17	Izu volcanic arc	30.861	141.314	glass shards from tephra		3.52	54.16	2.43	0.29	11.04	0.79	4.95	9.8	0.22	14.8	0.07		98.55			820
Bryant et al. (2003)	ODP Leg 125, Site 784A	784A-24R-3-118-120	784A-24R-3-118-120-13B	Izu volcanic arc	30.861	141.314	glass shard	217.4	11	55.36	2.68	0.35	13.46	1.41	3.67	8.84	0.09	14.14			98.55
Barnes et al. (2010)	ODP Leg 126, site 782A	782A-2H-4-113-114	782A-2H-4-113-114	Izu volcanic arc	30.861	141.314	plagioclase-hosted melt inclusion		0.546	52.2	2	0.5	9.33	0.6	6.35	11.26	0.17	16.01	0.14		98.56			882
Bryant et al. (2003)	ODP Leg 125, Site 786A	786A-5X-1-74-76	786A-5X-1-74-76-2C	Izu volcanic arc	31.88	141.23	glass shard	38.9	5.6	54.2	2.44	0.17	13.62	1.13	4.69	9.25	0.18	14.32			98.56
Schindlbeck et al. (2018)	IODP 350, site 1436A	350-U1436A-9H-4-75-77	350-U1436A-9H-4-75-77-2	Izu volcanic arc	32.398	140.365	glass shard	56.64	0.815803	52.24	2.25	0.3127	12.98	1.0534	4.89	9.84	0.1709	14.77	0.0546		98.5616
Schindlbeck et al. (2018)	IODP 350, site 1436A	350-U1436A-9H-2-95-97	350-U1436A-9H-2-95-97-15	Izu volcanic arc	32.398	140.365	glass shard	56.49	0.813345	53.75	2.68	0.3402	13.61	1.2363	4.57	9.07	0.1101	13.12	0.0751		98.5617
Bryant et al. (2003)	ODP Leg 126, site 782A	782A-20X-CC-9-11	782A-20X-CC-9-11-16A	Izu volcanic arc	30.861	141.314	glass shard	184.1	6.1	55.28	2.55	0.32	12.78	0.95	4.18	8.99	0.07	14.89			98.58
Barnes et al. (2010)	ODP Leg 126, site 782A	782A-2H-4-113-114	782A-2H-4-113-114	Izu volcanic arc	30.861	141.314	plagioclase-hosted melt inclusion		0.546	52.98	2.06	0.56	9.11	0.59	5.87	10.85	0.15	16.29	0.12		98.58			1232
Barnes et al. (2010)	ODP Leg 126, site 782A	782A-6H-6-55-57	782A-6H-6-55-57	Izu volcanic arc	30.861	141.314	glass shards from tephra		1.925	52.72	2.27	0.32	12.56	1.02	4.98	9.67	0.23	14.81			98.58
Schindlbeck et al. (2018)	IODP 350, site 1436A	350-U1436A-8H-2-90-92	350-U1436A-8H-2-90-92-15	Izu volcanic arc	32.398	140.365	glass shard	52.48	0.747632	54.87	2.7	0.3183	12.88	1.2068	3.63	8.33	0.2653	14.29	0.0937		98.5841
Straub et al. (2004)	ODP Leg 126, site 782A	782A-26X-5-147-149	782A-26X-5-147-149	Izu volcanic arc	30.861	141.314	glass shard		10.45	55.07	2.72	0.24	10.67	1.26	3.97	8.47	0.28	15.7	0.21		98.59				12	5.1		3.55	219	23.7	40.1	0.43	0.29	56	1.86	5.69	0.98	6.57	2.54	0.95	3.45	0.62	3.96	0.94	2.92	0.4	3.03	0.47	1.37
Straub and Layne (2003)	ODP Leg 126, site 782A	782A-26X-5-147-149	782A-26X-5-147-149	Izu volcanic arc	30.861	141.314	glass shard		10.45	55.07	2.72	0.24	10.67	1.26	3.97	8.47	0.28	15.7	0.21		98.59		243	857	11.5	5.1
Straub et al. (2004)	ODP Leg 126, site 782A	782A-26X-5-147-149	782A-26X-5-147-149-71B1	Izu volcanic arc	30.861	141.314	glass shards from tephra		10.45	55.07	2.72	0.24	10.67	1.26	3.97	8.47	0.28	15.7	0.21		98.59				12	5.1		3.55	219	23.7	40.1	0.43	0.29	56	1.86	5.69	0.98	6.57	2.54	0.95	3.45	0.62	3.96	0.94	2.92	0.4	3.03	0.47	1.37
Straub (2003)	ODP Leg 126, site 782A	782A-26X-5-147-149	782A-26X-5-147-149-B1	Izu volcanic arc	30.861	141.314	glass shards from tephra		10.45	55.07	2.72	0.24	10.67	1.26	3.97	8.47	0.28	15.7	0.21		98.59		243	857	11.5	5.1
Straub and Layne (2003)	ODP Leg 126, site 782A	782A-26X-5-147-149	782A-26X-5-147-149	Izu volcanic arc	30.861	141.314	glass shards from tephra		10.45	55.07	2.72	0.24	10.67	1.26	3.97	8.47	0.28	15.7	0.21		98.59	1.6	243	857	11.5	5.1
Barnes et al. (2010)	ODP Leg 126, site 782A	782A-29X-3-9-11	782A-29X-3-9-11	Izu volcanic arc	30.861	141.314	glass shards from tephra		11.514	52.49	2.23	0.28	12.71	1	5.12	10.36	0.22	14.1	0.08		98.59			470
Barnes et al. (2010)	ODP Leg 126, site 782A	782A-6H-6-55-57	782A-6H-6-55-57	Izu volcanic arc	30.861	141.314	glass shards from tephra		1.925	54.66	2.78	0.38	12.59	1.12	3.91	8.31	0.25	14.47	0.12		98.59			1455
Schindlbeck et al. (2018)	IODP 350, site 1436A	350-U1436A-8H-2-90-92	350-U1436A-8H-2-90-92-12	Izu volcanic arc	32.398	140.365	glass shard	52.48	0.747632	54.65	2.7	0.2982	12.58	1.2184	3.74	8.39	0.2037	14.73	0.0818		98.5921
Bryant et al. (2003)	ODP Leg 126, site 782A	782A-14X2-141-143	782A-14X2-141-143-8A	Izu volcanic arc	30.861	141.314	glass shard	127.5	3.9	55.48	2.7	0.38	11.97	0.91	4.09	9.02	0.09	15.36			98.6
Barnes et al. (2010)	ODP Leg 126, site 782A	782A-6H-6-88-90	782A-6H-6-88-90	Izu volcanic arc	30.861	141.314	glass shards from tephra		1.938	56.4	2.86	0.38	11.27	1.01	3.5	8.17	0.19	14.82			98.6
Straub et al. (2004)	ODP Leg 126, site 782A	782A‐15X‐3‐9‐10	782A‐15X‐3‐9‐10	Izu volcanic arc	30.861	141.314	glass shard		3.78	51.76	2.21	0.34	13.91	1.26	4.71	9.46	0.25	14.71	0.11		98.6					7.3		4.85	175.1	22.7	32.5	0.27	0.49	55.4	1.68	5.17	0.93	5.46	2.11	0.85	3.21	0.55	4.07	0.9	2.62	0.38	2.68	0.42	1.15
Barnes et al. (2010)	ODP Leg 126, site 782A	782A-2H-4-113-114	782A-2H-4-113-114	Izu volcanic arc	30.861	141.314	plagioclase-hosted melt inclusion		0.546	52.35	2.11	0.51	9.19	0.58	6.23	11.43	0.21	15.84	0.15		98.6			1192
Barnes et al. (2010)	ODP Leg 126, site 782A	782A-21X-3-26-27	782A-21X-3-26-27	Izu volcanic arc	30.861	141.314	glass shards from tephra		7.267	50.98	2.42	0.37	14.74	1.46	5.24	10.1	0.26	12.9	0.14		98.61			120
Barnes et al. (2010)	ODP Leg 126, site 782A	782A-32X-6-31-33	782A-32X-6-31-33	Izu volcanic arc	30.861	141.314	glass shards from tephra		13.715	52.26	2.11	0.27	13.21	1.09	5.05	9.76	0.26	14.5	0.1		98.61			753
Barnes et al. (2010)	ODP Leg 126, site 782A	782A-6H-6-55-57	782A-6H-6-55-57	Izu volcanic arc	30.861	141.314	glass shards from tephra		1.925	56.51	2.82	0.39	10.94	1.03	3.53	8.06	0.24	15.09			98.61
Kutterholf et al. (2018)	IODP 352, site U1440A	352-U1440A-8H-5-96-98	352-U1440A-8H-5_96-98 average	Izu volcanic arc	28.45	142.65	glass shard	65.48	8.2029	55.5647	2.5845	0.291235	12.7022	1.06837	3.41158	8.98321	0.238644	15.1086	0.0468691		98.6148
Schindlbeck et al. (2018)	IODP 350, site 1436A	350-U1436A-9H-2-78-80	350-U1436A-9H-2-78-80-2	Izu volcanic arc	32.398	140.365	glass shard	56.32	0.810559	53.67	2.74	0.3623	14.51	1.426	4.13	8.54	0.2931	12.81	0.1363		98.6177					8.66	49.74	4.28	143.97	25.32	46.27	0.459	0.546	87.05	2.048	6.64	1.25	6.68	2.52	1.001	3.53	0.643	4.36	0.959	2.95	0.448	2.86	0.383	1.26
Barnes et al. (2010)	ODP Leg 126, site 782A	782A-26X-5-147-149	782A-26X-5-147-149	Izu volcanic arc	30.861	141.314	glass shards from tephra		10.45	55.07	2.72	0.27	10.67	1.26	3.97	8.47	0.28	15.7	0.21		98.62			857
Kutterholf et al. (2018)	IODP 352, site U1441A	352-U1441A-8R-3-47-49	352-U1441A-8R-3_47-49 average	Izu volcanic arc	28.43	142.73	glass shard	66.99	11.5967	56.8693	3.0952	0.468056	11.8786	1.09983	3.34094	8.23354	0.194854	14.707	0.112583		98.6215					17.5567	45.92	22.8333	292.13	38.2467	84.5433	0.956667	1.445	235.19	5.58	16.1433	2.58667	14.12	4.66667	1.55333	5.41333	0.985333	6.96	1.459	4.05	0.623	4.42667	0.687333	2.81667
Schindlbeck et al. (2018)	IODP 350, site 1436A	350-U1436A-8H-1-5-7	350-U1436A-8H-1-5-7-14	Izu volcanic arc	32.398	140.365	glass shard	50.45	0.714367	54.63	2.84	0.3051	12.36	1.1637	3.71	8.49	0.2512	14.73	0.1486		98.6286
Barnes et al. (2010)	ODP Leg 126, site 782A	782A-32X-6-31-33	782A-32X-6-31-33	Izu volcanic arc	30.861	141.314	glass shards from tephra		13.715	56.03	2.85	0.73	11.22	0.95	3.41	8.1	0.22	14.96	0.16		98.63			1923
Straub (2003)	ODP Leg 126, site 782A	782A-2H-4-11114	782A-2H-4-11114-38A	Izu volcanic arc	30.861	141.314	clinopyroxene-hosted melt inclusion		0.5	52.35	2.11	0.55	9.19	0.58	6.23	11.43	0.21	15.84	0.15		98.64	1.6	214	1192	18	5.5
Straub and Layne (2003)	ODP Leg 126, site 782A	782A-2H-4-113-114	782A-2H-4-113-114	Izu volcanic arc	30.861	141.314	clinopyroxene-hosted melt inclusion		0.5	52.35	2.11	0.55	9.19	0.58	6.23	11.43	0.21	15.84	0.15		98.64	1.6	214	1192	18	5.5
Straub and Layne (2003)	ODP Leg 126, site 782A	782A-2H-4-113-114	782A-2H-4-113-114	Izu volcanic arc	30.861	141.314	clinopyroxene-hosted melt inclusion			52.35	2.11	0.55	9.19	0.58	6.23	11.43	0.21	15.84	0.15		98.64	1.6	214	1192	18	5.5
Straub (2003)	ODP Leg 126, site 782A	782A-2H-4-11114	782A-2H-4-11114-38B	Izu volcanic arc	30.861	141.314	clinopyroxene-hosted melt inclusion		0.5	52.98	2.06	0.62	9.11	0.59	5.87	10.85	0.15	16.29	0.12		98.64	1.4	189	1232	18	5
Straub and Layne (2003)	ODP Leg 126, site 782A	782A-2H-4-113-114	782A-2H-4-113-114	Izu volcanic arc	30.861	141.314	clinopyroxene-hosted melt inclusion		0.5	52.98	2.06	0.62	9.11	0.59	5.87	10.85	0.15	16.29	0.12		98.64	1.4	189	1232	18	5
Straub and Layne (2003)	ODP Leg 126, site 782A	782A-2H-4-113-114	782A-2H-4-113-114	Izu volcanic arc	30.861	141.314	clinopyroxene-hosted melt inclusion			52.98	2.06	0.62	9.11	0.59	5.87	10.85	0.15	16.29	0.12		98.64	1.5	189	1232	18	5
Schindlbeck et al. (2018)	IODP 350, site 1436A	350-U1436A-5H-6-6-8	350-U1436A-5H-6-6-8-11	Izu volcanic arc	32.398	140.365	glass shard	33.32	0.458366	51.3	2.71	0.3734	14.97	1.4047	4.64	9.32	0.2853	13.52	0.1214		98.6448
Bryant et al. (2003)	ODP Leg 125, Site 786A	786A-5X-1-74-76	786A-5X-1-74-76-2C	Izu volcanic arc	31.88	141.23	glass shard	38.9	5.6	55.92	2.96	0.34	13.92	1.5	3.3	8.28	0.19	13.61			98.65
Barnes et al. (2010)	ODP Leg 126, site 782A	782A-29X-3-9-11	782A-29X-3-9-11	Izu volcanic arc	30.861	141.314	glass shards from tephra		11.514	52.28	2.19	0.27	13.96	1.16	4.92	9.96	0.24	13.6	0.08		98.66			390
Barnes et al. (2010)	ODP Leg 126, site 782A	782A-6H-6-55-57	782A-6H-6-55-57	Izu volcanic arc	30.861	141.314	glass shards from tephra		1.925	54.6	2.59	0.33	12.21	1.05	4.04	8.8	0.25	14.79			98.66
Schindlbeck et al. (2018)	IODP 350, site 1436A	350-U1436A-5H-5-132-134	350-U1436A-5H-5-132-134-14	Izu volcanic arc	32.398	140.365	glass shard	33.08	0.455442	51.75	2	0.2666	14.14	1.0661	5.59	10.53	0.2507	12.99	0.0785		98.6619
Barnes et al. (2010)	ODP Leg 126, site 782A	782A-15X-3-9-10	782A-15X-3-9-10	Izu volcanic arc	30.861	141.314	glass shards from tephra		3.78	52.2	2.3	0.35	13.2	1.22	4.67	9.55	0.21	14.88	0.1		98.68			1135
Barnes et al. (2010)	ODP Leg 126, site 782A	782A-11X-3-0-1	782A-11X-3-0-1	Izu volcanic arc	30.861	141.314	glass shards from tephra		2.842	55.27	2.83	0.22	11.6	1.11	3.76	8.46	0.2	15.11	0.12		98.68			1248
Barnes et al. (2010)	ODP Leg 126, site 782A	782A-6H-6-55-57	782A-6H-6-55-57	Izu volcanic arc	30.861	141.314	glass shards from tephra		1.925	54.61	2.79	0.4	12.76	1.09	3.87	8.34	0.23	14.48	0.11		98.68			1500
Barnes et al. (2010)	ODP Leg 126, site 782A	782A-23X-4-107-109	782A-23X-4-107-109	Izu volcanic arc	30.861	141.314	glass shards from tephra		8.595	52.23	2.2	0.37	13.67	1.18	4.95	9.64	0.27	14.07	0.11		98.69			1147
Schindlbeck et al. (2018)	IODP 350, site 1436A	350-U1436A-9H-2-78-80	350-U1436A-9H-2-78-80-1	Izu volcanic arc	32.398	140.365	glass shard	56.32	0.810559	53.93	2.81	0.2491	11.15	1.0596	3.9	9.66	0.1747	15.68	0.0779		98.6913					18.76	54.58	4.68	146.58	25.85	46	0.362	0.449	95.44	1.93	6.17	1.161	6.3	2.88	1.01	3.26	0.553	3.97	0.883	2.81	0.43	3.3	0.613	1.57
Barnes et al. (2010)	ODP Leg 126, site 782A	782A-6H-6-55-57	782A-6H-6-55-57	Izu volcanic arc	30.861	141.314	glass shards from tephra		1.925	55.71	2.81	0.37	11.61	0.99	3.72	8.34	0.25	14.8	0.1		98.7			1870
Barnes et al. (2010)	ODP Leg 126, site 782A	782A-15X-3-9-10	782A-15X-3-9-10	Izu volcanic arc	30.861	141.314	glass shards from tephra		3.78	51.76	2.21	0.32	13.91	1.26	4.71	9.46	0.25	14.71	0.11		98.7			1093
Barnes et al. (2010)	ODP Leg 126, site 782A	782A-23X-4-107-109	782A-23X-4-107-109	Izu volcanic arc	30.861	141.314	glass shards from tephra		8.595	52.48	2.22	0.34	13.43	1.24	5.01	9.49	0.26	14.23			98.7
Barnes et al. (2010)	ODP Leg 126, site 782A	782A-29X-3-9-11	782A-29X-3-9-11	Izu volcanic arc	30.861	141.314	glass shards from tephra		11.514	52.74	2.27	0.27	13.38	1.1	4.77	9.89	0.29	13.9	0.09		98.7			880
Schindlbeck et al. (2018)	IODP 350, site 1436A	350-U1436A-6H-3-77-79	350-U1436A-6H-3-77-79-12	Izu volcanic arc	32.398	140.365	glass shard	39.07	0.528428	54.4	1.92	0.2714	13.07	1.0685	3.95	9.38	0.1974	14.41	0.0335		98.7008
Schindlbeck et al. (2018)	IODP 350, site 1436A	350-U1436A-8H-3-58-60	350-U1436A-8H-3-58-60-15	Izu volcanic arc	32.398	140.365	glass shard	53.56	0.765331	52.42	2.59	0.2377	12.91	1.0609	4.9	9.67	0.1847	14.62	0.112		98.7053
Barnes et al. (2010)	ODP Leg 126, site 782A	782A-39X-1-21-23	782A-41X-4-71-73	Izu volcanic arc	30.861	141.314	glass shards from tephra		39.981	56.13	2.55	0.3	11.04	1.17	3.57	9.01	0.27	14.5	0.17		98.71			910
Barnes et al. (2010)	ODP Leg 126, site 782A	782A-6H-6-88-90	782A-6H-6-88-90	Izu volcanic arc	30.861	141.314	glass shards from tephra		1.938	56.35	2.81	0.35	11.36	1.01	3.55	8.09	0.23	14.85	0.11		98.71			1937
Schindlbeck et al. (2018)	IODP 350, site 1436A	350-U1436A-1H-2-91-93	350-U1436A-1H-2-91-93-5	Izu volcanic arc	32.398	140.365	glass shard	2.41	0.0438292	53.32	1.97	0.1883	12.18	0.848	5.46	10.39	0.258	14.05	0.0495		98.7138					6.83	61.51	3.36	135.35	25.13	37.17	0.258	0.429	88.02	1.488	5.02	0.993	5.7	2.39	0.944	2.98	0.763	4.39	0.973	2.78	0.428	2.81	0.411	1.52
Schindlbeck et al. (2018)	IODP 350, site 1436A	350-U1436A-8H-2-90-92	350-U1436A-8H-2-90-92-14	Izu volcanic arc	32.398	140.365	glass shard	52.48	0.747632	55.62	2.91	0.3315	12.6	1.2234	3.45	8.11	0.1144	14.28	0.0748		98.7141
Schindlbeck et al. (2018)	IODP 350, site 1436A	350-U1436A-5H-6-6-8	350-U1436A-5H-6-6-8-4	Izu volcanic arc	32.398	140.365	glass shard	33.32	0.458366	51.76	2.61	0.3573	14.76	1.5027	4.89	9.25	0.3067	13.15	0.1301		98.7168
Straub and Layne (2003)	ODP Leg 126, site 782A	782A-11X-3-0-1	782A-11X-3-0-1-19-11	Izu volcanic arc	30.861	141.314	glass shard		2.84	55.27	2.83	0.26	11.6	1.11	3.76	8.46	0.2	15.11	0.12		98.72	2.4	236	1248	11.3	4.35
Straub (2003)	ODP Leg 126, site 782A	782A-11X-3-0-1	782A-11X-3-0-1-11	Izu volcanic arc	30.861	141.314	glass shards from tephra		2.84	55.27	2.83	0.26	11.6	1.11	3.76	8.46	0.2	15.11	0.12		98.72	2.4	236	1248	11.3	4.35
Straub and Layne (2003)	ODP Leg 126, site 782A	782A-11X-3-0-1	782A-11X-3-0-1	Izu volcanic arc	30.861	141.314	glass shards from tephra		2.84	55.27	2.83	0.26	11.6	1.11	3.76	8.46	0.2	15.11	0.12		98.72	1.4	236	1248	11.3	4.35
Straub and Layne (2002); Straub et al. (2004)	ODP Leg 126, site 782A	782A-15X-3-9-10	782A-15X-3-9-10	Izu volcanic arc	30.861	141.314	glass shard		3.78006	51.76	2.21	0.34	13.91	1.26	4.71	9.46	0.25	14.71	0.11		98.72				24	7.3		4.85	175.1	22.7	32.5	0.27	0.49	55.4	1.68	5.17	0.93	5.46	2.11	0.85	3.21	0.55	4.07	0.9	2.62	0.38	2.68	0.42	1.15
Straub and Layne (2003)	ODP Leg 126, site 782A	782A-15X-3-9-10	782A-15X-3-9-10	Izu volcanic arc	30.861	141.314	glass shard		3.78	51.76	2.21	0.34	13.91	1.26	4.71	9.46	0.25	14.71	0.11		98.72	2.1	149	1093	23.9	7.29
Straub et al. (2004)	ODP Leg 126, site 782A	782A-15X-3-9-10	782A-15X-3-9-10-29-D2	Izu volcanic arc	30.861	141.314	glass shards from tephra		3.845	51.76	2.21	0.34	13.91	1.26	4.71	9.46	0.25	14.71	0.11		98.72				24	7.3		4.85	175.1	22.7	32.5	0.27	0.49	55.4	1.68	5.17	0.93	5.46	2.11	0.85	3.21	0.55	4.07	0.9	2.62	0.38	2.68	0.42	1.15
Straub (2003)	ODP Leg 126, site 782A	782A-15X-3-9-10	782A-15X-3-9-10-D2	Izu volcanic arc	30.861	141.314	glass shards from tephra		3.78	51.76	2.21	0.34	13.91	1.26	4.71	9.46	0.25	14.71	0.11		98.72	2.1	149	1093	23.9	7.29
Straub and Layne (2003)	ODP Leg 126, site 782A	782A-15X-3-9-10	782A-15X-3-9-10	Izu volcanic arc	30.861	141.314	glass shards from tephra		3.78	51.76	2.21	0.34	13.91	1.26	4.71	9.46	0.25	14.71	0.11		98.72	1.4	149	1093	23.9	7.29
Schindlbeck et al. (2018)	IODP 350, site 1436A	350-U1436A-8H-3-58-60	350-U1436A-8H-3-58-60-4	Izu volcanic arc	32.398	140.365	glass shard	53.56	0.765331	54.37	3.13	0.3228	12.81	1.1214	3.67	8.41	0.1949	14.62	0.0753		98.7244
Schindlbeck et al. (2018)	IODP 350, site 1436A	350-U1436A-4H-5-39-41	350-U1436A-4H-5-39-41-7	Izu volcanic arc	32.398	140.365	glass shard	23.19	0.334935	56.28	2.98	0.2558	11.54	1.0921	3.25	8.21	0.2634	14.77	0.0905		98.7318
Schindlbeck et al. (2018)	IODP 350, site 1436A	350-U1436A-4H-4-39-41	350-U1436A-4H-4-39-41-1	Izu volcanic arc	32.398	140.365	glass shard	12.95	0.207005	55.12	4.64	0.2675	11.53	1.1565	3.57	8.41	0.2109	13.71	0.117		98.7319
Straub and Layne (2003)	ODP Leg 126, site 782A	782A-6H-6-88-90	782A-6H-6-88-90	Izu volcanic arc	30.861	141.314	glass shard		1.94	56.35	2.81	0.39	11.36	1.01	3.55	8.09	0.23	14.85	0.11		98.75		186	1937	19.9	6.85
Straub (2003)	ODP Leg 126, site 782A	782A-6H-6-88-90	782A-6H-6-88-90-G1	Izu volcanic arc	30.861	141.314	glass shards from tephra		1.94	56.35	2.81	0.39	11.36	1.01	3.55	8.09	0.23	14.85	0.11		98.75		186	1937	19.9	6.85
Straub and Layne (2003)	ODP Leg 126, site 782A	782A-6H-6-88-90	782A-6H-6-88-90	Izu volcanic arc	30.861	141.314	glass shards from tephra		1.94	56.35	2.81	0.39	11.36	1.01	3.55	8.09	0.23	14.85	0.11		98.75	1.4	186	1937	19.9	6.85
Straub et al. (2004)	ODP Leg 126, site 782A	782A‐15X‐3‐9‐10	782A‐15X‐3‐9‐10	Izu volcanic arc	30.861	141.314	glass shard		3.78	52.49	2.3	0.4	13.23	1.26	4.6	9.38	0.22	14.89	0.1		98.75					7		5.01	175.5	22.6	32.8	0.27	0.51	56.4	1.66	5.16	0.91	5.56	2.14	0.86	2.98	0.55	4.1	0.91	2.63	0.39	2.64	0.42	1.2
Bryant et al. (2003)	ODP Leg 126, site 782A	782A-35X-6-130-136	782A-35X-6-130-136-24A	Izu volcanic arc	30.861	141.314	glass shard		24	52.66	2.14	0.31	13.53	1.19	5.12	10.24	0.29	14.5			98.76
Barnes et al. (2010)	ODP Leg 126, site 782A	782A-15X-3-9-10	782A-15X-3-9-10	Izu volcanic arc	30.861	141.314	glass shards from tephra		3.78	52.45	2.29	0.34	13.23	1.28	4.61	9.33	0.26	14.88	0.1		98.77			1118
Bryant et al. (2003)	ODP Leg 126, site 782A	782A-20X-CC-9-11	782A-20X-CC-9-11-16A	Izu volcanic arc	30.861	141.314	glass shard	184.1	6.1	55.65	2.56	0.33	13.4	0.98	3.87	8.87	0.09	14.25			98.77
Schindlbeck et al. (2018)	IODP 350, site 1436A	350-U1436A-9H-4-75-77	350-U1436A-9H-4-75-77-7	Izu volcanic arc	32.398	140.365	glass shard	56.64	0.815803	53.53	2.81	0.3927	14.08	1.3537	3.98	8.7	0.2534	13.58	0.0969		98.7767
Barnes et al. (2010)	ODP Leg 126, site 782A	782A-29X-3-9-11	782A-29X-3-9-11	Izu volcanic arc	30.861	141.314	glass shards from tephra		11.514	52.7	2.27	0.3	14.14	1.22	4.7	10.02	0.2	13.1	0.13		98.78			510
Schindlbeck et al. (2018)	IODP 350, site 1436A	350-U1436A-9H-2-95-97	350-U1436A-9H-2-95-97-13	Izu volcanic arc	32.398	140.365	glass shard	56.49	0.813345	52.64	2.53	0.2992	12.93	1.228	5.05	10.02	0.2284	13.78	0.077		98.7826
Schindlbeck et al. (2018)	IODP 350, site 1436A	350-U1436A-9H-2-95-97	350-U1436A-9H-2-95-97-11	Izu volcanic arc	32.398	140.365	glass shard	56.49	0.813345	53.39	2.53	0.3163	14.09	1.2628	4.33	9.2	0.1398	13.43	0.0993		98.7882
Barnes et al. (2010)	ODP Leg 126, site 782A	782A-23X-4-107-109	782A-23X-4-107-109	Izu volcanic arc	30.861	141.314	glass shards from tephra		8.595	52.3	2.21	0.36	13.61	1.19	4.99	9.59	0.22	14.21	0.11		98.79			1105
Straub and Layne (2003)	ODP Leg 126, site 782A	782A-15X-3-9-10	782A-15X-3-9-10	Izu volcanic arc	30.861	141.314	glass shard		3.78	52.45	2.29	0.36	13.23	1.28	4.61	9.33	0.26	14.88	0.1		98.79	2.2	159	1118	26.3	7.54
Straub (2003)	ODP Leg 126, site 782A	782A-15X-3-9-10	782A-15X-3-9-10-C2	Izu volcanic arc	30.861	141.314	glass shards from tephra		3.78	52.45	2.29	0.36	13.23	1.28	4.61	9.33	0.26	14.88	0.1		98.79	2.2	159	1118	26.3	7.54
Straub and Layne (2003)	ODP Leg 126, site 782A	782A-15X-3-9-10	782A-15X-3-9-10	Izu volcanic arc	30.861	141.314	glass shards from tephra		3.78	52.45	2.29	0.36	13.23	1.28	4.61	9.33	0.26	14.88	0.1		98.79	1.3	159	1118	26.3	7.54
Bryant et al. (2003)	ODP Leg 126, site 782A	782A-20X-CC-9-11	782A-20X-CC-9-11-16A	Izu volcanic arc	30.861	141.314	glass shard	184.1	6.1	55.7	2.59	0.36	13.73	1.07	3.67	8.78	0.11	13.98			98.79
Straub (2003)	ODP Leg 126, site 782A	782A-2H-4-11114	782A-2H-4-11114-38C	Izu volcanic arc	30.861	141.314	clinopyroxene-hosted melt inclusion		0.5	52.77	2.06	0.5	9.18	0.6	5.97	11.25	0.2	16.11	0.15		98.79	1.6	214	1172	17	4.7
Straub and Layne (2003)	ODP Leg 126, site 782A	782A-2H-4-113-114	782A-2H-4-113-114	Izu volcanic arc	30.861	141.314	clinopyroxene-hosted melt inclusion		0.5	52.77	2.06	0.5	9.18	0.6	5.97	11.25	0.2	16.11	0.15		98.79	1.6	214	1172	17	4.7
Straub and Layne (2003)	ODP Leg 126, site 782A	782A-2H-4-113-114	782A-2H-4-113-114	Izu volcanic arc	30.861	141.314	clinopyroxene-hosted melt inclusion			52.77	2.06	0.5	9.18	0.6	5.97	11.25	0.2	16.11	0.15		98.79	1.3	214	1172	17	4.7
Barnes et al. (2010)	ODP Leg 126, site 782A	782A-14X-5-14-17	782A-14X-5-14-17	Izu volcanic arc	30.861	141.314	glass shards from tephra		3.52	54.64	2.41	0.31	11.28	0.75	4.81	9.58	0.22	14.7	0.1		98.8			800
Barnes et al. (2010)	ODP Leg 126, site 782A	782A-2H-4-113-114	782A-2H-4-113-114	Izu volcanic arc	30.861	141.314	plagioclase-hosted melt inclusion		0.546	52.77	2.06	0.52	9.18	0.6	5.97	11.25	0.2	16.11	0.15		98.81			1172
Bryant et al. (2003)	ODP Leg 126, site 782A	782A-20X-CC-9-11	782A-20X-CC-9-11-16A	Izu volcanic arc	30.861	141.314	glass shard	184.1	6.1	55.59	2.6	0.28	12.45	0.87	4.26	9.04	0.14	14.78			98.82
Barnes et al. (2010)	ODP Leg 126, site 782A	782A-23X-4-107-109	782A-23X-4-107-109	Izu volcanic arc	30.861	141.314	glass shards from tephra		8.595	52.45	2.22	0.33	13.57	1.24	4.92	9.5	0.23	14.25	0.11		98.82			1172
Schindlbeck et al. (2018)	IODP 350, site 1436A	350-U1436A-5H-6-6-8	350-U1436A-5H-6-6-8-8	Izu volcanic arc	32.398	140.365	glass shard	33.32	0.458366	52.15	2.7	0.3778	14.94	1.584	4.6	9.2	0.293	12.77	0.2117		98.8265
Barnes et al. (2010)	ODP Leg 126, site 782A	782A-23X-4-107-109	782A-23X-4-107-109	Izu volcanic arc	30.861	141.314	glass shards from tephra		8.595	52.43	2.24	0.33	13.6	1.2	4.96	9.61	0.24	14.11	0.11		98.83			1163
Straub et al. (2004)	ODP Leg 126, site 782A	782A‐23X‐4‐107‐109	782A‐23X‐4‐107‐109	Izu volcanic arc	30.861	141.314	glass shard		8.59	52.5	2.21	0.34	13.61	1.22	4.95	9.5	0.24	14.27	0.1		98.83					7.1		4.72	181	23.2	35	0.3	0.47	71.4	1.69	5	0.91	5.57	1.95	0.76	3.1	0.53	3.95	0.82	2.55	0.39	2.54	0.42	1.28
Bryant et al. (2003)	ODP Leg 125, Site 786A	786A-6X-5-7-9	786A-6X-5-7-9-4C	Izu volcanic arc	30.861	141.314	glass shard	53.7	10.8	54.18	2.27	0.34	13.58	1.07	4.63	9.64	0.1	14.19			98.83
Barnes et al. (2010)	ODP Leg 126, site 782A	782A-39X-1-21-23	782A-39X-1-21-23	Izu volcanic arc	30.861	141.314	glass shards from tephra		33.257	52.06	2.07	0.42	12.83	0.95	5.33	10.54	0.28	14.2	0.15		98.83			230
Barnes et al. (2010)	ODP Leg 126, site 782A	782A-15X-3-9-10	782A-15X-3-9-10	Izu volcanic arc	30.861	141.314	glass shards from tephra		3.78	52.49	2.3	0.37	13.23	1.26	4.6	9.38	0.22	14.89	0.1		98.84			1047
Barnes et al. (2010)	ODP Leg 126, site 782A	782A-32X-6-31-33	782A-32X-6-31-33	Izu volcanic arc	30.861	141.314	glass shards from tephra		13.715	55.5	2.75	0.68	10.69	0.93	4.13	8.47	0.2	15.36	0.15		98.86			1642
Kutterholf et al. (2018)	IODP 352, site U1439A	352-U1439A-4H-7-7-12	352-U1439A-4H-7_7-12 average	Izu volcanic arc	28.4	142.6	glass shard	34.28	3.34834	54.7312	2.81158	0.261	11.8385	1.12749	4.42971	9.3124	0.244867	15.105	0.138145		98.8606					7.55333	50.68	4.13667	225	23.805	37.2633	0.417667	0.286	51.3867	2.011	6.75333	1.13833	6.44	2.37667	1.159	3.44333	0.621333	4.26	0.876333	2.78	0.388	2.74667	0.405333	1.22667
Schindlbeck et al. (2018)	IODP 350, site 1436A	350-U1436A-8H-2-90-92	350-U1436A-8H-2-90-92-2	Izu volcanic arc	32.398	140.365	glass shard	52.48	0.747632	53.56	2.55	0.2834	13.78	1.2394	4.14	9.18	0.2047	13.86	0.0636		98.8611
Schindlbeck et al. (2018)	IODP 350, site 1436A	350-U1436A-2H-1-25-27	350-U1436A-2H-1-25-27-2	Izu volcanic arc	32.398	140.365	glass shard	4.55	0.088	52.78	1.95	0.154	14	0.8672	7.89	8.95	0.2068	12.03	0.0348		98.8628					4.31	50.65	5.18	135.74	27.76	49.76	0.449	0.512	113.32	2.47	7.28	1.407	7.55	3.45	0.927	3.71	0.619	4.55	1.023	2.96	0.398	2.67	0.383	1.49
Schindlbeck et al. (2018)	IODP 350, site 1436A	350-U1436A-8H-2-90-92	350-U1436A-8H-2-90-92-5	Izu volcanic arc	32.398	140.365	glass shard	52.48	0.747632	54.8	2.75	0.2997	12.44	1.1244	3.9	8.62	0.1974	14.67	0.0643		98.8658
Straub and Layne (2002); Straub et al. (2004)	ODP Leg 126, site 782A	782A-15X-3-9-10	782A-15X-3-9-10	Izu volcanic arc	30.861	141.314	glass shard		3.78006	52.49	2.3	0.4	13.23	1.26	4.6	9.38	0.22	14.89	0.1		98.87				24	7		5.01	175.5	22.6	32.8	0.27	0.51	56.4	1.66	5.16	0.91	5.56	2.14	0.86	2.98	0.55	4.1	0.91	2.63	0.39	2.64	0.42	1.2
Straub and Layne (2003)	ODP Leg 126, site 782A	782A-15X-3-9-10	782A-15X-3-9-10	Izu volcanic arc	30.861	141.314	glass shard		3.78	52.49	2.3	0.4	13.23	1.26	4.6	9.38	0.22	14.89	0.1		98.87	1.9	157	1047	24	7
Straub et al. (2004)	ODP Leg 126, site 782A	782A-15X-3-9-10	782A-15X-3-9-10-29-C1	Izu volcanic arc	30.861	141.314	glass shards from tephra		3.845	52.49	2.3	0.4	13.23	1.26	4.6	9.38	0.22	14.89	0.1		98.87				24	7		5.01	175.5	22.6	32.8	0.27	0.51	56.4	1.66	5.16	0.91	5.56	2.14	0.86	2.98	0.55	4.1	0.91	2.63	0.39	2.64	0.42	1.2
Straub (2003)	ODP Leg 126, site 782A	782A-15X-3-9-10	782A-15X-3-9-10-C1	Izu volcanic arc	30.861	141.314	glass shards from tephra		3.78	52.49	2.3	0.4	13.23	1.26	4.6	9.38	0.22	14.89	0.1		98.87	1.9	157	1047	24	7
Straub and Layne (2003)	ODP Leg 126, site 782A	782A-15X-3-9-10	782A-15X-3-9-10	Izu volcanic arc	30.861	141.314	glass shards from tephra		3.78	52.49	2.3	0.4	13.23	1.26	4.6	9.38	0.22	14.89	0.1		98.87	1.3	157	1047	24	7
Schindlbeck et al. (2018)	IODP 350, site 1436A	350-U1436A-5H-6-6-8	350-U1436A-5H-6-6-8-3	Izu volcanic arc	32.398	140.365	glass shard	33.32	0.458366	51.65	2.65	0.3548	14.76	1.4295	4.86	9.26	0.2152	13.59	0.1027		98.8722
Bryant et al. (2003)	ODP Leg 126, site 782A	782A-14X2-141-143	782A-14X2-113-115-7A	Izu volcanic arc	30.861	141.314	glass shard	127.2	3.9	56.51	2.81	0.35	11.91	0.91	3.72	8.5	0.15	15.14			98.89
Schindlbeck et al. (2018)	IODP 350, site 1436A	350-U1436A-1H-1-84-86	350-U1436A-1H-1-84-86-4	Izu volcanic arc	32.398	140.365	glass shard	2.41	0.0438292	56.53	2.97	0.4351	14.84	1.4581	2.52	7.56	0.2552	12.23	0.0978		98.8962					5.88	54.11	3.61	125.32	23.17	36.99	0.392	0.282	74.23	1.981	6.15	1.065	6.3	2.43	1.085	3.29	0.563	4.31	0.87	2.95	0.36	2.87	0.427	1.49
Schindlbeck et al. (2018)	IODP 350, site 1436A	350-U1436A-9H-4-93-94	350-U1436A-9H-4-93-94-10	Izu volcanic arc	32.398	140.365	glass shard	56.64	0.815803	53.89	2.52	0.3066	12.01	0.9597	4.95	9.45	0.17	14.56	0.0926		98.9089
Bryant et al. (2003)	ODP Leg 126, site 782A	782A-26X-1-141-144	782A-26X-1-141-144-12A	Izu volcanic arc	30.861	141.314	glass shard	241.7	8.1	55.8	2.13	0.26	16.73	1.51	4.45	7.89	0.2	11.03			98.91
Bryant et al. (2003)	ODP Leg 125, Site 786A	786A-6X-5-7-9	786A-6X-5-7-9-4C	Izu volcanic arc	30.861	141.314	glass shard	53.7	10.8	54.53	2.13	0.25	13.48	1	4.59	9.52	0.13	14.37			98.91
Barnes et al. (2010)	ODP Leg 126, site 782A	782A-29X-3-9-11	782A-29X-3-9-11	Izu volcanic arc	30.861	141.314	glass shards from tephra		11.514	53.03	2.26	0.24	13.52	1.15	4.9	9.7	0.27	13.7	0.15		98.92			810
Schindlbeck et al. (2018)	IODP 350, site 1436A	350-U1436A-9H-3-9	350-U1436A-9H-3-9-11-1	Izu volcanic arc	32.398	140.365	glass shard	56.64	0.815803	54.37	2.53	0.3261	12.85	1.1952	4.54	9.35	0.2672	13.38	0.1201		98.9286
Straub and Layne (2003)	ODP Leg 126, site 782A	782A-19X-1-147-149	782A-19X-1-147-149	Izu volcanic arc	30.861	141.314	plagioclase-hosted melt inclusion		6.03	53.87	1.93	0.19	9.74	0.59	6.11	10.63	0.2	15.58	0.09		98.93	1.85	100	838	9	6
Straub (2003)	ODP Leg 126, site 782A	782A-19X-1-147-149	782A-19X-1-147-149-12C	Izu volcanic arc	30.861	141.314	plagioclase-hosted melt inclusion		6.03	53.87	1.93	0.19	9.74	0.59	6.11	10.63	0.2	15.58	0.09		98.93	1.85	100	838	9	6
Straub and Layne (2003)	ODP Leg 126, site 782A	782A-19X-1-147-149	782A-19X-1-147-149	Izu volcanic arc	30.861	141.314	plagioclase-hosted melt inclusion		6.03	53.87	1.93	0.19	9.74	0.59	6.11	10.63	0.2	15.58	0.09		98.93	1.07	100	838	9	6
Barnes et al. (2010)	ODP Leg 126, site 782A	782A-19X-2-24-26	782A-19X-2-24-26	Izu volcanic arc	30.861	141.314	plagioclase-hosted melt inclusion		6.031	53.87	1.93	0.19	9.74	0.59	6.11	10.63	0.2	15.58	0.09		98.93			838
Barnes et al. (2010)	ODP Leg 126, site 782A	782A-23X-4-107-109	782A-23X-4-107-109	Izu volcanic arc	30.861	141.314	glass shards from tephra		8.595	52.5	2.21	0.33	13.61	1.22	4.95	9.5	0.24	14.27	0.1		98.93			1108
Bryant et al. (2003)	ODP Leg 126, site 782A	782A-35X-6-130-136	782A-35X-6-130-136-24A	Izu volcanic arc	30.861	141.314	glass shard		24	54.87	2.62	0.34	13.26	1.24	3.98	8.82	0.21	14.66			98.93						47	6.2	188	26.2	40.3	0.354	0.62	90	1.84	5.84	1.12	6.17	2.37	0.88	3.36		4.13		2.83		2.71		1.44
Straub and Layne (2003)	ODP Leg 126, site 782A	782A-39-X-1-21-23	782A-39-X-1-21-23	Izu volcanic arc	30.861	141.314	glass shards from tephra		29.61	52.32	2	0.24	12.4	0.92	5.51	10.13	0.26	15.04	0.11		98.93	1.2	106	891	21	6.1
Straub and Layne (2003)	ODP Leg 126, site 782A	782A-39X-1-21-23	782A-39X-1-21-23	Izu volcanic arc	30.861	141.314	glass shard		29.6	52.32	2	0.24	12.4	0.92	5.51	10.13	0.26	15.04	0.11		98.93	1.8	106	891	21	6.1
Straub (2003)	ODP Leg 126, site 782A	782A-39X-1-21-23	782A-39X-1-21-23-5	Izu volcanic arc	30.861	141.314	glass shards from tephra		29.6	52.32	2	0.24	12.4	0.92	5.51	10.13	0.26	15.04	0.11		98.93	1.8	106	891	21	6.1
Straub and Layne (2003); Straub et al. (2004)	ODP Leg 126, site 782A	782A-23X-4-107-109	782A-23X-4-107-109	Izu volcanic arc	30.861	141.314	glass shard		8.59	52.5	2.21	0.34	13.61	1.22	4.95	9.5	0.24	14.27	0.1		98.94	1.8	157	1108	18.3	7.1		4.72	181	23.2	35	0.3	0.47	71.4	1.69	5	0.91	5.57	1.95	0.76	3.1	0.53	3.95	0.82	2.55	0.39	2.54	0.42	1.28
Straub et al. (2004)	ODP Leg 126, site 782A	782A-23X-4-107-109	782A-23X-4-107-109-59B1	Izu volcanic arc	30.861	141.314	glass shards from tephra		8.595	52.5	2.21	0.34	13.61	1.22	4.95	9.5	0.24	14.27	0.1		98.94				18	7.1		4.72	181	23.2	35	0.3	0.47	71.4	1.69	5	0.91	5.57	1.95	0.76	3.1	0.53	3.95	0.82	2.55	0.39	2.54	0.42	1.28
Straub (2003)	ODP Leg 126, site 782A	782A-23X-4-107-109	782A-23X-4-107-109-B1	Izu volcanic arc	30.861	141.314	glass shards from tephra		8.59	52.5	2.21	0.34	13.61	1.22	4.95	9.5	0.24	14.27	0.1		98.94	1.8	157	1108	18.3	7.1
Straub and Layne (2003)	ODP Leg 126, site 782A	782A-23X-4-107-109	782A-23X-4-107-109	Izu volcanic arc	30.861	141.314	glass shards from tephra		8.59	52.5	2.21	0.34	13.61	1.22	4.95	9.5	0.24	14.27	0.1		98.94	1.2	157	1108	18.3	7.1
Bryant et al. (2003)	ODP Leg 125, Site 786A	786A-5X-1-74-76	786A-5X-1-74-76-2C	Izu volcanic arc	31.88	141.23	glass shard	38.9	5.6	53.96	2.55	0.21	13.68	1.16	4.2	9.46	0.17	14.62			98.94
Barnes et al. (2010)	ODP Leg 126, site 782A	782A-39X-1-21-23	782A-39X-1-21-23	Izu volcanic arc	30.861	141.314	glass shards from tephra		33.257	52.32	2	0.26	12.4	0.92	5.51	10.13	0.26	15.04	0.11		98.95			891
Barnes et al. (2010)	ODP Leg 126, site 782A	782A-6H-6-55-57	782A-6H-6-55-57	Izu volcanic arc	30.861	141.314	glass shards from tephra		1.925	53.8	3.12	0.37	13.23	1.18	4.19	8.69	0.26	14.11			98.95
Bryant et al. (2003)	ODP Leg 125, Site 786A	786A-6X-5-7-9	786A-6X-5-7-9-4C	Izu volcanic arc	30.861	141.314	glass shard	53.7	10.8	54.78	1.96	0.28	14.01	1.24	4.48	9.37	0.13	13.76			98.96
Schindlbeck et al. (2018)	IODP 350, site 1436A	350-U1436A-6H-3-77-79	350-U1436A-6H-3-77-79-9	Izu volcanic arc	32.398	140.365	glass shard	39.07	0.528428	55.09	2.25	0.301	13.3	1.1189	3.56	9.01	0.2357	14.06	0.0378		98.9634
Schindlbeck et al. (2018)	IODP 350, site 1436A	350-U1436A-5H-5-132-134	350-U1436A-5H-5-132-134-3	Izu volcanic arc	32.398	140.365	glass shard	33.08	0.455442	52.21	2.05	0.2363	13.53	0.9937	5.69	10.69	0.3313	13.18	0.0525		98.9638
Bryant et al. (2003)	ODP Leg 126, site 782A	782A-1H-3-22-24	782A-1H-3-22-24-1A	Izu volcanic arc	30.861	141.314	glass shard	3.2	0.25	53.56	2.08	0.32	13.58	0.97	4.96	10.52	0.12	13.89			98.97
Schindlbeck et al. (2018)	IODP 350, site 1436A	350-U1436A-4H-4-63-65	350-U1436A-4H-4-63-65-1	Izu volcanic arc	32.398	140.365	glass shard	21.93	0.319582	53.95	2.46	0.2354	13.5	1.2166	4.07	8.96	0.2415	14.23	0.1076		98.9711
Schindlbeck et al. (2018)	IODP 350, site 1436A	350-U1436A-12F-2-10-12	350-U1436A-12F-2-10-12-13	Izu volcanic arc	32.398	140.365	glass shard	64.4	0.942966	53.22	2.36	0.2534	12.59	1.009	5.11	9.94	0.1969	14.24	0.0587		98.978
Schindlbeck et al. (2018)	IODP 350, site 1436A	350-U1436A-6H-3-77-79	350-U1436A-6H-3-77-79-13	Izu volcanic arc	32.398	140.365	glass shard	39.07	0.528428	55.53	1.89	0.322	13.39	1.1017	3.35	8.97	0.2993	14.04	0.0859		98.9789
Schindlbeck et al. (2018)	IODP 350, site 1436A	350-U1436A-7H-4-16-18	350-U1436A-7H-4-16-18-14	Izu volcanic arc	32.398	140.365	glass shard	47.77	0.67045	56.35	3.47	0.3538	11.89	1.21	3.16	7.85	0.2153	14.34	0.152		98.9911
Bryant et al. (2003)	ODP Leg 125, Site 786A	786A-5X-1-74-76	786A-5X-1-74-76-2C	Izu volcanic arc	31.88	141.23	glass shard	38.9	5.6	54.22	2.51	0.19	13.72	1.15	3.95	9.4	0.11	14.74			99
Barnes et al. (2010)	ODP Leg 126, site 782A	782A-6H-6-55-57	782A-6H-6-55-57	Izu volcanic arc	30.861	141.314	glass shards from tephra		1.925	55.67	2.72	0.39	12.81	1.18	3.67	8.27	0.26	14.03			99
Kutterholf et al. (2018)	IODP 352, site U1440A	352-U1440A-7H-5-54-56	352-U1440A-7H-5_54-56 average	Izu volcanic arc	28.45	142.65	glass shard	55.41	3.90736	54.705	2.1142	0.329685	12.4493	0.842095	4.89612	9.9494	0.229717	14.4273	0.0570543		99.0011					5.44667	55.6767	4.32333	172.497	19.2767	31.4833	0.276	0.443	53.9133	1.38767	4.48333	0.860667	4.92333	2.07333	0.758333	2.59	0.499333	3.36667	0.746	2.14	0.3	2.36	0.383667	1.22333
Barnes et al. (2010)	ODP Leg 126, site 782A	782A-6H-6-55-57	782A-6H-6-55-57	Izu volcanic arc	30.861	141.314	glass shards from tephra		1.925	54.63	2.72	0.41	12.76	1.15	3.95	8.44	0.26	14.57	0.12		99.01			1442
Kutterholf et al. (2018)	IODP 352, site U1439A	352-U1439A-7H-4-61-63	352-U1439A-7H-4_61-63 average	Izu volcanic arc	28.4	142.6	glass shard	59.43	7.33271	55.5788	2.48851	0.340797	12.6965	1.17609	4.22277	9.23198	0.215756	13.9692	0.0795325		99.0104					8.26667	57.3633	5.38667	199.68	24.42	34.1667	0.291	0.593667	98.14	1.56867	5.22333	0.996333	5.42333	2.16667	0.890333	3.16	0.613667	4.29667	0.931333	2.76333	0.431	2.94667	0.391667	1.26333
Schindlbeck et al. (2018)	IODP 350, site 1436A	350-U1436A-8H-2-90-92	350-U1436A-8H-2-90-92-1	Izu volcanic arc	32.398	140.365	glass shard	52.48	0.747632	54.41	2.41	0.314	13.57	1.2077	4.41	9.33	0.2279	13.04	0.0945		99.0141
Bryant et al. (2003)	ODP Leg 125, Site 786A	786A-6X-5-7-9	786A-6X-5-7-9-4C	Izu volcanic arc	30.861	141.314	glass shard	53.7	10.8	54.21	2.32	0.32	13.15	1.06	4.62	9.62	0.15	14.54			99.02
Schindlbeck et al. (2018)	IODP 350, site 1436A	350-U1436A-9H-4-120-122	350-U1436A-9H-4-120-122-4	Izu volcanic arc	32.398	140.365	glass shard	56.64	0.815803	52.97	2.77	0.3715	13.76	1.2468	4.41	8.98	0.2711	14.12	0.1224		99.0218
Schindlbeck et al. (2018)	IODP 350, site 1436A	350-U1436A-9H-4-120-122	350-U1436A-9H-4-120-122-1	Izu volcanic arc	32.398	140.365	glass shard	56.64	0.815803	53.04	2.4	0.8153	15.06	1.68	3.65	9.1	0.2589	12.89	0.1393		99.0335
Bryant et al. (2003)	ODP Leg 126, site 782A	782A-20X-CC-9-11	782A-20X-CC-9-11-16A	Izu volcanic arc	30.861	141.314	glass shard	184.1	6.1	56.01	2.46	0.31	13.59	1	3.75	8.79	0.09	13.99			99.06
Bryant et al. (2003)	ODP Leg 126, site 782A	782A-20X-CC-9-11	782A-20X-CC-9-11-16A	Izu volcanic arc	30.861	141.314	glass shard	184.1	6.1	56.34	2.79	0.38	13.39	1.03	3.49	8.53	0.13	13.94			99.08
Schindlbeck et al. (2018)	IODP 350, site 1436A	350-U1436A-2H-3-18-20	350-U1436A-2H-3-18-20-11	Izu volcanic arc	32.398	140.365	glass shard	4.55	0.088	53.51	2.01	0.211	13.96	1.1106	6.99	8.87	0.3627	11.98	0.0842		99.0885
Schindlbeck et al. (2018)	IODP 350, site 1436A	350-U1436A-5H-6-6-8	350-U1436A-5H-6-6-8-6	Izu volcanic arc	32.398	140.365	glass shard	33.32	0.458366	51.92	2.27	0.244	12.73	0.9496	5.96	10.77	0.2501	13.96	0.0409		99.0946
Barnes et al. (2010)	ODP Leg 126, site 782A	782A-39X-1-21-23	782A-39X-1-21-23	Izu volcanic arc	30.861	141.314	glass shards from tephra		33.257	55.67	2.57	0.46	10.95	0.96	4.14	8.55	0.21	15.45	0.14		99.1			1407
Barnes et al. (2010)	ODP Leg 126, site 782A	782A-19X-2-24-26	782A-19X-2-24-26	Izu volcanic arc	30.861	141.314	plagioclase-hosted melt inclusion		6.031	54.93	2	0.26	8.95	0.56	5.92	10.46	0.18	15.75	0.1		99.11			778
Bryant et al. (2003)	ODP Leg 126, site 782A	782A-20X-CC-9-11	782A-20X-CC-9-11-16A	Izu volcanic arc	30.861	141.314	glass shard	184.1	6.1	56.01	2.43	0.3	13.24	0.99	3.89	8.8	0.05	14.3			99.13
Bryant et al. (2003)	ODP Leg 126, site 782A	782A-6H-1-138-140	782A-6H-1-138-140-3A	Izu volcanic arc	30.861	141.314	glass shard	49.2	1.8	55.08	2.64	0.33	13.97	1.06	4	9.17	0.19	13.57			99.13
Bryant et al. (2003)	ODP Leg 125, Site 786A	786A-5X-1-74-76	786A-5X-1-74-76-2C	Izu volcanic arc	31.88	141.23	glass shard	38.9	5.6	53.98	2.56	0.18	13.56	1.14	4.33	9.46	0.21	14.59			99.13
Bryant et al. (2003)	ODP Leg 125, Site 786A	786A-6X-5-7-9	786A-6X-5-7-9-4C	Izu volcanic arc	30.861	141.314	glass shard	53.7	10.8	54.32	2.25	0.29	13.21	1.09	4.66	9.65	0.11	14.41			99.13
Schindlbeck et al. (2018)	IODP 350, site 1436A	350-U1436A-8H-2-90-92	350-U1436A-8H-2-90-92-10	Izu volcanic arc	32.398	140.365	glass shard	52.48	0.747632	55.03	2.76	0.3069	12.49	1.1129	3.9	8.47	0.2412	14.74	0.0793		99.1303
Schindlbeck et al. (2018)	IODP 350, site 1436A	350-U1436A-1H-2-91-93	350-U1436A-1H-2-91-93-6	Izu volcanic arc	32.398	140.365	glass shard	2.41	0.0438292	53	1.93	0.2415	14.14	1.0379	6.31	9.98	0.2394	12.18	0.0759		99.1347
Bryant et al. (2003)	ODP Leg 126, site 782A	782A-6H-1-138-140	782A-6H-1-138-140-3A	Izu volcanic arc	30.861	141.314	glass shard	49.2	1.8	54.71	2.59	0.31	13.09	0.96	4.71	9.35	0.04	14.26			99.14
Schindlbeck et al. (2018)	IODP 350, site 1436A	350-U1436A-9H-3-38-40	350-U1436A-9H-3-38-40-14	Izu volcanic arc	32.398	140.365	glass shard	56.93	0.820555	53.25	2.59	0.3224	12.86	1.1651	5.17	9.78	0.2169	13.75	0.0545		99.1589
Schindlbeck et al. (2018)	IODP 350, site 1436A	350-U1436A-5H-6-6-8	350-U1436A-5H-6-6-8-5	Izu volcanic arc	32.398	140.365	glass shard	33.32	0.458366	52.1	2.21	0.2817	12.48	0.9187	5.95	10.71	0.2878	14.18	0.0479		99.1661
Schindlbeck et al. (2018)	IODP 350, site 1436A	350-U1436A-6H-2-5	350-U1436A-6H-2-5-7-10	Izu volcanic arc	32.398	140.365	glass shard	36.85	0.501378	53.61	2.45	0.2672	12.9	0.9203	4.97	9.52	0.2971	14.15	0.0848		99.1694
Barnes et al. (2010)	ODP Leg 126, site 782A	782A-2H-4-113-114	782A-2H-4-113-114	Izu volcanic arc	30.861	141.314	glass shards from tephra		0.546	55.93	2.29	0.54	11.92	1.1	4.74	9.23	0.16	13.1	0.16		99.17			210
Schindlbeck et al. (2018)	IODP 350, site 1436A	350-U1436A-8H-1-5-7	350-U1436A-8H-1-5-7-7	Izu volcanic arc	32.398	140.365	glass shard	50.45	0.714367	53.87	2.82	0.284	12.96	1.1189	4.34	9.12	0.3207	14.28	0.0597		99.1733
Barnes et al. (2010)	ODP Leg 126, site 782A	782A-29X-3-9-11	782A-29X-3-9-11	Izu volcanic arc	30.861	141.314	glass shards from tephra		11.514	53.14	2.35	0.29	13.87	1.22	4.61	9.62	0.24	13.7	0.14		99.18			580
Bryant et al. (2003)	ODP Leg 126, site 782A	782A-6H-1-138-140	782A-6H-1-138-140-3A	Izu volcanic arc	30.861	141.314	glass shard	49.2	1.8	54.58	2.59	0.34	13.12	0.98	4.51	9.56	0.1	14.21			99.19
Kutterholf et al. (2018)	IODP 352, site U1441A	352-U1441A-5R-1-39-41	352-U1441A-5R-1_39-41 average	Izu volcanic arc	28.43	142.73	glass shard	34.61	7.259	56.3128	2.39942	0.377453	12.2512	1.11991	3.57486	8.91167	0.20085	14.7888	0.0630242		99.1914					7.56333	68.8933	4.98	200.493	25.0133	35.81	0.338333	0.683	89.17	1.517	4.85667	0.927667	5.34	2.52	0.891	3.21667	0.58	4.17	0.96	2.82333	0.425667	3.05667	0.505	1.33667
Schindlbeck et al. (2018)	IODP 350, site 1436A	350-U1436A-5H-5-132-134	350-U1436A-5H-5-132-134-4	Izu volcanic arc	32.398	140.365	glass shard	33.08	0.455442	52.16	1.72	0.2479	13.52	0.939	6.06	11.23	0.2584	12.98	0.0795		99.1948
Schindlbeck et al. (2018)	IODP 350, site 1436A	350-U1436A-5H-5-132-134	350-U1436A-5H-5-132-134-22	Izu volcanic arc	32.398	140.365	glass shard	33.08	0.455442	51.49	1.97	0.241	12.83	0.9323	6.07	11.66	0.1283	13.8	0.0816		99.2032
Bryant et al. (2003)	ODP Leg 125, Site 786A	786A-6X-5-7-9	786A-6X-5-7-9-4C	Izu volcanic arc	30.861	141.314	glass shard	53.7	10.8	54.33	2.23	0.27	13.12	1.1	4.72	9.56	0.16	14.51			99.21
Kutterholf et al. (2018)	IODP 352, site U1439A	352-U1439A-7H-4-36-45	352-U1439A-7H-4_36-45 average	Izu volcanic arc	28.4	142.6	glass shard	59.25	7.2589	56.3285	2.19098	0.368417	12.1862	1.03872	3.89265	9.05723	0.217134	14.6622	0.0579438		99.2158					6.25333	48.0533	6.74333	216.017	26.4867	40	0.383	0.816667	114.427	1.88667	5.78333	1.07933	6.12333	2.45667	0.919333	3.87667	0.619	4.65333	0.937	3.19333	0.442	3.07333	0.491333	1.50333
Schindlbeck et al. (2018)	IODP 350, site 1436A	350-U1436A-4H-4-63-65	350-U1436A-4H-4-63-65-11	Izu volcanic arc	32.398	140.365	glass shard	21.93	0.319582	53.25	2.48	0.2314	14.19	1.2602	4.63	9.22	0.3137	13.57	0.0751		99.2204
Bryant et al. (2003)	ODP Leg 126, site 782A	782A-6H-1-138-140	782A-6H-1-138-140-3A	Izu volcanic arc	30.861	141.314	glass shard	49.2	1.8	54.68	2.66	0.33	13.34	0.97	4.36	9.4	0.09	14.17			99.23
Schindlbeck et al. (2018)	IODP 350, site 1436A	350-U1436A-9H-4-120-122	350-U1436A-9H-4-120-122-14	Izu volcanic arc	32.398	140.365	glass shard	56.64	0.815803	53.69	2.78	0.4045	14.56	1.3555	3.93	8.63	0.2695	13.51	0.1006		99.2301
Schindlbeck et al. (2018)	IODP 350, site 1436A	350-U1436A-6H-3-77-79	350-U1436A-6H-3-77-79-6	Izu volcanic arc	32.398	140.365	glass shard	39.07	0.528428	55.16	2.06	0.3003	13.16	1.0918	3.64	9.19	0.2247	14.39	0.0227		99.2395
Bryant et al. (2003)	ODP Leg 126, site 782A	782A-6H-1-138-140	782A-6H-1-138-140-3A	Izu volcanic arc	30.861	141.314	glass shard	49.2	1.8	55.02	2.52	0.3	13.6	0.98	4.27	9.28	0.13	13.91			99.24
Bryant et al. (2003)	ODP Leg 126, site 782A	782A-20X-CC-9-11	782A-20X-CC-9-11-16A	Izu volcanic arc	30.861	141.314	glass shard	184.1	6.1	56.41	2.53	0.29	13.22	1.03	3.64	8.61	0.14	14.14			99.25
Bryant et al. (2003)	ODP Leg 125, Site 786A	786A-5X-1-74-76	786A-5X-1-74-76-2C	Izu volcanic arc	31.88	141.23	glass shard	38.9	5.6	54	2.58	0.19	13.62	1.15	4.3	9.41	0.12	14.63			99.25
Bryant et al. (2003)	ODP Leg 125, Site 786A	786A-6X-5-7-9	786A-6X-5-7-9-4C	Izu volcanic arc	30.861	141.314	glass shard	53.7	10.8	54.28	2.23	0.27	13.09	1.12	4.78	9.6	0.16	14.48			99.25
Schindlbeck et al. (2018)	IODP 350, site 1436A	350-U1436A-4H-5-39-41	350-U1436A-4H-5-39-41-13	Izu volcanic arc	32.398	140.365	glass shard	23.19	0.334935	53.02	2.66	0.2524	14.59	1.3898	4.2	8.95	0.242	13.84	0.1142		99.2584
Schindlbeck et al. (2018)	IODP 350, site 1436A	350-U1436A-9H-4-120-122	350-U1436A-9H-4-120-122-11	Izu volcanic arc	32.398	140.365	glass shard	56.64	0.815803	53.75	2.67	0.3115	12.86	1.066	4.65	9.34	0.239	14.29	0.0833		99.2598
Bryant et al. (2003)	ODP Leg 126, site 782A	782A-6H-1-138-140	782A-6H-1-138-140-3A	Izu volcanic arc	30.861	141.314	glass shard	49.2	1.8	54.29	2.33	0.34	12.21	0.88	5.1	10.34	0.06	14.46			99.27
Bryant et al. (2003)	ODP Leg 125, Site 786A	786A-6X-5-7-9	786A-6X-5-7-9-4C	Izu volcanic arc	30.861	141.314	glass shard	53.7	10.8	54.11	2.43	0.3	13.29	1.15	4.69	9.54	0.16	14.33			99.27
Schindlbeck et al. (2018)	IODP 350, site 1436A	350-U1436A-4H-5-39-41	350-U1436A-4H-5-39-41-2	Izu volcanic arc	32.398	140.365	glass shard	23.19	0.334935	55.03	2.94	0.2025	12.24	1.0792	3.29	8.7	0.2926	15.46	0.0457		99.28					7.42	47.59	3.04	160.1	23.81	38.79	0.358	0.412	109.81	1.431	5.07	0.997	5.86	1.7	0.801	2.69	0.622	4.48	0.913	2.66	0.439	2.68	0.505	1.56
Bryant et al. (2003)	ODP Leg 126, site 782A	782A-6H-1-138-140	782A-6H-1-138-140-3A	Izu volcanic arc	30.861	141.314	glass shard	49.2	1.8	54.94	2.63	0.32	13.14	1.01	4.31	9.37	0.12	14.17			99.29
Bryant et al. (2003)	ODP Leg 126, site 782A	782A-14X2-141-143	782A-14X2-113-115-7A	Izu volcanic arc	30.861	141.314	glass shard	127.2	3.9	56.5	2.15	0.35	15.23	1.53	3	8.76	0.15	12.32			99.3
Schindlbeck et al. (2018)	IODP 350, site 1436A	350-U1436A-6H-3-77-79	350-U1436A-6H-3-77-79-14	Izu volcanic arc	32.398	140.365	glass shard	39.07	0.528428	55.52	2	0.291	12.33	1.0929	3.67	9.14	0.2342	15.01	0.0233		99.3114
Bryant et al. (2003)	ODP Leg 125, Site 786A	786A-6X-5-7-9	786A-6X-5-7-9-4C	Izu volcanic arc	30.861	141.314	glass shard	53.7	10.8	54.16	2.26	0.32	13.38	1.1	4.7	9.48	0.21	14.4			99.33				35	7.6	50	4.5	161	25.5	47.3	0.187	0.65	85	1.54	5.13	1	6.04	2.23	0.9	3.24		4.07		2.64		2.81		1.53
Barnes et al. (2010)	ODP Leg 126, site 782A	782A-32X-6-31-33	782A-32X-6-31-33	Izu volcanic arc	30.861	141.314	glass shards from tephra		13.715	55.32	2.79	0.71	10.94	0.93	4.09	8.75	0.22	15.42	0.16		99.33			1410
Bryant et al. (2003)	ODP Leg 126, site 782A	782A-20X-CC-9-11	782A-20X-CC-9-11-16A	Izu volcanic arc	30.861	141.314	glass shard	184.1	6.1	56.52	2.18	0.36	12.75	0.95	3.73	8.78	0	14.73			99.34
Barnes et al. (2010)	ODP Leg 126, site 782A	782A-6H-6-55-57	782A-6H-6-55-57	Izu volcanic arc	30.861	141.314	glass shards from tephra		1.925	55.15	2.5	0.37	12.24	1.06	4.09	8.66	0.22	14.96	0.09		99.34			1655
Schindlbeck et al. (2018)	IODP 350, site 1436A	350-U1436A-5H-5-132-134	350-U1436A-5H-5-132-134-21	Izu volcanic arc	32.398	140.365	glass shard	33.08	0.455442	52.19	2.06	0.2899	14.81	1.202	5.15	10.6	0.2497	12.73	0.0612		99.3428
Schindlbeck et al. (2018)	IODP 350, site 1436A	350-U1436A-5H-6-6-8	350-U1436A-5H-6-6-8-12	Izu volcanic arc	32.398	140.365	glass shard	33.32	0.458366	52.48	2.53	0.3996	15.9	1.5599	4.55	9.12	0.2606	12.43	0.1188		99.3489
Bryant et al. (2003)	ODP Leg 126, site 782A	782A-20X-CC-9-11	782A-20X-CC-9-11-16A	Izu volcanic arc	30.861	141.314	glass shard	184.1	6.1	56.49	2.07	0.33	13.16	1.03	3.74	8.72	0.16	14.29			99.38
Bryant et al. (2003)	ODP Leg 126, site 782A	782A-6H-1-138-140	782A-6H-1-138-140-3A	Izu volcanic arc	30.861	141.314	glass shard	49.2	1.8	56.44	2.11	0.35	15.32	1.54	3.32	8.68	0.14	12.09			99.4
Schindlbeck et al. (2018)	IODP 350, site 1436A	350-U1436A-5H-2-137-139	350-U1436A-5H-2-137-139-3	Izu volcanic arc	32.398	140.365	glass shard	28.7	0.402073	52.82	2.14	0.2751	13.55	1.2094	5.2	10.1	0.2329	13.82	0.0671		99.4145					8.38	49.45	4.29	168.94	28.7	51.52	0.406	0.723	145.21	1.94	6.97	1.355	7.13	2.78	1.03	3.31	0.744	5.36	0.939	3.29	0.455	3.11	0.49	1.57
Bryant et al. (2003)	ODP Leg 126, site 782A	782A-20X-CC-9-11	782A-20X-CC-9-11-16A	Izu volcanic arc	30.861	141.314	glass shard	184.1	6.1	56.15	2.2	0.32	13.47	0.97	3.85	8.79	0.1	14.14			99.42
Bryant et al. (2003)	ODP Leg 126, site 782A	782A-20X-CC-9-11	782A-20X-CC-9-11-16A	Izu volcanic arc	30.861	141.314	glass shard	184.1	6.1	56	2.42	0.29	13.72	1	3.81	8.67	0.1	13.99			99.43
Bryant et al. (2003)	ODP Leg 126, site 782A	782A-20X-CC-9-11	782A-20X-CC-9-11-16A	Izu volcanic arc	30.861	141.314	glass shard	184.1	6.1	56.1	2.36	0.33	13.2	1.06	3.84	8.72	0.12	14.26			99.43
Bryant et al. (2003)	ODP Leg 126, site 782A	782A-20X-CC-9-11	782A-20X-CC-9-11-16A	Izu volcanic arc	30.861	141.314	glass shard	184.1	6.1	56.12	2.26	0.34	13.49	1.03	3.7	8.81	0.21	14.02			99.43
Barnes et al. (2010)	ODP Leg 126, site 782A	782A-39X-1-21-23	782A-39X-1-21-23	Izu volcanic arc	30.861	141.314	glass shards from tephra		33.257	54.97	2.74	0.57	12.21	1.12	3.95	8.54	0.24	14.95	0.14		99.43			1893
Barnes et al. (2010)	ODP Leg 126, site 782A	782A-6H-6-55-57	782A-6H-6-55-57	Izu volcanic arc	30.861	141.314	glass shards from tephra		1.925	53.81	2.44	0.36	13.52	1.18	4.56	9.11	0.21	14.16	0.09		99.44			1228
Barnes et al. (2010)	ODP Leg 126, site 782A	782A-6H-6-55-57	782A-6H-6-55-57	Izu volcanic arc	30.861	141.314	glass shards from tephra		1.925	55.33	2.72	0.44	13.65	1.32	3.79	8.37	0.3	13.53			99.45
Bryant et al. (2003)	ODP Leg 126, site 782A	782A-20X-CC-9-11	782A-20X-CC-9-11-16A	Izu volcanic arc	30.861	141.314	glass shard	184.1	6.1	55.79	2.46	0.28	13.46	1.04	3.86	8.83	0.13	14.15			99.46
Bryant et al. (2003)	ODP Leg 126, site 782A	782A-20X-CC-9-11	782A-20X-CC-9-11-16A	Izu volcanic arc	30.861	141.314	glass shard	184.1	6.1	56.18	2.47	0.3	13.27	0.98	3.83	8.67	0.14	14.17			99.46
Kutterholf et al. (2018)	IODP 352, site U1441A	352-U1441A-9R-1-88-90	352-U1441A-9R-1_88-90 average	Izu volcanic arc	28.43	142.73	glass shard	74.1	12.0272	55.0036	2.13418	0.264537	12.5898	0.924775	4.34353	9.45563	0.242971	14.9918	0.0492309		99.4622					6.15333	50.5833	3.61667	219.563	18.1533	27.7267	0.194	0.557333	71.8833	0.976333	3.45	0.66	4.29333	1.30333	0.670667	2.85667	0.435667	3.02	0.653667	2.14667	0.317333	2.13667	0.313333	0.91
Bryant et al. (2003)	ODP Leg 125, Site 786A	786A-6X-5-7-9	786A-6X-5-7-9-4C	Izu volcanic arc	30.861	141.314	glass shard	53.7	10.8	54.07	2.45	0.31	13.09	1.1	4.72	9.58	0.15	14.54			99.47				28	8.6	52	4.4	160	24.5	46	0.221	0.63	82	1.41	4.97	0.97	5.78	2.27	0.89	3.11		4.06		2.59		2.67		1.48
Schindlbeck et al. (2018)	IODP 350, site 1436A	350-U1436A-8H-3-58-60	350-U1436A-8H-3-58-60-12	Izu volcanic arc	32.398	140.365	glass shard	53.56	0.765331	53.35	2.47	0.2713	14.1	1.1584	4.79	9.29	0.2581	13.71	0.1088		99.5066
Bryant et al. (2003)	ODP Leg 126, site 782A	782A-20X-CC-9-11	782A-20X-CC-9-11-16A	Izu volcanic arc	30.861	141.314	glass shard	184.1	6.1	55.75	2.6	0.31	13.56	1	3.84	8.79	0.04	14.11			99.52
Bryant et al. (2003)	ODP Leg 125, Site 786A	786A-6X-5-7-9	786A-6X-5-7-9-4C	Izu volcanic arc	30.861	141.314	glass shard	53.7	10.8	54.28	2.36	0.3	13.19	1.05	4.63	9.54	0.12	14.52			99.52
Bryant et al. (2003)	ODP Leg 126, site 782A	782A-20X-CC-9-11	782A-20X-CC-9-11-16A	Izu volcanic arc	30.861	141.314	glass shard	184.1	6.1	56.09	2.44	0.3	13.31	1.02	3.76	8.73	0.09	14.25			99.53
Schindlbeck et al. (2018)	IODP 350, site 1436A	350-U1436A-6H-3-77-79	350-U1436A-6H-3-77-79-7	Izu volcanic arc	32.398	140.365	glass shard	39.07	0.528428	55.43	1.87	0.2487	11.83	0.9692	3.66	9.66	0.2116	15.58	0.0816		99.5411
Bryant et al. (2003)	ODP Leg 126, site 782A	782A-1H-3-22-24	782A-1H-3-22-24-1A	Izu volcanic arc	30.861	141.314	glass shard	3.2	0.25	54.45	2.44	0.33	15.14	1.11	4.05	8.91	0.22	13.35			99.55				23	7.4	56	5.3	171	22.9	34	0.441	0.37	68	2.47	6.47	1.17	6.43	2.28	0.95	3.04		3.73		2.53		2.42		1.16
Bryant et al. (2003)	ODP Leg 126, site 782A	782A-20X-CC-9-11	782A-20X-CC-9-11-16A	Izu volcanic arc	30.861	141.314	glass shard	184.1	6.1	55.54	1.87	0.26	12.85	0.82	4.45	9.38	0.16	14.67			99.55
Bryant et al. (2003)	ODP Leg 126, site 782A	782A-6H-1-138-140	782A-6H-1-138-140-3A	Izu volcanic arc	30.861	141.314	glass shard	49.2	1.8	54.68	2.64	0.33	13.26	1.02	4.38	9.3	0.14	14.24			99.57
Bryant et al. (2003)	ODP Leg 126, site 782A	782A-6H-1-138-140	782A-6H-1-138-140-3A	Izu volcanic arc	30.861	141.314	glass shard	49.2	1.8	54.25	2.6	0.34	13.17	1.01	4.55	9.52	0.16	14.4			99.58						50	4.6	153	21.7	35.7	0.363	0.35	65	1.89	5.65	1.06	5.68	2.04	0.91	2.85		3.77		2.33		2.28		1.22
Bryant et al. (2003)	ODP Leg 125, Site 786A	786A-5X-1-74-76	786A-5X-1-74-76-2C	Izu volcanic arc	31.88	141.23	glass shard	38.9	5.6	53.64	2.38	0.16	13.9	1.14	4.28	9.63	0.13	14.73			99.58
Kutterholf et al. (2018)	IODP 352, site U1441A	352-U1441A-3R-5-41-43	352-U1441A-3R-5_41-43 average	Izu volcanic arc	28.43	142.73	glass shard	21.13	3.477	54.6544	2.32631	0.330263	11.9986	0.833751	5.01213	9.89011	0.218363	14.6798	0.0562249		99.5833					5.62333	55.39	4.18	172.267	18.6933	30.4133	0.275667	0.451667	52.9133	1.42567	4.32667	0.763	4.46	1.95333	0.682	2.07333	0.461667	3.10667	0.752333	2.14	0.289333	2.15333	0.301667	1.15667
Kutterholf et al. (2018)	IODP 352, site U1442A	352-U1442A-3R-1-57-59	352-U1442A-3R-1_57-59 average	Izu volcanic arc	28.41	142.62	glass shard	14.19	1.6951	54.4082	2.66287	0.352647	13.0587	1.00928	4.78091	9.4797	0.239544	13.9376	0.0705976		99.5886					8.17333	54.2733	4.85333	164.297	22.5267	35.57	0.451333	0.401	85.3367	1.66433	5.30667	0.987667	5.78	2.28667	0.931667	3.15667	0.545	4.15667	0.934667	2.57	0.398	2.78333	0.434	1.31
Straub and Layne (2003)	ODP Leg 126, site 782A	782A-39X-1-21-23	782A-39X-1-21-23	Izu volcanic arc	30.861	141.314	glass shard		29.61	51.6	1.94	0.31	13.74	1.27	5.36	9.93	0.22	15.1	0.12		99.59	1.9	143	791	21.3	6.2
Straub (2003)	ODP Leg 126, site 782A	782A-39X-1-21-23	782A-39X-1-21-23-8	Izu volcanic arc	30.861	141.314	glass shards from tephra		29.61	51.6	1.94	0.31	13.74	1.27	5.36	9.93	0.22	15.1	0.12		99.59	1.9	143	791	21.3	6.2
Straub and Layne (2003)	ODP Leg 126, site 782A	782A-39X-1-21-23	782A-39-X-1-21-23	Izu volcanic arc	30.861	141.314	glass shards from tephra		29.61	51.6	1.94	0.31	13.74	1.27	5.36	9.93	0.22	15.1	0.12		99.59	0.5	143	791	21.3	6.2
Barnes et al. (2010)	ODP Leg 126, site 782A	782A-39X-1-21-23	782A-39X-1-21-23	Izu volcanic arc	30.861	141.314	glass shards from tephra		33.257	51.6	1.94	0.32	13.74	1.27	5.36	9.93	0.22	15.1	0.12		99.6			791
Bryant et al. (2003)	ODP Leg 125, Site 786A	786A-6X-5-7-9	786A-6X-5-7-9-4C	Izu volcanic arc	30.861	141.314	glass shard	53.7	10.8	53.81	2.41	0.33	12.68	1.12	5.04	9.73	0.12	14.75			99.63				26	6.9	53	4.5	164	24.9	45.9	0.196	0.62	82	1.44	4.96	1	5.74	2.23	0.87	3.23		4.05		2.62		2.7		1.51
Bryant et al. (2003)	ODP Leg 126, site 782A	782A-20X-CC-9-11	782A-20X-CC-9-11-16A	Izu volcanic arc	30.861	141.314	glass shard	184.1	6.1	55.92	2.36	0.3	13.55	1.04	3.86	8.76	0.09	14.12			99.66				25	7.1	45	3.4	176	18.8	27.4	0.219	0.42	54	1.19	3.49	0.67	4.01	1.61	0.67	2.27		3.07		1.9		2.08		0.87
Bryant et al. (2003)	ODP Leg 126, site 782A	782A-6H-1-138-140	782A-6H-1-138-140-3A	Izu volcanic arc	30.861	141.314	glass shard	49.2	1.8	54.35	2.58	0.35	13.25	0.99	4.53	9.57	0.12	14.27			99.67
Bryant et al. (2003)	ODP Leg 125, Site 786A	786A-6X-5-7-9	786A-6X-5-7-9-4C	Izu volcanic arc	30.861	141.314	glass shard	53.7	10.8	54.04	2.44	0.3	13.62	1.17	4.5	9.46	0.2	14.26			99.67
Bryant et al. (2003)	ODP Leg 126, site 782A	782A-20X-CC-9-11	782A-20X-CC-9-11-16A	Izu volcanic arc	30.861	141.314	glass shard	184.1	6.1	55.75	2.67	0.33	13.39	0.95	3.87	8.76	0.16	14.13			99.7
Bryant et al. (2003)	ODP Leg 126, site 782A	782A-6H-1-138-140	782A-6H-1-138-140-3A	Izu volcanic arc	30.861	141.314	glass shard	49.2	1.8	54.38	2.48	0.41	14.46	1.16	4.07	9.34	0.1	13.6			99.74
Bryant et al. (2003)	ODP Leg 126, site 782A	782A-20X-CC-9-11	782A-20X-CC-9-11-16A	Izu volcanic arc	30.861	141.314	glass shard	184.1	6.1	55.16	2.42	0.29	12.61	0.92	4.1	9.25	0.15	15.09			99.76
Bryant et al. (2003)	ODP Leg 126, site 782A	782A-20X-CC-9-11	782A-20X-CC-9-11-16A	Izu volcanic arc	30.861	141.314	glass shard	184.1	6.1	56.06	2.38	0.27	13.34	1.01	3.83	8.75	0.12	14.24			99.77
Schindlbeck et al. (2018)	IODP 350, site 1436A	350-U1436A-2H-1-25-27	350-U1436A-2H-1-25-27-13	Izu volcanic arc	32.398	140.365	glass shard	4.55	0.088	54.65	1.82	0.165	13.93	1.078	6.12	8.38	0.2361	13.37	0.042		99.7911
Bryant et al. (2003)	ODP Leg 126, site 782A	782A-1H-3-22-24	782A-1H-3-22-24-1A	Izu volcanic arc	30.861	141.314	glass shard	3.2	0.25	52.91	1.77	0.28	14.22	1.02	5.43	10.95	0.23	13.18			99.8
Bryant et al. (2003)	ODP Leg 126, site 782A	782A-1H-3-22-24	782A-1H-3-22-24-1A	Izu volcanic arc	30.861	141.314	glass shard	3.2	0.25	53.6	1.91	0.29	14.22	1.01	5.08	10.25	0.12	13.52			99.8
Bryant et al. (2003)	ODP Leg 126, site 782A	782A-20X-CC-9-11	782A-20X-CC-9-11-16A	Izu volcanic arc	30.861	141.314	glass shard	184.1	6.1	56.11	2.42	0.31	13.51	1	3.73	8.74	0.05	14.12			99.81
Schindlbeck et al. (2018)	IODP 350, site 1436A	350-U1436A-9H-4-75-77	350-U1436A-9H-4-75-77-1	Izu volcanic arc	32.398	140.365	glass shard	56.64	0.815803	54.23	2.77	0.2902	11.22	0.9966	5.52	9.66	0.2493	14.82	0.0695		99.8256
Bryant et al. (2003)	ODP Leg 126, site 782A	782A-20X-CC-9-11	782A-20X-CC-9-11-16A	Izu volcanic arc	30.861	141.314	glass shard	184.1	6.1	56.1	2.66	0.33	13.12	1.05	3.77	8.58	0.18	14.21			99.83				23	7.7	49	3.8	172	20.8	29.7	0.244	0.45	60	1.27	4.03	0.74	4.53	1.88	0.77	2.49		3.25		2.11		2.15		1
Bryant et al. (2003)	ODP Leg 125, Site 786A	786A-5X-1-74-76	786A-5X-1-74-76-2C	Izu volcanic arc	31.88	141.23	glass shard	38.9	5.6	54.1	2.7	0.23	13.49	1.21	4.01	9.25	0.18	14.84			99.83
Schindlbeck et al. (2018)	IODP 350, site 1436A	350-U1436A-4H-5-39-41	350-U1436A-4H-5-39-41-3	Izu volcanic arc	32.398	140.365	glass shard	23.19	0.334935	55.79	2.89	0.2355	12.52	1.0885	3.57	8.47	0.276	14.92	0.0878		99.8478					7.5	44.72	2.97	160.34	23.66	38.07	0.334	0.367	111.12	1.578	5.2	0.983	5.68	2.54	1.021	3.5	0.624	4.11	0.879	2.58	0.378	2.75	0.453	1.4
Bryant et al. (2003)	ODP Leg 126, site 782A	782A-20X-CC-9-11	782A-20X-CC-9-11-16A	Izu volcanic arc	30.861	141.314	glass shard	184.1	6.1	55.38	2.44	0.29	13.41	0.94	3.93	9.21	0.19	14.21			99.85
Bryant et al. (2003)	ODP Leg 126, site 782A	782A-20X-CC-9-11	782A-20X-CC-9-11-16A	Izu volcanic arc	30.861	141.314	glass shard	184.1	6.1	55.64	2.21	0.31	13.45	0.96	4.13	9.22	0.08	14			99.88
Bryant et al. (2003)	ODP Leg 125, Site 786A	786A-5X-1-74-76	786A-5X-1-74-76-2C	Izu volcanic arc	31.88	141.23	glass shard	38.9	5.6	53.38	2.97	0.25	13.35	1.04	4.28	9.58	0.22	14.94			99.88
Schindlbeck et al. (2018)	IODP 350, site 1436A	350-U1436A-9H-4-75-77	350-U1436A-9H-4-75-77-15	Izu volcanic arc	32.398	140.365	glass shard	56.64	0.815803	53.07	2.65	0.3562	14.07	1.2327	4.72	9.3	0.2249	14.18	0.1028		99.9066
Bryant et al. (2003)	ODP Leg 126, site 782A	782A-20X-CC-9-11	782A-20X-CC-9-11-16A	Izu volcanic arc	30.861	141.314	glass shard	184.1	6.1	55.82	2.44	0.32	13.47	1.05	3.77	8.79	0.15	14.2			99.91
Schindlbeck et al. (2018)	IODP 350, site 1436A	350-U1436A-5H-2-137-139	350-U1436A-5H-2-137-139-13	Izu volcanic arc	32.398	140.365	glass shard	28.7	0.402073	53.29	2.28	0.2892	14.56	1.2708	5.86	9.19	0.3517	12.74	0.0838		99.9155
Schindlbeck et al. (2018)	IODP 350, site 1436A	350-U1436A-12F-2-10-12	350-U1436A-12F-2-10-12 AV2	Izu volcanic arc	32.398	140.365	glass shard	64.4	0.942966	54.3746	2.59247	0.258323	12.4583	1.12226	4.77753	9.56977	0.185882	14.5811	0.0796803		100					6.14	44.39	3.2	183.5	21.15	38.04	0.264	0.48	70.7	1.664	5	0.872	5.42	1.73	0.739	2.54	0.446	3.67	0.787	2.41	0.316	2.74	0.401	1.18
Schindlbeck et al. (2018)	IODP 350, site 1436A	350-U1436A-1H-2-91-93	350-U1436A-1H-2-91-93 AV1	Izu volcanic arc	32.398	140.365	glass shard	2.41	0.0438292	53.3703	2.25315	0.251624	13.7186	1.02354	5.18924	10.1146	0.249476	13.7579	0.0715115		100
Schindlbeck et al. (2018)	IODP 350, site 1436A	350-U1436A-2H-1-25-27	350-U1436A-2H-1-25-27 AV2	Izu volcanic arc	32.398	140.365	glass shard	4.55	0.088	53.0481	1.85904	0.171854	14.181	1.01914	6.80981	9.64432	0.246884	12.9708	0.0488864		100					3.995	46.46	4.28	128.555	24.4	44.79	0.4215	0.489	102.975	2.0425	6.185	1.175	6.39	2.51	0.827	3.095	0.5655	4.145	0.914	2.635	0.391	2.665	0.349	1.34
Schindlbeck et al. (2018)	IODP 350, site 1436A	350-U1436A-3H-2-25-27	350-U1436A-3H-2-25-27 AV	Izu volcanic arc	32.398	140.365	glass shard	12.95	0.207005	56.2166	2.88394	0.352678	13.3329	1.38749	3.52676	8.29687	0.259946	13.6292	0.113529		100					7.38333	47.3767	4.47333	175.527	33.0733	55.3033	0.499667	0.525	119.473	2.55667	7.66667	1.381	8.48	3.43333	1.26433	4.49	0.831	5.70333	1.24167	3.81	0.51	3.71	0.538333	1.65
Schindlbeck et al. (2018)	IODP 350, site 1436A	350-U1436A-4H-4-63-65	350-U1436A-4H-4-63-65 AV	Izu volcanic arc	32.398	140.365	glass shard	21.93	0.319582	55.4045	2.73408	0.268476	12.6814	1.20588	3.90679	8.92909	0.26501	14.5142	0.0904851		100
Schindlbeck et al. (2018)	IODP 350, site 1436A	350-U1436A-4H-5-105-107	350-U1436A-4H-5-105-107 AV2	Izu volcanic arc	32.398	140.365	glass shard		0.0523716	56.7589	2.88206	0.230677	11.8766	1.07836	3.48923	8.54368	0.230225	14.8407	0.0694823		100					7.225	46.625	2.84	161.01	24.765	38.955	0.2545	0.3885	106.845	1.604	4.985	0.974	5.965	2.6	0.9405	3.31	0.5995	4.355	1.019	2.775	0.364	2.85	0.4625	1.28
Schindlbeck et al. (2018)	IODP 350, site 1436A	350-U1436A-4H-5-39-41	350-U1436A-4H-5-39-41 AV	Izu volcanic arc	32.398	140.365	glass shard	23.19	0.334935	55.7617	2.89973	0.238596	12.4555	1.12052	3.5969	8.65174	0.254022	14.9478	0.0734315		100					7.49	45.8633	3.15	161.283	24.01	38.8133	0.396667	0.429	111.24	1.58333	5.18	1.01933	5.84333	2.25	0.937333	3.10667	0.609	4.32667	0.964667	2.68333	0.417333	2.85333	0.495	1.50333
Schindlbeck et al. (2018)	IODP 350, site 1436A	350-U1436A-5H-2-137-139	350-U1436A-5H-2-137-139 AV1	Izu volcanic arc	32.398	140.365	glass shard	28.7	0.402073	53.4744	2.40166	0.282262	14.0488	1.22936	5.05819	9.45798	0.26787	13.6991	0.0803747		100					8.38	49.45	4.29	168.94	28.7	51.52	0.406	0.723	145.21	1.94	6.97	1.355	7.13	2.78	1.03	3.31	0.744	5.36	0.939	3.29	0.455	3.11	0.49	1.57
Schindlbeck et al. (2018)	IODP 350, site 1436A	350-U1436A-5H-5-132-134	350-U1436A-5H-5-132-134 AV2	Izu volcanic arc	32.398	140.365	glass shard	33.08	0.455442	52.4273	1.94076	0.263538	13.7427	1.03258	5.85563	11.1449	0.240937	13.287	0.0645885		100					15.515	64.635	6.86	258.455	51.92	89.045	0.6945	1.0195	209.655	3.645	11.48	2.071	12.895	4.875	1.945	7.145	1.337	8.695	1.981	5.975	0.891	6.12	0.9	3.17
Schindlbeck et al. (2018)	IODP 350, site 1436A	350-U1436A-5H-6-6-8	350-U1436A-5H-6-6-8 AV	Izu volcanic arc	32.398	140.365	glass shard	33.32	0.458366	52.4551	2.59073	0.364701	14.7912	1.41076	5.01763	9.68075	0.260473	13.3046	0.123968		100
Schindlbeck et al. (2018)	IODP 350, site 1436A	350-U1436A-6H-2-5	350-U1436A-6H-2-5-7 AV1	Izu volcanic arc	32.398	140.365	glass shard	36.85	0.501378	53.2851	2.16913	0.232546	13.5872	1.04418	5.05738	10.2704	0.285691	14.0184	0.0499505		100
Schindlbeck et al. (2018)	IODP 350, site 1436A	350-U1436A-6H-3-77-79	350-U1436A-6H-3-77-79 AV	Izu volcanic arc	32.398	140.365	glass shard	39.07	0.528428	55.5455	2.03555	0.287506	13.007	1.08727	3.74236	9.35472	0.229868	14.659	0.0511275		100
Schindlbeck et al. (2018)	IODP 350, site 1436A	350-U1436A-7H-3-93-95	350-U1436A-7H-3-93-95 AV2	Izu volcanic arc	32.398	140.365	glass shard	47.04	0.658487	54.6997	2.83488	0.297815	13.565	1.29174	4.93751	8.8211	0.237798	13.1899	0.12447		100					7.99	61.61	5.58	181.87	23.14	54.31	0.499	0.579	113.89	3.47	9.39	1.472	7.73	3.05	0.858	3.5	0.492	4.24	0.917	3.1	0.422	2.9	0.445	1.7
Schindlbeck et al. (2018)	IODP 350, site 1436A	350-U1436A-7H-4-125-127	350-U1436A-7H-4-125-127 AV1	Izu volcanic arc	32.398	140.365	glass shard	48.86	0.688311	56.1047	2.98442	0.336012	12.397	1.11428	3.66688	8.51529	0.21733	14.5558	0.108178		100					7.33667	40.97	3.84	140.287	26.56	47.48	0.395	0.499	90.71	2.075	6.07	1.15433	6.43667	2.52667	0.935	3.67667	0.648	4.47	0.992667	2.91667	0.376667	2.94333	0.445667	1.47
Schindlbeck et al. (2018)	IODP 350, site 1436A	350-U1436A-7H-4-16-18	350-U1436A-7H-4-16-18 AV	Izu volcanic arc	32.398	140.365	glass shard	47.77	0.67045	56.915	3.15915	0.341887	11.8433	1.19915	3.4535	8.19424	0.231507	14.5591	0.103132		100					12.3333	51.3533	9.08667	169.953	27.66	60.86	0.881	0.77	102.11	2.25833	6.95667	1.31767	7.61667	2.93	1.08033	3.68	0.667	5.12	1.03133	3.14667	0.391667	3.00667	0.412	2.01667
Schindlbeck et al. (2018)	IODP 350, site 1436A	350-U1436A-7H-4-38-40	350-U1436A-7H-4-38-40 AV	Izu volcanic arc	32.398	140.365	glass shard	47.99	0.674055	55.7231	2.9793	0.316972	12.5454	1.13682	3.90414	8.61249	0.212793	14.4697	0.0993002		100					9.01	44.29	4.08667	145.167	28.84	52.0933	0.432	0.590667	99.6567	2.116	6.62667	1.26467	7.06667	2.99	1.09867	3.87	0.693333	4.96667	1.05433	3.23	0.454667	3.38667	0.531333	1.67
Schindlbeck et al. (2018)	IODP 350, site 1436A	350-U1436A-8H-1-5-7	350-U1436A-8H-1-5-7 AV	Izu volcanic arc	32.398	140.365	glass shard	50.45	0.714367	55.2416	2.91066	0.302895	12.5099	1.14103	4.12939	8.7658	0.213639	14.6977	0.08726		100
Schindlbeck et al. (2018)	IODP 350, site 1436A	350-U1436A-8H-2-90-92	350-U1436A-8H-2-90-92 AV	Izu volcanic arc	32.398	140.365	glass shard	52.48	0.747632	55.3676	2.7488	0.308783	12.9566	1.18123	3.94876	8.71895	0.211138	14.4839	0.0741001		100
Schindlbeck et al. (2018)	IODP 350, site 1436A	350-U1436A-8H-3-58-60	350-U1436A-8H-3-58-60 AV	Izu volcanic arc	32.398	140.365	glass shard	53.56	0.765331	54.8782	2.85241	0.307835	13.1087	1.16626	4.03374	8.77724	0.220261	14.5682	0.0871034		100
Schindlbeck et al. (2018)	IODP 350, site 1436A	350-U1436A-9H-2-78-80	350-U1436A-9H-2-78-80 AV	Izu volcanic arc	32.398	140.365	glass shard	56.32	0.810559	54.2112	2.65632	0.302122	13.032	1.21616	4.74911	9.37778	0.215713	14.144	0.0955708		100					13.71	52.16	4.48	145.275	25.585	46.135	0.4105	0.4975	91.245	1.989	6.405	1.2055	6.49	2.7	1.0055	3.395	0.598	4.165	0.921	2.88	0.439	3.08	0.498	1.415
Schindlbeck et al. (2018)	IODP 350, site 1436A	350-U1436A-9H-2-95-97	350-U1436A-9H-2-95-97 AV2	Izu volcanic arc	32.398	140.365	glass shard	56.49	0.813345	54.1912	2.63982	0.334216	13.4839	1.29124	4.6727	9.3296	0.188283	13.7729	0.0960382		100					8.07333	46.52	4.21333	139.42	23.76	44.01	0.367667	0.532667	85.8167	1.92433	6.19667	1.12967	6.38667	2.58	0.932333	3.38667	0.632333	4.28667	0.910333	2.69667	0.383333	2.68333	0.402667	1.67333
Schindlbeck et al. (2018)	IODP 350, site 1436A	350-U1436A-9H-3-38-40	350-U1436A-9H-3-38-40 AV2	Izu volcanic arc	32.398	140.365	glass shard	56.93	0.820555	53.9133	2.64094	0.328721	12.8833	1.16384	4.84538	9.66488	0.215595	14.2604	0.0836208		100
Schindlbeck et al. (2018)	IODP 350, site 1436A	350-U1436A-9H-3-50-52-9H-4-120-122	350-U1436A-9H-3-50-52-9H-4-120-122 AV2	Izu volcanic arc	32.398	140.365	glass shard	57.94	0.837106	54.0228	2.65486	0.35372	13.1941	1.17582	4.66626	9.38666	0.230554	14.224	0.0911179		100					5.44625	32.2501	2.92313	98.4093	16.5544	30.8153	0.280227	0.371158	60.3846	1.3176	4.35973	0.797843	4.58431	1.7091	0.675017	2.14053	0.40879	2.71998	0.646841	1.86568	0.28372	2.02106	0.282498	0.98577
Schindlbeck et al. (2018)	IODP 350, site 1436A	350-U1436A-9H-3-9	350-U1436A-9H-3-9-11 AV1	Izu volcanic arc	32.398	140.365	glass shard	56.64	0.815803	53.5579	2.61484	0.30886	13.1395	1.19824	5.02079	9.75988	0.21974	14.1091	0.0711372		100
Straub et al. (2010)	ODP Leg 126, site 782A	782A-15X-3-9-10	782A-15X-3-9-10	Izu volcanic arc	30.861	141.314	glassy scoria		3.78006	52.2	2.29	0.38	14.86	1.26	4.6	9.35	0.22	14.75	0.11		100					6.17966	51.9397	3.72039	176.204	21.6693	33.2709	0.282037	0.396834	52.9757	1.38235	4.2615	0.812592	4.55289	1.84311	0.754687	2.79279	0.507533	3.49747	0.776051	2.26151		2.28977	0.358819	1.09381
Straub et al. (2010)	ODP Leg 126, site 782A	782A-19X-2-24-26	782A-19X-2-24-26	Izu volcanic arc	30.861	141.314	scoria		6.03082	53.62	2.15	0.24	12.08	0.73	5.81	10.17	0.23	14.89	0.09		100					5.74488	48.8664	3.12848	183.704	18.33	29.5456	0.284784	0.351387	55.3794	1.11625	3.40279	0.656531	3.63307	1.49514	0.590614	2.2715	0.419032	2.8921	0.64838	1.91414		1.96734	0.310015	0.976565
Straub et al. (2010)	ODP Leg 126, site 782A	782A-21X2-84-86	782A-21X2-84-86	Izu volcanic arc	30.861	141.314	scoria		7.22719	54.9	2.56	0.34	11.86	0.86	4.85	9.5	0.22	14.8	0.11		100					8.24261	46.5739	4.41676	189.648	23.7779	33.5415	0.215443	0.539049	74.6392	1.45246	4.42637	0.832163	5.09232	2.04299	0.75245	2.7641	0.538422	3.72349	0.82307	2.45755		2.46197	0.372466	1.31651
Straub et al. (2010)	ODP Leg 126, site 782A	782A-21X3-0-2	782A-21X3-0-2	Izu volcanic arc	30.861	141.314	scoria		7.26707	56.61	2.81	0.44	12.76	1.14	4.08	8.11	0.25	13.66	0.14		100					12.4182	28.3457	7.14236	170.671	35.3191	68.4946	1.7525	0.686285	144.619	3.06293	8.82494	1.57598	8.95577	3.20257	1.05522	4.20644	0.79538	5.50253	1.21941	3.65867		3.76312	0.570552	2.26642
Straub et al. (2010); Straub et al. (2004)	ODP Leg 126, site 782A	782A-23X-4-107-109	782A-23X-4-107-109	Izu volcanic arc	30.861	141.314	glassy scoria		8.59456	52.12	2.2	0.34	15.19	1.22	4.95	9.53	0.25	14.11	0.1		100					7.04091		4.70632	179.133	22.9762	34.7244	0.308534	0.478082	71.3897	1.73218	4.95646	0.918869	5.45291	2.04274	0.787826	3.19492	0.541789	3.92192	0.848449	2.55585		2.60218	0.398319	1.25984
Straub et al. (2010)	ODP Leg 126, site 782A	782A-33X-5-36-39	782A-33X-5-36-39	Izu volcanic arc	30.861	141.314	glassy scoria		14.2012	54.08	2.68	0.54	13.69	1.09	3.86	8.65	0.22	15.04	0.15		100					6.40193	45.1609	7.16744	242.437	24.5152	41.9644	0.327414	0.611861	114.519	2.56437	6.9127	1.22799	6.4062	2.37027	0.874293	3.25064	0.580352	3.90324	0.864798	2.53904		2.59394	0.406116	1.34294
Straub et al. (2010)	ODP Leg 126, site 782A	782A-39X-2-42-44	782A-39X-2-42-44	Izu volcanic arc	30.861	141.314	scoria		33.2571	54.93	2.5	0.43	12.55	0.93	3.96	9.15	0.22	15.26	0.07	0.28	100					9.08433	26.2749	15.2218	257.361	35.184	98.0768	1.15573	0.593616	176.817	6.30848	15.599	2.56306	12.2971	3.95554	1.28818	4.95882	0.84715	5.52115	1.21015	3.53026		3.6216	0.571964	2.69816
Straub et al. (2010)	ODP Leg 126, site 782A	782A-41X-5-99-100	782A-41X-5-99-100	Izu volcanic arc	30.861	141.314	dark pumice		40.36	56.56	2.26	0.35	11.85	0.79	4.15	8.68	0.18	15.13	0.06	1.3	100					10.3369	42.3571	7.19066	160.575	25.1438	48.1142	0.432215	0.332364	47.1396	2.12689	6.04838	1.12515	5.92704	2.26804	0.840246	3.23942	0.587385	3.9728	0.888608	2.58796		2.65796	0.418524	1.46035
Straub et al. (2010)	ODP Leg 126, site 782A	782A-IZB-27	782A-IZB-27	Izu volcanic arc	30.861	141.314	vesicular glass		3.52011	54.33	2.43	0.32	12.55	0.76	4.95	9.71	0.23	14.64	0.1		100					6.57173	36.1793	4.57177	181.886	22.7439	36.2966	0.328304	2.36698	74.872	1.95995	5.52449	0.9609	5.54515	2.05603	0.735217	2.73771	0.52094	3.54159	0.77352	2.30155		2.32893	0.347693	1.26433
Schindlbeck et al. (2018)	IODP 350, site 1436A	350-U1436A-5H-5-62-64	350-U1436A-5H-5-62-64-19	Izu volcanic arc	32.398	140.365	glass shard	33.08	0.455442	55.2	2.93	0.2441	15	1.5001	3.28	8.97	0.2567	12.53	0.1242		100.035
Bryant et al. (2003)	ODP Leg 126, site 782A	782A-20X-CC-9-11	782A-20X-CC-9-11-16A	Izu volcanic arc	30.861	141.314	glass shard	184.1	6.1	55.63	2.55	0.33	13.36	1.02	3.95	8.77	0.18	14.22			100.05
Schindlbeck et al. (2018)	IODP 350, site 1436A	350-U1436A-8H-2-90-92	350-U1436A-8H-2-90-92-6	Izu volcanic arc	32.398	140.365	glass shard	52.48	0.747632	53.73	2.66	0.2748	13.94	1.1623	4.7	9.3	0.2522	13.99	0.0425		100.052
Bryant et al. (2003)	ODP Leg 126, site 782A	782A-1H-3-22-24	782A-1H-3-22-24-1A	Izu volcanic arc	30.861	141.314	glass shard	3.2	0.25	55.27	2.23	0.27	13.95	1.06	4.3	9.62	0.19	13.12			100.06				26	5.2	50	4.9	162	22.5	37.1	0.365	0.35	72	2.23	5.89	1.09	5.85	2.36	0.88	3.08		3.77		2.48		2.4		1.33
Bryant et al. (2003)	ODP Leg 126, site 782A	782A-20X-CC-9-11	782A-20X-CC-9-11-16A	Izu volcanic arc	30.861	141.314	glass shard	184.1	6.1	55.75	2.52	0.31	13.3	1.03	3.73	8.88	0.17	14.3			100.12
Kutterholf et al. (2018)	IODP 352, site U1441A	352-U1441A-6R-3-18-20	352-U1441A-6R-3_18-20 average	Izu volcanic arc	28.43	142.73	glass shard	47.2	10.3318	52.1757	2.25162	0.299796	14.7277	1.34553	4.83424	9.78101	0.256927	14.2538	0.0736958		100.19					9.03	58.9867	5.45	168.207	28.34	43.5867	0.274	0.721333	90.6833	1.57233	5.54667	1.05933	6.45667	2.83333	1.042	3.60333	0.658	5.06333	1.06867	3.25333	0.480333	3.13	0.472	1.32
Bryant et al. (2003)	ODP Leg 126, site 782A	782A-1H-3-22-24	782A-1H-3-22-24-1A	Izu volcanic arc	30.861	141.314	glass shard	3.2	0.25	55.9	1.19	0.37	13.59	1.06	4.55	9.68	0.13	13.53			100.23
Schindlbeck et al. (2018)	IODP 350, site 1436A	350-U1436A-8H-3-58-60	350-U1436A-8H-3-58-60-1	Izu volcanic arc	32.398	140.365	glass shard	53.56	0.765331	53.64	2.75	0.2726	13.44	1.1698	4.89	9.5	0.1481	14.35	0.0749		100.235
Bryant et al. (2003)	ODP Leg 126, site 782A	782A-20X-CC-9-11	782A-20X-CC-9-11-16A	Izu volcanic arc	30.861	141.314	glass shard	184.1	6.1	55.64	2.5	0.31	13.52	0.95	3.83	8.78	0.17	14.3			100.28
Bryant et al. (2003)	ODP Leg 126, site 782A	782A-20X-CC-9-11	782A-20X-CC-9-11-16A	Izu volcanic arc	30.861	141.314	glass shard	184.1	6.1	55.99	2.26	0.29	13.53	1.05	3.86	8.66	0.16	14.22			100.34
Bryant et al. (2003)	ODP Leg 126, site 782A	782A-20X-CC-9-11	782A-20X-CC-9-11-16A	Izu volcanic arc	30.861	141.314	glass shard	184.1	6.1	56.11	2.52	0.29	13.31	0.97	3.89	8.66	0.09	14.17			100.42
Bryant et al. (2003)	ODP Leg 126, site 782A	782A-20X-CC-9-11	782A-20X-CC-9-11-16A	Izu volcanic arc	30.861	141.314	glass shard	184.1	6.1	55.71	2.7	0.34	13.19	1	3.79	8.76	0.17	14.33			100.5
Straub et al. (2010)	ODP Leg 126, site 782A	SOF1A	SOF1A	Izu volcanic arc	29.793	140.342	tephra							0.81					0.12							10.4	31.4	6.7	184	31.7	62	0.85	0.487	125	2.89	8.27	1.525	8.04	2.96	1.02	4.09	0.73	4.94	1.1	3.23		3.31	0.52	1.89
Straub et al. (2010)	ODP Leg 126, site 782A	SOF3A	SOF3A	Izu volcanic arc	29.793	140.342	tephra							0.545198					0.0776962							25.6721	23.1269	4.19451	59.3686	18.6853	44.1828	0.653633	1.0442	99.9967	2.06149	5.30311	0.922428	4.71603	1.65783	0.675901	2.36785	0.4194	2.85217	0.645853	1.91652		2.09571	0.336032	1.37789
Schindlbeck et al. (2018)	IODP 350, site 1436A	350-U1436A-2H-4-76-78	350-U1436A-2H-4-76-78-1	Izu volcanic arc	32.398	140.365	glass shard	4.55	0.088																	9.7	15.22	6.02	107.05	33.7	77.73	0.675	0.694	163.28	3.33	10.35	1.631	9.74	3.84	1.23	4.66	0.876	5.92	1.278	3.44	0.617	4.17	0.582	2.6
Schindlbeck et al. (2018)	IODP 350, site 1436A	350-U1436A-2H-4-76-78	350-U1436A-2H-4-76-78-2	Izu volcanic arc	32.398	140.365	glass shard	4.55	0.088																	10.18	27.46	6.64	202.77	31.35	65.81	0.766	0.652	147.94	3.64	10.34	1.756	9.87	3.56	1.251	4.49	0.845	5.38	1.197	3.61	0.552	3.74	0.522	2.2
Schindlbeck et al. (2018)	IODP 350, site 1436A	350-U1436A-2H-4-76-78	350-U1436A-2H-4-76-78-3	Izu volcanic arc	32.398	140.365	glass shard	4.55	0.088																	11.07	13.69	6.47	101.71	36.66	87.61	0.809	0.716	186.39	3.69	10.56	2.01	10.06	3.95	0.97	4.14	0.906	5.73	1.24	4.37	0.639	4.02	0.642	2.95
Schindlbeck et al. (2018)	IODP 350, site 1436A	350-U1436A-5H-6-62-64	350-U1436A-5H-6-62-64-1	Izu rear- arc?	32.398	140.365	glass shard	33.32	0.458366																	12.35	9.61	21.96	83.75	43.41	227.59	5.39	0.663	172.64	12.62	32.08	4.45	20.85	5.78	1.04	5.11	1	6.89	1.59	4.8	0.8	4.85	0.885	5.31
Schindlbeck et al. (2018)	IODP 350, site 1436A	350-U1436A-5H-6-62-64	350-U1436A-5H-6-62-64-2	Izu rear- arc?	32.398	140.365	glass shard	33.32	0.458366																	8.94	9.27	18.48	84.37	38.14	191.81	4.72	0.78	142.46	10.92	27.22	3.8	18.19	5.71	1.2	5.31	0.93	5.66	1.306	4.36	0.7	4.02	0.562	4.96
Straub et al. (2010)	ODP Leg 126, site 782A	782A-11X-1-55-57	782A-11X-1-55-57	Izu volcanic arc	30.861	141.314	tephra		2.789																	9.6163	42.2509	5.54869	162.268	24.3679	43.346	0.372714	0.435002	64.5595	1.96981	5.96232	1.05641	6.03717	2.28407	0.776927	2.93359	0.561655	3.8852	0.839076	2.52889	0.372361	2.53389	0.380776	1.47535
Straub et al. (2010)	ODP Leg 126, site 782A	782A-11X-3-0-1	782A-11X-3-0-1	Izu volcanic arc	30.861	141.314	tephra		2.842					0.853209					0.112099							6.42479	32.9689	3.38876	163.028	32.9143	61.2974	0.504728	0.279297	60.053	2.35091	7.40774	1.40113	7.61013	2.9795	1.08833	4.24624	0.771551	5.25786	1.16876	3.43783		3.5264	0.553763	1.94614
Straub et al. (2010)	ODP Leg 126, site 782A	782A-11X-3-0-1	782A-11X-3-0-1	Izu volcanic arc	30.861	141.314	tephra		2.842																	5.35175	39.1977	2.58803	185.856	26.8176	43.1098	0.336901	0.21669	45.434	1.91594	5.94776	1.05834	6.17151	2.44589	0.924919	3.2701	0.61941	4.24019	0.927328	2.7602	0.405797	2.78976	0.419286	1.44885
Straub (2003)	ODP Leg 126, site 782A	782A-11X-3-0-1	782A-11X-3-0-1-19	Izu volcanic arc	30.861	141.314	glass shards from tephra		2.84																			2.1	170	22	33.2	0.25	0.18	34	1.45	4.52	0.83	5.07	2.02	0.82	2.95	0.51	3.84	0.83	2.48	0.37	2.57	0.4	1.14
Straub et al. (2010)	ODP Leg 126, site 782A	782A-13X-3-51-53	782A-13X-3-51-53	Izu volcanic arc	30.861	141.314	tephra		3.262																	9.51973	39.6219	4.85469	176.582	24.9166	42.2157	0.349128	0.390003	66.7475	2.04012	6.04739	1.06746	6.31614	2.37319	0.841705	3.10365	0.57618	3.99972	0.87414	2.61103	0.382149	2.63168	0.389872	1.48838
Straub et al. (2010)	ODP Leg 126, site 782A	782A-14X-2-142-144	782A-14X-2-142-144	Izu volcanic arc	30.861	141.314	tephra		3.454																	11.5325	44.1887	5.26887	160.462	26.7667	43.6004	0.325541	0.470611	73.3167	1.93697	5.73962	1.06477	6.19668	2.36425	0.84657	3.18152	0.616118	4.30221	0.93924	2.81364	0.411916	2.90147	0.430924	1.58979
Straub et al. (2010)	ODP Leg 126, site 782A	782A-15X-3-116-118	782A-15X-3-116-118	Izu volcanic arc	30.861	141.314	tephra		3.845																	11.131	17.2296	9.68892	121.466	48.3075	106.743	0.938781	0.751818	217.086	4.33331	12.4743	2.25747	12.6642	4.46575	1.19013	5.72521	1.10975	7.41689	1.64796	5.01222	0.772491	5.26454	0.796758	3.79717
Straub et al. (2010)	ODP Leg 126, site 782A	782A-15X-3-9-10	782A-15X-3-9-10	Izu volcanic arc	30.861	141.314	tephra		3.845					1.13449					0.0670975							6.17966	51.9397	3.72039	176.204	21.6693	33.2709	0.282037	0.396834	52.9757	1.38235	4.2615	0.812592	4.55289	1.84311	0.754687	2.79279	0.507533	3.49747	0.776051	2.26151		2.28977	0.358819	1.09381
Straub (2003)	ODP Leg 126, site 782A	782A-15X-3-9-10	782A-15X-3-9-10	Izu volcanic arc	30.861	141.314	glass shards from tephra		3.78																			4.9	174	22.4	32.4	0.27	0.51	55	1.66	5.14	0.92	5.52	2.11	0.83	3.07	0.55	4.08	0.89	2.62	0.38	2.65	0.41	1.17
Straub et al. (2010)	ODP Leg 126, site 782A	782A-15X3-104-106	782A-15X3-104-106	Izu volcanic arc	30.861	141.314	tephra		3.78																	11.3983	16.2282	9.2194	100.218	50.0626	109.267	0.809057	0.671128	185.341	4.1162	12.439	2.32242	13.0771	4.5788	1.24263	5.978	1.14031	7.72514	1.71405	5.20883	0.78768	5.40061	0.813328	3.88556
Straub et al. (2010)	ODP Leg 126, site 782A	782A-17X4-0-2	782A-17X4-0-2	Izu volcanic arc	30.861	141.314	tephra		5.031																	10.07	40.8767	4.21478	176.018	29.5654	47.1565	0.54961	0.377661	66.6634	2.30695	6.68019	1.24322	7.46788	2.72509	1.02251	3.65015	0.689642	4.75839	1.0478	3.1413	0.456518	3.12794	0.461067	1.69483
Straub et al. (2010)	ODP Leg 126, site 782A	782A-18X1-15-17	782A-18X1-15-17	Izu volcanic arc	30.861	141.314	tephra		5.349																	10.6516	44.1894	4.50767	175.29	25.8351	38.3161	0.349128	0.406909	73.8152	2.01062	5.62926	1.04616	5.95622	2.26877	0.857815	2.98434	0.587357	4.00213	0.876078	2.67177	0.397809	2.71628	0.406455	1.41076
Straub et al. (2010)	ODP Leg 126, site 782A	782A-19X-2-24-26	782A-19X-2-24-26	Izu volcanic arc	30.861	141.314	tephra		6.031					0.727357					0.0454387							5.74488	48.8664	3.12848	183.704	18.33	29.5456	0.284784	0.351387	55.3794	1.11625	3.40279	0.656531	3.63307	1.49514	0.590614	2.2715	0.419032	2.8921	0.64838	1.91414		1.96734	0.310015	0.976565
Straub et al. (2010)	ODP Leg 126, site 782A	782A-19X-2-24-26	782A-19X-2-24-26	Izu volcanic arc	30.861	141.314	tephra		6.031																	6.89058	48.3498	3.44928	187.485	20.1124	29.3036	0.266108	0.382317	56.4034	1.31507	3.89027	0.69968	4.23964	1.67437	0.614103	2.25052	0.448126	3.13459	0.698442	2.09017	0.304027	2.09031	0.311188	1.05588
Straub et al. (2010)	ODP Leg 126, site 782A	782A-19X-3-68-70	782A-19X-3-68-70	Izu volcanic arc	30.861	141.314	tephra		6.031					0.456141					0.0786677							11.0937	13.42	15.1852	104.007	49.9671	159.404	1.25948	1.42717	304.734	5.10048	15.2389	2.66764	13.2951	4.66046	1.01322	6.1535	1.09838	7.42115	1.67115	5.02384		5.3657	0.840131	4.92466
Straub et al. (2010)	ODP Leg 126, site 782A	782A-19X3-68-70	782A-19X3-68-70	Izu volcanic arc	30.861	141.314	tephra		6.031																	14.4508	12.4566	15.7831	105.11	49.0807	151.753	1.16285	1.4085	301.426	5.11291	14.8995	2.58107	13.9886	4.64302	0.992432	5.80195	1.07062	7.32838	1.5965	4.9727	0.758513	5.2277	0.777797	5.1629
Straub et al. (2010)	ODP Leg 126, site 782A	782A-21X2-84-86	782A-21X2-84-86	Izu volcanic arc	30.861	141.314	tephra		7.474																	8.24261	46.5739	4.41676	189.648	23.7779	33.5415	0.215443	0.539049	74.6392	1.45246	4.42637	0.832163	5.09232	2.04299	0.75245	2.7641	0.538422	3.72349	0.82307	2.45755	0.364724	2.46197	0.372466	1.31651
Straub et al. (2010)	ODP Leg 126, site 782A	782A-21X3-0-2	782A-21X3-0-2	Izu volcanic arc	30.861	141.314	tephra		7.474																	12.4182	28.3457	7.14236	170.671	35.3191	68.4946	1.7525	0.686285	144.619	3.06293	8.82494	1.57598	8.95577	3.20257	1.05522	4.20644	0.79538	5.50253	1.21941	3.65867	0.541387	3.76312	0.570552	2.26642
Straub (2003)	ODP Leg 126, site 782A	782A-23X-4-107-109	782A-23X-4-107-109	Izu volcanic arc	30.861	141.314	glass shards from tephra		8.59																			4.7	179	23	34.7	0.31	0.48	71	1.73	4.96	0.92	5.45	2.04	0.79	3.19	0.54	3.92	0.85	2.56	0.39	2.6	0.4	1.26
Straub et al. (2010)	ODP Leg 126, site 782A	782A-25X-4-111-113	782A-25X4-111-113	Izu volcanic arc	30.861	141.314	tephra		9.757																	8.06365	12.2825	11.7018	95.1423	45.4037	122.426	2.12988	0.971954	191.995	4.66894	13.6374	2.36111	12.5092	4.02146	1.00648	5.19164	0.98969	6.79862	1.50924	4.58307	0.687315	4.93893	0.734019	3.96977
Straub et al. (2010)	ODP Leg 126, site 782A	782A-26X-4-52-54	782A-26X-4-52-54	Izu volcanic arc	30.861	141.314	tephra		10.45					0.618188					0.157412							7.93606	20.1673	7.04307	176.48	46.3925	98.2255	0.721333	0.535159	135.919	3.79904	11.7476	2.16445	11.4219	4.25955	1.3619	5.91135	1.05691	7.13086	1.5895	4.71839		4.9156	0.770315	3.04152
Straub (2003)	ODP Leg 126, site 782A	782A-26X-4-52-54	782A-26X-4-52-54	Izu volcanic arc	30.861	141.314	glass shards from tephra		10.3																			8	161	43.8	92.5	0.69	0.6	132	4	12.11	2.11	12.06	4.36	1.35	5.66	1.02	7.54	1.64	4.99	0.77	5.36	0.84	3.17
Straub (2003)	ODP Leg 126, site 782A	782A-26X-5-147-149	782A-26X-5-147-149	Izu volcanic arc	30.861	141.314	glass shards from tephra		10.45																			5.7	206	29.6	57.1	0.49	0.46	80	2.49	7.9	1.36	7.77	2.87	1.04	4.05	0.71	4.96	1.15	3.4	0.5	3.41	0.53	1.79
Straub et al. (2010)	ODP Leg 126, site 782A	782A-26X4-52-54	782A-26X4-52-54	Izu volcanic arc	30.861	141.314	tephra		10.45																	10.4342	17.1903	8.27012	154.556	48.3017	103.9	1.38692	0.604578	154.658	4.27303	12.6563	2.2371	12.7884	4.42559	1.35075	5.70835	1.08177	7.38551	1.64553	4.91298	0.751415	5.0371	0.7729	3.56872
Straub et al. (2010)	ODP Leg 126, site 782A	782A-27X2-30-32	782A-27X2-30-32	Izu volcanic arc	30.861	141.314	tephra		10.693																	4.80633	11.3225	8.4793	126.233	44.3901	97.4677	0.962367	0.658033	132.283	3.85525	11.6343	2.11866	11.8704	4.00408	1.19985	5.21389	1.00287	6.8869	1.52918	4.64568	0.700189	4.9135	0.74143	3.27653
Straub et al. (2010)	ODP Leg 126, site 782A	782A-28X-4-128-130	782A-28X-4-128-130	Izu rear- arc?	30.861	141.314	tephra		11.223					0.343179					0.0459815							8.25337	13.4221	19.6443	94.0683	37.9928	138.431	1.11003	1.69383	207.178	4.97247	13.458	2.25208	10.6255	3.5406	0.727162	4.6061	0.825145	5.54678	1.25646	3.79382		4.07485	0.64202	4.03158
Straub et al. (2010)	ODP Leg 126, site 782A	782A-28X1-97-99	782A-28X1-97-99	Izu volcanic arc	30.861	141.314	tephra		11.223																	7.17363	31.3098	5.88115	187.766	22.1733	41.4967	0.573196	0.493103	86.3583	2.01207	5.60558	0.990905	5.46457	1.95963	0.717221	2.52443	0.484532	3.36466	0.736835	2.23657	0.329222	2.30577	0.349004	1.3901
Straub et al. (2010)	ODP Leg 126, site 782A	782A-28X4-128-130	782A-28X4-128-130	Izu rear- arc?	30.861	141.314	tephra		11.223																	7.97743	10.5427	20.7468	81.151	39.9471	144.155	1.31616	1.70872	214.032	5.17945	14.1691	2.33677	11.6713	3.64348	0.695819	4.46073	0.846541	5.79163	1.26403	3.91842	0.594276	4.17502	0.628875	4.42622
Straub et al. (2010)	ODP Leg 126, site 782A	782A-29X-5-13-15	782A-29X-5-13-15	Izu volcanic arc	30.861	141.314	tephra		12.01																	8.63269	30.0335	6.771	253.906	35.0564	63.7212	0.547617	0.588149	107.612	3.44396	9.75093	1.65784	9.32702	3.27143	1.13883	4.22457	0.793503	5.4106	1.18489	3.50815	0.511594	3.5748	0.531789	2.1556
Straub et al. (2010)	ODP Leg 126, site 782A	782A-29X-CC-5-7	782A-29X-CC-5-7	Izu rear- arc?	30.861	141.314	tephra		12.115																	5.24864	12.8967	34.6794	162.211	55.8846	242.12	7.80017	1.10266	179.373	18.6506	44.2833	6.24645	28.1966	7.35159	1.78287	7.82445	1.36973	8.85402	1.8943	5.67633	0.848923	5.89886	0.89685	6.32116
Straub et al. (2010)	ODP Leg 126, site 782A	782A-29X3-42-46	782A-29X3-42-46	Izu volcanic arc	30.861	141.314	tephra		12.115																	8.29825	39.4876	6.68358	211.069	33.0391	55.4798	0.51423	0.579463	98.3842	2.68617	7.97995	1.46308	8.25427	3.02833	1.05807	3.98037	0.74996	5.12775	1.12158	3.34027	0.489798	3.35332	0.499733	1.87433
Straub et al. (2010)	ODP Leg 126, site 782A	782A-29X6-124-126	782A-29X6-124-126	Izu volcanic arc	30.861	141.314	tephra		12.115																	8.23284	30.4005	7.46238	225.686	35.444	67.5725	0.66754	0.578921	119.906	3.58948	10.2073	1.82135	9.952	3.40014	1.14109	4.28764	0.802918	5.42128	1.17986	3.52543	0.515906	3.58314	0.532682	2.20929
Straub (2003)	ODP Leg 126, site 782A	782A-2H-4-11114	782A-2H-4-11114-11	Izu rear- arc?	30.861	141.314	plagioclase-hosted melt inclusion		0.5																			20.1	107	39.5	112.7	1.57	1.9	182	5.29	13.12	2.17	11.49	3.86	1.03	5.51	0.76	6.81	1.21	4.44	0.76	4.16	0.73	3.55
Straub and Layne (2003)	ODP Leg 126, site 782A	782A-2H-4-11114	782A-2H-4-11114-10A	Izu volcanic arc	30.861	141.314	plagioclase-hosted melt inclusion		0.5																			20.5	95	43.6	138.3	0.96	1.62	202	5.4	13.43	1.95	12.22	4.56	0.95	4.67	0.97	5.77	1.33	4.28	0.87	4.92	0.86	4.23
Straub and Layne (2003)	ODP Leg 126, site 782A	782A-2H-4-11114	782A-2H-4-11114-10B	Izu volcanic arc	30.861	141.314	plagioclase-hosted melt inclusion		0.5																			15.3	90	38.8	109.4	1.05	1.07	187	4.61	11.87	1.97	10.18	2.72	1.12	3.24	0.73	6.82	1.37	4.17	0.58	4.11	0.65	2.57
Straub and Layne (2003)	ODP Leg 126, site 782A	782A-2H-4-11114	782A-2H-4-11114-11	Izu rear- arc?	30.861	141.314	plagioclase-hosted melt inclusion		0.5																			20.1	107	39.5	112.7	1.57	1.9	182	5.29	13.12	2.17	11.49	3.86	1.03	5.51	0.76	6.81	1.21	4.44	0.76	4.16	0.73	3.55
Straub and Layne (2003)	ODP Leg 126, site 782A	782A-2H-4-11114	782A-2H-4-11114-7A	Izu volcanic arc	30.861	141.314	plagioclase-hosted melt inclusion		0.5																			7.6	127	31	55.6	0.43	0.78	97	2.81	7.13	1.3	7.77	3.09	0.68	3.79	0.8	5.36	0.98	3.79	0.52	3.76	0.59	2.12
Straub et al. (2010)	ODP Leg 126, site 782A	782A-2H-5-136-138	782A-2H-5-136-138	Izu volcanic arc	30.861	141.314	tephra		0.546					0.320505					0.0384602							14.3705	19.6319	13.5374	118.874	35.4978	102.165	0.898224	1.26555	182.765	4.29351	11.5315	1.99991	9.79229	3.33712	0.898854	4.4023	0.78526	5.32486	1.19645	3.59463		3.82322	0.602566	3.08434
Straub et al. (2010)	ODP Leg 126, site 782A	782A-2H-6-85-87	782A-2H-6-85-87	Izu volcanic arc	30.861	141.314	tephra		0.685					0.621839					0.0602316							5.48589	37.869	3.98739	169.777	17.5681	37.1562	0.367944	0.358315	60.6576	1.75958	4.81358	0.878398	4.52898	1.64039	0.621335	2.29387	0.410103	2.78059	0.619952	1.81797		1.87564	0.293639	1.1129
Straub et al. (2010)	ODP Leg 126, site 782A	782A-2H5-136-138	782A-2H5-136-138	Izu volcanic arc	30.861	141.314	tephra		0.685																	20.4	14	17	108	41.7	118.6	1.02	1.5	221	5.2	14	2.36	12.4	3.9	0.96	4.9	0.91	6.22	1.38	4.21	0.63	4.43	0.67	3.9
Straub et al. (2010)	ODP Leg 126, site 782A	782A-2H6-85-87	782A-2H6-85-87	Izu volcanic arc	30.861	141.314	tephra		0.685																	7.07207	40.1601	4.57958	164.151	18.0795	34.2767	0.313748	0.372885	66.2362	1.85915	5.45819	0.883313	4.96403	1.74172	0.639994	2.20741	0.414028	2.88153	0.633188	1.92781	0.282066	1.96271	0.296088	1.21007
Straub (2003)	ODP Leg 126, site 782A	782A-32X-2-26-28	782A-32X-2-26-28	Izu volcanic arc	30.861	141.314	glass shards from tephra		13.35																			16.5	177	32.5	64.6	0.55	1.45	176	3.41	9.09	1.52	8.53	3.03	0.94	4.24	0.75	5.47	1.2	3.63	0.56	3.95	0.61	2.25
Straub et al. (2010)	ODP Leg 126, site 782A	782A-33X-5-36-39	782A-33X-5-36-39	Izu volcanic arc	30.861	141.314	tephra		14.201					1.00476					0.0950154							6.40193	45.1609	7.16744	242.437	24.5152	41.9644	0.327414	0.611861	114.519	2.56437	6.9127	1.22799	6.4062	2.37027	0.874293	3.25064	0.580352	3.90324	0.864798	2.53904		2.59394	0.406116	1.34294
Straub (2003)	ODP Leg 126, site 782A	782A-33X-5-36-39	782A-33X-5-36-39	Izu volcanic arc	30.861	141.314	glass shards from tephra		14.2																			7.8	223	26.9	42	0.3	0.63	84	2.8	6.9	1.21	7.03	2.56	0.87	3.58	0.61	4.41	0.98	2.84	0.44	3.02	0.46	1.4
Straub et al. (2010)	ODP Leg 126, site 782A	782A-33X3-84-86	782A-33X3-84-86	Izu volcanic arc	30.861	141.314	tephra		14.201																	8.08337	38.6203	9.96141	194.33	28.0639	49.6731	0.455265	0.854201	108.244	2.70652	7.32796	1.27562	7.00237	2.43817	0.821405	3.18743	0.599201	4.17245	0.901807	2.72719	0.401766	2.7739	0.415908	1.64507
Straub et al. (2010)	ODP Leg 126, site 782A	782A-34XCC-23-25	782A-34XCC-23-25	Izu rear- arc?	30.861	141.314	tephra																			7.5376	29.7979	12.7035	217.231	34.1076	67.7952	1.04492	0.831046	193.541	4.82427	11.9626	1.94221	10.0025	3.20459	1.02934	4.01076	0.736124	4.97762	1.08955	3.28159	0.490893	3.34796	0.499153	2.09822
Straub et al. (2010)	ODP Leg 126, site 782A	782A-35X-2-102-104	782A-35X-2-102-104	Izu volcanic arc	30.861	141.314	tephra		24.14																	6.67049	21.7212	13.404	247.197	36.1621	65.1388	0.613838	1.33678	280.035	4.55261	11.6396	1.90921	10.2492	3.53726	1.07908	4.46106	0.851477	5.78605	1.27846	3.71194	0.548515	3.78294	0.567151	2.25988
Straub et al. (2010)	ODP Leg 126, site 782A	782A-36X-2-66-68	782A-36X-2-66-68	Izu volcanic arc	30.861	141.314	tephra							0.544442					0.163928							7.60105	19.8966	18.1093	312.482	26.5286	90.2846	2.15521	0.631871	278.525	7.71813	17.5268	2.65892	11.8107	3.35528	1.08301	3.85924	0.647919	4.15906	0.912609	2.68388		2.75473	0.437308	2.42323
Straub et al. (2010)	ODP Leg 126, site 782A	782A-36X-3-57-59	782A-36X-3-57-59	Izu volcanic arc	30.861	141.314	tephra							0.709154					0.245196							12.5518	23.8887	31.7238	283.463	35.3978	128.741	3.63259	1.10339	466.466	12.6614	27.3852	3.96951	17.0288	4.61486	1.34971	5.15708	0.878397	5.55362	1.21924	3.56401		3.6896	0.582783	3.43755
Straub et al. (2010)	ODP Leg 126, site 782A	782A-36X-3-57-59	782A-36X-3-57-59	Izu volcanic arc	30.861	141.314	tephra							0.706054					0.24737							12.4839	23.9362	32.027	284.634	35.5501	127.208	3.6239	1.09169	464.306	12.9396	27.8173	4.03279	17.3021	4.62989	1.35541	5.26615	0.884842	5.62909	1.23787	3.60687		3.71525	0.586433	3.47286
Straub et al. (2010)	ODP Leg 126, site 782A	782A-37X-1-40-42	782A-37X-1-40-42	Izu volcanic arc	30.861	141.314	tephra		29.223					0.680013					0.214588							6.9271	23.6732	9.57248	312.822	30.3028	82.3998	1.1134	0.363065	138.078	6.42488	15.9553	2.57251	12.0925	3.63248	1.2205	4.3897	0.733415	4.75004	1.0397	3.00911		3.03884	0.480556	2.24836
Straub et al. (2010)	ODP Leg 126, site 782A	782A-37X-4-43-45	782A-37X-4-43-45	Izu volcanic arc	30.861	141.314	tephra		29.223					0.177276					0.0393032							3.43406	3.65436	38.4715	120.521	14.3393	114.808	1.37531	1.17028	339.378	10.2294	20.6147	2.62884	9.43301	1.93638	0.484848	1.86046	0.309229	1.9475	0.441887	1.40837		1.81592	0.322359	3.21064
Straub (2003)	ODP Leg 126, site 782A	782A-37X-4-43-45	782A-37X-4-43-45	Izu volcanic arc	30.861	141.314	tephra		26.64																	4	3	34.5	172	13.3	96	1.17	1.07	274.2	9.36	19.29	2.38	9.15	1.84	0.48	1.77	0.29	1.84	0.4	1.32	0.22	1.62	0.28	2.86
Straub (2003)	ODP Leg 126, site 782A	782A-39X-1-21-23	782A-39X-1-21-23	Izu volcanic arc	30.861	141.314	tephra		29.61																	10	26	11.7	183	26.3	53	1.03	1.06	134.2	2.9	7.73	1.27	6.79	2.36	0.76	3.15	0.6	4.11	0.91	2.79	0.41	2.8	0.43	1.81
Straub et al. (2010)	ODP Leg 126, site 782A	782A-41X-5-58-60	782A-41X-5-58-60(DARK PUMICE)	Izu volcanic arc	30.861	141.314	tephra		39.981					0.765583					0.055726							9.25921	46.1106	6.27763	158.027	19.9443	38.398	0.259202	0.3252	33.8643	1.44469	4.20379	0.798422	4.27875	1.67589	0.646702	2.48421	0.451151	3.1013	0.698617	2.04525		2.13921	0.3373	1.14701
Straub et al. (2010)	ODP Leg 126, site 782A	782A-41X-5-58-60	782A-41X-5-58-60(LIGHT PUMICE)	Izu volcanic arc	30.861	141.314	tephra		39.981					0.835626					0.0549702							9.53388	44.9561	6.22244	154.186	19.5485	46.107	0.282664	0.278359	37.1152	1.44158	4.21211	0.797025	4.22428	1.65568	0.642554	2.44682	0.445866	3.04595	0.691826	2.02665		2.11005	0.336128	1.15558
Straub et al. (2010)	ODP Leg 126, site 782A	782A-41X-5-58-60	782A-41X-5-58-60(SCORIA)	Izu volcanic arc	30.861	141.314	tephra		39.981					0.67868					0.041972							13.1386	44.1034	9.06923	159.464	15.1136	35.5554	0.223331	0.235515	36.6879	1.0527	3.0904	0.594397	3.18223	1.25452	0.51063	1.89065	0.346869	2.37621	0.537959	1.59631		1.66663	0.264841	1.02438
Straub et al. (2010)	ODP Leg 126, site 782A	782A-42X-2-99-101	782A-42X-2-99-101	Izu volcanic arc	30.861	141.314	tephra		45.12					0.418009					0.0500728							22.3972	17.5948	17.2872	114.621	20.0867	88.1161	0.789554	0.615052	50.4782	3.15535	7.9938	1.36249	6.41676	2.07027	0.603142	2.63859	0.465497	3.04365	0.685345	2.01772		2.15338	0.34857	2.46376
Straub (2003)	ODP Leg 126, site 782A	782A-42X-2-99-101	782A-42X-2-99-101	Izu volcanic arc	30.861	141.314	tephra		45.12																	21	16	17.5	113	16.4	62	0.52	0.74	45.6	2.36	5.91	0.98	5.02	1.64	0.51	2.06	0.38	2.55	0.56	1.72	0.26	1.79	0.28	2.01
Straub et al. (2010)	ODP Leg 126, site 782A	782A-42X-CC-27-29	782A-42X-CC-27-29	Izu volcanic arc	30.861	141.314	tephra							0.49888					0.0797437							7.85042	21.8333	14.7412	203.748	16.8848	97.1243	0.942707	0.386401	51.9665	4.3577	10.9546	1.69667	7.5428	2.22216	0.631338	2.57381	0.429659	2.6748	0.57831	1.68352		1.71781	0.269661	2.5509
Straub et al. (2010)	ODP Leg 126, site 782A	782A-6H-3-47-52	782A-6H3-47-52	Izu volcanic arc	30.861	141.314	tephra																			15.055	18.6657	13.197	149.436	42.0553	98.1473	1.4105	1.14038	195.919	5.5487	14.3635	2.42521	12.8447	4.20265	1.2116	5.2472	0.967896	6.5669	1.43328	4.29764	0.641927	4.3825	0.666671	3.2315
Straub et al. (2010)	ODP Leg 126, site 782A	782A-7H-3-108-110	782A-7H-3-108-110	Izu volcanic arc	30.861	141.314	tephra																			12.4872	21.1086	8.41519	151.104	46.8992	98.5686	0.938781	0.51861	143.559	4.71662	13.4699	2.41359	13.2908	4.57447	1.45938	5.91089	1.06943	7.52361	1.64131	4.86982	0.730853	4.92641	0.735146	3.25641
Straub (2003)	ODP Leg 126, site 782A	782A-XCC-5-7	782A-XCC-5-7	Izu volcanic arc	30.861	141.314	tephra		12.31																	5	13	35	156	55	232	6.69	1.1	159.5	17.45	42.06	6.06	27.11	7.16	1.75	7.65	1.32	8.61	1.84	5.64	0.84	5.79	0.89	6.14
Samples in blue could come from the Izu rear-arc and are examined with cautions.
[truncated: 11 more columns]

## Sheet: bulk sediment
Table S1-2: Major and trace element composition of bulk volcaniclastics of the Izu arc front. Samples with La/Yb > 1.2 are in blue.
										wt%												ppm
References	Cruise expedition	Samples	Grain/glass shard number	Location	Latitutde	Longitude	Material	depth (mbsf)	age (Ma)	SiO2	Na2O	K2O	FeO	TiO2	MgO	CaO	MnO	Al2O3	P2O5	LOI	Total	Sc	Rb	Sr	Y	Zr	Nb	Cs	Ba	La	Ce	Pr	Nd	Sm	Eu	Gd	Tb	Dy	Ho	Er	Tm	Yb	Lu	Hf	Ta	Pb	Th	U	Ba/Th
Hiscott and Gill (1992)	ODP 126, Leg 787B	126-0787B-002R-001/103-107	126-0787B-002R-001/103-108	Izu volcanic arc	32.3757	140.749	Volcaniclastic	3.33	0.06	55.62	2.61	0.33	8.57509	0.77	3.59	9.36	0.17	16.34	0.1		97.4651	34	4	232	28	52			113		27
Hiscott and Gill (1992)	ODP 126, Leg 787B	126-0787B-002R-001/6-10	126-0787B-002R-001/6-11	Izu volcanic arc	32.3757	140.749	Volcaniclastic	2.36	0.04	54.6	2.6	0.37	8.13419	0.71	3.26	12.07	0.17	15.45	0.11		97.4742	32	7	322	29	56			135		25
Hiscott and Gill (1992)	ODP 126, Leg 787B	126-0787B-003R-002/76-79	126-0787B-003R-002/76-80	Izu volcanic arc	32.3757	140.749	Volcaniclastic	14.16	0.25	56.31	2.67	0.37	8.51211	0.77	3.42	9.27	0.17	15.78	0.12		97.3921	32	5	240	31	60			113
Hiscott and Gill (1992)	ODP 126, Leg 787B	126-0787B-014R-002/69-73	126-0787B-014R-002/69-74	Izu volcanic arc	32.3757	140.749	Volcaniclastic	119.69	26.7	49.53	3.78	1.5	10.6176	0.83	7.13	7.21	0.52	15.55	0.62		97.2876	43	17	151	42	51			227		58
Hiscott and Gill (1992)	ODP 126, Leg 787B	126-0787B-014R-003/72-76	126-0787B-014R-003/72-77	Izu volcanic arc	32.3757	140.749	Volcaniclastic	120.93	26.8	51.32	3.65	0.73	10.4917	0.83	8.25	4.73	0.33	17.45	0.09		97.8717	40	8	165	23	47			110		38															5
Hiscott and Gill (1992)	ODP 126, Leg 787B	126-0787B-015R-001/108-111	126-0787B-015R-001/108-112	Izu volcanic arc	32.3757	140.749	Volcaniclastic	128.28	27.1	53.05	3.63	0.74	9.65485	0.84	6.42	5.11	0.28	18.27	0.12		98.1149	40	9	211	24	62			122
Hiscott and Gill (1992)	ODP 126, Leg 787B	126-0787B-015R-004/26-29	126-0787B-015R-004/26-30	Izu volcanic arc	32.3757	140.749	Volcaniclastic	131.91	27.18	54.93	5.31	1.98	7.47734	0.92	4.28	4.35	0.15	18.89	0.02		98.3073	38	21	160	18	71			266		40															5
Hiscott and Gill (1992)	ODP 126, Leg 787B	126-0787B-016R-001/46-49	126-0787B-016R-001/46-50	Izu volcanic arc	32.3757	140.749	Volcaniclastic	137.26	27.25	56.38	4.94	1.71	8.15219	0.79	4.19	4.08	0.2	17.87	0.08		98.3922	41	23	169	23	90			294		49															7
Hiscott and Gill (1992)	ODP 126, Leg 787B	126-0787B-018R-001/17-20	126-0787B-018R-001/17-21	Izu volcanic arc	32.3757	140.749	Volcaniclastic	156.37	27.5	54.84	6.69	1.55	7.41435	1.09	3.61	4.59	0.19	18.43	0.18		98.5844	43	16	145	27	73			290		27
Hiscott and Gill (1992)	ODP 126, Leg 787B	126-0787B-018R-003/142-145	126-0787B-018R-003/142-146	Izu volcanic arc	32.3757	140.749	Volcaniclastic	160.02	27.55	56.2	4.95	1.3	10.3297	0.96	4.13	4.36	0.23	16.9	0.14		99.4997	41	14	195	28	93			153		28
Hiscott and Gill (1992)	ODP 126, Leg 787B	126-0787B-019R-003/31-34	126-0787B-019R-003/31-35	Izu volcanic arc	32.3757	140.749	Volcaniclastic	169.11	27.6	53.72	3.6	1.08	10.9146	1.13	4.44	6.28	0.26	16.48	0.2		98.1046
Hiscott and Gill (1992)	ODP 126, Leg 787B	126-0787B-019R-006/45-48	126-0787B-019R-006/45-49	Izu volcanic arc	32.3757	140.749	Volcaniclastic	173.75	27.7	54.53	3.35	1.11	9.35792	0.84	4.19	6.74	0.21	16.85	0.17		97.3479
Hiscott and Gill (1992)	ODP 126, Leg 787B	126-0787B-020R-001/15-16	126-0787B-020R-001/15-17	Izu volcanic arc	32.3757	140.749	Volcaniclastic	175.65	27.8	54.55	3.51	1.13	9.02499	1.01	3.86	7.56	0.21	17.75	0.21		98.815	34	9	220	27	64			104		22
Hiscott and Gill (1992)	ODP 126, Leg 787B	126-0787B-020R-004/20-23	126-0787B-020R-004/20-24	Izu volcanic arc	32.3757	140.749	Volcaniclastic	180.2	27.85	53.32	3.06	0.82	8.20618	0.73	4.47	9.49	0.18	18.45	0.13		98.8562	34	8	386	25	70			123		32															10
Hiscott and Gill (1992)	ODP 126, Leg 787B	126-0787B-021R-001/65-69	126-0787B-021R-001/65-70	Izu volcanic arc	32.3757	140.749	Volcaniclastic	185.75	27.87	52.02	2.36	0.51	8.47612	0.63	5.32	11.18	0.18	18.15	0.06		98.8861	35	5	302	14	47			45
Hiscott and Gill (1992)	ODP 126, Leg 787B	126-0787B-022R-001/47-50	126-0787B-022R-001/47-51	Izu volcanic arc	32.3757	140.749	Volcaniclastic	192.27	27.9	52.46	2.64	0.64	8.23317	0.64	4.84	10.19	0.18	18.16	0.07		98.0532	38	7	348	20	55			72
Hiscott and Gill (1992)	ODP 126, Leg 787B	126-0787B-023R-004/18-21	126-0787B-023R-004/18-22	Izu volcanic arc	32.3757	140.749	Volcaniclastic	209.08	28	53.04	2.65	0.7	8.5391	0.69	5.21	9.56	0.21	17.93	0.08		98.6091	31	6	268	16	50			50
Hiscott and Gill (1992)	ODP 126, Leg 787B	126-0787B-025R-004/10-13	126-0787B-025R-004/10-14	Izu volcanic arc	32.3757	140.749	Volcaniclastic	228.3	28.12	55.52	2.25	0.44	8.72806	0.69	5.38	9.34	0.18	17.9	0.05		100.478	48	5	243	18	56			41
Hiscott and Gill (1992)	ODP 126, Leg 787B	126-0787B-026R-005/19-22	126-0787B-026R-005/19-23	Izu volcanic arc	32.3757	140.749	Volcaniclastic	239.59	28.28	53.62	2.75	0.67	8.81804	0.71	4.49	9.44	0.21	17.11	0.1		97.918	30	10	310	26	69			120		38															8
Hiscott and Gill (1992)	ODP 126, Leg 787B	126-0787B-027R-001/77-80	126-0787B-027R-001/77-81	Izu volcanic arc	32.3757	140.749	Volcaniclastic	243.77	28.3	53.26	2.47	0.58	8.76405	0.71	4.14	9.78	0.18	17.34	0.09		97.3141	33	11	265	21	64			139		38															7
Hiscott and Gill (1992)	ODP 126, Leg 787B	126-0787B-027R-0CC/0-3	126-0787B-027R-0CC/0-4	Izu volcanic arc	32.3757	140.749	Volcaniclastic	428.12	28.38	53.62	2.7	0.43	9.03399	0.76	4	8.64	0.22	18.12	0.13		97.654	31	9	335	26	66			114		25
Hiscott and Gill (1992)	ODP 126, Leg 787B	126-0787B-031R-001/135-138	126-0787B-031R-001/135-139	Izu volcanic arc	32.3757	140.749	Volcaniclastic	283.05	28.63	52.2	2.08	0.22	9.12397	0.67	5.73	10.82	0.2	18.27	0.06		99.374	25	4	276	16	47			54		26
Hiscott and Gill (1992)	ODP 126, Leg 787B	126-0787B-032R-001/54-57	126-0787B-032R-001/54-58	Izu volcanic arc	32.3757	140.749	Volcaniclastic	291.84	28.7	51.34	1.99	0.2	9.51988	0.66	6.11	10.7	0.21	17.94	0.06		98.7299	28	4	263	15	43			50		31
Hiscott and Gill (1992)	ODP 126, Leg 787B	126-0787B-033R-002/68-71	126-0787B-033R-002/68-72	Izu volcanic arc	32.3757	140.749	Volcaniclastic	302.16	28.8	52.4	2.44	0.64	6.32559	0.71	4.03	11.62	0.15	20.17	0.15		98.6356	29	7	318	20	50			58
Hiscott and Gill (1992)	ODP 126, Leg 792A	126-0792A-002H-001/87-90	126-0792A-002H-001/87-91	Izu volcanic arc	32.3998	140.381	Volcaniclastic	10.57	0.14	54.79	2.56	0.33	9.37592	0.85	3.47	9.34	0.17	16.27	0.1		97.2559	34	3	217	28	54			739		33
Hiscott and Gill (1992)	ODP 126, Leg 792A	126-0792A-004H-005/14-17	126-0792A-004H-005/14-18	Izu volcanic arc	32.3998	140.381	Volcaniclastic	34.54	0.44	50.91	2.18	0.26	15.1076	1.13	5.42	8.41	0.25	12.9	0.07		96.6376	39	3	164	23	37			151
Hiscott and Gill (1992)	ODP 126, Leg 792A	126-0792A-006H-004/82-85	126-0792A-006H-004/82-86	Izu volcanic arc	32.3998	140.381	Volcaniclastic	52.52	0.65	55.05	2.53	0.41	10.7976	0.89	3.86	8.72	0.18	14.24	0.08		96.7576	37	4	160	27	54			103																	7
Hiscott and Gill (1992)	ODP 126, Leg 792A	126-0792A-007H-005/118-121	126-0792A-007H-005/118-122	Izu volcanic arc	32.3998	140.381	Volcaniclastic	63.45	0.78	54.4	2.44	0.31	11.0136	0.84	4.45	9.11	0.18	14.78	0.05		97.5736	43	3	167	27	51			90		31															10
Hiscott and Gill (1992)	ODP 126, Leg 792B	126-0792B-002H-006/132-135	126-0792B-002H-006/132-136	Izu volcanic arc	32.3998	140.381	Volcaniclastic	58.41	0.75	54.77	2.59	0.35	11.0945	0.85	3.83	9.22	0.18	14.22	0.07		97.1745	37	4	170	28	57			122		23
Hiscott and Gill (1992)	ODP 126, Leg 792B	126-0792B-003H-003/26-30	126-0792B-003H-003/26-31	Izu volcanic arc	32.3998	140.381	Volcaniclastic	62.86	0.77	53.31	2.49	0.36	12.1743	1.06	4.02	9.16	0.19	14.46	0.06		97.2843	41	4	168	28	54			97
Hiscott and Gill (1992)	ODP 126, Leg 792B	126-0792B-003H-004/90-93	126-0792B-003H-004/90-94	Izu volcanic arc	32.3998	140.381	Volcaniclastic	65	0.8	55.01	2.62	0.39	11.0495	0.83	3.69	8.72	0.18	14.43	0.06		96.9795	43	4	166	29	60			100		25
Hiscott and Gill (1992)	ODP 126, Leg 792E	126-0792E-004R-002/54-57	126-0792E-004R-002/54-58	Izu volcanic arc	32.3994	140.418	Volcaniclastic	166.54	3.2	52.69	2.23	0.3	10.8246	0.83	3.49	9.95	0.17	16.35	0.08		96.9146	41	4	206	23	38			97																	7
Hiscott and Gill (1992)	ODP 126, Leg 792E	126-0792E-007R-001/8-11	126-0792E-007R-001/8-12	Izu volcanic arc	32.3994	140.418	Volcaniclastic	193.48	5.9	54.4	2.18	0.55	9.33093	0.81	3.67	11.44	0.16	14.99	0.06		97.5909
Hiscott and Gill (1992)	ODP 126, Leg 792E	126-0792E-009R-003/68-73	126-0792E-009R-003/68-74	Izu volcanic arc	32.3994	140.418	Volcaniclastic	216.28	6.6	52.84	2.32	0.34	12.6782	1.14	4.86	8.26	0.19	14.1	0.08		96.8082	46	5	171	26	46			95
Hiscott and Gill (1992)	ODP 126, Leg 792E	126-0792E-009R-005/26-31	126-0792E-009R-005/26-32	Izu volcanic arc	32.3994	140.418	Volcaniclastic	217.86	6.7	53.22	1.81	0.33	9.42091	0.69	4.82	11.54	0.16	13.83	0.04		95.8609	41	8	168	26	32			177
Hiscott and Gill (1992)	ODP 126, Leg 792E	126-0792E-011R-001/87-90	126-0792E-011R-001/87-91	Izu volcanic arc	32.3994	140.418	Volcaniclastic	232.77	6.9	53.95	2.22	0.38	10.7706	0.78	4.74	9.23	0.17	15.05	0.03		97.3206	41	7	162	21	36			59
Hiscott and Gill (1992)	ODP 126, Leg 792E	126-0792E-012R-003/108-110	126-0792E-012R-003/108-111	Izu volcanic arc	32.3994	140.418	Volcaniclastic	245.58	7.4	53.61	1.82	0.36	8.60209	0.63	6.2	10.48	0.22	15.41	0.05		97.3821	34	7	238	17	31			176		30
Hiscott and Gill (1992)	ODP 126, Leg 792E	126-0792E-014R-0CC/19-23	126-0792E-014R-0CC/19-24	Izu volcanic arc	32.3994	140.418	Volcaniclastic	261.09	7.7	54.77	2.21	0.66	10.3837	0.75	3.59	9.48	0.17	15.01	0.05		97.0737	39	16	218	25	45			222
Hiscott and Gill (1992)	ODP 126, Leg 792E	126-0792E-016R-002/93-97	126-0792E-016R-002/93-98	Izu volcanic arc	32.3994	140.418	Volcaniclastic	282.63	9.5	54.68	2.31	0.58	10.9416	0.81	3.66	9.08	0.17	14.78	0.05		97.0616	36	13	217	28	51			161		39
Hiscott and Gill (1992)	ODP 126, Leg 792E	126-0792E-017R-002/46-50	126-0792E-017R-002/46-51	Izu volcanic arc	32.3994	140.418	Volcaniclastic	291.86	10	54.44	2.07	0.61	9.60087	0.71	4.04	10.53	0.17	14.99	0.1		97.2609	35	18	274	26	50			732		25
Hiscott and Gill (1992)	ODP 126, Leg 792E	126-0792E-023R-001/118-121	126-0792E-023R-001/118-122	Izu volcanic arc	32.3994	140.418	Volcaniclastic	348.78	12.7	55.57	2.19	0.37	10.9146	0.7	2.92	8.92	0.18	15.15	0.03		96.9446	54	8	194	22	35			100
Hiscott and Gill (1992)	ODP 126, Leg 792E	126-0792E-032R-003/81-84	126-0792E-032R-003/81-85	Izu volcanic arc	32.3994	140.418	Volcaniclastic	438.41	26.1	53.94	4.85	2.04	5.09287	0.61	4.2	5.33	0.16	21.4	0.05		97.6729	28	27	211	11	64			762																	7
Hiscott and Gill (1992)	ODP 126, Leg 792E	126-0792E-033R-001/105-108	126-0792E-033R-001/105-109	Izu volcanic arc	32.3994	140.418	Volcaniclastic	445.25	27.4	54.95	4.99	1.9	6.01066	0.78	4.86	4.62	0.18	19.39			97.6807	37	23	140	12	65			622		31
Hiscott and Gill (1992)	ODP 126, Leg 792E	126-0792E-034R-0CC/20-23	126-0792E-034R-0CC/20-24	Izu volcanic arc	32.3994	140.418	Volcaniclastic	458.86	28	53.74	4.5	1.81	7.08143	0.7	6.17	3.52	0.22	19.35	0.02		97.1114	34	22	141	14	65			450		31
Hiscott and Gill (1992)	ODP 126, Leg 792E	126-0792E-036R-001/30-34	126-0792E-036R-001/30-35	Izu volcanic arc	32.3994	140.418	Volcaniclastic	473.5	28.1	56.08	5.18	0.79	6.20862	0.95	4.71	3.67	0.21	21.42			99.2186	41	11	138	28	77			230		50
Hiscott and Gill (1992)	ODP 126, Leg 792E	126-0792E-037R-004/57-61	126-0792E-037R-004/57-62	Izu volcanic arc	32.3994	140.418	Volcaniclastic	487.87	28.15	53.36	2.9	0.91	6.43357	0.91	6.39	5.34	0.2	20.94	0.04		97.4236	41	13	167	16	55			113		21
Hiscott and Gill (1992)	ODP 126, Leg 792E	126-0792E-038R-005/50-54	126-0792E-038R-005/50-55	Izu volcanic arc	32.3994	140.418	Volcaniclastic	499	28.2	53.86	5.27	0.59	8.13419	0.74	6.15	4.35	0.21	18.15	0.1		97.5542	34	7	141	25	69			248		57															6
Hiscott and Gill (1992)	ODP 126, Leg 792E	126-0792E-039R-001/28-32	126-0792E-039R-001/28-33	Izu volcanic arc	32.3994	140.418	Volcaniclastic	502.48	28.22	55.14	5.32	0.68	7.71129	0.86	5.17	3.36	0.17	18.7	0.02		97.1313	31	7	121	16	80			182		35
Hiscott and Gill (1992)	ODP 126, Leg 792E	126-0792E-040R-002/57-62	126-0792E-040R-002/57-63	Izu volcanic arc	32.3994	140.418	Volcaniclastic	513.97	28.28	54.6	4.69	0.66	7.98123	0.75	5.54	5.14	0.2	18.4	0.13		98.0912	38	7	158	20	69			214		36															5
Hiscott and Gill (1992)	ODP 126, Leg 792E	126-0792E-040R-006/7-11	126-0792E-040R-006/7-12	Izu volcanic arc	32.3994	140.418	Volcaniclastic	519.47	28.3	54.37	4.71	0.54	7.38736	0.72	4.85	6.37	0.16	18.92	0.08		98.1074	28	6	351	21	70			234		52
Hiscott and Gill (1992)	ODP 126, Leg 792E	126-0792E-041R-003/143-147	126-0792E-041R-003/143-148	Izu volcanic arc	32.3994	140.418	Volcaniclastic	526.03	28.35	53.41	1.97	0.48	8.31415	0.7	5.79	8.89	0.17	18.09	0.11		97.9242	35	4	277	23	67			90		24
Hiscott and Gill (1992)	ODP 126, Leg 792E	126-0792E-042R-001/75-78	126-0792E-042R-001/75-79	Izu volcanic arc	32.3994	140.418	Volcaniclastic	531.95	28.4	54.37	4.64	0.81	7.81926	0.68	5.63	6.23	0.15	18.43	0.06		98.8193	30	8	213	21	60			118		31															5
Hiscott and Gill (1992)	ODP 126, Leg 792E	126-0792E-042R-006/80-83	126-0792E-042R-006/80-84	Izu volcanic arc	32.3994	140.418	Volcaniclastic	539.5	28.45	54.02	1.93	0.8	8.04421	0.72	5.54	8.18	0.18	18.05	0.06		97.5242	35	4	255	17	72			66		30															5
Hiscott and Gill (1992)	ODP 126, Leg 792E	126-0792E-043R-004/91-94	126-0792E-043R-004/91-95	Izu volcanic arc	32.3994	140.418	Volcaniclastic	545.82	28.48	55.29	6.22	0.58	6.64052	0.68	4.51	5.37	0.16	19.29	0.01		98.7505	24	5	172	14	68			161		38
Hiscott and Gill (1992)	ODP 126, Leg 792E	126-0792E-044R-003/62-66	126-0792E-044R-003/62-67	Izu volcanic arc	32.3994	140.418	Volcaniclastic	553.93	28.5	53.4	4.79	0.82	8.24217	0.8	6.42	4.69	0.16	17.88	0.06		97.2622	28	7	136	25	70			82		43
Hiscott and Gill (1992)	ODP 126, Leg 792E	126-0792E-045R-003/124-127	126-0792E-045R-003/124-128	Izu volcanic arc	32.3994	140.418	Volcaniclastic	564.16	28.52	53.58	4.27	1.25	8.45812	0.72	7.65	3.74	0.2	17.74	0.06		97.6681	33	15	122	22	70			176		24
Hiscott and Gill (1992)	ODP 126, Leg 792E	126-0792E-046R-001/52-55	126-0792E-046R-001/52-56	Izu volcanic arc	32.3994	140.418	Volcaniclastic	570.22	28.56	52.46	4	1.13	8.39513	0.82	8.15	3.82	0.18	17.77	0.01		96.7351	29	15	128	25	66			117
Hiscott and Gill (1992)	ODP 126, Leg 792E	126-0792E-047R-002/88-93	126-0792E-047R-002/88-94	Izu volcanic arc	32.3994	140.418	Volcaniclastic	581.51	28.67	52.22	3.92	0.66	8.80904	0.7	8.98	5.97	0.31	16.55	0.03		98.149	39	8	110	20	48			50
Hiscott and Gill (1992)	ODP 126, Leg 792E	126-0792E-048R-006/49-53	126-0792E-048R-006/49-54	Izu volcanic arc	32.3994	140.418	Volcaniclastic	595.54	28.69	52.19	2.26	0.33	8.61109	0.91	4.68	9.88	0.16	19.13	0.03		98.1811	30	4	428	22	78			120		38
Hiscott and Gill (1992)	ODP 126, Leg 792E	126-0792E-049R-002/97-101	126-0792E-049R-002/97-102	Izu volcanic arc	32.3994	140.418	Volcaniclastic	600.27	28.71	54.22	2.14	0.31	7.91824	0.71	4.76	8.92	0.19	18.81	0.11		98.0882	29	4	397	28	68			82		29															5
Hiscott and Gill (1992)	ODP 126, Leg 792E	126-0792E-049R-004/90-94	126-0792E-049R-004/90-95	Izu volcanic arc	32.3994	140.418	Volcaniclastic	603.05	28.72	54.21	2.3	0.3	7.35137	0.74	4.95	9.91	0.19	19.27	0.09		99.3114	27	3	441	27	74			80
Hiscott and Gill (1992)	ODP 126, Leg 792E	126-0792E-050R-003/114-118	126-0792E-050R-003/114-119	Izu volcanic arc	32.3994	140.418	Volcaniclastic	611.54	28.74	53.95	2.01	0.22	7.91824	0.75	5.7	9.47	0.21	18.31	0.06		98.5982	34	4	324	20	64			55		34
Hiscott and Gill (1992)	ODP 126, Leg 792E	126-0792E-052R-001/146-149	126-0792E-052R-001/146-150	Izu volcanic arc	32.3994	140.418	Volcaniclastic	628.26	28.8	53.88	2.27	0.41	7.1894	0.67	3.93	11.32	0.12	17.68	0.07		97.5394	34	6	667	14	39			140		22															6
Hiscott and Gill (1992)	ODP 126, Leg 792E	126-0792E-054R-003/81-84	126-0792E-054R-003/81-85	Izu volcanic arc	32.3994	140.418	Volcaniclastic	649.91	28.86	55.41	7.79	0.39	6.80249	0.71	4.72	4.14	0.19	17.73	0.07		97.9525	33	5	61	21	70			38		44
Hiscott and Gill (1992)	ODP 126, Leg 792E	126-0792E-055R-0CC/7-11	126-0792E-055R-0CC/7-12	Izu volcanic arc	32.3994	140.418	Volcaniclastic	659.23	28.88	52.67	1.61	0.54	8.28716	0.67	8.6	9.11	0.15	16.4	0.08		98.1172	41	4	216	20	46			34		32
Hiscott and Gill (1992)	ODP 126, Leg 792E	126-0792E-056R-001/36-39	126-0792E-056R-001/36-40	Izu volcanic arc	32.3994	140.418	Volcaniclastic	665.76	28.92	52.74	1.63	0.17	8.37714	0.65	7.55	10.7	0.16	17.07	0.05		99.0971	40		231	16	43			26
Hiscott and Gill (1992)	ODP 126, Leg 792E	126-0792E-056R-005/33-36	126-0792E-056R-005/33-37	Izu volcanic arc	32.3994	140.418	Volcaniclastic	671.73	28.95	56.17	2.64	0.31	6.00167	0.69	3.76	9.13	0.13	18.94	0.08		97.8517	26		389	27	79			114		56
Hiscott and Gill (1992)	ODP 126, Leg 792E	126-0792E-057R-003/102-105	126-0792E-057R-003/102-106	Izu volcanic arc	32.3994	140.418	Volcaniclastic	679.12	28.98	55.57	2.54	0.44	7.00044	0.64	4.13	8.82	0.13	18.17	0.05		97.4904	26	5	398	19	78			129
Hiscott and Gill (1992)	ODP 126, Leg 792E	126-0792E-058R-004/8-12	126-0792E-058R-004/8-13	Izu volcanic arc	32.3994	140.418	Volcaniclastic	689.38	29	52.69	2.37	0.34	10.2127	0.86	5.08	8.96	0.14	16.78	0.04		97.4727	43	5	361	23	73			96		32
Hiscott and Gill (1992)	ODP 126, Leg 792E	126-0792E-059R-003/44-48	126-0792E-059R-003/44-49	Izu volcanic arc	32.3994	140.418	Volcaniclastic	697.71	29.02	50.46	2.19	0.3	11.5354	1.22	4.75	10.13	0.15	16.71	0.16		97.6054	52	4	377	28	56			122		26
Hiscott and Gill (1992)	ODP 126, Leg 792E	126-0792E-060R-004/127-130	126-0792E-060R-004/127-131	Izu volcanic arc	32.3994	140.418	Volcaniclastic	709.77	29.05	52.41	2.47	0.31	9.25894	0.77	5.09	9.24	0.13	17.51	0.07		97.2589	39	4	346	30	63			76		50
Hiscott and Gill (1992)	ODP 126, Leg 792E	126-0792E-061R-002/32-36	126-0792E-061R-002/32-37	Izu volcanic arc	32.3994	140.418	Volcaniclastic	715.42	29.1	52.06	2.56	0.39	9.15996	0.76	5.17	8.96	0.12	18.06	0.11		97.35	41	5	386	26	60			68		42
Hiscott and Gill (1992)	ODP 126, Leg 792E	126-0792E-062R-005/57-60	126-0792E-062R-005/57-61	Izu volcanic arc	32.3994	140.418	Volcaniclastic	728.12	29.5	54.43	6.06	1.44	6.7485	0.82	5.17	3.09	0.1	19.66	0.14		97.6585	25	11	112	22	84			208		37
Hiscott and Gill (1992)	ODP 126, Leg 792E	126-0792E-063R-001/130-134	126-0792E-063R-001/130-135	Izu volcanic arc	32.3994	140.418	Volcaniclastic	733.8	29.7	52.62	7.34	0.91	7.76527	0.72	5.55	3.22	0.08	19.83	0.1		98.1353	25	6	109	26	59			119		49
Hiscott and Gill (1992)	ODP 126, Leg 792E	126-0792E-064R-002/146-149	126-0792E-064R-002/146-150	Izu volcanic arc	32.3994	140.418	Volcaniclastic	745.11	29.9	52.43	7.18	0.92	7.92724	0.72	6.16	3.47	0.09	19.48	0.12		98.4972	28	7	105	22	54			81		23
Hiscott and Gill (1992)	ODP 126, Leg 792E	126-0792E-065R-001/111-116	126-0792E-065R-001/111-117	Izu volcanic arc	32.3994	140.418	Volcaniclastic	752.91	30.1	53.55	2.52	1.08	7.69329	0.66	7.62	4.44	0.13	20.55	0.11		98.3533	25	21	212	18	47			78
Hiscott and Gill (1992)	ODP 126, Leg 792E	126-0792E-067R-003/98-102	126-0792E-067R-003/98-103	Izu volcanic arc	32.3994	140.418	Volcaniclastic	775.18	30.5	52.05	2.26	1.25	8.64708	0.75	9.37	5.45	0.4	17.23	0.08		97.4871	37	8	147	20	43			56		38
Hiscott and Gill (1992)	ODP 126, Leg 792E	126-0792E-068R-001/64-68	126-0792E-068R-001/64-69	Izu volcanic arc	32.3994	140.418	Volcaniclastic	781.54	30.7	51.78	2.22	0.72	6.20862	0.81	5.8	9.59	1.35	19.29	0.05		97.8186	41	3	287	16	48			39		33
Hiscott and Gill (1992)	ODP 126, Leg 792E	126-0792E-068R-002/6-10	126-0792E-068R-002/6-11	Izu volcanic arc	32.3994	140.418	Volcaniclastic	782.2	30.9	51.12	1.61	0.43	8.47612	0.89	6.43	11.19	0.53	17.68	0.08		98.4361	45	7	227	23	42			47		33
Hiscott and Gill (1992)	ODP 126, Leg 793A	126-0793A-008H-001/32-36	126-0793A-008H-001/32-37	Izu volcanic arc	31.1057	140.888	Volcaniclastic	61.52	0.55	52.31	2.19	0.49	12.0753	1.04	4.53	10.18	0.21	14.16	0.1		97.2853	57	9	215	26	54			111		26															9
Hiscott and Gill (1992)	ODP 126, Leg 793A	126-0793A-009H-002/111-114	126-0793A-009H-002/111-115	Izu volcanic arc	31.1057	140.888	Volcaniclastic	73.51	0.7	52.62	2.34	0.4	12.2643	1.14	3.96	9.5	0.22	14.41	0.12		96.9743	41	5	213	26	51			139		27
Hiscott and Gill (1992)	ODP 126, Leg 793B	126-0793B-003R-001/66-70	126-0793B-003R-001/66-71	Izu volcanic arc	31.1059	140.888	Volcaniclastic	604.96	15.1	55.57	2.05	0.57	11.2475	0.88	4.39	7.86	0.18	14.68	0.05		97.4775	46	12	168	23	40			241
Hiscott and Gill (1992)	ODP 126, Leg 793B	126-0793B-011R-001/104-107	126-0793B-011R-001/104-108	Izu volcanic arc	31.1059	140.888	Volcaniclastic	682.44	16.5	56.39	1.86	0.38	8.82704	0.58	4.52	8.99	0.17	16.75	0.05		98.517	32	7	178	18	30			115		28															5
Hiscott and Gill (1992)	ODP 126, Leg 793B	126-0793B-019R-004/47-51	126-0793B-019R-004/47-52	Izu volcanic arc	31.1059	140.888	Volcaniclastic	763.02	23.5	53.19	5.48	1.25	8.5391	0.83	4.72	2.73	0.88	19.51	0.13		97.2591	39	23	238	29	72			316		48
Hiscott and Gill (1992)	ODP 126, Leg 793B	126-0793B-020R-004/91-95	126-0793B-020R-004/91-96	Izu volcanic arc	31.1059	140.888	Volcaniclastic	773.08	24.95	55.55	2.94	0.98	9.11497	0.82	3.66	7.03	0.19	16.83	0.1		97.215	29	12	877	22	73			411		39
Hiscott and Gill (1992)	ODP 126, Leg 793B	126-0793B-022R-003/33-36	126-0793B-022R-003/33-37	Izu volcanic arc	31.1059	140.888	Volcaniclastic	790.57	25.75	53.04	4.97	1.04	8.26916	0.63	4.48	7.23	0.22	19.25	0.13		99.2592	29	18	222	18	51			541		49															8
Hiscott and Gill (1992)	ODP 126, Leg 793B	126-0793B-023R-004/9-12	126-0793B-023R-004/9-13	Izu volcanic arc	31.1059	140.888	Volcaniclastic	801.46	26.6	50.51	3.13	0.33	9.66385	0.76	5.19	9.77	0.22	18.3	0.06		97.9339	35	3	346	19	50			71		25															6
Hiscott and Gill (1992)	ODP 126, Leg 793B	126-0793B-024R-002/5-9	126-0793B-024R-002/5-10	Izu volcanic arc	31.1059	140.888	Volcaniclastic	808.25	27.15	51.23	3.27	0.55	8.98	0.8	4.49	10	0.19	18.64	0.08		98.23	33	6	396	23	59			217		22
Hiscott and Gill (1992)	ODP 126, Leg 793B	126-0793B-025R-001/147-151	126-0793B-025R-001/147-152	Izu volcanic arc	31.1059	140.888	Volcaniclastic	817.87	27.6	53.17	4.32	0.77	9.15996	0.89	4.81	8.09	0.18	17.09	0.07		98.55	36	10		19	54			495		24
Hiscott and Gill (1992)	ODP 126, Leg 793B	126-0793B-026R-005/125-129	126-0793B-026R-005/125-130	Izu volcanic arc	31.1059	140.888	Volcaniclastic	832.82	27.8	51.51	4.23	0.55	9.13297	0.69	7.97	6.36	0.22	17.74	0.08		98.483	36	14	371	20	43			216		32
Hiscott and Gill (1992)	ODP 126, Leg 793B	126-0793B-027R-006/35-40	126-0793B-027R-006/35-41	Izu volcanic arc	31.1059	140.888	Volcaniclastic	842.96	27.97	53.51	4.16	0.5	8.62908	0.77	5.68	7.13	0.19	17.88	0.05		98.4991	38	6	91	20	51			123		45															5
Hiscott and Gill (1992)	ODP 126, Leg 793B	126-0793B-028R-006/33-37	126-0793B-028R-006/33-38	Izu volcanic arc	31.1059	140.888	Volcaniclastic	851.96	28.05	54.02	5.17	1.27	8.45812	0.76	4.03	5.74	0.19	17.75	0.12		97.5081	34	19	149	28	70			597		53
Hiscott and Gill (1992)	ODP 126, Leg 793B	126-0793B-029R-005/109-112	126-0793B-029R-005/109-113	Izu volcanic arc	31.1059	140.888	Volcaniclastic	861.09	28.15	53.05	4.46	1.21	9.10598	0.68	4.61	6.79	0.19	18.32	0.09		98.506	39	17	225	19	55			385		62															10
Hiscott and Gill (1992)	ODP 126, Leg 793B	126-0793B-030R-003/25-29	126-0793B-030R-003/25-30	Izu volcanic arc	31.1059	140.888	Volcaniclastic	867.65	28.2	50.98	3.99	0.85	9.34892	0.59	6.81	6.56	0.25	18.63	0.1		98.1089	35	22	188	20	44			223		43
Hiscott and Gill (1992)	ODP 126, Leg 793B	126-0793B-032R-001/39-43	126-0793B-032R-001/39-44	Izu volcanic arc	31.1059	140.888	Volcaniclastic	884.09	28.4	53.66	4.02	0.61	7.57632	0.59	3.4	8.66	0.18	20.29	0.11		99.0963	27	10	540	21	54			491		30
Hiscott and Gill (1992)	ODP 126, Leg 793B	126-0793B-034R-002/44-47	126-0793B-034R-002/44-48	Izu volcanic arc	31.1059	140.888	Volcaniclastic	904.84	28.64	56.43	4.06	0.68	7.2074	0.62	3.09	7.65	0.17	18.52	0.12		98.5474	24	9	457	22	60			504		44
Hiscott and Gill (1992)	ODP 126, Leg 793B	126-0793B-035R-002/139-142	126-0793B-035R-002/139-143	Izu volcanic arc	31.1059	140.888	Volcaniclastic	915.37	28.72	52.07	4.83	0.46	7.99022	0.68	3.68	7.7	0.17	20.56	0.06		98.2002	27	7	252	18	37			383		28
Hiscott and Gill (1992)	ODP 126, Leg 793B	126-0793B-036R-006/103-107	126-0793B-036R-006/103-108	Izu volcanic arc	31.1059	140.888	Volcaniclastic	930.25	28.85	53.9	5	0.45	7.71129	0.66	3.78	7.68	0.18	18.26	0.1		97.7213	24	6	246	23	59			307		21															5
Hiscott and Gill (1992)	ODP 126, Leg 793B	126-0793B-048R-003/58-60	126-0793B-048R-003/58-61	Izu volcanic arc	31.1059	140.888	Volcaniclastic	1041.18	29.47	56.1	1.92	0.77	9.92479	0.58	4.7	8.11	0.2	15.64	0.09		98.0348	37	10	268	27	59			148		43															7
Hiscott and Gill (1992)	ODP 126, Leg 793B	126-0793B-050R-001/80-83	126-0793B-050R-001/80-84	Izu volcanic arc	31.1059	140.888	Volcaniclastic	1057.8	29.52	53.5	1.64	0.36	9.007	0.53	7.25	9.88	0.19	15.92	0.04		98.317	44	21	215	15	35			129
Hiscott and Gill (1992)	ODP 126, Leg 793B	126-0793B-051R-005/6-9	126-0793B-051R-005/6-10	Izu volcanic arc	31.1059	140.888	Volcaniclastic	1071.7	29.6	52.35	3.13	1.09	8.69207	0.52	10.32	6.78	0.25	14.82	0.06		98.0121	38	4	228	17	45			57		36															7
Hiscott and Gill (1992)	ODP 126, Leg 793B	126-0793B-052R-001/93-97	126-0793B-052R-001/93-98	Izu volcanic arc	31.1059	140.888	Volcaniclastic	1077.23	29.63	53.48	2.73	0.61	8.61109	0.56	8.16	8.79	0.19	14.8	0.06		97.9911	39	11	357	16	34			58		42
Hiscott and Gill (1992)	ODP 126, Leg 793B	126-0793B-053R-003/145-149	126-0793B-053R-003/145-150	Izu volcanic arc	31.1059	140.888	Volcaniclastic	1090.42	29.67	55.23	1.02	0.61	8.60209	0.51	7.36	9.17	0.26	16.48	0.09		99.3321	35	4	156	18	37			161		32
Hiscott and Gill (1992)	ODP 126, Leg 793B	126-0793B-054R-003/103-107	126-0793B-054R-003/103-108	Izu volcanic arc	31.1059	140.888	Volcaniclastic	1098.57	29.69	53.34	1.45	0.32	9.08798	0.47	7.22	10.56	0.18	15.49	0.06		98.178	41	4	212	14	34			52
Hiscott and Gill (1992)	ODP 126, Leg 793B	126-0793B-056R-003/26-30	126-0793B-056R-003/26-31	Izu volcanic arc	31.1059	140.888	Volcaniclastic	1118.26	29.73	54.64	2.24	0.4	8.20618	0.48	5.67	9.6	0.16	16.76	0.1		98.2562	30	4	567	19	42			173		26															7
Hiscott and Gill (1992)	ODP 126, Leg 793B	126-0793B-057R-002/139-143	126-0793B-057R-002/139-144	Izu volcanic arc	31.1059	140.888	Volcaniclastic	1127.59	29.77	53.4	4.15	0.63	8.5571	0.49	6.45	7.94	0.18	16.58	0.09		98.4671	32	7	179	20	39			93		40
Hiscott and Gill (1992)	ODP 126, Leg 793B	126-0793B-058R-006/22-26	126-0793B-058R-006/22-27	Izu volcanic arc	31.1059	140.888	Volcaniclastic	1141.05	29.8	53.33	6.57	0.96	8.59309	0.45	7.2	4.86	0.23	17.21	0.07		99.4731	41	9	33	16	34			40		26
Hiscott and Gill (1992)	ODP 126, Leg 793B	126-0793B-059R-005/74-77	126-0793B-059R-005/74-78	Izu volcanic arc	31.1059	140.888	Volcaniclastic	1149.91	29.85	51.81	2.53	0.95	9.02499	0.51	8.29	9.36	0.21	15.1	0.05		97.835	39	4	561	18	34			235		43
Hiscott and Gill (1992)	ODP 126, Leg 793B	126-0793B-063R-003/15-19	126-0793B-063R-003/15-20	Izu volcanic arc	31.1059	140.888	Volcaniclastic	1185.35	29.97	56.43	3.62	0.45	7.90024	0.51	5.79	5.93	0.42	16.35	0.11		97.5102	32	8	439	20	44			262		26
Hiscott and Gill (1992)	ODP 126, Leg 793B	126-0793B-064R-006/14-18	126-0793B-064R-006/14-19	Izu volcanic arc	31.1059	140.888	Volcaniclastic	1198.98	29.98	55.16	3.42	0.42	7.62131	0.54	4.53	8.84	0.16	18.27	0.14		99.1013	24	5	281	21	57			96
Hiscott and Gill (1992)	ODP 126, Leg 793B	126-0793B-067R-001/56-60	126-0793B-067R-001/56-61	Izu volcanic arc	31.1059	140.888	Volcaniclastic	1221.36	30.04	53.85	4.18	0.42	9.04299	0.58	5.01	7.4	0.18	17.73	0.09		98.483	28	8	223	22	60			66		38
Hiscott and Gill (1992)	ODP 126, Leg 793B	126-0793B-069R-002/145-148	126-0793B-069R-002/145-149	Izu volcanic arc	31.1059	140.888	Volcaniclastic	1243.09	30.1	54.98	4.34	0.48	7.68429	0.58	4.77	7.4	0.17	17.77	0.1		98.2743	21	8	516	21	53			173		39
Hiscott and Gill (1992)	ODP 126, Leg 793B	126-0793B-073R-002/0-4	126-0793B-073R-002/0-5	Izu volcanic arc	31.1059	140.888	Volcaniclastic	1279.66	30.27	56.03	2.37	0.56	8.28716	0.67	3.95	7.58	0.18	18.45	0.09		98.1672	25	5	382	25	69			180		57
Hiscott and Gill (1992)	ODP 126, Leg 793B	126-0793B-082R-003/75-79	126-0793B-082R-003/75-80	Izu volcanic arc	31.1059	140.888	Volcaniclastic	1368.85	30.9	56.11	3.11	0.57	8.73706	0.7	3.99	7.29	0.15	17.28	0.12		98.0571	27	9	321	28	88			122		28
Hiscott and Gill (1992)	ODP 126, Leg 788D	ODP0126-0788D-005R-001/42-45	ODP0126-0788D-005R-001/42-46	Izu volcanic arc	30.922	140.004	Volcaniclastic		4.02	54.53	2.34	0.8	13.533	1	4.64	7.38	0.18	14	0.06		98.463
Hiscott and Gill (1992)	ODP 126, Leg 788D	ODP0126-0788D-006R-001/24-27	ODP0126-0788D-006R-001/24-28	Izu volcanic arc	30.922	140.004	Volcaniclastic	268.14	4.14	55.52	2.44	0.69	12.0483	0.96	4.29	7.37	0.18	14.58	0.08		98.1583	46	10	165	25	46			67		20
Hiscott and Gill (1992)	ODP 126, Leg 788D	ODP0126-0788D-007R-00CC/7-10	ODP0126-0788D-007R-00CC/7-11	Izu volcanic arc	30.922	140.004	Volcaniclastic	279.48	4.17	56.36	2.64	1.15	11.3555	0.89	4.46	6.98	0.15	14.89	0.05		98.9255	41	12	163	21	45			60
Hiscott and Gill (1992)	ODP 126, Leg 788D	ODP0126-0788D-008R-001/29-32	ODP0126-0788D-008R-001/29-33	Izu volcanic arc	30.922	140.004	Volcaniclastic	287.49	4.2	54.8	2.45	0.84	10.6446	0.68	4.81	7.57	0.15	15.37	0.08		97.3946	38	10	160	31	47			69		28															5
Hiscott and Gill (1992)	ODP 126, Leg 788D	ODP0126-0788D-009R-001/101-105	ODP0126-0788D-009R-001/101-106	Izu volcanic arc	30.922	140.004	Volcaniclastic	297.91	4.23	55.31	2.51	0.88	11.4455	0.89	4.52	8.23	0.16	14.57	0.1		98.6155	39	11	165	21	49			52																	5
Hiscott and Gill (1992)	ODP 126, Leg 790B	ODP0126-0790B-008H-005/118-121	ODP0126-0790B-008H-005/118-122	Izu volcanic arc	30.9161	139.844	Volcaniclastic	68.78	0.07	55.93	2.93	0.45	9.37592	0.89	3.27	8.72	0.18	15.85	0.15		97.7459	34	5	210	31	68			104		27
Hiscott and Gill (1992)	ODP 126, Leg 791B	ODP0126-0791B-045R-002/56-59	ODP0126-0791B-045R-002/56-60	Izu volcanic arc	30.9165	139.87	Volcaniclastic	812.36	0.92	53.08	2.19	0.5	8.89902	0.78	6.47	8.81	0.17	15.63	0.09		96.619	36	8	360	20	51			129
Gill et al. (1994)	ODP Leg 126, 790B	790B-8H-5-118-121	790B-8H-5-118-121	Izu volcanic arc	30.9161	139.844	Volcaniclastic		0.07	55.93	2.93	0.45	9.37592	0.89	3.27	8.72	0.18	15.85	0.15		97.7459		6.1	210	25	64	1.2		83	4.2	11.1	1.87	9.72	2.87	1	4.05	0.64	4.29	0.92	2.8l	0.42	2.74	0.4l	1.79	0.08	4.2	0.44	0.2	188.636
Gill et al. (1994)	ODP Leg 126, 788D	788D--7R-CC--7-10	788D--7R-CC--7-10	Izu volcanic arc	30.922	140.004	Volcaniclastic		4.17	56.36	2.64	1.15	11.3555	0.89	4.46	6.98	0.15	14.89	0.05		98.9255		12	163	21	45	0.5		60	2.11	6.04	1.11	6.02	2.15	0.81	2.99	0.56	3.74	0.81	2.52	0.38	2.56	0.37	1.31	0.19	3.1	0.18	0.2	333.333
Gill et al. (1994)	ODP Leg 126, 788D	788D--9R-1--101-105	788D--9R-1--101-105	Izu volcanic arc	30.922	140.004	Volcaniclastic		4.23	55.31	2.51	0.88	11.4455	0.89	4.52	8.23	0.16	14.57	0.1		98.6155		11	164	21	49	0.5		52	2.02	5.9l	1.07	6.15	2.24	0.78	3.01	0.55	3.76	0.83	2.56	0.4	2.48	0.4	1.68	0.04	2.2	0.14	0.14	371.429
Gill et al. (1994)	ODP Leg 126, 792E	792E--9R-3--68-73	792E--9R-3--68-73	Izu volcanic arc	32.3994	140.418	Volcaniclastic		6.6	52.84	2.32	0.34	12.6782	1.14	4.86	8.26	0.19	14.1	0.08		96.8082		4.5	171	26	46	0.4		95	1.78	5.57	1.09	6.18	2.58	0.96	3.69	0.66	4.52	0.99	2.87	0.45	2.87	0.47	1.68	0.04	2.2	0.28	0.17	339.286
Gill et al. (1994)	ODP Leg 126, 792E	792E-11R-1-87-90	792E-11R-1-87-90	Izu volcanic arc	32.3994	140.418	Volcaniclastic		6.9	53.95	2.22	0.38	10.7706	0.78	4.74	9.23	0.17	15.05	0.03		97.3206		7.1	162	20	36	0.3		59	1.41	4.6	0.85	4.94	1.87	0.7l	2.89	0.5	3.49	0.76	2.37	0.35	2.31	0.38	1.26	0.03	2.7	0.29	0.09	203.448
Gill et al. (1994)	ODP Leg 126, 792E	792E--23R-1--118-121	792E--23R-1--118-121	Izu volcanic arc	32.3994	140.418	Volcaniclastic		12.7	55.57	2.19	0.37	10.9146	0.7	2.92	8.92	0.18	15.15	0.03		96.9446		7.3	188	18	33	0.2	0.6	85	1.15	3.82	0.75	4.4	1.76	0.71	2.59	0.49	3.46	0.76	2.3	0.35	2.33	0.34	1.28	0.01	2.8	0.78	0.09	108.974
Gill et al. (1994)	ODP Leg 126, 793B	793B--3R-I--66-70	793B--3R-I--66-70	Izu volcanic arc	31.1059	140.888	Volcaniclastic		15.1	55.57	2.05	0.57	11.2475	0.88	4.39	7.86	0.18	14.68	0.05		97.4775		12.4	168	23	40	0.6		242	2.74	7.43	1.24	6.54	2.37	0.83	3.17	0.61	4.07	0.86	2.62	0.39	2.72	0.4	1.35	0.05	5.4	0.88	0.18	275
Gill et al. (1994)	ODP Leg 126, 793B	793B-20R-4--91-9S	793B-20R-4--91-9S	Izu volcanic arc	31.1059	140.888	Volcaniclastic		25	55.55	2.94	0.98	9.11497	0.82	3.66	7.03	0.19	16.83	0.1		97.215		11	760	16	56	1.9	0.19	290	6.52	14	1.97	9.12	2.46	0.79	2.83	0.45	3.12	0.65	2	0.29	1.73	0.28	1.59	0.14	3.2	1	0.32	290
Gill et al. (1994)	ODP Leg 126, 787B	787B--14R-3--72-76	787B--14R-3--72-76	Izu volcanic arc	32.3757	140.749	Volcaniclastic		26.8	51.32	3.65	0.73	10.4917	0.83	8.25	4.73	0.33	17.45	0.09		97.8717		7.3	148	17	42	0.7	0.18	65	4.09	10.3	1.61	8.3	2.36	0.86	2.96	0.45	2.94	0.61	1.84	0.27	1.75	0.27	1.17	0.3	2	0.47	0.31	138.298
Gill et al. (1994)	ODP Leg 126, 787B	787B--15R-4--26-29	787B--15R-4--26-29	Izu volcanic arc	32.3757	140.749	Volcaniclastic		27.2	54.93	5.31	1.98	7.47734	0.92	4.28	4.35	0.15	18.89	0.02		98.3073		19	158	16	67	0.9		192	2.37	6.87	1.15	5.57	2.09	0.78	2.63	0.5	3.85	0.81	2.6	0.4	2.73	0.36	2.08	0.07	5.6	0.62	0.23	309.677
Gill et al. (1994)	ODP Leg 126, 792E	792E-33R-1-105-108	792E-33R-1-105-108	Izu volcanic arc	32.3994	140.418	Volcaniclastic		27.4	54.95	4.99	1.9	6.01066	0.78	4.86	4.62	0.18	19.39	0		97.6807		21	132	12	56	0.8		472	1.74	4.58	0.79	3.74	1.36	0.53	1.81	0.35	2.72	0.63	2.1	0.34	2.36	0.34	1.8	0.05	4.2	0.97	0.56	486.598
Gill et al. (1994)	ODP Leg 126, 793B	793B-26R-5-125-129	793B-26R-5-125-129	Izu volcanic arc	31.1059	140.888	Volcaniclastic		27.8	51.51	4.23	0.55	9.13297	0.69	7.97	6.36	0.22	17.74	0.08		98.483		10	75	13	36	1.1	0.57	128	5.01	10.6	1.5	6.85	1.89	0.63	2.3	0.39	2.52	0.52	1.51	0.22	1.5	0.23	1.13	0.11	1.8	0.56	0.25	228.571
Gill et al. (1994)	ODP Leg 126, 787B	787B-21R-I-65-69	787B-21R-I-65-69	Izu volcanic arc	32.3757	140.749	Volcaniclastic		27.9	52.02	2.36	0.51	8.47612	0.63	5.32	11.18	0.18	18.15	0.06		98.8861		4.6	302	14	47	0.6		45	2.46	6.52	1.1	5.49	1.88	0.66	2.29	0.43	2.66	0.58	1.81	0.27	1.73	0.28	1.46	0.11	2.5	0.62	0.14	72.5806
Gill et al. (1994)	ODP Leg 126, 787B	787B-23R-4-18-21	787B-23R-4-18-21	Izu volcanic arc	32.3757	140.749	Volcaniclastic		28	53.04	2.65	0.7	8.5391	0.69	5.21	9.56	0.21	17.93	0.08		98.6091		5.6	267	16	50	0.7		49	3.24	8.54	1.42	7.41	2.23	0.81	2.82	0.49	3.23	0.69	2.03	0.32	2.04	0.3	1.41	0.07	2.1	0.35	0.14	140
Gill et al. (1994)	ODP Leg 126, 792E	792E-42R-6-80-83	792E-42R-6-80-83	Izu volcanic arc	32.3994	140.418	Volcaniclastic		28.4	54.02	1.93	0.8	8.04421	0.72	5.54	8.18	0.18	18.05	0.06		97.5242		4.5	225	13	59	0.8	0.02	44	2.84	7.86	1.27	6.38	1.95	0.73	2.46	0.42	2.76	0.58	1.71	0.28	1.73	0.25	1.62	0.11	1.9	0.48	0.18	91.6667
Gill et al. (1994)	ODP Leg 126, 792E	792E-47R-2-88-93	792E-47R-2-88-93	Izu volcanic arc	32.3994	140.418	Volcaniclastic		28.7	52.22	3.92	0.66	8.80904	0.7	8.98	5.97	0.31	16.55	0.03		98.149		8.3	111	20	48	0.65		50	3.43	8.21	1.36	6.9	2.16	0.75	3.02	0.51	3.45	0.77	2.22	0.32	2.05	0.35	1.47	0.05	2.1	0.31	0.18	161.29
Gill et al. (1994)	ODP Leg 126, 793B	793B-36R-6-103-107	793B-36R-6-103-107	Izu volcanic arc	31.1059	140.888	Volcaniclastic		28.85	53.9	5	0.45	7.71129	0.66	3.78	7.68	0.18	18.26	0.1		97.7213		6.9	216	16	47	0.7	1.7	213	3.59	9.06	1.39	6.98	1.99	0.79	2.65	0.46	3.08	0.64	1.87	0.28	1.8	0.28	1.23	0.1	2.6	0.45	0.18	473.333
Gill et al. (1994)	ODP Leg 126, 792E	792E-56R-1-36-39	792E-56R-1-36-39	Izu volcanic arc	32.3994	140.418	Volcaniclastic		28.92	52.74	1.63	0.17	8.37714	0.65	7.55	10.7	0.16	17.07	0.05		99.0971		2.1	231	16	43	0.5		26	2.94	7.43	1.25	6.31	1.87	0.68	2.65	0.43	2.84	0.62	1.85	0.28	1.85	0.3	1.27	0.05	1.6	0.26	0.11	100
Gill et al. (1994)	ODP Leg 126, 793B	793B-51R-5-6-9	793B-51R-5-6-9	Izu volcanic arc	31.1059	140.888	Volcaniclastic		29.6	52.35	3.13	1.09	8.69207	0.52	10.32	6.78	0.25	14.82	0.06		98.0121		21	216	15	35	0.4		129	2.32	5.85	1	5.09	1.68	0.65	2.45	0.4	2.7	0.56	1.87	0.27	1.8	0.27	1.04	0.04	2.7	0.28	0.13	460.714
Gill et al. (1994)	ODP Leg 126, 793B	793B-54R-3-103-107	793B-54R-3-103-107	Izu volcanic arc	31.1059	140.888	Volcaniclastic		29.7	53.34	1.45	0.32	9.08798	0.47	7.22	10.56	0.18	15.49	0.06		98.178		2.8	197	11	30	0.4	0.02	43	1.71	3.79	0.63	3.18	1.23	0.47	1.67	0.32	2.24	0.47	1.4	0.22	1.47	0.22	0.85	0.09	2.3	0.22	0.09	195.455
Gill et al. (1994)	ODP Leg 126, 792E	792E-65R-1-111-116	792E-65R-1-111-116	Izu volcanic arc	32.3994	140.418	Volcaniclastic		30.1	53.55	2.52	1.08	7.69329	0.66	7.62	4.44	0.13	20.55	0.11		98.3533		20	211	18	47	0.8		78	4.44	10.7	1.91	8.78	2.68	1.05	3.23	0.54	3.28	0.77	2.22	0.38	2.05	0.38	1.42	0.11	1.5	2.48	0.14	31.4516
Samples in blue could come from the Izu rear-arc and are examined with cautions.
[truncated: 5 more columns]

## Sheet: bulk rocks
Table S1-3: Major element, trace element and Sr-Hf-Nd-Pb radiogenic isotopes of the Izu infant arc magmas of Ishizuka et al. (2020)
References	Sample number	Sample type	Location	Locality	Material	Age (Ma)	SiO2	TiO2	Al2O3	FeOT	MnO	MgO	CaO	Na2O	K2O	P2O5	Total	LOI	Cs	Rb	Ba	Sr	Pb	Th	U	Nb	Ta	La	Ce	Pr	Nd	Zr	Hf	Sm	Eu	Gd	Tb	Dy	Ho	Er	Tm	Yb	Lu	Y	Cs/Th	Cs/Ba	Rb/Th	Ba/Th	87Sr/86Sr
Ishizuka et al. (2020)	780/127	volcanic rock	infant arc	Hahajima	bulk rock		51.76	0.58	16.15	9.84	0.18	8.12	10.78	1.91	0.34	0.04	99.7	0.02	0.11	3.87	30.58	180.2	1.13	0.14	0.07	0.74	0.25	1.69	4.89	0.75	4.06	35.21	0.92	1.3	0.54	1.74	0.32	2.17	0.49	1.42	0.2	1.42	0.22	12.96	0.77		27.73	218.429	0.70342
Ishizuka et al. (2020)	780/119	volcanic rock	infant arc	Hahajima	bulk rock		52.03	0.85	18.67	9.9	0.17	4.96	10.68	2.49	0.29	0.09	100.14	0.15	0.12	2.83	36.58	272.71	1.09	0.22	0.1	1.81	0.18	2.74	8.11	1.25	6.61	55.02	1.36	2.05	0.78	2.51	0.46	2.99	0.66	1.92	0.26	1.86	0.3	17.76	0.54		12.76	166.273	0.70375
Ishizuka et al. (2020)	780/31	volcanic rock	infant arc	Hahajima	bulk rock		52.06	0.62	17.24	9.6	0.17	6.57	10.83	2.15	0.35	0.05	99.64	0.58	0.12	4.08	34.32	189.77	1.23	0.16	0.08	0.85	0.3	1.88	5.37	0.82	4.42	44.27	1.09	1.45	0.58	1.84	0.35	2.33	0.52	1.52	0.22	1.51	0.24	14.72	0.77		25.83	214.5	0.70342
Ishizuka et al. (2020)	780/129	volcanic rock	infant arc	Hahajima	bulk rock		52.13	0.61	16.7	9.74	0.17	7.04	10.72	2.06	0.19	0.05	99.41	0.25	0.06	2.28	29.47	200.84	0.94	0.15	0.07	0.79	0.12	1.75	5.1	0.78	4.17	33.73	0.84	1.39	0.57	1.78	0.33	2.25	0.51	1.45	0.21	1.45	0.23	14.24	0.36		15.02	196.467	0.70342
Ishizuka et al. (2020)	780/115	volcanic rock	infant arc	Hahajima	bulk rock		55.96	1	17.06	10.03	0.21	3.76	8.09	3.34	0.38	0.1	99.93	0.27	0.28	7.58	44.3	212.66	1.28	0.2	0.1	2.56	0.28	3.1	9.75	1.5	8.24	72.06	1.82	2.6	1.01	3.31	0.61	4.03	0.9	2.62	0.37	2.55	0.4	23.71	1.38	0.01	37.07	221.5	0.70363
Ishizuka et al. (2020)	07112104-1	volcanic rock	infant arc	Hahajima	bulk rock	45.28	58.32	0.78	15.83	7.64	0.12	4.21	7.94	3.16	0.64	0.13	98.76		0.01	9.21	135.39	266.22	2.12	0.99	0.4	2.88	0.19	7.22	17.41	2.33	11.19	115.63	2.99	3.03	0.89	3.41	0.62	3.93	0.89	2.55	0.42	2.71	0.41	27.75	0.01		9.29	136.758	0.70349
Ishizuka et al. (2020)	13032914-2	volcanic rock	infant arc	Hahajima	bulk rock		56.32	0.71	15.17	7.98	0.15	5.28	8.87	2.89	0.66	0.11	98.13		2.03	20.94	79.75	234.08	1.46	0.64	0.28	2.9	0.2	5.78	14.26	1.91	9.6	104.73	2.76	2.74	0.88	3.26	0.6	3.87	0.85	2.52	0.4	2.6	0.4	26.4	3.19	0.03	32.88	124.609
Ishizuka et al. (2020)	10093005-4	volcanic rock	infant arc	Hahajima	bulk rock	42.66	54.73	0.86	19.83	7.75	0.17	2.68	8.89	3.76	0.43	0.17	99.26		0.07	2.32	64.23	296.41	1.1	0.4	0.74	2.55	0.17	4.92	12.87	1.81	9.15	87.5	2.3	2.81	1.09	3.62	0.67	4.33	0.95	2.74	0.42	2.83	0.42	30.1	0.16		5.76	160.575
Ishizuka et al. (2020)	10093005-5	volcanic rock	infant arc	Hahajima	bulk rock	42.66	50.46	0.63	15.68	9.12	0.16	8.6	11.79	2.03	0.31	0.1	98.87		0.1	4.71	49.43	245.26	0.9	0.29	0.12	1.27	0.09	3.34	8.39	1.19	5.96	42.83	1.21	1.89	0.71	2.27	0.43	2.68	0.59	1.77	0.26	1.73	0.27	17.92	0.35		16.38	170.448	0.70324
Ishizuka et al. (2020)	13032706	volcanic rock	infant arc	Hahajima	bulk rock		52.82	0.74	18.27	8.6	0.17	5.11	10.22	2.49	0.5	0.12	99.04		0.13	6.75	61.9	272.5	1.08	0.36	0.17	1.64	0.12	4.2	10.26	1.38	7.2	62.75	1.75	2.25	0.82	2.78	0.5	3.25	0.71	2.17	0.34	2.07	0.32	22.11	0.37		18.5	171.944	0.70336
Ishizuka et al. (2020)	10093001-1	volcanic rock	infant arc	Hahajima	bulk rock	42.66	54.89	0.72	16.06	8.3	0.14	5.54	10.11	2.55	0.61	0.1	99		0.22	9.69	67.58	203	1.24	0.52	0.27	2.26	0.17	5.01	12.07	1.77	8.97	84.4	2.23	2.61	0.85	3.26	0.6	3.9	0.86	2.56	0.38	2.59	0.41	26.2	0.43		18.74	129.962
Ishizuka et al. (2020)	10093001-3	volcanic rock	infant arc	Hahajima	bulk rock	42.66	55.07	0.71	16.06	8.03	0.13	5.29	9.45	2.6	0.63	0.08	98.04		0.22	10	66.05	200.73	1.32	0.57	0.23	2.56	0.18	4.52	12.04	1.59	7.8	91.53	2.35	2.36	0.78	2.83	0.52	3.32	0.73	2.13	0.33	2.22	0.34	21.51	0.4		17.65	115.877
Ishizuka et al. (2020)	10093001-4	volcanic rock	infant arc	Hahajima	bulk rock	42.66	55	0.71	16.08	8.02	0.13	5.3	9.37	2.64	0.63	0.08	97.96		0.22	9.94	64.64	205	1.45	0.59	0.23	2.61	0.19	6.47	18.1	2.24	11.02	94.66	2.51	3.02	0.98	3.61	0.62	3.9	0.81	2.44	0.36	2.32	0.37	24.52	0.38		16.92	109.559
Ishizuka et al. (2020)	10093001-5	volcanic rock	infant arc	Hahajima	bulk rock	42.66	50.99	0.7	16.39	8.48	0.14	7.33	12.48	2.17	0.36	0.08	99.1		0.08	5.5	42.21	210.35	0.59	0.22	0.1	1.12	0.08	2.68	6.45	1.08	5.76	35.69	1.11	1.89	0.73	2.51	0.44	2.94	0.63	1.8	0.26	1.71	0.26	18.21	0.37		24.67	191.864
Ishizuka et al. (2020)	10093003-1	volcanic rock	infant arc	Hahajima	bulk rock	42.66	51.94	0.71	17.66	8.68	0.14	5.54	11.93	2.13	0.34	0.14	99.22		0.13	4.73	36.89	213.92	0.81	0.24	0.29	1.36	0.12	4.72	11.58	1.86	9.51	48.24	1.31	2.96	1.07	3.82	0.65	4.12	0.87	2.51	0.35	2.23	0.36	29.36	0.54		19.51	153.708
Ishizuka et al. (2020)	10093003-2	volcanic rock	infant arc	Hahajima	bulk rock	42.66	51.69	0.71	17.52	8.46	0.14	5.82	12.07	2.09	0.26	0.09	98.85		0.06	3.31	32.17	208.81	0.91	0.29	0.28	1.42	0.11	3.81	9.49	1.61	8.59	48.54	1.42	2.77	0.97	3.61	0.62	3.9	0.83	2.33	0.33	2.11	0.34	25.78	0.21		11.51	110.931
Ishizuka et al. (2020)	10093003-3	volcanic rock	infant arc	Hahajima	bulk rock	42.66	51.32	0.67	16.52	8.57	0.14	7.06	12.2	1.99	0.32	0.07	98.84		0.14	3.82	30.63	191.67	0.7	0.18	0.12	1.14	0.08	2.4	6.34	0.92	4.84	40.06	1.1	1.69	0.66	2.27	0.4	2.67	0.6	1.73	0.26	1.67	0.26	18.01	0.77		21.02	170.167
Ishizuka et al. (2020)	10093003-4	volcanic rock	infant arc	Hahajima	bulk rock	42.66	50.89	0.68	17.23	8.38	0.15	6.28	12.9	1.97	0.29	0.09	98.86		0.11	3.81	29.13	202.7	0.49	0.17	0.35	1.06	0.07	2.36	6.25	0.9	4.69	37.94	1.04	1.62	0.66	2.01	0.4	2.64	0.57	1.72	0.25	1.62	0.25	18.03	0.65		21.87	171.353
Ishizuka et al. (2020)	10093003-5	volcanic rock	infant arc	Hahajima	bulk rock	42.66	51.21	0.68	16.85	8.44	0.15	6.2	12.54	2.03	0.34	0.1	98.54		0.12	4.27	34.41	204.74	0.75	0.21	0.67	1.26	0.09	2.99	7.52	1.03	5.49	44.54	1.17	1.68	0.67	2.3	0.42	2.83	0.63	1.85	0.27	1.8	0.28	21.51	0.57		20.53	163.857
Ishizuka et al. (2020)	12070403	volcanic rock	infant arc	Hahajima	bulk rock		54.24	0.82	16.91	9.08	0.16	4.92	8.83	2.7	0.69	0.12	98.47		0.16	8.21	65.09	223.32	1.17	0.49	0.18	2.49	0.17	4.56	11.06	1.69	8.53	69.23	1.96	2.54	0.88	3.14	0.56	3.62	0.79	2.36	0.35	2.34	0.37	23.42	0.32		16.67	132.837	0.70348
Ishizuka et al. (2020)	13032606	volcanic rock	infant arc	Hahajima	bulk rock		54.5	0.77	17.02	8.97	0.15	4.73	9.06	2.94	0.38	0.14	98.66		0.07	3.37	55.53	232.47	1.34	0.34	0.22	1.97	0.14	4.28	10.73	1.46	7.82	71.01	1.78	2.26	0.76	2.92	0.5	3.36	0.73	2.19	0.33	2.24	0.34	23.54	0.2		9.99	163.324
Ishizuka et al. (2020)	13032608	volcanic rock	infant arc	Hahajima	bulk rock		53.03	0.69	19.49	8.39	0.14	3.93	10.27	2.68	0.61	0.09	99.31		0.18	7.2	45.37	226.2	1.05	0.31	0.17	1.18	0.09	3.17	7.65	1.17	6.07	44.06	1.34	1.86	0.72	2.39	0.42	2.76	0.62	1.8	0.28	1.81	0.28	18.01	0.56		22.91	146.355
Ishizuka et al. (2020)	12070303	volcanic rock	infant arc	Hahajima	bulk rock		55.92	0.72	17.04	8.08	0.12	4.09	8.64	3.15	0.83	0.13	98.7		0.07	11.94	81.66	242.06	1.22	0.48	0.21	2.08	0.15	4.76	11.78	1.62	8.15	74.43	1.98	2.36	0.78	2.86	0.51	3.22	0.72	2.14	0.32	2.08	0.34	22.75	0.15		24.8	170.125	0.70342
Ishizuka et al. (2020)	12070504	volcanic rock	infant arc	Hahajima	bulk rock		56.22	0.71	16.04	8.17	0.14	4.82	8.68	2.96	0.88	0.13	98.75		0.13	14.74	78.75	217.1	1.19	0.51	0.21	2.35	0.17	5.08	12.5	1.69	8.68	82.97	2.27	2.44	0.82	2.83	0.56	3.66	0.81	2.34	0.36	2.38	0.37	24.93	0.26		29.16	154.412
Ishizuka et al. (2020)	12070505	volcanic rock	infant arc	Hahajima	bulk rock		56.3	0.73	16.04	8.11	0.13	4.82	8.7	2.95	0.9	0.13	98.81		0.14	14.86	79.47	210.93	1.07	0.49	0.21	2.3	0.16	4.84	12.16	1.63	8.48	79.5	2.12	2.51	0.83	2.94	0.54	3.49	0.77	2.28	0.35	2.24	0.36	23.93	0.28		30.11	162.184
Ishizuka et al. (2020)	12070406	volcanic rock	infant arc	Hahajima	bulk rock		54.29	0.75	16.83	9.01	0.16	5.13	9.63	2.56	0.65	0.11	99.1		0.16	7.83	60.18	236.44	1.05	0.33	0.16	1.87	0.12	4.17	10.14	1.44	7.3	61.89	1.59	2.03	0.77	2.5	0.48	3.14	0.71	2.04	0.31	2.12	0.32	23.3	0.49		23.79	182.364
Ishizuka et al. (2020)	12070412	volcanic rock	infant arc	Hahajima	bulk rock		55.02	0.75	18.01	8.67	0.15	4.4	8.8	2.79	0.53	0.08	99.2		0.14	6.2	46.7	207.2	1.06	0.26	0.13	1.09	0.08	3.27	6.81	1.2	6.43	48.25	1.41	2.03	0.8	2.86	0.51	3.35	0.75	2.16	0.32	2.05	0.33	24.62	0.55		23.73	179.615	0.70347
Ishizuka et al. (2020)	12070507	volcanic rock	infant arc	Hahajima	bulk rock		56.49	0.68	16.31	7.99	0.14	4.89	8.67	2.74	0.88	0.11	98.89		0.23	10.83	79.85	212.54	1.36	0.53	0.22	2.31	0.17	4.93	11.98	1.63	8.06	83.48	2.16	2.47	0.8	2.82	0.53	3.39	0.76	2.23	0.35	2.34	0.37	23.3	0.44		20.46	150.66
Ishizuka et al. (2020)	12070601	volcanic rock	infant arc	Hahajima	bulk rock		59.4	0.7	15.88	7.4	0.14	4.07	7.32	3.17	0.98	0.14	99.21		0.33	14.87	107.64	223.56	1.81	0.8	0.37	3.08	0.22	6.83	15.68	2.08	10.1	112.06	2.81	2.94	0.9	3.82	0.66	4.16	0.96	2.86	0.43	3.05	0.49	30.72	0.42		18.6	134.55
Ishizuka et al. (2020)	13032603	volcanic rock	infant arc	Hahajima	bulk rock		54.26	0.74	16.89	9.08	0.15	5.11	9.74	2.57	0.59	0.16	99.3		0.15	7.09	57.35	224.93	1.11	0.33	0.15	1.85	0.13	4.58	10.69	1.51	7.99	64.68	1.71	2.36	0.81	3.01	0.54	3.67	0.81	2.5	0.35	2.47	0.39	27.53	0.46		21.23	173.788
Ishizuka et al. (2020)	13032708	volcanic rock	infant arc	Hahajima	bulk rock		50.81	0.64	15.48	9.48	0.16	8.93	11.49	1.82	0.33	0.07	99.2		0.09	3.83	27.02	192.59	0.6	0.16	0.08	0.76	0.06	2.2	5.9	0.82	4.45	35.09	0.96	1.5	0.56	2.11	0.38	2.3	0.52	1.5	0.22	1.53	0.22	16.43	0.56		23.69	168.875	0.70345
Ishizuka et al. (2020)	13032902	volcanic rock	infant arc	Hahajima	bulk rock		53.31	0.68	18.94	8.45	0.14	4.87	9.83	2.53	0.6	0.12	99.47		0.17	8.69	68.52	301	1.14	0.45	0.3	1.76	0.11	4.18	10.69	1.32	6.73	58.74	1.58	2.13	0.71	2.42	0.44	2.94	0.68	1.85	0.28	1.94	0.3	19.65	0.36		19.11	152.267
Ishizuka et al. (2020)	13032903	volcanic rock	infant arc	Hahajima	bulk rock		55.54	0.71	18.92	7.51	0.14	3.34	8.36	3.1	0.92	0.15	98.69		0.22	10.99	79.34	291.07	1.3	0.51	0.24	2.77	0.18	6.09	14.82	2.04	10.18	83.2	2.26	2.87	0.97	3.41	0.63	4.03	0.9	2.71	0.39	2.74	0.41	26.91	0.44		21.56	155.569
Ishizuka et al. (2020)	05121801A	volcanic rock	infant arc	Hahajima	bulk rock	40.2	56.49	0.67	15.53	8.24	0.14	5.14	8.7	2.87	0.78	0.11	98.66		0.26	10.82	80.45	206.68	1.36	0.88	0.26	2.54	0.16	5.27	12.69	1.63	8.32	78.21	2.11	2.47	0.77	3.27	0.57	3.57	0.81	2.5	0.38	2.42	0.38	27.54	0.29		12.23	91.4205
Ishizuka et al. (2020)	07032729-2	volcanic rock	infant arc	Hahajima	bulk rock		54.63	0.77	17.44	8.94	0.15	4.6	9.02	2.91	0.7	0.13	99.29		0.19	7.83	55.55	228.25	1.26	0.36	0.16	1.97	0.14	4.29	10.79	1.51	7.81	65.7	1.78	2.33	0.81	2.84	0.53	3.41	0.78	2.31	0.37	2.31	0.36	23.54	0.53		22	154.306
Ishizuka et al. (2020)	13032502	volcanic rock	infant arc	Hahajima	bulk rock		56.38	0.72	15.87	8.66	0.15	5.04	8.65	2.89	0.7	0.12	99.16		0.22	10.04	74.01	212.83	1.36	0.46	0.19	2.09	0.14	4.42	11.42	1.56	7.93	75.64	2.1	2.25	0.85	2.81	0.53	3.49	0.73	2.26	0.38	2.4	0.38	22.79	0.48		22.05	160.891
Ishizuka et al. (2020)	5121804	volcanic rock	infant arc	Hahajima	bulk rock		52.24	0.58	14.54	9.15	0.16	8.29	10.59	2.07	0.31	0.08	98.01		0.16	4.01	22.08	162.15	0.68	0.38	0.1	1.02	0.09	2.16	5.58	0.88	5.02	35.42	1.41	1.78	0.66	2.54	0.45	2.84	0.64	1.92	0.29	1.87	0.29	17.5	0.43	0.01	10.53	58.1053
Ishizuka et al. (2020)	10093002	volcanic rock	infant arc	Hahajima	bulk rock		56.21	0.82	17.76	8.46	0.15	3.17	8.2	3.33	0.86	0.17	99.12		0.22	10.47	76.36	234.5	1.46	0.59	0.24	3.35	0.23	7	17.01	2.37	11.62	116.45	3.01	3.36	1.12	4.04	0.75	4.87	1.08	3.24	0.49	3.24	0.49	33.92	0.38		17.65	129.424	0.70344
Ishizuka et al. (2020)	13032506	volcanic rock	infant arc	Hahajima	bulk rock		51.87	0.58	14.76	9.04	0.16	9.06	10.31	2.14	0.14	0.07	98.14		0.06	2.87	19.6	149.89	0.76	0.2	0.08	0.89	0.07	2.12	5.51	0.9	4.9	35.93	1.14	1.56	0.59	2.12	0.38	2.56	0.57	1.67	0.25	1.69	0.27	16.88	0.31		14.21	98
Ishizuka et al. (2020)	7032835	volcanic rock	infant arc	Hahajima	bulk rock		56.54	0.72	17.6	8.73	0.15	3.73	8.07	2.96	0.61	0.09	99.2		0.17	6.08	45.64	202.36	0.91	0.26	0.11	1.19	0.11	3.16	8.63	1.27	7.02	54.05	1.61	2.31	0.87	2.86	0.56	3.55	0.78	2.24	0.38	2.34	0.38	23.32	0.66		23.81	175.538	0.7035
Ishizuka et al. (2020)	07032836-1	volcanic rock	infant arc	Hahajima	bulk rock		55.74	0.53	15	8.59	0.15	6.85	9.56	2.37	0.52	0.08	99.39		0.19	6.3	42.01	162.66	0.89	0.25	0.13	1.11	0.11	2.68	7.1	0.98	5.38	50.05	1.54	1.77	0.63	2.32	0.43	2.7	0.61	1.88	0.29	1.85	0.29	18.21	0.75		24.76	168.04	0.70349
Ishizuka et al. (2020)	07032836-2	volcanic rock	infant arc	Hahajima	bulk rock		55.83	0.57	14.88	8.64	0.17	6.95	9.72	2.44	0.45	0.07	99.72		0.17	6.21	43.11	157.23	1.07	0.3	0.13	1.25	0.1	2.93	7.38	1.13	5.91	51.22	1.53	1.82	0.64	2.41	0.43	2.86	0.63	1.88	0.29	1.92	0.3	19.1	0.56		20.46	143.7
Ishizuka et al. (2020)	07032836-3	volcanic rock	infant arc	Hahajima	bulk rock		54.87	0.53	15.28	8.36	0.16	6.74	9.59	2.39	0.48	0.07	98.48		0.19	6.58	43.89	175.84	0.89	0.27	0.11	1.12	0.08	2.93	7.35	1.08	5.49	54.96	1.46	1.79	0.65	2.1	0.42	2.82	0.63	1.87	0.31	1.85	0.3	19.52	0.69		24.19	162.556
Ishizuka et al. (2020)	12070211	volcanic rock	infant arc	Hahajima	bulk rock		55.74	0.7	16.02	8.39	0.15	5.36	8.99	2.77	0.69	0.11	98.91		0.21	9.32	74.82	221.74	1.21	0.43	0.18	1.85	0.14	4.7	11.33	1.55	7.54	77.63	1.89	2.27	0.71	2.79	0.5	3.25	0.73	2.2	0.32	2.19	0.34	24.6	0.47		21.54	174	0.70347
Ishizuka et al. (2020)	07032834-1	volcanic rock	infant arc	Hahajima	bulk rock		51.6	0.72	15.37	9.24	0.15	8.5	10.38	2.32	0.36	0.09	98.74		0.35	11.73	44.84	233.73	1.01	0.4	0.18	1.55	0.14	5.19	10.48	1.61	8.36	56.68	1.69	2.51	0.92	3.05	0.56	3.54	0.8	2.44	0.36	2.17	0.36	30.17	0.87	0.01	29.05	112.1	0.70323
Ishizuka et al. (2020)	07032836-5	volcanic rock	infant arc	Hahajima	bulk rock		57.62	0.64	15.8	7.76	0.15	5.07	8.7	2.89	0.56	0.08	99.28		0.19	7.18	60.52	201.89	1.38	0.5	0.15	1.61	0.12	3.76	9.97	1.35	7	71.43	2.02	2.1	0.75	2.69	0.52	3.17	0.75	2.22	0.34	2.23	0.38	21.77	0.38		14.41	121.04
Ishizuka et al. (2020)	07032836-6	volcanic rock	infant arc	Hahajima	bulk rock		56.91	0.66	16.19	7.92	0.14	4.9	9.33	2.91	0.57	0.12	99.66		0.21	7.97	67.55	204.58	1.13	0.37	0.24	1.49	0.14	4.16	10.54	1.51	7.92	68.43	1.94	2.51	0.88	2.86	0.59	3.61	0.86	2.53	0.38	2.49	0.41	26.58	0.57		21.67	182.568
Ishizuka et al. (2020)	10092709	volcanic rock	infant arc	Mukoujima	bulk rock		55.51	0.62	15	8.14	0.14	5.95	9.68	2.48	0.74	0.09	98.34		0.22	9.97	71.43	204.68	1.24	0.53	0.22	1.67	0.14	4.25	9.89	1.33	6.53	68.63	1.82	1.87	0.72	2.37	0.43	2.85	0.61	1.91	0.29	1.94	0.31	20.27	0.42		18.79	134.774
Ishizuka et al. (2020)	10092805-1	volcanic rock	infant arc	Mukoujima	bulk rock		55.71	0.71	15.39	8.45	0.15	5.59	8.81	2.78	0.77	0.13	98.47		0.19	9.76	67.2	208.74	1.36	0.48	0.2	2.34	0.15	4.67	11.63	1.62	7.69	78.21	1.96	2.3	0.79	2.82	0.51	3.45	0.75	2.25	0.33	2.25	0.36	24.23	0.4		20.53	140	0.70346
Ishizuka et al. (2020)	10092805-2	volcanic rock	infant arc	Mukoujima	bulk rock		50.64	0.67	15.8	10.07	0.15	6.77	11.03	2.19	0.34	0.09	97.73		0.15	6.55	33.09	213.85	0.54	0.14	0.08	0.92	0.07	2.21	5.24	0.86	4.68	31.97	0.88	1.65	0.68	2.58	0.51	3.58	0.85	2.72	0.42	2.9	0.48	30.61	1.09		47.46	236.357
Ishizuka et al. (2020)	10092806-1	volcanic rock	infant arc	Mukoujima	bulk rock		55.46	0.62	15.15	8.22	0.14	6.27	9.66	2.47	0.8	0.09	98.88		0.19	9.65	66.49	188.76	1.16	0.5	0.2	1.66	0.13	4.24	10.08	1.31	6.09	70.03	1.71	1.74	0.65	2.07	0.4	2.72	0.58	1.76	0.26	1.78	0.28	18.77	0.37		19.13	132.98	0.70345
Ishizuka et al. (2020)	10092806-2	volcanic rock	infant arc	Mukoujima	bulk rock		55.41	0.62	15.07	8.28	0.14	6.02	9.58	2.53	0.71	0.08	98.43		0.2	9.61	66.13	181.29	1.18	0.51	0.2	1.61	0.12	4.36	10.05	1.34	6.46	69.41	1.71	1.82	0.65	2.28	0.42	2.85	0.63	1.87	0.28	1.84	0.29	21.48	0.39		18.89	129.667
Ishizuka et al. (2020)	07033045-1	volcanic rock	infant arc	Katsuodorijima	bulk rock		54.46	0.53	14.83	8.8	0.15	7.23	9.78	2.33	0.47	0.07	98.65		0.18	6.07	34.25	160.4	0.84	0.23	0.11	1.02	0.1	2.48	6.64	0.96	4.88	49.34	1.36	1.62	0.61	1.98	0.39	2.53	0.54	1.77	0.27	1.71	0.28	17.32	0.78	0.01	26.45	148.913
Ishizuka et al. (2020)	07033045-2	volcanic rock	infant arc	Katsuodorijima	bulk rock
Ishizuka et al. (2020)	07033049-1	volcanic rock	infant arc	Hirashima	bulk rock		52.4	0.78	16.43	9.84	0.16	5.54	10.61	2.48	0.5	0.18	98.91		0.12	5.25	38.61	227.81	0.92	0.42	0.13	1.63	0.12	3.97	9.28	1.35	7	52.41	1.46	2.19	0.79	2.84	0.5	3.38	0.74	2.24	0.32	2.18	0.35	21.89	0.28		12.57	91.9286
Ishizuka et al. (2020)	07033049-3	volcanic rock	infant arc	Hirashima	bulk rock		51.65	0.77	16.51	9.88	0.15	5.6	10.68	2.45	0.45	0.19	98.33		0.13	4.94	34.44	217.39	0.83	0.3	0.14	1.6	0.13	3.65	8.92	1.23	6.69	54.41	1.55	2.13	0.79	2.74	0.48	3.37	0.71	2.11	0.33	2.06	0.33	22.22	0.43		16.55	114.8	0.7035
Ishizuka et al. (2020)	07033050-1	volcanic rock	infant arc	Hirashima	bulk rock		52.18	0.62	15.6	9.06	0.12	7.71	10.3	2.28	0.22	0.08	98.17		0.06	1.74	32.13	182.44	0.81	0.16	0.09	1.08	0.1	2.18	5.97	0.84	4.61	39.78	1.12	1.56	0.64	2.04	0.4	2.53	0.59	1.69	0.27	1.7	0.28	17.19	0.37		11.2	200.812	0.70353
Ishizuka et al. (2020)	07112202-1	volcanic rock	infant arc	Anejima	bulk rock		50.47	0.57	15.01	9.35	0.16	9.27	11.41	2.18	0.26	0.21	98.89		0.07	3.15	15.87	173.66	0.93	0.16	0.11	0.76	0.05	2.37	5.58	0.96	5.01	40.42	1.09	1.6	0.62	2.2	0.42	2.88	0.62	1.87	0.3	1.85	0.3	20.78	0.46		19.38	99.1875	0.7035
Ishizuka et al. (2020)	10092801-1	volcanic rock	infant arc	Anejima	bulk rock		51.26	0.78	18.33	10.13	0.17	4.9	9.92	2.19	0.34	0.05	98.07		0.13	3.26	20.86	199.7	1.04	0.07	0.05	0.6	0.05	1.08	3.51	0.55	3.42	29.38	0.89	1.36	0.6	1.95	0.37	2.52	0.55	1.6	0.25	1.69	0.25	16.91	1.82	0.01	44.51	298
Ishizuka et al. (2020)	10092802-1	volcanic rock	infant arc	Anejima	bulk rock		51.94	0.77	18.34	9.91	0.17	5.13	10.01	2.43	0.32	0.06	99.07		0.13	3.69	27.09	186.55	1.18	0.08	0.07	0.69	0.05	1.38	3.98	0.69	4.01	28.76	0.95	1.47	0.64	2.14	0.39	2.66	0.59	1.75	0.26	1.77	0.28	17.27	1.57		43.75	338.625	0.7035
Ishizuka et al. (2020)	10092802-2	volcanic rock	infant arc	Anejima	bulk rock		51.63	0.78	18.22	10.11	0.17	5.2	9.66	2.37	0.38	0.05	98.55		0.12	3.83	20.47	178.15	1.12	0.08	0.05	0.7	0.05	1.25	3.88	0.66	3.93	29.12	0.95	1.46	0.61	2.06	0.39	2.6	0.58	1.7	0.26	1.71	0.27	16.66	1.43	0.01	45.62	255.875
Ishizuka et al. (2020)	5122101	volcanic rock	infant arc	Imoutojima	bulk rock		52.78	0.74	15	9.27	0.19	6.53	10.19	2.78	0.39	0.27	98.12
Ishizuka et al. (2020)	07032941-1	volcanic rock	infant arc	Imoutojima	bulk rock		50.98	0.74	14.82	10.36	0.16	8.34	11.02	2.2	0.33	0.08	99.03		0.12	4.18	20.88	159.63	0.66	0.14	0.1	0.88	0.08	1.91	5.8	0.84	4.72	40.41	1.21	1.81	0.69	2.31	0.47	3.19	0.71	2.03	0.32	2.07	0.31	21.58	0.87	0.01	30.01	149.143	0.7035
Ishizuka et al. (2020)	07032941-3	volcanic rock	infant arc	Imoutojima	bulk rock	39.8	48.74	0.76	15.56	10.02	0.17	8.19	12.19	2.09	0.25	0.1	98.05		0.11	3.96	14.74	166.76	0.7	0.15	0.11	0.97	0.06	2.05	6.33	1.07	5.54	45.26	1.32	2.02	0.72	2.54	0.51	3.52	0.78	2.34	0.36	2.22	0.35	22.8	0.76	0.01	26.87	98.2667
Ishizuka et al. (2020)	07032943-1	volcanic rock	infant arc	Imoutojima	bulk rock	39.8	52.8	0.58	14.68	9.18	0.15	7.11	11.04	2.15	0.42	0.07	98.19		0.13	4.34	25.53	145.88	0.75	0.14	0.11	0.92	0.08	1.95	5.97	0.86	4.79	47.42	1.32	1.67	0.61	2.2	0.43	2.93	0.68	1.99	0.31	1.98	0.31	20.06	0.92	0.01	30.07	182.357	0.70354
Ishizuka et al. (2020)	07032943-2	volcanic rock	infant arc	Imoutojima	bulk rock	39.8	52	0.62	14.88	9.34	0.15	7.78	10.77	2.31	0.34	0.12	98.3		0.12	3.96	19.42	143.12	0.99	0.19	0.09	1.13	0.08	2.46	6.52	1.05	5.74	49.57	1.47	1.92	0.67	2.65	0.48	3.23	0.71	2.14	0.32	2.14	0.34	21.99	0.6	0.01	20.42	102.211
Ishizuka et al. (2020)	12062901-3	volcanic rock	infant arc	Imoutojima	bulk rock		52.76	0.82	16.54	9.23	0.16	5.37	9.83	2.61	0.45	0.12	97.88		0.15	5.33	29.91	186.64	1.12	0.23	0.11	1.42	0.1	3.53	9.16	1.41	7.52	68.14	1.87	2.37	0.89	3.37	0.6	4.07	0.88	2.74	0.42	2.82	0.42	28.66	0.65	0.01	22.73	130.043
Ishizuka et al. (2020)	12062901B	volcanic rock	infant arc	Imoutojima	bulk rock		51.32	0.67	15.96	9.42	0.13	6.07	11.41	2.33	0.44	0.09	97.84		0.54	8.25	35.11	207.75	0.71	0.2	0.15	0.84	0.06	2.47	6.47	0.94	5.23	41.08	1.16	1.68	0.69	2.28	0.42	2.79	0.62	1.79	0.28	1.8	0.29	18.74	2.67	0.02	40.93	175.55
Ishizuka et al. (2020)	12062902-1	volcanic rock	infant arc	Imoutojima	bulk rock		65.37	0.62	14.58	5.13	0.07	2.26	4.91	4.3	1.19	0.11	98.54		0.24	18.46	95.25	142.31	1.73	0.66	0.34	3.1	0.22	6.04	15.78	2.47	12.85	139.02	3.81	3.91	1.15	5.04	0.89	6	1.32	3.87	0.6	3.99	0.63	39.8	0.37		28.12	144.318
Ishizuka et al. (2020)	12062902-2	volcanic rock	infant arc	Imoutojima	bulk rock		64.28	0.63	14.55	5.65	0.13	2.62	5.25	3.92	1	0.12	98.14		0.24	13.09	89.27	152.59	1.98	0.63	0.27	3.03	0.2	6.3	16.24	2.45	12.81	138.17	3.75	4.05	1.14	5.13	0.91	6.32	1.46	4.32	0.67	4.61	0.7	46.53	0.38		20.77	141.698	0.70348
Ishizuka et al. (2020)	12062903A-2	volcanic rock	infant arc	Imoutojima	bulk rock		53.76	0.7	14.59	9.44	0.17	6.54	10.22	2.38	0.43	0.09	98.33		0.14	4.89	30.38	159.38	1.04	0.21	0.12	1.32	0.09	2.6	7.43	1.15	6.38	57.24	1.74	2.13	0.77	3.04	0.55	3.58	0.83	2.41	0.37	2.47	0.39	25.31	0.66		23.17	144.667
Ishizuka et al. (2020)	12062903A-3	volcanic rock	infant arc	Imoutojima	bulk rock		54.52	0.7	14.65	9.35	0.17	6.38	10.15	2.44	0.41	0.1	98.85		0.16	5.48	35.53	159.07	1.04	0.21	0.11	1.31	0.09	2.71	7.77	1.19	6.48	58.19	1.71	2.17	0.78	3.01	0.55	3.71	0.8	2.47	0.36	2.51	0.37	25.05	0.77		26.68	169.19	0.70355
Ishizuka et al. (2020)	12062905-1	volcanic rock	infant arc	Imoutojima	bulk rock		54.14	0.7	14.9	9.02	0.17	6.24	10	2.51	0.46	0.12	98.26		0.15	5.28	33.18	165.21	1.14	0.21	0.12	1.36	0.09	2.91	7.74	1.19	6.54	64.66	1.75	2.26	0.78	3.11	0.6	3.84	0.85	2.57	0.4	2.62	0.41	27.21	0.74		25.19	158
Ishizuka et al. (2020)	12062905-2	volcanic rock	infant arc	Imoutojima	bulk rock		48.39	0.9	15.55	10.1	0.14	6.02	13.32	2.27	0.4	0.2	97.28		0.22	8.09	21.22	246.33	0.8	0.25	0.16	1.63	0.1	6.64	9.64	2.04	11	51.94	1.46	3.17	1.1	4.47	0.79	5.13	1.19	3.6	0.52	3.36	0.52	43.29	0.86	0.01	31.97	84.88
Ishizuka et al. (2020)	12062906-2	volcanic rock	infant arc	Imoutojima	bulk rock		49.22	0.79	15.8	9.72	0.19	7.33	12.37	1.97	0.32	0.08	97.78		0.06	2.45	14.63	159.23	0.8	0.15	0.06	1	0.07	1.96	6.06	0.93	5.55	41	1.34	1.98	0.74	2.75	0.5	3.24	0.72	2.14	0.31	2.1	0.32	20.93	0.44		16.89	97.5333
Ishizuka et al. (2020)	12062906-3	volcanic rock	infant arc	Imoutojima	bulk rock		49.49	0.77	15.57	10.23	0.18	7.27	12.04	1.99	0.19	0.08	97.79		0.14	2.57	12.46	163.16	0.83	0.15	0.07	1.01	0.07	1.91	5.57	0.89	5.25	45.14	1.35	1.84	0.75	2.67	0.48	3.2	0.74	2.22	0.34	2.21	0.35	21.23	0.97	0.01	17.42	83.0667	0.70351
Ishizuka et al. (2020)	12062906-5	volcanic rock	infant arc	Imoutojima	bulk rock		54.29	0.7	14.73	9.12	0.17	6.27	10.3	2.48	0.44	0.1	98.58		0.14	4.83	35.9	162.05	1	0.17	0.11	1.16	0.1	2.45	7.31	1.09	5.93	56.55	1.51	2.03	0.74	2.84	0.51	3.29	0.79	2.33	0.35	2.42	0.35	25.93	0.83		28.16	211.176	0.70357
Ishizuka et al. (2020)	12063002-1	volcanic rock	infant arc	Imoutojima	bulk rock		51.14	0.84	15.73	9.56	0.17	6.78	10.8	2.49	0.31	0.12	97.93		0.08	3.48	24.9	207.28	1.13	0.28	0.11	1.63	0.11	3.77	10.27	1.47	7.79	71.02	1.87	2.57	0.86	3.16	0.61	3.83	0.91	2.61	0.39	2.49	0.4	25.87	0.3		12.4	88.9286	0.70341
Ishizuka et al. (2020)	12063003-7	volcanic rock	infant arc	Imoutojima	bulk rock		50.71	0.71	15.12	9.47	0.14	7.31	11.57	2.26	0.47	0.07	97.83		0.18	6.78	31.87	170.23	0.81	0.17	0.1	0.96	0.07	2.03	5.92	0.9	5.05	43.82	1.25	1.82	0.7	2.37	0.47	2.94	0.69	2.01	0.3	1.94	0.3	19.2	1.08	0.01	40.24	187.471	0.70336
Ishizuka et al. (2020)	12063003-8	volcanic rock	infant arc	Imoutojima	bulk rock		52.45	0.83	16.61	9.48	0.16	5.55	10.05	2.58	0.44	0.13	98.28		0.13	4.99	26.27	191.49	1.08	0.24	0.11	1.47	0.1	3.09	8.66	1.35	7.32	64.67	1.9	2.49	0.89	3.08	0.63	3.99	0.9	2.67	0.42	2.73	0.44	26.3	0.56	0.01	20.64	109.458
Ishizuka et al. (2020)	12063004-1	volcanic rock	infant arc	Imoutojima	bulk rock		54.43	0.7	14.84	9.17	0.16	6.2	9.81	2.56	0.38	0.16	98.41		0.11	4.18	31.49	161.41	1.03	0.2	0.11	1.26	0.12	3.11	7.73	1.34	7.12	59.38	1.79	2.3	0.8	3.4	0.63	4.14	0.95	2.78	0.42	2.9	0.45	29.42	0.57		21.21	157.45
Ishizuka et al. (2020)	07032938-1	volcanic rock	infant arc	Meijima	bulk rock		56.16	0.79	16.13	8.98	0.14	4.7	8.86	2.8	0.73	0.15	99.46		0.22	9.05	50.5	180.32	1.24	0.28	0.17	1.74	0.13	3.72	10.63	1.48	8.18	85.78	2.33	2.81	0.86	3.45	0.65	4.34	1	2.97	0.45	2.86	0.47	31.81	0.79		32.8	180.357	0.7035
Ishizuka et al. (2020)	07032938-2	volcanic rock	infant arc	Meijima	bulk rock		55.55	0.81	16.14	9.19	0.14	4.9	8.9	2.92	0.58	0.17	99.3		0.19	7.33	48.58	175.6	1.47	0.31	0.2	1.67	0.14	3.68	10.04	1.52	7.98	83.87	2.33	2.67	0.86	3.48	0.63	4.25	0.94	2.83	0.45	2.91	0.44	29.45	0.63		23.61	156.71
Ishizuka et al. (2020)	7032939	volcanic rock	infant arc	Meijima	bulk rock		55.76	0.82	15.88	8.89	0.15	4.73	9.01	2.84	0.78	0.12	98.98		0.23	8.76	56.65	179.76	1.31	0.32	0.17	1.76	0.16	3.91	10.69	1.7	8.66	88.7	2.28	2.84	0.83	3.49	0.68	4.47	1.02	2.96	0.47	3.02	0.47	30.21	0.71		27.75	177.031
Ishizuka et al. (2020)	07032940-2	volcanic rock	infant arc	Meijima	bulk rock		53.76	0.77	15.17	8.92	0.14	7.1	10.16	2.67	0.22	0.17	99.09		0.06	2.22	32.91	151.86	1.42	0.26	0.13	1.5	0.11	2.89	7.92	1.33	7.2	62.27	1.92	2.36	0.8	3.23	0.58	3.91	0.87	2.55	0.39	2.54	0.4	25.35	0.23		8.6	126.577
Ishizuka et al. (2020)	07032940-3	volcanic rock	infant arc	Meijima	bulk rock		54.31	0.71	14.72	9.51	0.15	7.07	9.55	2.46	0.49	0.1	99.07		0.15	5.76	35.9	144.75	1.24	0.19	0.11	1.27	0.09	2.77	8.28	1.28	6.78	60.85	1.67	2.31	0.74	2.84	0.54	3.65	0.81	2.42	0.39	2.39	0.37	24.64	0.76		29.62	188.947	0.70357
Ishizuka et al. (2020)	07032940-4	volcanic rock	infant arc	Meijima	bulk rock		54.17	0.71	14.89	9.52	0.15	7.08	9.54	2.45	0.5	0.17	99.19		0.14	5.4	32.67	148.19	1.02	0.19	0.1	1.23	0.09	3.62	9.76	1.36	7.31	61.65	1.67	2.21	0.74	3.07	0.57	3.82	0.86	2.64	0.41	2.58	0.39	28.39	0.74		28.69	171.947
Ishizuka et al. (2020)	07032940-5	volcanic rock	infant arc	Meijima	bulk rock		49.35	0.74	15.45	10.17	0.16	7.66	12.59	2.01	0.38	0.14	98.65		0.11	4.08	13.92	159.61	0.68	0.12	0.19	1.07	0.11	1.9	5.53	0.83	4.97	40.31	1.22	1.81	0.71	2.35	0.46	3.04	0.66	2.04	0.31	1.97	0.31	19.55	0.88	0.01	32.68	116
Ishizuka et al. (2020)	07032940-6	volcanic rock	infant arc	Meijima	bulk rock		48.57	0.71	15.48	9.71	0.16	8.12	13.43	1.86	0.24	0.09	98.37		0.14	3.74	9.56	183.5	0.52	0.07	0.12	0.95	0.06	1.55	4.81	0.79	4.72	35.14	0.99	1.8	0.63	2.18	0.44	2.99	0.67	1.89	0.3	1.89	0.29	20.17	1.83	0.01	49.99	136.571
[truncated: 5 more columns]
